# Supplementary material for: Proteomic Analysis of the Acidocalcisome, an Organelle Conserved from Bacteria to Human Cells
Source: PubMed Central journal article supplement (PMC4263762; doi:10.1371/journal.ppat.1004555), 2014-12-11
Supplement: ppat.1004555.s011.pdf [file ppat.1004555.s011.pdf]

Proteins

|     |                |                                                                                                   |     |       |      |    |   |   |   |    |      |    |   |   |    |   |   |  |  |
|-----|----------------|---------------------------------------------------------------------------------------------------|-----|-------|------|----|---|---|---|----|------|----|---|---|----|---|---|--|--|
| 541 | Tb927.6.1550   | hypothetical protein, conserved,leucine-rich repeat protein (LRRP), putative                      | 353 | 38.8  | 0.99 | 45 | 1 | 1 | 4 | 3  |      |    |   |   |    |   |   |  |  |
| 542 | Tb927.7.540    | chaperone protein DNAJ, putative                                                                  | 457 | 50.6  | 1    | 46 | 1 | 1 | 2 | 5  |      |    |   |   |    |   |   |  |  |
| 543 | Tb927.7.5320   | hypothetical protein, conserved                                                                   | 746 | 83.4  | 1    | 53 | 1 | 1 | 2 | 2  |      |    |   |   |    |   |   |  |  |
| 544 | Tb927.10.14720 | peroxin 13                                                                                        | 391 | 42.1  | 1    | 53 | 1 | 1 | 4 | 3  |      |    |   |   |    |   |   |  |  |
| 545 | Tb927.4.1600   | hypothetical protein, conserved                                                                   | 234 | 27.0  | 1    | 52 | 1 | 1 | 1 | 5  |      |    |   |   |    |   |   |  |  |
| 546 | Tb927.9.3370   | thioredoxin                                                                                       | 107 | 12.1  | 0.98 | 44 | 1 | 1 | 1 | 10 |      |    |   |   |    |   |   |  |  |
| 547 | Tb927.10.10800 | hypothetical protein, conserved                                                                   | 452 | 49.9  | 1    | 46 | 1 | 1 | 2 | 8  | 0.44 | 27 | 1 | 1 | 1  | 1 | 8 |  |  |
| 548 | Tb927.7.3810   | hypothetical protein, conserved                                                                   | 381 | 41.6  | 1    | 49 | 1 | 1 | 3 | 4  |      |    |   |   |    |   |   |  |  |
| 549 | Tb927.10.7700  | ABC transporter, putative                                                                         | 668 | 75.0  | 1    | 48 | 1 | 1 | 2 | 2  |      |    |   |   |    |   |   |  |  |
| 550 | Tb927.8.8120   | hypothetical protein, conserved                                                                   | 268 | 30.0  | 0.99 | 48 | 1 | 1 | 1 | 6  | 0.49 | 27 | 1 | 1 | 1  | 1 | 6 |  |  |
| 551 | Tb927.7.2670   | hypothetical protein, conserved,zinc finger protein family member, putative                       | 461 | 49.6  | 0.99 | 44 | 1 | 1 | 2 | 2  |      |    |   |   |    |   |   |  |  |
| 552 | Tb927.9.10070  | hypothetical protein, conserved                                                                   | 315 | 35.8  | 1    | 48 | 1 | 1 | 1 | 4  |      |    |   |   |    |   |   |  |  |
| 553 | Tb927.10.15950 | TFIID-like protein, putative                                                                      | 262 | 28.8  | 1    | 48 | 1 | 1 | 1 | 5  |      |    |   |   |    |   |   |  |  |
| 554 | Tb927.5.1160   | hypothetical protein, conserved                                                                   | 228 | 25.5  | 1    | 48 | 1 | 1 | 4 | 9  |      |    |   |   |    |   |   |  |  |
| 555 | Tb927.6.2720   | calcium-binding protein, putative                                                                 | 359 | 41.6  | 1    | 48 | 1 | 1 | 1 | 3  |      |    |   |   |    |   |   |  |  |
| 556 | Tb927.11.15240 | small GTPase, putative,ras-related protein rab-2a, putative                                       | 212 | 23.5  | 1    | 46 | 1 | 1 | 1 | 15 |      |    |   |   |    |   |   |  |  |
| 557 | Tb927.10.600   | hypothetical protein, conserved                                                                   | 541 | 62.7  |      |    |   |   |   |    | 1    | 90 | 2 | 2 | 3  | 7 |   |  |  |
| 558 | Tb927.9.15060  | rRNA processing protein, putative                                                                 | 251 | 28.4  | 0.99 |    |   |   |   |    | 64   | 2  | 1 | 2 | 14 |   |   |  |  |
| 559 | Tb927.9.5040   | cAMP-specific phosphodiesterase                                                                   | 930 | 103.6 | 1    |    |   |   |   |    | 136  | 3  | 3 | 5 | 8  |   |   |  |  |
| 560 | Tb927.8.4500   | eukaryotic translation initiation factor 4 gamma, putative                                        | 749 | 84.5  | 1    |    |   |   |   |    | 108  | 2  | 2 | 4 | 5  |   |   |  |  |
| 561 | Tb927.9.5280   | hypothetical protein, conserved                                                                   | 274 | 31.9  | 1    |    |   |   |   |    | 73   | 1  | 1 | 4 | 18 |   |   |  |  |
| 562 | Tb927.2.4090   | hypothetical protein, conserved                                                                   | 270 | 29.3  | 1    |    |   |   |   |    | 45   | 1  | 1 | 3 | 14 |   |   |  |  |
| 563 | Tb927.8.4890   | endoplasmic reticulum oxidoreductin, putative,pol-associated gene 1                               | 442 | 49.2  | 1    |    |   |   |   |    | 59   | 1  | 1 | 1 | 8  |   |   |  |  |
| 564 | Tb927.10.790   | vesicle-associated membrane protein, putative,synaptobrevin, putative                             | 239 | 26.5  | 1    |    |   |   |   |    | 56   | 1  | 1 | 1 | 7  |   |   |  |  |
| 565 | Tb927.11.3240  | T-complex protein 1, zeta subunit, putative                                                       | 544 | 59.5  | 1    |    |   |   |   |    | 113  | 3  | 3 | 5 | 6  |   |   |  |  |
| 566 | Tb927.11.10170 | hypothetical protein, conserved                                                                   | 213 | 24.3  | 1    |    |   |   |   |    | 49   | 1  | 1 | 5 | 12 |   |   |  |  |
| 567 | Tb927.10.10880 | ATP-binding cassette protein, putative,ABC transporter, putative,ATPase, putative                 | 684 | 77.6  | 0.98 |    |   |   |   |    | 66   | 2  | 2 | 2 | 7  |   |   |  |  |
| 568 | Tb927.11.2570  | hypothetical protein, conserved                                                                   | 573 | 63.1  | 1    |    |   |   |   |    | 93   | 1  | 1 | 1 | 6  |   |   |  |  |
| 569 | Tb927.8.3150   | T-complex protein 1, gamma subunit, putative                                                      | 556 | 60.8  | 1    |    |   |   |   |    | 76   | 1  | 1 | 5 | 5  |   |   |  |  |
| 570 | Tb927.11.11160 | sodium/sulphate symporter, putative                                                               | 728 | 81.4  | 1    |    |   |   |   |    | 54   | 1  | 1 | 2 | 2  |   |   |  |  |
| 571 | Tb927.10.14030 | hypothetical protein, conserved                                                                   | 449 | 50.4  | 1    |    |   |   |   |    | 68   | 1  | 1 | 1 | 3  |   |   |  |  |
| 572 | Tb927.11.2120  | hypothetical protein, conserved                                                                   | 788 | 88.8  | 1    |    |   |   |   |    | 58   | 1  | 1 | 2 | 3  |   |   |  |  |
| 573 | Tb927.11.14960 | pumilio/PUF RNA binding protein 7, putative                                                       | 704 | 78.6  | 0.99 |    |   |   |   |    | 46   | 1  | 1 | 5 | 2  |   |   |  |  |
| 574 | Tb927.6.4970   | serine/arginine-rich protein specific kinase SRPK, putative,protein kinase, putative              | 723 | 82.6  | 1    |    |   |   |   |    | 55   | 1  | 1 | 2 | 3  |   |   |  |  |
| 575 | Tb927.10.14390 | hypothetical protein, conserved                                                                   | 555 | 60.7  | 1    |    |   |   |   |    | 52   | 1  | 1 | 3 | 5  |   |   |  |  |
| 576 | Tb927.9.9940   | PACRGB,flagellar component                                                                        | 312 | 35.3  | 1    |    |   |   |   |    | 52   | 1  | 1 | 1 | 9  |   |   |  |  |
| 577 | Tb927.10.4430  | pumilio RNA binding protein PUF1                                                                  | 572 | 63.8  | 1    |    |   |   |   |    | 51   | 1  | 1 | 2 | 5  |   |   |  |  |
| 578 | Tb927.6.5210   | variant surface glycoprotein (VSG, pseudogene), putative,variant surface glycoprotein, frameshift | 523 | 55.8  | 0.99 |    |   |   |   |    | 51   | 1  | 1 | 1 | 2  |   |   |  |  |
| 579 | Tb927.8.1240   | electron transfer flavoprotein-ubiquinone oxidoreductase, putative                                | 564 | 62.3  | 1    |    |   |   |   |    | 49   | 1  | 1 | 1 | 6  |   |   |  |  |
| 580 | Tb927.10.12260 | cytosolic nonspecific dipeptidase, putative,peptidase (M20/M25/M40 family), putative              | 475 | 51.5  | 0.99 |    |   |   |   |    | 48   | 1  | 1 | 2 | 4  |   |   |  |  |
