# Supplementary material for: Proteomic Analysis of the Acidocalcisome, an Organelle Conserved from Bacteria to Human Cells
Source: PubMed Central journal article supplement (PMC4263762; doi:10.1371/journal.ppat.1004555), 2014-12-11
Supplement: ppat.1004555.s012.pdf [file ppat.1004555.s012.pdf]

Peptides

| Accession                            | Protein                      | Start                                                                                                        | End                                                                                                    | Modifications | Score                                                                                                  | Accession | Protein | Start | End                                | Modifications | Score |      |     |    |    |      |                                    |      |
|--------------------------------------|------------------------------|--------------------------------------------------------------------------------------------------------------|--------------------------------------------------------------------------------------------------------|---------------|--------------------------------------------------------------------------------------------------------|-----------|---------|-------|------------------------------------|---------------|-------|------|-----|----|----|------|------------------------------------|------|
| 10                                   | T0927.6.4380<br>T0927.6.4300 | glyceroldehyde 3-phosphate dehydrogenase, glycosomal<br>glyceroldehyde 3-phosphate dehydrogenase, glycosomal | 1.00                                                                                                   | 2540          | 405                                                                                                    | 52        | 35      | 88.3  | AAALNIPSTTGAAK                     | 34.4          | 1.00  | 2259 | 402 | 48 | 27 | 80.5 | AAALNIPSTTGAAK                     | 34.4 |
|                                      |                              |                                                                                                              | AAALNIPSTTGAAK Deamidated (N5)                                                                         | 25.8          | AAALNIPSTTGAAK Deamidated (N5)                                                                         | 37.8      |         |       |                                    |               |       |      |     |    |    |      |                                    |      |
|                                      |                              |                                                                                                              | AAALNIPSTTGAAK/GMVPSTGK Oxidation (M19)                                                                | 29.3          | AQRNPADLPWGK                                                                                           | 24.6      |         |       |                                    |               |       |      |     |    |    |      |                                    |      |
|                                      |                              |                                                                                                              | AQRNPADLPWGK                                                                                           | 39.2          | AQRNPADLPWGK/GVEYVIESTGLFTVK                                                                           | 25.3      |         |       |                                    |               |       |      |     |    |    |      |                                    |      |
|                                      |                              |                                                                                                              | AQRNPADLPWGK/GVEYVIESTGLFTVK                                                                           | 12.9          | AQRNPADLPWGK/GVEYVIESTGLFTVK Deamidated (N4)                                                           | 24.9      |         |       |                                    |               |       |      |     |    |    |      |                                    |      |
|                                      |                              |                                                                                                              | AQRNPADLPWGK/GVEYVIESTGLFTVK Deamidated (N4)                                                           | 7.6           | AQRNPADLPWGK/GVEYVIESTGLFTVK Deamidated (G2)                                                           | 17.0      |         |       |                                    |               |       |      |     |    |    |      |                                    |      |
|                                      |                              |                                                                                                              | AQRNPADLPWGK/GVEYVIESTGLFTVK Deamidated (G2)                                                           | 7.3           | ATLQNNLPNER                                                                                            | 41.4      |         |       |                                    |               |       |      |     |    |    |      |                                    |      |
|                                      |                              |                                                                                                              | ATLQNNLPNER                                                                                            | 31.5          | ATLQNNLPNER Deamidated (N5)                                                                            | 52.5      |         |       |                                    |               |       |      |     |    |    |      |                                    |      |
|                                      |                              |                                                                                                              | ATLQNNLPNER Deamidated (N5)                                                                            | 39.0          | ATLQNNLPNER Deamidated (N6)                                                                            | 42.5      |         |       |                                    |               |       |      |     |    |    |      |                                    |      |
|                                      |                              |                                                                                                              | ATLQNNLPNER Deamidated (N6)                                                                            | 25.0          | ATLQNNLPNER Deamidated (N9)                                                                            | 35.4      |         |       |                                    |               |       |      |     |    |    |      |                                    |      |
|                                      |                              |                                                                                                              | ATLQNNLPNER Deamidated (N5)                                                                            | 18.7          | ATLQNNLPNER                                                                                            | 18.3      |         |       |                                    |               |       |      |     |    |    |      |                                    |      |
|                                      |                              |                                                                                                              | AVGMVFPSTGK                                                                                            | 35.4          | ATLQNNLPNER Deamidated (N5)                                                                            | 16.0      |         |       |                                    |               |       |      |     |    |    |      |                                    |      |
|                                      |                              |                                                                                                              | AVGMVFPSTGK Oxidation (M4)                                                                             | 37.3          | AVGMVFPSTGK                                                                                            | 28.1      |         |       |                                    |               |       |      |     |    |    |      |                                    |      |
|                                      |                              |                                                                                                              | AVGMVFPSTGK Oxidation (M4)- Deamidated (O10)                                                           | 43.9          | AVGMVFPSTGK Oxidation (M4)                                                                             | 37.1      |         |       |                                    |               |       |      |     |    |    |      |                                    |      |
|                                      |                              |                                                                                                              | DTSKEDAAAK                                                                                             | 45.5          | DTSKEDAAAK                                                                                             | 44.6      |         |       |                                    |               |       |      |     |    |    |      |                                    |      |
|                                      |                              |                                                                                                              | DTSKEDAAAKR                                                                                            | 46.4          | DTSKEDAAAKR                                                                                            | 38.9      |         |       |                                    |               |       |      |     |    |    |      |                                    |      |
|                                      |                              |                                                                                                              | EHHVSNASCTTNCLAPLVHLVK Carbamidomethyl (C10)- Carbamidomethyl (C14)                                    | 31.5          | EGFGISGLMTTYSYATQK                                                                                     | 41.8      |         |       |                                    |               |       |      |     |    |    |      |                                    |      |
|                                      |                              |                                                                                                              | EHHVSNASCTTNCLAPLVHLVK Carbamidomethyl (C10)- Carbamidomethyl (C14)- Deamidated (N13)                  | 23.7          | EHHVSNASCTTNCLAPLVHLVK Carbamidomethyl (C10)- Carbamidomethyl (C14)                                    | 46.0      |         |       |                                    |               |       |      |     |    |    |      |                                    |      |
|                                      |                              |                                                                                                              | FKHVSSTIK                                                                                              | 28.2          | EHHVSNASCTTNCLAPLVHLVK Carbamidomethyl (C10)- Carbamidomethyl (C14)- Deamidated (N13)                  | 33.9      |         |       |                                    |               |       |      |     |    |    |      |                                    |      |
|                                      |                              |                                                                                                              | GGRAALNIPSTTGAAK                                                                                       | 44.1          | EHHVSNASCTTNCLAPLVHLVK Deamidated (N7)- Carbamidomethyl (C10)- Carbamidomethyl (C14)                   | 44.6      |         |       |                                    |               |       |      |     |    |    |      |                                    |      |
|                                      |                              |                                                                                                              | GGRAALNIPSTTGAAK                                                                                       | 45.1          | IVSWYDNEWGYSYR                                                                                         | 46.0      |         |       |                                    |               |       |      |     |    |    |      |                                    |      |
|                                      |                              |                                                                                                              | LCVKAQR Carbamidomethyl (C3)                                                                           | 25.3          | IVSWYDNEWGYSYR Deamidated (N7)                                                                         | 45.4      |         |       |                                    |               |       |      |     |    |    |      |                                    |      |
|                                      |                              |                                                                                                              | LCVKAQRNADLPWGK Carbamidomethyl (C3)                                                                   | 25.0          | KVVSAPASGGAK                                                                                           | 34.1      |         |       |                                    |               |       |      |     |    |    |      |                                    |      |
|                                      |                              |                                                                                                              | IVSWYDNEWGYSYR                                                                                         | 49.3          | LGVEYVIESTGLFTVK                                                                                       | 8.5       |         |       |                                    |               |       |      |     |    |    |      |                                    |      |
|                                      |                              |                                                                                                              | IVSWYDNEWGYSYR Deamidated (N7)                                                                         | 19.9          | LTGMARVPTADSVVDTFIATR                                                                                  | 16.5      |         |       |                                    |               |       |      |     |    |    |      |                                    |      |
|                                      |                              |                                                                                                              | IVSWYDNEWGYSYR/VLVR                                                                                    | 35.4          | LTGMARVPTADSVVDTFIATR Oxidation (M4)                                                                   | 20.4      |         |       |                                    |               |       |      |     |    |    |      |                                    |      |
|                                      |                              |                                                                                                              | KVVSAPASGGAK                                                                                           | 43.4          | MPFGALCGDGLGNEIWDVDMNTDAR Carbamidomethyl (C7)- Deamidated (N14)                                       | 9.9       |         |       |                                    |               |       |      |     |    |    |      |                                    |      |
|                                      |                              |                                                                                                              | LGVEYVIESTGLFTVK                                                                                       | 12.3          | NILGYDEELVSDIFSISR                                                                                     | 43.8      |         |       |                                    |               |       |      |     |    |    |      |                                    |      |
|                                      |                              |                                                                                                              | LTGMARVPTADSVVDTFIATR Oxidation (M4)                                                                   | 38.3          | NILGYDEELVSDIFSISR Deamidated (N1)                                                                     | 7.3       |         |       |                                    |               |       |      |     |    |    |      |                                    |      |
|                                      |                              |                                                                                                              | MPFGALCGDGLGNEIWDVDMNTDAR Oxidation (M1)- Oxidation (M24)- Carbamidomethyl (C7)                        | 16.4          | NPADLPWGK                                                                                              | 30.4      |         |       |                                    |               |       |      |     |    |    |      |                                    |      |
|                                      |                              |                                                                                                              | NILGYDEELVSDIFSISR                                                                                     | 47.5          | NPADLPWGK/GVEYVIESTGLFTVK                                                                              | 30.5      |         |       |                                    |               |       |      |     |    |    |      |                                    |      |
|                                      |                              |                                                                                                              | SAEGHLRGGAR                                                                                            | 24.6          | NPADLPWGK/GVEYVIESTGLFTVK Deamidated (N1)                                                              | 45.7      |         |       |                                    |               |       |      |     |    |    |      |                                    |      |
|                                      |                              |                                                                                                              | SKPSVAKDITLVNGHNR                                                                                      | 70.9          | NPADLPWGK/GVEYVIESTGLFTVK Deamidated (N1)                                                              | 21.0      |         |       |                                    |               |       |      |     |    |    |      |                                    |      |
|                                      |                              |                                                                                                              | SKPSVAKDITLVNGHNR Deamidated (N14)                                                                     | 48.3          | SKPSVAKDITLVNGHNR                                                                                      | 35.4      |         |       |                                    |               |       |      |     |    |    |      |                                    |      |
|                                      |                              |                                                                                                              | SKPSVAKDITLVNGHNR/LCVK Carbamidomethyl (C20)                                                           | 22.3          | SKPSVAKDITLVNGHNR Deamidated (N14)                                                                     | 57.1      |         |       |                                    |               |       |      |     |    |    |      |                                    |      |
|                                      |                              |                                                                                                              | SSVDSK                                                                                                 | 30.7          | SSVDSKATLQNNLPNER                                                                                      | 4.0       |         |       |                                    |               |       |      |     |    |    |      |                                    |      |
|                                      |                              |                                                                                                              | SSVDSKATLQNNLPNER                                                                                      | 75.3          | SSVDSKATLQNNLPNER Deamidated (N12)                                                                     | 42.8      |         |       |                                    |               |       |      |     |    |    |      |                                    |      |
|                                      |                              |                                                                                                              | SSVDSKATLQNNLPNER Deamidated (N12)                                                                     | 51.7          | SSVDSKATLQNNLPNER Deamidated (N16)                                                                     | 44.4      |         |       |                                    |               |       |      |     |    |    |      |                                    |      |
|                                      |                              |                                                                                                              | SSVDSKATLQNNLPNER Deamidated (N13)                                                                     | 76.7          | SSVDSKATLQNNLPNER Deamidated (Q11)                                                                     | 31.4      |         |       |                                    |               |       |      |     |    |    |      |                                    |      |
|                                      |                              |                                                                                                              | SSVDSKATLQNNLPNER                                                                                      | 41.0          | SSVDSKATLQNNLPNER                                                                                      | 31.8      |         |       |                                    |               |       |      |     |    |    |      |                                    |      |
|                                      |                              |                                                                                                              | SSVDSKATLQNNLPNER Deamidated (N12)                                                                     | 45.3          | SSVDSKATLQNNLPNER Deamidated (N12)                                                                     | 35.1      |         |       |                                    |               |       |      |     |    |    |      |                                    |      |
|                                      |                              |                                                                                                              | SSVDSKATLQNNLPNER Deamidated (N13)                                                                     | 71.5          | SSVDSKATLQNNLPNER Deamidated (N13)                                                                     | 51.2      |         |       |                                    |               |       |      |     |    |    |      |                                    |      |
|                                      |                              |                                                                                                              | TFVAGVINDYVNR                                                                                          | 44.9          | SSVDSKATLQNNLPNER Deamidated (Q11)                                                                     | 43.5      |         |       |                                    |               |       |      |     |    |    |      |                                    |      |
|                                      |                              |                                                                                                              | TFVAGVINDYVNR Oxidation (M4)                                                                           | 32.9          | TIKVINGFGR Deamidated (N7)                                                                             | 38.8      |         |       |                                    |               |       |      |     |    |    |      |                                    |      |
|                                      |                              |                                                                                                              | TFVAGVINDYVNR Oxidation (M4)- Deamidated (N7)                                                          | 33.5          | TYMKNLGYDEELVSDIFSISR Oxidation (M3)                                                                   | 39.9      |         |       |                                    |               |       |      |     |    |    |      |                                    |      |
| TIKVINGFGR                           | 22.0                         | VPTADSVVDTFIATR                                                                                              | 54.6                                                                                                   |               |                                                                                                        |           |         |       |                                    |               |       |      |     |    |    |      |                                    |      |
| TIKVINGFGR Deamidated (N7)           | 48.6                         | VVSAPASGGAK                                                                                                  | 36.3                                                                                                   |               |                                                                                                        |           |         |       |                                    |               |       |      |     |    |    |      |                                    |      |
| TYDGVSKDWR                           | 31.7                         | YFVGMKYDSVHGK Oxidation (M8)                                                                                 | 5.8                                                                                                    |               |                                                                                                        |           |         |       |                                    |               |       |      |     |    |    |      |                                    |      |
| TYDGVSKDWR/GGR                       | 23.3                         |                                                                                                              |                                                                                                        |               |                                                                                                        |           |         |       |                                    |               |       |      |     |    |    |      |                                    |      |
| TYMKNLGYDEELVSDIFSISR Oxidation (M3) | 25.1                         |                                                                                                              |                                                                                                        |               |                                                                                                        |           |         |       |                                    |               |       |      |     |    |    |      |                                    |      |
| VVSAPASGGAK                          | 40.6                         |                                                                                                              |                                                                                                        |               |                                                                                                        |           |         |       |                                    |               |       |      |     |    |    |      |                                    |      |
| YFVGMKYDSVHGK Oxidation (M8)         | 22.6                         |                                                                                                              |                                                                                                        |               |                                                                                                        |           |         |       |                                    |               |       |      |     |    |    |      |                                    |      |
| 11                                   | T0927.8.3530                 | glycerol 3-phosphate dehydrogenase [NAD]   glycosomal                                                        | 1.00                                                                                                   | 2050          | 283                                                                                                    | 39        | 31      | 86.7  | AAEAGVTAEPLEER                     | 40.6          | 1.00  | 2514 | 300 | 46 | 25 | 83.6 | AALISR                             | 15.2 |
|                                      |                              |                                                                                                              | AAEAGVTAEPLEER                                                                                         | 51.9          | AAEAGVTAEPLEER                                                                                         | 32.8      |         |       |                                    |               |       |      |     |    |    |      |                                    |      |
|                                      |                              |                                                                                                              | CWATTDVIGGEIASAMKNVLAASGALKGLGTENNAR Carbamidomethyl (C1)- Carbamidomethyl (C10)- Deamidated (N5)      | 10.3          | CWATTDVIGGEIASAMK Carbamidomethyl (C1)- Carbamidomethyl (C10)                                          | 81.8      |         |       |                                    |               |       |      |     |    |    |      |                                    |      |
|                                      |                              |                                                                                                              | GAELVLPVPTQFLR                                                                                         | 32.6          | CWATTDVIGGEIASAMKNVLAASGALK Carbamidomethyl (C1)- Carbamidomethyl (C10)                                | 41.8      |         |       |                                    |               |       |      |     |    |    |      |                                    |      |
|                                      |                              |                                                                                                              | GAVFSSGAFGTALACVLAK Carbamidomethyl (C15)                                                              | 37.9          | CWATTDVIGGEIASAMKNVLAASGALKGLGTENNAR Carbamidomethyl (C1)- Carbamidomethyl (C10)                       | 68.5      |         |       |                                    |               |       |      |     |    |    |      |                                    |      |
|                                      |                              |                                                                                                              | GAVFSSGAFGTALACVLAK Carbamidomethyl (C15)                                                              | 55.8          | GAELVLPVPTQFLR                                                                                         | 17.0      |         |       |                                    |               |       |      |     |    |    |      |                                    |      |
|                                      |                              |                                                                                                              | GLQKNSHLR Deamidated (N6)                                                                              | 41.6          | GAELVLPVPTQFLR Deamidated (Q12)                                                                        | 25.5      |         |       |                                    |               |       |      |     |    |    |      |                                    |      |
|                                      |                              |                                                                                                              | GIERSLLFPAQILEELFNPYPIGVAGPSFAIEVAK                                                                    | 28.3          | GAVFSSGAFGTALACVLAK Carbamidomethyl (C15)                                                              | 59.0      |         |       |                                    |               |       |      |     |    |    |      |                                    |      |
|                                      |                              |                                                                                                              | GLIERDLTLAAGTGEAVFQLPGLDGLLTCSSLSLR Carbamidomethyl (C32)                                              | 17.8          | GAVFSSGAFGTALACVLAK Carbamidomethyl (C15)                                                              | 35.3      |         |       |                                    |               |       |      |     |    |    |      |                                    |      |
|                                      |                              |                                                                                                              | GLMTNVTAAADINMAR Oxidation (M2)- Oxidation (M15)- Carbamidomethyl (C7)                                 | 49.1          | GIERSLLFPAQILEELFNPYPIGVAGPSFAIEVAK                                                                    | 33.6      |         |       |                                    |               |       |      |     |    |    |      |                                    |      |
|                                      |                              |                                                                                                              | IMTSDGSR Oxidation (M2)                                                                                | 20.6          | GIERSLLFPAQILEELFNPYPIGVAGPSFAIEVAK Deamidated (N20)                                                   | 35.5      |         |       |                                    |               |       |      |     |    |    |      |                                    |      |
|                                      |                              |                                                                                                              | KCESVSVHNNANEAR Carbamidomethyl (C2)- Oxidation (M10)                                                  | 33.1          | GLIERDLTLAAGTGEAVFQLPGLDGLLTCSSLSLR Carbamidomethyl (C32)                                              | 30.8      |         |       |                                    |               |       |      |     |    |    |      |                                    |      |
|                                      |                              |                                                                                                              | KHNHLPHICHEVYVNLVANGCAK Carbamidomethyl (C9)- Carbamidomethyl (C21)                                    | 32.1          | GLMTNVTAAADINMAR Carbamidomethyl (C7)                                                                  | 16.0      |         |       |                                    |               |       |      |     |    |    |      |                                    |      |
|                                      |                              |                                                                                                              | KHNHLPHICHEVYVNLVANGCAK Carbamidomethyl (C9)- Carbamidomethyl (C21)- Deamidated (N14)                  | 21.0          | GLMTNVTAAADINMAR Carbamidomethyl (C7)- Deamidated (N14)                                                | 58.4      |         |       |                                    |               |       |      |     |    |    |      |                                    |      |
|                                      |                              |                                                                                                              | KHNHLPHICHEVYVNLVANGCAK Carbamidomethyl (C9)- Carbamidomethyl (C21)- Deamidated (N19)                  | 25.6          | GLMTNVTAAADINMAR Deamidated (N5)- Carbamidomethyl (C7)                                                 | 70.4      |         |       |                                    |               |       |      |     |    |    |      |                                    |      |
|                                      |                              |                                                                                                              | KHNHLPHICHEVYVNLVANGCAK Deamidated (N3)- Deamidated (N19)- Carbamidomethyl (C9)- Carbamidomethyl (C21) | 15.7          | GLMTNVTAAADINMAR Oxidation (M2)- Deamidated (N5)- Carbamidomethyl (C7)                                 | 9.0       |         |       |                                    |               |       |      |     |    |    |      |                                    |      |
|                                      |                              |                                                                                                              | KHNHLPHICHEVYVNLVANGCAK Carbamidomethyl (C9)- Carbamidomethyl (C21)- Deamidated (N19)                  | 11.7          | GLMTNVTAAADINMAR Oxidation (M2)- Oxidation (M15)- Carbamidomethyl (C7)                                 | 17.1      |         |       |                                    |               |       |      |     |    |    |      |                                    |      |
|                                      |                              |                                                                                                              | KLNSKLADEGLPALPR Carbamidomethyl (C5)                                                                  | 66.4          | KCESVSVHNNANEAR Carbamidomethyl (C2)- Deamidated (N11)                                                 | 63.4      |         |       |                                    |               |       |      |     |    |    |      |                                    |      |
|                                      |                              |                                                                                                              | KLNSKLADEGLPALPR Deamidated (N3)- Carbamidomethyl (C5)                                                 | 86.4          | KHNHLPHICHEVYVNLVANGCAK Carbamidomethyl (C9)- Carbamidomethyl (C21)                                    | 35.6      |         |       |                                    |               |       |      |     |    |    |      |                                    |      |
|                                      |                              |                                                                                                              | LADEGLPALPR                                                                                            | 42.0          | KHNHLPHICHEVYVNLVANGCAK Carbamidomethyl (C9)- Carbamidomethyl (C21)- Deamidated (N14)                  | 11.1      |         |       |                                    |               |       |      |     |    |    |      |                                    |      |
|                                      |                              |                                                                                                              | LAKHNHLPHICHEVYVNLVANGCAK Carbamidomethyl (C12)- Carbamidomethyl (C24)- Deamidated (N22)               | 11.4          | KHNHLPHICHEVYVNLVANGCAK Carbamidomethyl (C9)- Carbamidomethyl (C21)- Deamidated (N19)                  | 18.8      |         |       |                                    |               |       |      |     |    |    |      |                                    |      |
|                                      |                              |                                                                                                              | LGGSISLEEKR                                                                                            | 45.7          | KHNHLPHICHEVYVNLVANGCAK Deamidated (N3)- Carbamidomethyl (C9)- Carbamidomethyl (C21)                   | 28.0      |         |       |                                    |               |       |      |     |    |    |      |                                    |      |
|                                      |                              |                                                                                                              | LGGSISLEEKR Deamidated (Q3)                                                                            | 60.3          | KHNHLPHICHEVYVNLVANGCAK Deamidated (N3)- Deamidated (N19)- Carbamidomethyl (C9)- Carbamidomethyl (C21) | 42.5      |         |       |                                    |               |       |      |     |    |    |      |                                    |      |
|                                      |                              |                                                                                                              | LGGSISLEEKRSY Deamidated (Q3)                                                                          | 29.7          | KHNHLPHICHEVYVNLVANGCAK Carbamidomethyl (C9)- Carbamidomethyl (C21)- Deamidated (N14)                  | 21.6      |         |       |                                    |               |       |      |     |    |    |      |                                    |      |
|                                      |                              |                                                                                                              | LNSKLADEGLPALPR Carbamidomethyl (C4)                                                                   | 48.5          | KHNHLPHICHEVYVNLVANGCAK Carbamidomethyl (C9)- Carbamidomethyl (C21)- Deamidated (N19)                  | 25.3      |         |       |                                    |               |       |      |     |    |    |      |                                    |      |
|                                      |                              |                                                                                                              | NFTVGMKLGGSISLEEKR Oxidation (M6)                                                                      | 8.7           | KLNSKLADEGLPALPR Carbamidomethyl (C5)                                                                  | 42.7      |         |       |                                    |               |       |      |     |    |    |      |                                    |      |
|                                      |                              |                                                                                                              | NHVSIR                                                                                                 | 24.0          | KLNSKLADEGLPALPR Deamidated (N3)- Carbamidomethyl (C5)                                                 | 49.8      |         |       |                                    |               |       |      |     |    |    |      |                                    |      |
|                                      |                              |                                                                                                              | NVLAASGALK                                                                                             | 51.0          | LADEGLPALPR                                                                                            | 43.4      |         |       |                                    |               |       |      |     |    |    |      |                                    |      |
|                                      |                              |                                                                                                              | NVLAASGALKGLGTENNAR                                                                                    | 66.9          | LGGSISLEEKR                                                                                            | 34.4      |         |       |                                    |               |       |      |     |    |    |      |                                    |      |
|                                      |                              |                                                                                                              | NVLAASGALKGLGTENNAR                                                                                    | 84.1          | LGGSISLEEKR Deamidated (Q3)                                                                            | 47.2      |         |       |                                    |               |       |      |     |    |    |      |                                    |      |
|                                      |                              |                                                                                                              | NVPVVMCSKIGIER Carbamidomethyl (C7)                                                                    | 32.1          | LNSKLADEGLPALPR Carbamidomethyl (C4)                                                                   | 74.8      |         |       |                                    |               |       |      |     |    |    |      |                                    |      |
|                                      |                              |                                                                                                              | NVPVVMCSKIGIER Oxidation (M8)- Carbamidomethyl (C7)                                                    | 38.7          | LNSKLADEGLPALPR Deamidated (N2)- Carbamidomethyl (C4)                                                  | 13.4      |         |       |                                    |               |       |      |     |    |    |      |                                    |      |
|                                      |                              |                                                                                                              | RGAVFGSAGFATALACVLAK Carbamidomethyl (C16)                                                             | 37.4          | NVLAASGALK                                                                                             | 34.7      |         |       |                                    |               |       |      |     |    |    |      |                                    |      |
|                                      |                              |                                                                                                              | SFKNLNSCK Carbamidomethyl (C9)                                                                         | 18.7          | NVLAASGALKGLGTENNAR                                                                                    | 24.2      |         |       |                                    |               |       |      |     |    |    |      |                                    |      |
|                                      |                              |                                                                                                              | SLLFPAQILEELFNPYPIGVAGPSFAIEVAK                                                                        | 24.9          | NVLAASGALKGLGTENNAR Deamidated (N1)                                                                    | 37.5      |         |       |                                    |               |       |      |     |    |    |      |                                    |      |
|                                      |                              |                                                                                                              | SLLFPAQILEELFNPYPIGVAGPSFAIEVAK Deamidated (N16)                                                       | 26.9          | NVLAASGALKGLGTENNAR Deamidated (N1)- Deamidated (N17)- Deamidated (N18)                                | 49.5      |         |       |                                    |               |       |      |     |    |    |      |                                    |      |
|                                      |                              |                                                                                                              | TSKAVAEQVTAEPLEER                                                                                      | 55.6          | NVLAASGALKGLGTENNAR Deamidated (N17)                                                                   | 43.9      |         |       |                                    |               |       |      |     |    |    |      |                                    |      |
|                                      |                              |                                                                                                              | TSKAVAEQVTAEPLEER                                                                                      | 49.6          | NVLAASGALKGLGTENNAR Deamidated (N18)                                                                   | 62.4      |         |       |                                    |               |       |      |     |    |    |      |                                    |      |
|                                      |                              |                                                                                                              | YSGVITYLKR                                                                                             | 55.3          | RGAVFGSAGFATALACVLAK Carbamidomethyl (C16)                                                             | 50.3      |         |       |                                    |               |       |      |     |    |    |      |                                    |      |
|                                      |                              |                                                                                                              |                                                                                                        |               | SLLFPAQILEELFNPYPIGVAGPSFAIEVAK                                                                        | 28.6      |         |       |                                    |               |       |      |     |    |    |      |                                    |      |
|                                      |                              |                                                                                                              |                                                                                                        |               | SLLFPAQILEELFNPYPIGVAGPSFAIEVAK Deamidated (N16)                                                       | 13.8      |         |       |                                    |               |       |      |     |    |    |      |                                    |      |
|                                      |                              |                                                                                                              |                                                                                                        |               | SLLFPAQILEELFNPYPIGVAGPSFAIEVAK Deamidated (Q8)- Deamidated (N16)                                      | 28.2      |         |       |                                    |               |       |      |     |    |    |      |                                    |      |
|                                      |                              |                                                                                                              |                                                                                                        |               | TSKAVAEQVTAEPLEER                                                                                      | 29.0      |         |       |                                    |               |       |      |     |    |    |      |                                    |      |
|                                      |                              |                                                                                                              |                                                                                                        |               | YSGVITYLKR                                                                                             | 53.2      |         |       |                                    |               |       |      |     |    |    |      |                                    |      |
|                                      |                              |                                                                                                              |                                                                                                        |               | VVNGKHENVYFLPGAPLPHLTTADAECAK Carbamidomethyl (C30)                                                    | 44.8      |         |       |                                    |               |       |      |     |    |    |      |                                    |      |
|                                      |                              | VVNGKHENVYFLPGAPLPHLTTADAECAK Deamidated (Q4)- Carbamidomethyl (C30)                                         | 33.9                                                                                                   |               |                                                                                                        |           |         |       |                                    |               |       |      |     |    |    |      |                                    |      |
| 12                                   | T0927.11.11330               | heat shock protein 70                                                                                        | 1.00                                                                                                   | 1306          | 63                                                                                                     | 28        | 21      | 39.9  | ARFEEELCGDIFR Carbamidomethyl (C7) | 37.4          | 1.00  | 1063 | 55  | 25 | 21 | 48.8 | ARFEEELCGDIFR Carbamidomethyl (C7) | 43.5 |
|                                      |                              |                                                                                                              | ARFEEELCGDIFR/DLQVPER Carbamidomethyl (C7)                                                             | 22.1          | ATNGDTHLGGEDFDRVWVH#TEEKR Deamidated (N3)                                                              | 29.9      |         |       |                                    |               |       |      |     |    |    |      |                                    |      |
|                                      |                              |                                                                                                              | AHHDVLLVGSTR                                                                                           | 51.5          | AHHDVLLVGSTR                                                                                           | 59.8      |         |       |                                    |               |       |      |     |    |    |      |                                    |      |
|                                      |                              |                                                                                                              | AVTVVRYFNDISOR                                                                                         | 28.1          | AVTVVRYFNDISOR                                                                                         | 33.2      |         |       |                                    |               |       |      |     |    |    |      |                                    |      |
|                                      |                              |                                                                                                              | AVTVVRYFNDISOR Deamidated (Q13)                                                                        | 18.6          | AVTVVRYFNDISOR Deamidated (Q13)                                                                        | 32.3      |         |       |                                    |               |       |      |     |    |    |      |                                    |      |
|                                      |                              |                                                                                                              | AVTVVRYFNDISOR/QAKDAGTAGLEVLR Deamidated (N10)                                                         | 28.9          | DAGTAGLEVLR                                                                                            | 64.6      |         |       |                                    |               |       |      |     |    |    |      |                                    |      |
|                                      |                              |                                                                                                              | DAGTAGLEVLR                                                                                            | 74.8          | DCHLLGTFDLGPPAPR Carbamidomethyl (C2)                                                                  | 16.4      |         |       |                                    |               |       |      |     |    |    |      |                                    |      |
|                                      |                              |                                                                                                              | INEPFAAAVYGLDKADEGKER                                                                                  | 31.7          | INEPFAAAVYGLDKADEGKER                                                                                  | 54.0      |         |       |                                    |               |       |      |     |    |    |      |                                    |      |
|                                      |                              |                                                                                                              | INEPFAAAVYGLDKADEGKER Deamidated (N3)                                                                  | 37.8          | LQADKNVATVWEALR                                                                                        | 28.1      |         |       |                                    |               |       |      |     |    |    |      |                                    |      |
|                                      |                              |                                                                                                              | LIGDAKKNQVMMNPTVFDKAR Oxidation (M12)                                                                  | 46.0          | LIGDAKKNQVMMNPTVFDKAR Oxidation (M12)                                                                  | 11.2      |         |       |                                    |               |       |      |     |    |    |      |                                    |      |
|                                      |                              |                                                                                                              | LSKADDER                                                                                               | 40.7          | MVSDAAKAYAEKQAR                                                                                        | 24.4      |         |       |                                    |               |       |      |     |    |    |      |                                    |      |
|                                      |                              |                                                                                                              | MKEWIESTLQK Oxidation (M1)                                                                             | 23.1          | MKGKLSLSNR                                                                                             | 7.3       |         |       |                                    |               |       |      |     |    |    |      |                                    |      |
|                                      |                              |                                                                                                              | MKGKLSLSNR                                                                                             | 27.8          | NOVITNDKGR                                                                                             | 14.1      |         |       |                                    |               |       |      |     |    |    |      |                                    |      |
|                                      |                              |                                                                                                              | NOVITNDKGR                                                                                             | 44.9          | NTINDPNVAGKLDADKNVATVWEALR                                                                             | 61.4      |         |       |                                    |               |       |      |     |    |    |      |                                    |      |
|                                      |                              |                                                                                                              | NOVITNDKGR Deamidated (N1)- Deamidated (N7)                                                            | 44.9          | NTINDPNVAGKLDADKNVATVWEALR Deamidated (N1)- Deamidated (N8)                                            | 55.0      |         |       |                                    |               |       |      |     |    |    |      |                                    |      |

Peptides

| Accession                                                     | Protein                                                           | Start                                                         | End  | Modifications | Score | Accession | Protein                                                                        | Start                                     | End                                                                            | Modifications | Score |    |      |                                    |      |                                    |      |
|---------------------------------------------------------------|-------------------------------------------------------------------|---------------------------------------------------------------|------|---------------|-------|-----------|--------------------------------------------------------------------------------|-------------------------------------------|--------------------------------------------------------------------------------|---------------|-------|----|------|------------------------------------|------|------------------------------------|------|
| 13                                                            | Tb927.11.9980 2-oxoglutarate dehydrogenase E1 component, putative | 1560                                                          | 116  | 41            | 33    | 44.0      | NIQVINDKGR Deamidated (N7)                                                     | 32.6                                      | NTINDPNAVKLDDADKNAVTTAVEEARL Deamidated (N18)                                  | 14.9          |       |    |      |                                    |      |                                    |      |
|                                                               |                                                                   |                                                               |      |               |       |           | NDVAMNFTVTPDAKR Oxidation (M5)                                                 | 32.2                                      | QATKDGATGLEVLK                                                                 | 20.1          |       |    |      |                                    |      |                                    |      |
|                                                               |                                                                   |                                                               |      |               |       |           | NTKDPNNAVKLDDADKNAVTTAVEEARL                                                   | 66.6                                      | QKLEIGVCAPIK Carbamidomethyl (C8)                                              | 23.5          |       |    |      |                                    |      |                                    |      |
|                                                               |                                                                   |                                                               |      |               |       |           | QATKDAGTAGLEVLK                                                                | 66.2                                      | QTEGLLLDAPLTLGETAGVMTALKR                                                      | 27.0          |       |    |      |                                    |      |                                    |      |
|                                                               |                                                                   |                                                               |      |               |       |           | SNPDEAWYGAADAFLTGK                                                             | 32.3                                      | SNPDEAWYGAADAFLTGK                                                             | 37.4          |       |    |      |                                    |      |                                    |      |
|                                                               |                                                                   |                                                               |      |               |       |           | TWPEEISSMLK Oxidation (M10)                                                    | 16.0                                      | SKGTGELLDDAPLTLGETAGVMTALKR                                                    | 62.3          |       |    |      |                                    |      |                                    |      |
|                                                               |                                                                   |                                                               |      |               |       |           | TTPSYAFDSEK                                                                    | 48.1                                      | SKQSTYSDNGPQVHGVFEGER                                                          | 44.3          |       |    |      |                                    |      |                                    |      |
|                                                               |                                                                   |                                                               |      |               |       |           | VMQLVSDFGGKELNK                                                                | 65.3                                      | SKQSTYSDNGPQVHGVFEGER Deamidated (Q2)                                          | 44.6          |       |    |      |                                    |      |                                    |      |
|                                                               |                                                                   |                                                               |      |               |       |           | VMQLVSDFGGKELNK Oxidation (M2)                                                 | 29.7                                      | VMQLVSDFGGKELNK                                                                | 48.7          |       |    |      |                                    |      |                                    |      |
|                                                               |                                                                   |                                                               |      |               |       |           | WLNNDGEASLDEYNHR                                                               | 62.1                                      | WLNNDGEASLDEYNHR                                                               | 34.8          |       |    |      |                                    |      |                                    |      |
|                                                               |                                                                   |                                                               |      |               |       |           | WLNNDGEASLDEYNHR Deamidated (Q6)                                               | 39.4                                      |                                                                                |               |       |    |      |                                    |      |                                    |      |
|                                                               |                                                                   |                                                               |      |               |       |           | WLNNDGEASLDEYNHRKLELGVCAPIK Carbamidomethyl (C24)                              | 37.1                                      |                                                                                |               |       |    |      |                                    |      |                                    |      |
|                                                               |                                                                   |                                                               |      |               |       |           | WLNNDGEASLDEYNHRKLELGVCAPIK Deamidated (N3) Carbamidomethyl (C24)              | 28.8                                      |                                                                                |               |       |    |      |                                    |      |                                    |      |
|                                                               |                                                                   |                                                               |      |               |       |           | AFQCFPHVNGDQPEDVAR Carbamidomethyl (C4) Carbamidomethyl (C13)                  | 15.5                                      | AFQCFPHVNGDQPEDVAR Carbamidomethyl (C4) Carbamidomethyl (C13)                  | 27.7          |       |    |      |                                    |      |                                    |      |
|                                                               |                                                                   |                                                               |      |               |       |           | AFQCFPHVNGDQPEDVAR Carbamidomethyl (C4) Carbamidomethyl (C13) Deamidated (N10) | 15.5                                      | AFQCFPHVNGDQPEDVAR Carbamidomethyl (C4) Carbamidomethyl (C13) Deamidated (N10) | 33.6          |       |    |      |                                    |      |                                    |      |
|                                                               |                                                                   |                                                               |      |               |       |           | AFQCFPHVNGDQPEDVAR Deamidated (Q2) Carbamidomethyl (C4) Carbamidomethyl (C13)  | 39.4                                      | AFQCFPHVNGDQPEDVAR Deamidated (Q2) Carbamidomethyl (C4) Carbamidomethyl (C13)  | 13.6          |       |    |      |                                    |      |                                    |      |
|                                                               |                                                                   |                                                               |      |               |       |           | ASAAPSTAYK                                                                     | 24.5                                      | ASAAPSTAYK                                                                     | 57.1          |       |    |      |                                    |      |                                    |      |
|                                                               |                                                                   |                                                               |      |               |       |           | ASAAPSTAYKTHDAEERYCECVFS Carbamidomethyl (C22) Carbamidomethyl (C24)           | 23.6                                      | ASAAPSTAYKTHDAEERYCECVFS Carbamidomethyl (C22) Carbamidomethyl (C24)           | 17.1          |       |    |      |                                    |      |                                    |      |
|                                                               |                                                                   |                                                               |      |               |       |           | AMTKELHDLTK                                                                    | 27.5                                      | AMTKELHDLTK                                                                    | 65.2          |       |    |      |                                    |      |                                    |      |
|                                                               |                                                                   |                                                               |      |               |       |           | AMTKELHDLTK Oxidation (M2)                                                     | 27.5                                      | AMTKELHDLTK Oxidation (M2)                                                     | 31.3          |       |    |      |                                    |      |                                    |      |
|                                                               |                                                                   |                                                               |      |               |       |           | DLSQFERPLTSPK                                                                  | 40.9                                      | DLSQFERPLTSPK Deamidated (N4)                                                  | 26.8          |       |    |      |                                    |      |                                    |      |
|                                                               |                                                                   |                                                               |      |               |       |           | ESLQPVWDLK                                                                     | 25.3                                      | ESLQPVWDLK                                                                     | 43.9          |       |    |      |                                    |      |                                    |      |
|                                                               |                                                                   |                                                               |      |               |       |           | FSDGDSLNLVLR Carbamidomethyl (C3)                                              | 41.8                                      | FSDGDSLNLVLR Carbamidomethyl (C3)                                              | 45.4          |       |    |      |                                    |      |                                    |      |
|                                                               |                                                                   |                                                               |      |               |       |           | FLQVAEDVTPVSPER                                                                | 79.9                                      | FLQVAEDVTPVSPER                                                                | 43.3          |       |    |      |                                    |      |                                    |      |
|                                                               |                                                                   |                                                               |      |               |       |           | GMKYSELGEVLEPTAVAR Oxidation (M2)                                              | 57.2                                      | GMKYSELGEVLEPTAVAR Oxidation (M2)                                              | 32.9          |       |    |      |                                    |      |                                    |      |
|                                                               |                                                                   |                                                               |      |               |       |           | GRLLTYNWK Oxidation (N4)                                                       | 9.1                                       | GRLLTYNWK Oxidation (N4)                                                       | 48.9          |       |    |      |                                    |      |                                    |      |
|                                                               |                                                                   |                                                               |      |               |       |           | IELSPFVAEVK                                                                    | 27.8                                      | IELSPFVAEVK                                                                    | 11.5          |       |    |      |                                    |      |                                    |      |
|                                                               |                                                                   |                                                               |      |               |       |           | LKAVLEGR                                                                       | 35.9                                      | LKAVLEGR                                                                       | 39.3          |       |    |      |                                    |      |                                    |      |
|                                                               |                                                                   |                                                               |      |               |       |           | LLYENDSFLGTSAR                                                                 | 60.1                                      | LLYENDSFLGTSAR                                                                 | 28.6          |       |    |      |                                    |      |                                    |      |
|                                                               |                                                                   |                                                               |      |               |       |           | LLYENDSFLGTSAR Deamidated (N6)                                                 | 56.1                                      | LLYENDSFLGTSAR Deamidated (N6)                                                 | 17.3          |       |    |      |                                    |      |                                    |      |
|                                                               |                                                                   |                                                               |      |               |       |           | LMFTLLANPSHLEAVNPVQGYTR                                                        | 26.5                                      | LMFTLLANPSHLEAVNPVQGYTR                                                        | 43.4          |       |    |      |                                    |      |                                    |      |
|                                                               |                                                                   |                                                               |      |               |       |           | LTLMIQAFEDYHLLAR                                                               | 5.1                                       | LTLMIQAFEDYHLLAR                                                               | 14.7          |       |    |      |                                    |      |                                    |      |
|                                                               |                                                                   |                                                               |      |               |       |           | LVEEGVTKEQTK                                                                   | 18.6                                      | LVEEGVTKEQTK                                                                   | 10.0          |       |    |      |                                    |      |                                    |      |
|                                                               |                                                                   |                                                               |      |               |       |           | LVMKGTGYYLNR Oxidation (M3) Carbamidomethyl (C4)                               | 32.3                                      | LVMKGTGYYLNR Oxidation (M3) Carbamidomethyl (C4)                               | 31.1          |       |    |      |                                    |      |                                    |      |
|                                                               |                                                                   |                                                               |      |               |       |           | MRNGKLMFTLLANPSHLEAVNPVQGYTR Oxidation (M1) Oxidation (M7) Deamidated (N3)     | 18.1                                      | MRNGKLMFTLLANPSHLEAVNPVQGYTR Oxidation (M1) Oxidation (M7) Deamidated (N3)     | 49.7          |       |    |      |                                    |      |                                    |      |
|                                                               |                                                                   |                                                               |      |               |       |           | NGKLMFTLLANPSHLEAVNPVQGYTR                                                     | 14.1                                      | NGKLMFTLLANPSHLEAVNPVQGYTR                                                     | 35.1          |       |    |      |                                    |      |                                    |      |
|                                                               |                                                                   |                                                               |      |               |       |           | NGKLMFTLLANPSHLEAVNPVQGYTR Deamidated (N1)                                     | 5.8                                       | NGKLMFTLLANPSHLEAVNPVQGYTR Deamidated (N1)                                     | 37.0          |       |    |      |                                    |      |                                    |      |
|                                                               |                                                                   |                                                               |      |               |       |           | NGKLMFTLLANPSHLEAVNPVQGYTR Oxidation (M8)                                      | 48.0                                      | NGKLMFTLLANPSHLEAVNPVQGYTR Oxidation (M8)                                      | 33.4          |       |    |      |                                    |      |                                    |      |
|                                                               |                                                                   |                                                               |      |               |       |           | NGGAFYHVESR                                                                    | 30.8                                      | NGGAFYHVESR                                                                    | 29.8          |       |    |      |                                    |      |                                    |      |
|                                                               |                                                                   |                                                               |      |               |       |           | RHWATPDVFR                                                                     | 28.1                                      | RHWATPDVFR                                                                     | 28.6          |       |    |      |                                    |      |                                    |      |
|                                                               |                                                                   |                                                               |      |               |       |           | SFPVILKEFVGTARELPEFK                                                           | 22.5                                      | SFPVILKEFVGTARELPEFK                                                           | 17.3          |       |    |      |                                    |      |                                    |      |
|                                                               |                                                                   |                                                               |      |               |       |           | SSPYCSDLGR Carbamidomethyl (C5)                                                | 37.0                                      | SSPYCSDLGR Carbamidomethyl (C5)                                                | 43.4          |       |    |      |                                    |      |                                    |      |
|                                                               |                                                                   |                                                               |      |               |       |           | STHDAERYICECVFS Carbamidomethyl (C11) Carbamidomethyl (C13)                    | 7.5                                       | STHDAERYICECVFS Carbamidomethyl (C11) Carbamidomethyl (C13)                    | 14.7          |       |    |      |                                    |      |                                    |      |
|                                                               |                                                                   |                                                               |      |               |       |           | TDPLDAEDDSLRSPQVPR                                                             | 58.8                                      | TDPLDAEDDSLRSPQVPR                                                             | 10.0          |       |    |      |                                    |      |                                    |      |
|                                                               |                                                                   |                                                               |      |               |       |           | VGFMDQLGGMSSSR Oxidation (M4) Oxidation (M11)                                  | 39.3                                      | VGFMDQLGGMSSSR Oxidation (M4) Oxidation (M11)                                  | 10.0          |       |    |      |                                    |      |                                    |      |
| VGFMDQLGGMSSSR Oxidation (M4) Oxidation (M11) Deamidated (Q6) | 13.1                                                              | VGFMDQLGGMSSSR Oxidation (M4) Oxidation (M11) Deamidated (Q6) | 10.0 |               |       |           |                                                                                |                                           |                                                                                |               |       |    |      |                                    |      |                                    |      |
| VHATPDVFR                                                     | 41.0                                                              | VHATPDVFR                                                     | 31.1 |               |       |           |                                                                                |                                           |                                                                                |               |       |    |      |                                    |      |                                    |      |
| VREGFVANK                                                     | 18.7                                                              | VREGFVANK                                                     | 49.7 |               |       |           |                                                                                |                                           |                                                                                |               |       |    |      |                                    |      |                                    |      |
| VQSLEKGEKDWGAALAFGLLLEGTAVR                                   | 17.9                                                              | VQSLEKGEKDWGAALAFGLLLEGTAVR                                   | 35.1 |               |       |           |                                                                                |                                           |                                                                                |               |       |    |      |                                    |      |                                    |      |
| VQSLEKGEKDWGAALAFGLLLEGTAVR Deamidated (Q2)                   | 23.5                                                              | VQSLEKGEKDWGAALAFGLLLEGTAVR Deamidated (Q2)                   | 37.0 |               |       |           |                                                                                |                                           |                                                                                |               |       |    |      |                                    |      |                                    |      |
| VVPSADMDNVEQSDICAR Oxidation (M10) Carbamidomethyl (C19)      | 25.0                                                              | VVPSADMDNVEQSDICAR Oxidation (M10) Carbamidomethyl (C19)      | 33.4 |               |       |           |                                                                                |                                           |                                                                                |               |       |    |      |                                    |      |                                    |      |
| YGHNEQDITTPQLYR                                               | 35.9                                                              | YGHNEQDITTPQLYR                                               | 29.8 |               |       |           |                                                                                |                                           |                                                                                |               |       |    |      |                                    |      |                                    |      |
| YSELGEVLEPTAVAR                                               | 41.1                                                              | YSELGEVLEPTAVAR                                               | 29.8 |               |       |           |                                                                                |                                           |                                                                                |               |       |    |      |                                    |      |                                    |      |
| YSEKLVEEGVTKEQTK                                              | 51.0                                                              | YSEKLVEEGVTKEQTK                                              | 29.8 |               |       |           |                                                                                |                                           |                                                                                |               |       |    |      |                                    |      |                                    |      |
| 14                                                            | Tb927.10.15410 glycosomal malate dehydrogenase                    | 1708                                                          | 163  | 35            | 24    | 68.4      | AGRGSATLSMAEAGAR                                                               | 34.0                                      | AGRGSATLSMAEAGAR                                                               | 19.5          |       |    |      |                                    |      |                                    |      |
|                                                               |                                                                   |                                                               |      |               |       |           | AGRGSATLSMAEAGAR Oxidation (M10)                                               | 24.4                                      | AGRGSATLSMAEAGAR Oxidation (M10)                                               | 3.6           |       |    |      |                                    |      |                                    |      |
|                                                               |                                                                   |                                                               |      |               |       |           | ANIEKGMNFR                                                                     | 28.2                                      | ANIEKGMNFR                                                                     | 23.7          |       |    |      |                                    |      |                                    |      |
|                                                               |                                                                   |                                                               |      |               |       |           | ANIEKGMNFR Oxidation (M7)                                                      | 17.0                                      | ANIEKGMNFR Oxidation (M7)                                                      | 20.0          |       |    |      |                                    |      |                                    |      |
|                                                               |                                                                   |                                                               |      |               |       |           | ANIEKGMNFR Oxidation (M7) Deamidated (N8)                                      | 23.9                                      | ANIEKGMNFR Oxidation (M7) Deamidated (N8)                                      | 21.1          |       |    |      |                                    |      |                                    |      |
|                                                               |                                                                   |                                                               |      |               |       |           | FINNARHPLAVASVPPVGGHSDVTPVFLFSQLPGLPEEGELTOR                                   | 50.0                                      | FINNARHPLAVASVPPVGGHSDVTPVFLFSQLPGLPEEGELTOR                                   | 49.7          |       |    |      |                                    |      |                                    |      |
|                                                               |                                                                   |                                                               |      |               |       |           | GSATLSMAEAGAR Oxidation (M7)                                                   | 37.4                                      | GSATLSMAEAGAR Oxidation (M7)                                                   | 27.7          |       |    |      |                                    |      |                                    |      |
|                                                               |                                                                   |                                                               |      |               |       |           | GVDFVAVGVR                                                                     | 30.1                                      | GVDFVAVGVR                                                                     | 66.3          |       |    |      |                                    |      |                                    |      |
|                                                               |                                                                   |                                                               |      |               |       |           | HPLAVASVPPVGGHSDVTPVFLFSQLPGLPEEGELTOR                                         | 67.2                                      | HPLAVASVPPVGGHSDVTPVFLFSQLPGLPEEGELTOR                                         | 42.5          |       |    |      |                                    |      |                                    |      |
|                                                               |                                                                   |                                                               |      |               |       |           | HPLAVASVPPVGGHSDVTPVFLFSQLPGLPEEGELTOR                                         | 34.2                                      | HPLAVASVPPVGGHSDVTPVFLFSQLPGLPEEGELTOR                                         | 68.1          |       |    |      |                                    |      |                                    |      |
|                                                               |                                                                   |                                                               |      |               |       |           | KRVQDQTEVVK                                                                    | 24.4                                      | KRVQDQTEVVK                                                                    | 13.8          |       |    |      |                                    |      |                                    |      |
|                                                               |                                                                   |                                                               |      |               |       |           | LGYYNKKLLGVTLDDGLR                                                             | 33.1                                      | LGYYNKKLLGVTLDDGLR                                                             | 74.8          |       |    |      |                                    |      |                                    |      |
|                                                               |                                                                   |                                                               |      |               |       |           | LGYYNKKLLGVTLDDGLR Deamidated (N7)                                             | 33.4                                      | LGYYNKKLLGVTLDDGLR Deamidated (N7)                                             | 62.8          |       |    |      |                                    |      |                                    |      |
|                                                               |                                                                   |                                                               |      |               |       |           | LLGVTLDDGLR                                                                    | 78.7                                      | LLGVTLDDGLR                                                                    | 36.8          |       |    |      |                                    |      |                                    |      |
|                                                               |                                                                   |                                                               |      |               |       |           | LLGVTLDDGLR                                                                    | 43.6                                      | LLGVTLDDGLR                                                                    | 41.1          |       |    |      |                                    |      |                                    |      |
|                                                               |                                                                   |                                                               |      |               |       |           | LPFGPMNAVEKEMKQISIVK Oxidation (M6) Oxidation (M13)                            | 31.4                                      | LPFGPMNAVEKEMKQISIVK Oxidation (M6) Oxidation (M13)                            | 18.7          |       |    |      |                                    |      |                                    |      |
|                                                               |                                                                   |                                                               |      |               |       |           | LPFGPMNAVEKEMKQISIVK Oxidation (M6) Oxidation (M13) Deamidated (N7)            | 19.7                                      | LPFGPMNAVEKEMKQISIVK Oxidation (M6) Oxidation (M13) Deamidated (N7)            | 50.6          |       |    |      |                                    |      |                                    |      |
|                                                               |                                                                   |                                                               |      |               |       |           | LPFWRPALAEAR                                                                   | 15.4                                      | LPFWRPALAEAR                                                                   | 41.1          |       |    |      |                                    |      |                                    |      |
|                                                               |                                                                   |                                                               |      |               |       |           | NKLLGVTLDDGLR                                                                  | 70.0                                      | NKLLGVTLDDGLR                                                                  | 35.6          |       |    |      |                                    |      |                                    |      |
|                                                               |                                                                   |                                                               |      |               |       |           | NKLLGVTLDDGLR Deamidated (N1)                                                  | 50.5                                      | NKLLGVTLDDGLR Deamidated (N1)                                                  | 38.6          |       |    |      |                                    |      |                                    |      |
|                                                               |                                                                   |                                                               |      |               |       |           | QLPYGSTLSLYDAGAPGVAADLSHVDR                                                    | 76.8                                      | QLPYGSTLSLYDAGAPGVAADLSHVDR                                                    | 34.2          |       |    |      |                                    |      |                                    |      |
|                                                               |                                                                   |                                                               |      |               |       |           | QLPYGSTLSLYDAGAPGVAADLSHVDR Deamidated (Q1)                                    | 60.3                                      | QLPYGSTLSLYDAGAPGVAADLSHVDR Deamidated (Q1)                                    | 39.9          |       |    |      |                                    |      |                                    |      |
|                                                               |                                                                   |                                                               |      |               |       |           | QLPYGSTLSLYDAGAPGVAADLSHVDRAGVTVK                                              | 71.4                                      | QLPYGSTLSLYDAGAPGVAADLSHVDRAGVTVK                                              | 73.9          |       |    |      |                                    |      |                                    |      |
|                                                               |                                                                   |                                                               |      |               |       |           | QLPYGSTLSLYDAGAPGVAADLSHVDRAGVTVK Deamidated (Q1)                              | 56.1                                      | QLPYGSTLSLYDAGAPGVAADLSHVDRAGVTVK Deamidated (Q1)                              | 58.7          |       |    |      |                                    |      |                                    |      |
|                                                               |                                                                   |                                                               |      |               |       |           | QSIIVKANIEK                                                                    | 48.5                                      | QSIIVKANIEK                                                                    | 64.2          |       |    |      |                                    |      |                                    |      |
|                                                               |                                                                   |                                                               |      |               |       |           | QSIIVKANIEK Oxidation (M14)                                                    | 30.4                                      | QSIIVKANIEK Oxidation (M14)                                                    | 48.8          |       |    |      |                                    |      |                                    |      |
|                                                               |                                                                   |                                                               |      |               |       |           | QSIIVKANIEK Oxidation (M14)                                                    | 48.7                                      | QSIIVKANIEK Oxidation (M14)                                                    | 75.8          |       |    |      |                                    |      |                                    |      |
|                                                               |                                                                   |                                                               |      |               |       |           | RLPGPMNAVEKEMK Oxidation (M14)                                                 | 6.2                                       | RLPGPMNAVEKEMK Oxidation (M14)                                                 | 72.5          |       |    |      |                                    |      |                                    |      |
|                                                               |                                                                   |                                                               |      |               |       |           | RLPGPMNAVEKEMK Oxidation (M7)                                                  | 33.2                                      | RLPGPMNAVEKEMK Oxidation (M7)                                                  | 29.0          |       |    |      |                                    |      |                                    |      |
|                                                               |                                                                   |                                                               |      |               |       |           | RVDVAGTEVVK                                                                    | 33.6                                      | RVDVAGTEVVK                                                                    | 42.0          |       |    |      |                                    |      |                                    |      |
|                                                               |                                                                   |                                                               |      |               |       |           | VQVAGTEVVK                                                                     | 30.5                                      | VQVAGTEVVK                                                                     | 33.0          |       |    |      |                                    |      |                                    |      |
|                                                               |                                                                   |                                                               |      |               |       |           | VQVAGTEVVK                                                                     | 22.7                                      | VQVAGTEVVK                                                                     | 8.7           |       |    |      |                                    |      |                                    |      |
|                                                               |                                                                   |                                                               |      |               |       |           | VSWVGAAGGIGQSLLLLR                                                             | 22.8                                      | VSWVGAAGGIGQSLLLLR                                                             | 53.2          |       |    |      |                                    |      |                                    |      |
|                                                               |                                                                   |                                                               |      |               |       |           | VSWVGAAGGIGQSLLLLR Deamidated (Q14)                                            | 27.9                                      | VSWVGAAGGIGQSLLLLR Deamidated (Q14)                                            | 25.1          |       |    |      |                                    |      |                                    |      |
|                                                               |                                                                   |                                                               |      |               |       |           | YAAGKLPVVKR                                                                    | 23.6                                      | YAAGKLPVVKR                                                                    | 17.4          |       |    |      |                                    |      |                                    |      |
|                                                               |                                                                   |                                                               |      |               |       |           |                                                                                |                                           |                                                                                | 45.8          |       |    |      |                                    |      |                                    |      |
|                                                               |                                                                   |                                                               |      |               |       |           |                                                                                |                                           |                                                                                | 26.7          |       |    |      |                                    |      |                                    |      |
|                                                               |                                                                   |                                                               |      |               |       |           |                                                                                |                                           |                                                                                | 15.2          |       |    |      |                                    |      |                                    |      |
|                                                               |                                                                   |                                                               |      |               |       |           | 15                                                                             | Tb927.9.12870 glycerol kinase, glycosomal | 1499                                                                           | 102           | 30    | 24 | 55.1 | AALQAIQLQNDVGSMKR                  | 62.6 | AALQAIQLQNDVGSMKR                  | 39.5 |
|                                                               |                                                                   |                                                               |      |               |       |           |                                                                                |                                           |                                                                                |               |       |    |      | AALQAIQLQNDVGSMKR Deamidated (N11) | 51.4 | AALQAIQLQNDVGSMKR Deamidated (N11) | 51.4 |
|                                                               |                                                                   |                                                               |      |               |       |           |                                                                                |                                           |                                                                                |               |       |    |      | AALQAIQLQNDVGSMKR Oxidation (M17)  | 53.3 | AALQAIQLQNDVGSMKR Oxidation (M17)  | 17.6 |
|                                                               |                                                                   |                                                               |      |               |       |           |                                                                                |                                           |                                                                                |               |       |    |      | DAGLNLSSLRVGGSLK                   | 53.6 | DAGLNLSSLRVGGSLK                   | 65.2 |
|                                                               |                                                                   |                                                               |      |               |       |           |                                                                                |                                           |                                                                                |               |       |    |      | FIFDER                             | 22.9 | FIFDER                             | 23.0 |
|                                                               |                                                                   |                                                               |      |               |       |           |                                                                                |                                           |                                                                                |               |       |    |      | GTIVGMLKTR Oxidation (M8)          | 41.3 | GTIVGMLKTR Oxidation (M8)          | 38.3 |
|                                                               |                                                                   |                                                               |      |               |       |           |                                                                                |                                           |                                                                                |               |       |    |      | KIAGITNQR                          | 51.1 | KIAGITNQR                          | 32.3 |
| KIAGITNQR Deamidated (Q10) Deamidated (N9)                    | 4.7                                                               | KIAGITNQR Deamidated (Q10) Deamidated (N9)                    | 38.1 |               |       |           |                                                                                |                                           |                                                                                |               |       |    |      |                                    |      |                                    |      |
| KVTAELGGGDMFAK Oxidation (M12)                                | 36.2                                                              | KVTAELGGGDMFAK Oxidation (M12)                                | 61.9 |               |       |           |                                                                                |                                           |                                                                                |               |       |    |      |                                    |      |                                    |      |
| KWSPLECEK Carbamidomethyl (C7)                                | 36.0                                                              | KWSPLECEK Carbamidomethyl (C7)                                | 32.7 |               |       |           |                                                                                |                                           |                                                                                |               |       |    |      |                                    |      |                                    |      |
| LKIPMETPEIR                                                   | 43.3                                                              | LKIPMETPEIR                                                   | 36.1 |               |       |           |                                                                                |                                           |                                                                                |               |       |    |      |                                    |      |                                    |      |
| LKIPMETPEIR Oxidation (M5)                                    | 38.0                                                              | LKIPMETPEIR Oxidation (M5)                                    | 16.0 |               |       |           |                                                                                |                                           |                                                                                |               |       |    |      |                                    |      |                                    |      |
| LROKASFR                                                      | 22.9                                                              | LROKASFR                                                      | 39.5 |               |       |           |                                                                                |                                           |                                                                                |               |       |    |      |                                    |      |                                    |      |
| LSGKAPVTDVNASR                                                | 66.7                                                              | LSGKAPVTDVNASR                                                | 54.7 |               |       |           |                                                                                |                                           |                                                                                |               |       |    |      |                                    |      |                                    |      |
| MKYVSSDQSTSTR                                                 | 60.9                                                              | MKYVSSDQSTSTR                                                 | 51.3 |               |       |           |                                                                                |                                           |                                                                                |               |       |    |      |                                    |      |                                    |      |
| MKYVSSDQSTSTR Oxidation (M1)                                  | 67.1                                                              | MKYVSSDQSTSTR Oxidation (M1)                                  | 50.7 |               |       |           |                                                                                |                                           |                                                                                |               |       |    |      |                                    |      |                                    |      |
| MNLFSHITECEK Oxidation (M2) Carbamidomethyl (C11)             | 54.7                                                              | MNLFSHITECEK Oxidation (M2) Carbamidomethyl (C11)             | 81.2 |               |       |           |                                                                                |                                           |                                                                                |               |       |    |      |                                    |      |                                    |      |
| MNLFSHITECEK Oxidation (M2) Carbamidomethyl (C11)             | 38.8                                                              | MNLFSHITECEK Oxidation (M2) Carbamidomethyl (C11)             | 23.7 |               |       |           |                                                                                |                                           |                                                                                |               |       |    |      |                                    |      |                                    |      |
| NTYGTGCLLMNVGEEAR Carbamidomethyl (C7) Oxidation (M11)        | 49.6                                                              | NTYGTGCLLMNVGEEAR Carbamidomethyl (C7) Oxidation (M11)        | 14.8 |               |       |           |                                                                                |                                           |                                                                                |               |       |    |      |                                    |      |                                    |      |
| SNSELFYVETDECGVAALNER Deamidated (N2) Carbamidomethyl (C14)   | 7.0                                                               | SNSELFYVETDECGVAALNER Deamidated (N2) Carbamidomethyl (C14)   | 51.7 |               |       |           |                                                                                |                                           |                                                                                |               |       |    |      |                                    |      |                                    |      |
| SNSELFYVETDECGVAALNER Deamidated (N2) Carbamidomethyl (C14)   | 26.0                                                              | SNSELFYVETDECGVAALNER Deamidated (N2) Carbamidomethyl (C14)   | 47.6 |               |       |           |                                                                                |                                           |                                                                                |               |       |    |      |                                    |      |                                    |      |



Peptides

| Accession | Gene          | Protein                                                                                            | Start | End            | Length                                              | Peptide | Score                                                 | Modifications | Peptide                     | Score                                                           | Modifications |                    |                                       |      |                                 |      |                             |                                                                       |      |                    |                                       |      |
|-----------|---------------|----------------------------------------------------------------------------------------------------|-------|----------------|-----------------------------------------------------|---------|-------------------------------------------------------|---------------|-----------------------------|-----------------------------------------------------------------|---------------|--------------------|---------------------------------------|------|---------------------------------|------|-----------------------------|-----------------------------------------------------------------------|------|--------------------|---------------------------------------|------|
| 20        | Tb927.5.1060  | mitochondrial processing peptidase, beta subunit, putative, metallo-peptidase, Clan ME, Family M16 | 1.00  | 1466           | 156                                                 | 26      | 24                                                    | 52.8          | AATSAFGDLQK                 | 33.0                                                            | 1.00          | 818                | 66                                    | 17   | 15                              | 36.6 | AATSAFGDLQK                 | 24.3                                                                  |      |                    |                                       |      |
|           |               |                                                                                                    |       |                |                                                     |         |                                                       |               |                             | AATSAFGDLQKGTVLGAPPEAR                                          | 62.9          |                    |                                       |      |                                 |      |                             | AATSAFGDLQKGTVLGAPPEAR                                                | 47.2 |                    |                                       |      |
|           |               |                                                                                                    |       |                |                                                     |         |                                                       |               |                             | AVSLADVVR                                                       | 51.0          |                    |                                       |      |                                 |      |                             | AVSLADVVR                                                             | 33.0 |                    |                                       |      |
|           |               |                                                                                                    |       |                |                                                     |         |                                                       |               |                             | AVSLADVVRNAR Deamidated (N11)                                   | 16.1          |                    |                                       |      |                                 |      |                             | AVSLADVVRNAR Deamidated (N11)                                         | 23.7 |                    |                                       |      |
|           |               |                                                                                                    |       |                |                                                     |         |                                                       |               |                             | CAFDSITHGPGTFLYGVETGTR Carbamidomethyl (C1)                     | 69.7          |                    |                                       |      |                                 |      |                             | EDTERAVSLADVVR                                                        | 12.1 |                    |                                       |      |
|           |               |                                                                                                    |       |                |                                                     |         |                                                       |               |                             | EDTERAVSLADVVR                                                  | 33.8          |                    |                                       |      |                                 |      |                             | FVGGYKLVNLR                                                           | 45.4 |                    |                                       |      |
|           |               |                                                                                                    |       |                |                                                     |         |                                                       |               |                             | FVGGYKLVNLR                                                     | 55.4          |                    |                                       |      |                                 |      |                             | GTVLGAPPEAR                                                           | 51.1 |                    |                                       |      |
|           |               |                                                                                                    |       |                |                                                     |         |                                                       |               |                             | GTVLGAPPEAR                                                     | 59.6          |                    |                                       |      |                                 |      |                             | IDVPTFNQEVLYQHYFYGR                                                   | 69.3 |                    |                                       |      |
|           |               |                                                                                                    |       |                |                                                     |         |                                                       |               |                             | HEPAQYAGTAR                                                     | 9.2           |                    |                                       |      |                                 |      |                             | ILHEGELAQAK                                                           | 42.6 |                    |                                       |      |
|           |               |                                                                                                    |       |                |                                                     |         |                                                       |               |                             | IDVPTFNQEVLYQHYFYGR                                             | 45.0          |                    |                                       |      |                                 |      |                             | IPPTTLSTVGSQVR                                                        | 47.3 |                    |                                       |      |
|           |               |                                                                                                    |       |                |                                                     |         |                                                       |               |                             | ILHEGELAQAK                                                     | 56.3          |                    |                                       |      |                                 |      |                             | RIPLEEMNAR                                                            | 14.8 |                    |                                       |      |
|           |               |                                                                                                    |       |                |                                                     |         |                                                       |               |                             | IPPTTLSTVGSQVR                                                  | 60.0          |                    |                                       |      |                                 |      |                             | TFSSLDHSTPTNTHFNEK                                                    | 33.5 |                    |                                       |      |
|           |               |                                                                                                    |       |                |                                                     |         |                                                       |               |                             | LLSNVLAKIPPTTLSTVGSQVR                                          | 52.8          |                    |                                       |      |                                 |      |                             | TFSSLDHSTPTNTHFNEK Deamidated (N12)                                   | 34.4 |                    |                                       |      |
|           |               |                                                                                                    |       |                |                                                     |         |                                                       |               |                             | LSDEDELVAK                                                      | 41.8          |                    |                                       |      |                                 |      |                             | VCEENPNSLAVTGVWLDAGTRHEPNQYAGTAR Carbamidomethyl (C2)                 | 56.3 |                    |                                       |      |
|           |               |                                                                                                    |       |                |                                                     |         |                                                       |               |                             | LSDEDEVWQMLR                                                    | 32.6          |                    |                                       |      |                                 |      |                             | VCEENPNSLAVTGVWLDAGTRHEPNQYAGTAR Carbamidomethyl (C2) Deamidated (N6) | 49.4 |                    |                                       |      |
|           |               |                                                                                                    |       |                |                                                     |         |                                                       |               |                             | QAVLRDQHFQEPDQDIDMNLHR Carbamidomethyl (C18); Oxidation (M19)   | 19.1          |                    |                                       |      |                                 |      |                             | VARETERAVSLADVVR                                                      | 23.7 |                    |                                       |      |
|           |               |                                                                                                    |       |                |                                                     |         |                                                       |               |                             | RIPLEEMNAR                                                      | 31.7          |                    |                                       |      |                                 |      |                             | VVVVSGAVNHTALER Deamidated (N10)                                      | 17.1 |                    |                                       |      |
|           |               |                                                                                                    |       |                |                                                     |         |                                                       |               |                             | SRPSSNHATK                                                      | 21.5          |                    |                                       |      |                                 |      |                             |                                                                       |      |                    |                                       |      |
|           |               |                                                                                                    |       |                |                                                     |         |                                                       |               |                             | SRPSSNHATKLLSNLAK                                               | 45.0          |                    |                                       |      |                                 |      |                             |                                                                       |      |                    |                                       |      |
|           |               |                                                                                                    |       |                |                                                     |         | SRPSSNHATKLLSNLAK Deamidated (N15)                    | 33.7          |                             |                                                                 |               |                    |                                       |      |                                 |      |                             |                                                                       |      |                    |                                       |      |
|           |               |                                                                                                    |       |                |                                                     |         | TFSSLDHSTPTNTHFNEK                                    | 45.6          |                             |                                                                 |               |                    |                                       |      |                                 |      |                             |                                                                       |      |                    |                                       |      |
|           |               |                                                                                                    |       |                |                                                     |         | VCEENPNSLAVTGVWLDAGTRHEPNQYAGTAR Carbamidomethyl (C3) | 79.9          |                             |                                                                 |               |                    |                                       |      |                                 |      |                             |                                                                       |      |                    |                                       |      |
|           |               |                                                                                                    |       |                |                                                     |         | VARETERAVSLADVVR                                      | 33.5          |                             |                                                                 |               |                    |                                       |      |                                 |      |                             |                                                                       |      |                    |                                       |      |
|           |               |                                                                                                    |       |                |                                                     |         | VKLTSSLDHSTPTNTHFNEK                                  | 37.8          |                             |                                                                 |               |                    |                                       |      |                                 |      |                             |                                                                       |      |                    |                                       |      |
|           |               |                                                                                                    |       |                |                                                     |         | VVVVSGAVNHTALER                                       | 70.7          |                             |                                                                 |               |                    |                                       |      |                                 |      |                             |                                                                       |      |                    |                                       |      |
|           |               |                                                                                                    |       |                |                                                     |         | VVVVSGAVNHTALER Deamidated (N10)                      | 46.7          |                             |                                                                 |               |                    |                                       |      |                                 |      |                             |                                                                       |      |                    |                                       |      |
| 21        | Tb927.11.5520 | triosephosphate isomerase                                                                          | 1.00  | 1196           | 128                                                 | 26      | 13                                                    | 47.2          | DVNGFLVGGASLKPEFVDIK        | 43.8                                                            | 1.00          | 1016               | 134                                   | 28   | 14                              | 51.2 | DVNGFLVGGASLKPEFVDIK        | 51.3                                                                  |      |                    |                                       |      |
|           |               |                                                                                                    |       |                |                                                     |         |                                                       |               |                             | DVNGFLVGGASLKPEFVDIK Deamidated (N3)                            | 44.8          |                    |                                       |      |                                 |      |                             | DVNGFLVGGASLKPEFVDIK Deamidated (N3)                                  | 47.7 |                    |                                       |      |
|           |               |                                                                                                    |       |                |                                                     |         |                                                       |               |                             | DVNGFLVGGASLKPEFVDIKATQ                                         | 38.9          |                    |                                       |      |                                 |      |                             | DVNGFLVGGASLKPEFVDIKATQ                                               | 39.9 |                    |                                       |      |
|           |               |                                                                                                    |       |                |                                                     |         |                                                       |               |                             | DVNGFLVGGASLKPEFVDIKATQ Deamidated (N3)                         | 38.8          |                    |                                       |      |                                 |      |                             | DVNGFLVGGASLKPEFVDIKATQ Deamidated (N3)                               | 32.3 |                    |                                       |      |
|           |               |                                                                                                    |       |                |                                                     |         |                                                       |               |                             | FVIAAQNAIK                                                      | 61.0          |                    |                                       |      |                                 |      |                             | FVIAAQNAIK                                                            | 47.8 |                    |                                       |      |
|           |               |                                                                                                    |       |                |                                                     |         |                                                       |               |                             | FVIAAQNAIK Deamidated (N7)                                      | 41.9          |                    |                                       |      |                                 |      |                             | FVIAAQNAIK Deamidated (G6)                                            | 57.2 |                    |                                       |      |
|           |               |                                                                                                    |       |                |                                                     |         |                                                       |               |                             | FVIAAQNAIK Deamidated (G6)                                      | 42.0          |                    |                                       |      |                                 |      |                             | IGADVAGELR                                                            | 77.9 |                    |                                       |      |
|           |               |                                                                                                    |       |                |                                                     |         |                                                       |               |                             | ILYGSVNGIK Deamidated (N8)                                      | 10.7          |                    |                                       |      |                                 |      |                             | ILYGSVNGIK Deamidated (N8)                                            | 23.6 |                    |                                       |      |
|           |               |                                                                                                    |       |                |                                                     |         |                                                       |               |                             | ILYGSVNGIKNAR Deamidated (N8)                                   | 15.0          |                    |                                       |      |                                 |      |                             | ILYGSVNGIKNAR                                                         | 66.1 |                    |                                       |      |
|           |               |                                                                                                    |       |                |                                                     |         |                                                       |               |                             | ILYGSVNGIKNAR Deamidated (N8); Deamidated (N11)                 | 41.7          |                    |                                       |      |                                 |      |                             | ILYGSVNGIKNAR Deamidated (N11)                                        | 46.8 |                    |                                       |      |
|           |               |                                                                                                    |       |                |                                                     |         |                                                       |               |                             | LSHPKFVIAAQNAIK                                                 | 49.3          |                    |                                       |      |                                 |      |                             | ILYGSVNGIKNAR Deamidated (N8)                                         | 43.0 |                    |                                       |      |
|           |               |                                                                                                    |       |                |                                                     |         |                                                       |               |                             | LSHPKFVIAAQNAIK Deamidated (N12)                                | 53.7          |                    |                                       |      |                                 |      |                             | ILYGSVNGIKNAR Deamidated (N8); Deamidated (N11)                       | 19.6 |                    |                                       |      |
|           |               |                                                                                                    |       |                |                                                     |         |                                                       |               |                             | SGAFTGEVLSPLKDFGVNVLGHSERR                                      | 11.2          |                    |                                       |      |                                 |      |                             | LSHPKFVIAAQNAIK                                                       | 43.4 |                    |                                       |      |
|           |               |                                                                                                    |       |                |                                                     |         |                                                       |               |                             | SGAFTGEVLSPLKDFGVNVLGHSERR                                      | 9.8           |                    |                                       |      |                                 |      |                             | LSHPKFVIAAQNAIK Deamidated (G11)                                      | 19.3 |                    |                                       |      |
|           |               |                                                                                                    |       |                |                                                     |         |                                                       |               |                             | TLYQQRDVNGLVGGASLKPEFVDIK                                       | 32.9          |                    |                                       |      |                                 |      |                             | SGAFTGEVLSPLKDFGVNVLGHSERR                                            | 40.3 |                    |                                       |      |
|           |               |                                                                                                    |       |                |                                                     |         |                                                       |               |                             | TLYQQRDVNGLVGGASLKPEFVDIK Deamidated (N9)                       | 42.1          |                    |                                       |      |                                 |      |                             | SGAFTGEVLSPLKDFGVNVLGHSERR                                            | 34.4 |                    |                                       |      |
|           |               |                                                                                                    |       |                |                                                     |         |                                                       |               |                             | TLYQQRDVNGLVGGASLKPEFVDIK Deamidated (G5)                       | 17.3          |                    |                                       |      |                                 |      |                             | TLYQQRDVNGLVGGASLKPEFVDIK                                             | 22.6 |                    |                                       |      |
|           |               |                                                                                                    |       |                |                                                     |         |                                                       |               |                             | TLYQQRDVNGLVGGASLKPEFVDIK Deamidated (G5); Deamidated (N6)      | 19.3          |                    |                                       |      |                                 |      |                             | TLYQQRDVNGLVGGASLKPEFVDIK Deamidated (N9)                             | 30.8 |                    |                                       |      |
|           |               |                                                                                                    |       |                |                                                     |         |                                                       |               |                             | TLYQQRDVNGLVGGASLKPEFVDIKATQ                                    | 48.3          |                    |                                       |      |                                 |      |                             | TLYQQRDVNGLVGGASLKPEFVDIK Deamidated (G5)                             | 42.4 |                    |                                       |      |
|           |               |                                                                                                    |       |                |                                                     |         |                                                       |               |                             | TLYQQRDVNGLVGGASLKPEFVDIKATQ Deamidated (N6)                    | 32.4          |                    |                                       |      |                                 |      |                             | TLYQQRDVNGLVGGASLKPEFVDIKATQ                                          | 60.0 |                    |                                       |      |
|           |               |                                                                                                    |       |                |                                                     |         |                                                       |               |                             | TLYQQRDVNGLVGGASLKPEFVDIKATQ Deamidated (G30)                   | 31.7          |                    |                                       |      |                                 |      |                             | TLYQQRDVNGLVGGASLKPEFVDIKATQ Deamidated (N9)                          | 32.3 |                    |                                       |      |
|           |               |                                                                                                    |       |                |                                                     |         |                                                       |               |                             | TLYQQRDVNGLVGGASLKPEFVDIKATQ Deamidated (G30); Deamidated (G30) | 33.3          |                    |                                       |      |                                 |      |                             | TLYQQRDVNGLVGGASLKPEFVDIKATQ Deamidated (G30)                         | 50.4 |                    |                                       |      |
|           |               |                                                                                                    |       |                |                                                     |         |                                                       |               |                             | WATPQQAQEAHALR                                                  | 54.3          |                    |                                       |      |                                 |      |                             | TLYQQRDVNGLVGGASLKPEFVDIKATQ Deamidated (G5); Deamidated (G30)        | 30.5 |                    |                                       |      |
|           |               |                                                                                                    |       |                |                                                     |         |                                                       |               |                             | WATPQQAQEAHALR Deamidated (G8)                                  | 19.0          |                    |                                       |      |                                 |      |                             | TLYQQRDVNGLVGGASLKPEFVDIKATQ Deamidated (G5); Deamidated (G30)        | 21.4 |                    |                                       |      |
|           |               |                                                                                                    |       |                |                                                     |         |                                                       |               |                             | VVAEYEPVWAGTQK                                                  | 53.1          |                    |                                       |      |                                 |      |                             | WATPQQAQEAHALR Deamidated (G6)                                        | 65.7 |                    |                                       |      |
|           |               |                                                                                                    |       |                |                                                     |         |                                                       |               |                             | VVAEYEPVWAGTQK Deamidated (G8)                                  | 23.0          |                    |                                       |      |                                 |      |                             | WATPQQAQEAHALR Deamidated (G8)                                        | 60.8 |                    |                                       |      |
|           |               |                                                                                                    |       |                |                                                     |         |                                                       |               |                             | VVAEYEPVWAGTQK Deamidated (G8); Deamidated (G30)                | 56.3          |                    |                                       |      |                                 |      |                             | WVAIEYEPVWAGTQK                                                       | 33.7 |                    |                                       |      |
|           |               |                                                                                                    |       |                |                                                     |         | VVAEYEPVWAGTQK Deamidated (G8); Deamidated (G30)      | 26.0          |                             |                                                                 |               |                    |                                       |      | WVAIEYEPVWAGTQK Deamidated (G8) | 48.3 |                             |                                                                       |      |                    |                                       |      |
| 22        | Tb927.4.2070  | antigenic protein, putative                                                                        | 1.00  | 1118           | 66                                                  | 25      | 13                                                    | 4.6           | ALNEQYETLQR Deamidated (G5) | 33.3                                                            | 1.00          | 221                | 14                                    | 6    | 4                               | 1.0  | ALNEQYETLQR Deamidated (G5) | 17.1                                                                  |      |                    |                                       |      |
|           |               |                                                                                                    |       |                |                                                     |         |                                                       |               |                             | ALNEQYETLQR                                                     | 49.3          |                    |                                       |      |                                 |      |                             | ALNEQYETLQR                                                           | 48.4 |                    |                                       |      |
|           |               |                                                                                                    |       |                |                                                     |         |                                                       |               |                             | AVNEQYETLQR                                                     | 45.7          |                    |                                       |      |                                 |      |                             | ALNEQYETLQR Deamidated (N3)                                           | 38.9 |                    |                                       |      |
|           |               |                                                                                                    |       |                |                                                     |         |                                                       |               |                             | TNAAMEELDSLRL Deamidated (N2); Oxidation (M5)                   | 44.8          |                    |                                       |      |                                 |      |                             | AVNEQYETLQR                                                           | 45.0 |                    |                                       |      |
|           |               |                                                                                                    |       |                |                                                     |         |                                                       |               |                             | TNAAMEELDSLRLRAINEQYETLQR Deamidated (N2); Oxidation (M5)       | 12.2          |                    |                                       |      |                                 |      |                             | TNAAMEELDSLRL                                                         | 19.9 |                    |                                       |      |
|           |               |                                                                                                    |       |                |                                                     |         |                                                       |               |                             | TNAAMEELDSLRLRAINEQYETLQR Oxidation (M5); Deamidated (G18)      | 41.8          |                    |                                       |      |                                 |      |                             | TNAAMEELDSLRL Deamidated (N2)                                         | 30.5 |                    |                                       |      |
|           |               |                                                                                                    |       |                |                                                     |         |                                                       |               |                             | TNAAMEELDSLRLRAINEQYETLQR                                       | 60.2          |                    |                                       |      |                                 |      |                             |                                                                       |      |                    |                                       |      |
|           |               |                                                                                                    |       |                |                                                     |         |                                                       |               |                             | TNAAMEELDSLRLRAINEQYETLQR Deamidated (N2)                       | 18.2          |                    |                                       |      |                                 |      |                             |                                                                       |      |                    |                                       |      |
|           |               |                                                                                                    |       |                |                                                     |         |                                                       |               |                             | TNAAMEELDSLRLRAINEQYETLQR Deamidated (N2); Oxidation (M5)       | 59.5          |                    |                                       |      |                                 |      |                             |                                                                       |      |                    |                                       |      |
|           |               |                                                                                                    |       |                |                                                     |         |                                                       |               |                             | TNAAMEELDSLRLRAINEQYETLQR Deamidated (N2); Deamidated (N2)      | 42.7          |                    |                                       |      |                                 |      |                             |                                                                       |      |                    |                                       |      |
|           |               |                                                                                                    |       |                |                                                     |         |                                                       |               |                             | TNAAMEELDSLRLRAINEQYETLQR Oxidation (M5)                        | 36.0          |                    |                                       |      |                                 |      |                             |                                                                       |      |                    |                                       |      |
|           |               |                                                                                                    |       |                |                                                     |         |                                                       |               |                             | TNAAMEELDSLRLRAINEQYETLQR Oxidation (M5); Deamidated (G18)      | 33.6          |                    |                                       |      |                                 |      |                             |                                                                       |      |                    |                                       |      |
|           |               |                                                                                                    |       |                |                                                     |         |                                                       |               |                             | TNAAMEELDSLRLRAINEQYETLQR                                       | 17.7          |                    |                                       |      |                                 |      |                             |                                                                       |      |                    |                                       |      |
|           |               |                                                                                                    |       |                |                                                     |         |                                                       |               |                             | TNAAMEELDSLRLRAINEQYETLQR Deamidated (N2)                       | 22.6          |                    |                                       |      |                                 |      |                             |                                                                       |      |                    |                                       |      |
|           |               |                                                                                                    |       |                |                                                     |         |                                                       |               |                             | TNAAMEELDSLRLRAINEQYETLQR Deamidated (N2); Oxidation (M5)       | 32.3          |                    |                                       |      |                                 |      |                             |                                                                       |      |                    |                                       |      |
|           |               |                                                                                                    |       |                |                                                     |         |                                                       |               |                             | TNAAMEELDSLRLRAINEQYETLQR Oxidation (M5)                        | 39.2          |                    |                                       |      |                                 |      |                             |                                                                       |      |                    |                                       |      |
|           |               |                                                                                                    |       |                |                                                     |         |                                                       |               |                             | TNAAMEELDSLRL Deamidated (N2); Oxidation (M5)                   | 26.4          |                    |                                       |      |                                 |      |                             |                                                                       |      |                    |                                       |      |
|           |               |                                                                                                    |       |                |                                                     |         |                                                       |               |                             | TNAAMEELDSLRLRAINEQYETLQR Oxidation (M5)                        | 28.6          |                    |                                       |      |                                 |      |                             |                                                                       |      |                    |                                       |      |
|           |               |                                                                                                    |       |                |                                                     |         |                                                       |               |                             | TNAAMEELDSLRLRAINEQYETLQR                                       | 57.2          |                    |                                       |      |                                 |      |                             |                                                                       |      |                    |                                       |      |
|           |               |                                                                                                    |       |                |                                                     |         |                                                       |               |                             | TNAAMEELDSLRLRAINEQYETLQR Deamidated (N2)                       | 27.8          |                    |                                       |      |                                 |      |                             |                                                                       |      |                    |                                       |      |
|           |               |                                                                                                    |       |                |                                                     |         |                                                       |               |                             | TNAAMEELDSLRLRAINEQYETLQR Deamidated (G23)                      | 39.7          |                    |                                       |      |                                 |      |                             |                                                                       |      |                    |                                       |      |
|           |               |                                                                                                    |       |                |                                                     |         |                                                       |               |                             | TNAAMEELDSLRLRAINEQYETLQR Oxidation (M5)                        | 29.7          |                    |                                       |      |                                 |      |                             |                                                                       |      |                    |                                       |      |
|           |               |                                                                                                    |       |                |                                                     |         |                                                       |               |                             | TNAAMEELDSLRLRAINEQYETLQR                                       | 14.3          |                    |                                       |      |                                 |      |                             |                                                                       |      |                    |                                       |      |
|           |               |                                                                                                    |       |                |                                                     |         |                                                       |               |                             | TNAAMEELDSLRLRAINEQYETLQR Deamidated (N2)                       | 28.7          |                    |                                       |      |                                 |      |                             |                                                                       |      |                    |                                       |      |
|           |               |                                                                                                    |       |                |                                                     |         |                                                       |               |                             | TNAAMEELDSLRLRAINEQYETLQR                                       | 49.3          |                    |                                       |      |                                 |      |                             |                                                                       |      |                    |                                       |      |
|           |               |                                                                                                    | 23    | Tb927.11.11880 | 2-oxoglutarate dehydrogenase E2 component, putative | 1.00    | 1416                                                  | 89            | 29                          | 21                                                              | 43.1          | AETADKPKQNAFAAAPPK | 26.7                                  | 1.00 | 633                             | 38   | 17                          | 13                                                                    | 31.6 | AETADKPKQNAFAAAPPK | 1.9                                   |      |
|           |               |                                                                                                    |       |                |                                                     |         |                                                       |               |                             |                                                                 |               |                    | AETADKPKQNAFAAAPPK                    | 78.0 |                                 |      |                             |                                                                       |      |                    | ASPTAAPPKPAFAAAPPVTSR                 | 35.8 |
|           |               |                                                                                                    |       |                |                                                     |         |                                                       |               |                             |                                                                 |               |                    | APRAGVYIK                             | 30.9 |                                 |      |                             |                                                                       |      |                    | DIMAAVLYDHR                           | 54.2 |
|           |               |                                                                                                    |       |                |                                                     |         |                                                       |               |                             |                                                                 |               |                    | ASPTAAPPKPAFAAAPPVTSR                 | 46.9 |                                 |      |                             |                                                                       |      |                    | DVQNSNFAGIEK                          | 49.6 |
|           |               |                                                                                                    |       |                |                                                     |         |                                                       |               |                             |                                                                 |               |                    | DIMAAVLYDHR Oxidation (M3)            | 53.4 |                                 |      |                             |                                                                       |      |                    | DVQNSNFAGIEKQIADFGER                  | 16.9 |
|           |               |                                                                                                    |       |                |                                                     |         |                                                       |               |                             |                                                                 |               |                    | DIMAAVLYDHRLDGSDAVFLVK Oxidation (M3) | 27.1 |                                 |      |                             |                                                                       |      |                    | GLVVPVLRDVQNSNFAGIEK                  | 36.7 |
|           |               |                                                                                                    |       |                |                                                     |         |                                                       |               |                             |                                                                 |               |                    | DVQNSNFAGIEK                          | 61.5 |                                 |      |                             |                                                                       |      |                    | GLVVPVLRDVQNSNFAGIEK Deamidated (N14) | 22.0 |
|           |               |                                                                                                    |       |                |                                                     |         |                                                       |               |                             |                                                                 |               |                    | DVQNSNFAGIEKQIADFGER                  | 65.3 |                                 |      |                             |                                                                       |      |                    | GLVVPVLRDVQNSNFAGIEK Deamidated (G17) | 22.2 |
|           |               |                                                                                                    |       |                |                                                     |         |                                                       |               |                             | DVQNSNFAGIEKQIADFGER Deamidated (N6)                            | 41.6          |                    |                                       |      |                                 |      |                             | GLVVPVLRDVQNSNFAGIEKQIADFGER                                          | 23.0 |                    |                                       |      |
|           |               |                                                                                                    |       |                |                                                     |         |                                                       |               |                             | GLVVPVLRDVQNSNFAGIEK                                            | 66.9          |                    |                                       |      |                                 |      |                             | GLVVPVLRDVQNSNFAGIEKQIADFGER Deamidated (N12); Deamidated (N14)       | 11.2 |                    |                                       |      |
|           |               |                                                                                                    |       |                |                                                     |         |                                                       |               |                             | GLVVPVLRDVQNSNFAGIEK Deamidated (N12)                           | 44.1          |                    |                                       |      |                                 |      |                             | RLDLA                                                                 | 19.7 |                    |                                       |      |
|           |               |                                                                                                    |       |                |                                                     |         |                                                       |               |                             | GLVVPVLRDVQNSNFAGIEK Deamidated (N14)                           | 43.8          |                    |                                       |      |                                 |      |                             | KKPVVVGNVSVPR Deamidated (N8)                                         | 13.2 |                    |                                       |      |
|           |               |                                                                                                    |       |                |                                                     |         |                                                       |               |                             | GLVVPVLRDVQNSNFAGIEKQIADFGER                                    | 32.9          |                    |                                       |      |                                 |      |                             | LDGSDAVFLVK                                                           | 57.9 |                    |                                       |      |
|           |               |                                                                                                    |       |                |                                                     |         |                                                       |               |                             | GLVVPVLRDVQNSNFAGIEKQIADFGER Deamidated (N12)                   | 31.0          |                    |                                       |      |                                 |      |                             | NLEDIPARVLDLA                                                         | 49.6 |                    |                                       |      |
|           |               |                                                                                                    |       |                |                                                     |         |                                                       |               |                             | GLVVPVLRDVQNSNFAGIEKQIADFGER Deamidated (N12); Deamidated (N14) | 39.9          |                    |                                       |      |                                 |      |                             | QNAFAAAPPKASPTAAPPKPAFAAAPPVTSR                                       | 35.4 |                    |                                       |      |



Peptides

| Index                                                          | Accession     | Protein Name                                                                      | Start | End  | Score | Modifications | Peptide Sequence | Score | Modifications                                                                                                 | Peptide Sequence |      |      |    |    |    |      |                                                                                                                                 |       |
|----------------------------------------------------------------|---------------|-----------------------------------------------------------------------------------|-------|------|-------|---------------|------------------|-------|---------------------------------------------------------------------------------------------------------------|------------------|------|------|----|----|----|------|---------------------------------------------------------------------------------------------------------------------------------|-------|
| 29                                                             | Tb927.9.5320  | nucleolar RNA binding protein, putative                                           | 1.00  | 953  | 47    | 19            | 13               | 28.9  | MTGAGLRRESGSHVAKL Oxidation (M1)                                                                              | 25.0             | 1.00 | 704  | 26 | 12 | 9  | 28.6 | AIKDALAQCVHGGDTLATFR Carbamidomethyl (C10)                                                                                      | 48.1  |
|                                                                |               |                                                                                   |       |      |       |               |                  |       | RAQSFLEIPR                                                                                                    | 26.0             |      |      |    |    |    |      | AIKDALAQCVHGGDTLATFR Deamidated (D9)- Carbamidomethyl (C10)                                                                     | 42.0  |
|                                                                |               |                                                                                   |       |      |       |               |                  |       | RRRQVQADGELR Carbamidomethyl (C6)                                                                             | 39.6             |      |      |    |    |    |      | ALRANLLEDVSTEGNLQALGLAHNLNR                                                                                                     | 75.6  |
|                                                                |               |                                                                                   |       |      |       |               |                  |       | TASVDIAGNIASAEAEALDAGADLQVGVGSGICTR Carbamidomethyl (C38)                                                     | 34.8             |      |      |    |    |    |      | ANLDDLEDVSTEGNLQALGLAHNLNR                                                                                                      | 100.7 |
|                                                                |               |                                                                                   |       |      |       |               |                  |       | TQDEDVSSLLVPEGVGACKVGPVIVR Carbamidomethyl (C21)                                                              | 57.5             |      |      |    |    |    |      | ANLDDLEDVSTEGNLQALGLAHNLNR Deamidated (Q17)                                                                                     | 67.1  |
|                                                                |               |                                                                                   |       |      |       |               |                  |       | AGSLLSLAKYPSSTLQLGAEK                                                                                         | 29.3             |      |      |    |    |    |      | ANLDDLEDVSTEGNLQALGLAHNLNR Deamidated (N2)                                                                                      | 60.9  |
|                                                                |               |                                                                                   |       |      |       |               |                  |       | AIKDALAQCVHGGDTLATFR Carbamidomethyl (C10)                                                                    | 27.9             |      |      |    |    |    |      | LRQFEEVTVGR                                                                                                                     | 41.5  |
|                                                                |               |                                                                                   |       |      |       |               |                  |       | AIKDALAQCVHGGDTLATFR Deamidated (D9)- Carbamidomethyl (C10)                                                   | 52.4             |      |      |    |    |    |      | NFVEKQTEELAVADAK                                                                                                                | 42.9  |
|                                                                |               |                                                                                   |       |      |       |               |                  |       | ALRANLLEDVSTEGNLQALGLAHNLNR                                                                                   | 51.8             |      |      |    |    |    |      | RGPPNGGGGAPFKR Deamidated (N5)- Deamidated (N7)                                                                                 | 18.9  |
|                                                                |               |                                                                                   |       |      |       |               |                  |       | ANLDDLEDVSTEGNLQALGLAHNLNR                                                                                    | 66.5             |      |      |    |    |    |      | RGPPNGGGGAPFKR Deamidated (N7)                                                                                                  | 42.2  |
|                                                                |               |                                                                                   |       |      |       |               |                  |       | ANLDDLEDVSTEGNLQALGLAHNLNRK                                                                                   | 45.8             |      |      |    |    |    |      | STADALATTTQVWNGELAKPKRK                                                                                                         | 31.9  |
|                                                                |               |                                                                                   |       |      |       |               |                  |       | ANLDDLEDVSTEGNLQALGLAHNLNRK Deamidated (G14)                                                                  | 32.0             |      |      |    |    |    |      | YPSSTLQLGAEK                                                                                                                    | 47.5  |
|                                                                |               |                                                                                   |       |      |       |               |                  |       | GPNGNGGGAPFKR Deamidated (N4)                                                                                 | 21.4             |      |      |    |    |    |      |                                                                                                                                 |       |
|                                                                |               |                                                                                   |       |      |       |               |                  |       | GPNGNGGGAPFKR Deamidated (N6)                                                                                 | 28.8             |      |      |    |    |    |      |                                                                                                                                 |       |
|                                                                |               |                                                                                   |       |      |       |               |                  |       | LQKAGSLLSLAK                                                                                                  | 52.0             |      |      |    |    |    |      |                                                                                                                                 |       |
| LQKAGSLLSLAKYPSSTLQLGAEK                                       | 22.2          |                                                                                   |       |      |       |               |                  |       |                                                                                                               |                  |      |      |    |    |    |      |                                                                                                                                 |       |
| LRQFEEVTVGR                                                    | 55.5          |                                                                                   |       |      |       |               |                  |       |                                                                                                               |                  |      |      |    |    |    |      |                                                                                                                                 |       |
| QTEELAVADAKLAK                                                 | 41.0          |                                                                                   |       |      |       |               |                  |       |                                                                                                               |                  |      |      |    |    |    |      |                                                                                                                                 |       |
| RGPPNGGGGAPFKR Deamidated (N5)                                 | 22.7          |                                                                                   |       |      |       |               |                  |       |                                                                                                               |                  |      |      |    |    |    |      |                                                                                                                                 |       |
| RGPPNGGGGAPFKR Deamidated (N6)- Deamidated (N7)                | 29.5          |                                                                                   |       |      |       |               |                  |       |                                                                                                               |                  |      |      |    |    |    |      |                                                                                                                                 |       |
| RGPPNGGGGAPFKR Deamidated (N7)                                 | 33.7          |                                                                                   |       |      |       |               |                  |       |                                                                                                               |                  |      |      |    |    |    |      |                                                                                                                                 |       |
| STADALATTTQVWNGELAKPKRK                                        | 55.6          |                                                                                   |       |      |       |               |                  |       |                                                                                                               |                  |      |      |    |    |    |      |                                                                                                                                 |       |
| STADALATTTQVWNGELAKPKRK Deamidated (N14)                       | 58.7          |                                                                                   |       |      |       |               |                  |       |                                                                                                               |                  |      |      |    |    |    |      |                                                                                                                                 |       |
| YPSSTLQLGAEK                                                   | 31.1          |                                                                                   |       |      |       |               |                  |       |                                                                                                               |                  |      |      |    |    |    |      |                                                                                                                                 |       |
| 30                                                             | Tb927.8.2770  | inositol 1,4,5-trisphosphate receptor                                             | 1.00  | 636  | 71    | 18            | 15               | 8.4   | EAVSALAR                                                                                                      | 14.3             | 1.00 | 1308 | 97 | 26 | 22 | 12.9 | ALLVFDGKHQR                                                                                                                     | 36.7  |
|                                                                |               |                                                                                   |       |      |       |               |                  |       | GVVVPVNSAHEFTR                                                                                                | 45.6             |      |      |    |    |    |      | ALVIVVER                                                                                                                        | 13.4  |
|                                                                |               |                                                                                   |       |      |       |               |                  |       | GSNVGTGYALLPVCACQR Carbamidomethyl (C16)- Carbamidomethyl (C18)                                               | 1.5              |      |      |    |    |    |      | APNSNPLSDGVSNSYDQVTFQGLFVLVHWSR                                                                                                 | 74.6  |
|                                                                |               |                                                                                   |       |      |       |               |                  |       | LHWALPSEPERDPCAR Carbamidomethyl (C17)                                                                        | 8.3              |      |      |    |    |    |      | GVVVPVNSAHEFTR                                                                                                                  | 55.4  |
|                                                                |               |                                                                                   |       |      |       |               |                  |       | LHWASANSVTDFTVR                                                                                               | 2.8              |      |      |    |    |    |      | GVVVPVNSAHEFTR Deamidated (N6)                                                                                                  | 17.9  |
|                                                                |               |                                                                                   |       |      |       |               |                  |       | LQTFSSDLGATR                                                                                                  | 57.4             |      |      |    |    |    |      | GSNVGTGYALLPVCACQR Carbamidomethyl (C16)- Carbamidomethyl (C18)                                                                 | 47.9  |
|                                                                |               |                                                                                   |       |      |       |               |                  |       | LVLAPGEEQTCQGFITPR Carbamidomethyl (C14)                                                                      | 33.2             |      |      |    |    |    |      | HVSAENSSVTDFTVR                                                                                                                 | 79.7  |
|                                                                |               |                                                                                   |       |      |       |               |                  |       | LVLKELAVR                                                                                                     | 32.9             |      |      |    |    |    |      | KGPSYDQVWAGSAVTLQSGTKDVAFLDYVK                                                                                                  | 54.8  |
|                                                                |               |                                                                                   |       |      |       |               |                  |       | MALSAVGAPEVNSEAK                                                                                              | 23.4             |      |      |    |    |    |      | LGHWTK                                                                                                                          | 65.8  |
|                                                                |               |                                                                                   |       |      |       |               |                  |       | MALSAVGAPEVNSEAK Oxidation (M1)                                                                               | 57.3             |      |      |    |    |    |      | LHWALPSEPERDPCAR Carbamidomethyl (C17)                                                                                          | 12.5  |
|                                                                |               |                                                                                   |       |      |       |               |                  |       | MALSAVGAPEVNSEAK Oxidation (M1)- Deamidated (N13)                                                             | 69.7             |      |      |    |    |    |      | LHWASANSVTDFTVR                                                                                                                 | 86.4  |
|                                                                |               |                                                                                   |       |      |       |               |                  |       | MLTNLTPRPSLSLK Oxidation (M1)                                                                                 | 10.7             |      |      |    |    |    |      | LQTFSSDLGATR                                                                                                                    | 61.9  |
|                                                                |               |                                                                                   |       |      |       |               |                  |       | MLTNLTPRPSLSLKV Oxidation (M1)                                                                                | 39.3             |      |      |    |    |    |      | LVLAPGEEQTCQGFITPR Carbamidomethyl (C14)                                                                                        | 47.3  |
|                                                                |               |                                                                                   |       |      |       |               |                  |       | KNELSDDAEPLPLFGFETSVQILPPTVAK                                                                                 | 24.0             |      |      |    |    |    |      | MALSAVGAPEVNSEAK                                                                                                                | 56.9  |
|                                                                |               |                                                                                   |       |      |       |               |                  |       | KNELSDDAEPLPLFGFETSVQILPPTVAK Deamidated (G23)                                                                | 13.4             |      |      |    |    |    |      | MALSAVGAPEVNSEAK Oxidation (M1)                                                                                                 | 17.9  |
| RADVSTGDPFVTSPTERDALLWHK                                       | 9.3           | MALSAVGAPEVNSEAK Oxidation (M1)- Deamidated (N13)                                 | 46.0  |      |       |               |                  |       |                                                                                                               |                  |      |      |    |    |    |      |                                                                                                                                 |       |
| SALPVTHLELTSYGTSTYPLVEVPRPR                                    | 9.9           | MLTNLTPRPSLSLK Oxidation (M1)                                                     | 48.0  |      |       |               |                  |       |                                                                                                               |                  |      |      |    |    |    |      |                                                                                                                                 |       |
| SFETYAKENAGR                                                   | 52.9          | KNELSDDAEPLPLFGFETSVQILPPTVAK                                                     | 34.8  |      |       |               |                  |       |                                                                                                               |                  |      |      |    |    |    |      |                                                                                                                                 |       |
|                                                                |               | KNELSDDAEPLPLFGFETSVQILPPTVAK Deamidated (G23)                                    | 23.8  |      |       |               |                  |       |                                                                                                               |                  |      |      |    |    |    |      |                                                                                                                                 |       |
|                                                                |               | RADVSTGDPFVTSPTER                                                                 | 30.7  |      |       |               |                  |       |                                                                                                               |                  |      |      |    |    |    |      |                                                                                                                                 |       |
|                                                                |               | RADVSTGDPFVTSPTERDALLWHK                                                          | 28.6  |      |       |               |                  |       |                                                                                                               |                  |      |      |    |    |    |      |                                                                                                                                 |       |
|                                                                |               | SALPVTHLELTSYGTSTYPLVEVPRPR                                                       | 52.6  |      |       |               |                  |       |                                                                                                               |                  |      |      |    |    |    |      |                                                                                                                                 |       |
|                                                                |               | SFETYAKENAGR                                                                      | 52.6  |      |       |               |                  |       |                                                                                                               |                  |      |      |    |    |    |      |                                                                                                                                 |       |
|                                                                |               | SLVNRDLQITMEDSTLGEPAQIMNALLSCR Carbamidomethyl (C31)                              | 33.0  |      |       |               |                  |       |                                                                                                               |                  |      |      |    |    |    |      |                                                                                                                                 |       |
|                                                                |               | VAAEGLSKGNR                                                                       | 35.2  |      |       |               |                  |       |                                                                                                               |                  |      |      |    |    |    |      |                                                                                                                                 |       |
|                                                                |               | YDEGIAALHPDGEFATK                                                                 | 27.5  |      |       |               |                  |       |                                                                                                               |                  |      |      |    |    |    |      |                                                                                                                                 |       |
| 31                                                             | Tb927.10.3210 | delta-1-pyrroline-5-carboxylate dehydrogenase, putative                           | 1.00  | 827  | 69    | 19            | 14               | 31.4  | AIRDATEHLR                                                                                                    | 21.2             | 1.00 | 650  | 33 | 16 | 11 | 24.6 | AAFLHAAHLSTK                                                                                                                    | 57.6  |
|                                                                |               |                                                                                   |       |      |       |               |                  |       | ASSNDKPSGSAFLTR                                                                                               | 56.6             |      |      |    |    |    |      | ADTALGAAK                                                                                                                       | 31.7  |
|                                                                |               |                                                                                   |       |      |       |               |                  |       | ASSNDKPSGSAFLTR Deamidated (N5)                                                                               | 58.5             |      |      |    |    |    |      | CTGMVGGQPFQGAR Carbamidomethyl (C1)                                                                                             | 62.8  |
|                                                                |               |                                                                                   |       |      |       |               |                  |       | CGATDPIVGGKEVYR Carbamidomethyl (C1)- Carbamidomethyl (C6)                                                    | 25.0             |      |      |    |    |    |      | GLEAQR Carbamidomethyl (C6)                                                                                                     | 21.4  |
|                                                                |               |                                                                                   |       |      |       |               |                  |       | CGATDPIVGGKEVYRDNAINR Carbamidomethyl (C1)- Carbamidomethyl (C6)                                              | 44.3             |      |      |    |    |    |      | GYNATPELAK Deamidated (N3)                                                                                                      | 28.3  |
|                                                                |               |                                                                                   |       |      |       |               |                  |       | GAFEYQKQCSATSR Carbamidomethyl (C10)                                                                          | 49.3             |      |      |    |    |    |      | MIPSSHQDQVAK                                                                                                                    | 39.1  |
|                                                                |               |                                                                                   |       |      |       |               |                  |       | GTLCAQR Carbamidomethyl (C6)                                                                                  | 24.9             |      |      |    |    |    |      | MIPSSHQDQVAK Oxidation (M1)                                                                                                     | 31.2  |
|                                                                |               |                                                                                   |       |      |       |               |                  |       | GYNATPELAK                                                                                                    | 57.1             |      |      |    |    |    |      | SPVWNERMDSFQPGSDAR Oxidation (M9)                                                                                               | 9.7   |
|                                                                |               |                                                                                   |       |      |       |               |                  |       | LRCGATDPIVGGK Carbamidomethyl (C3)- Carbamidomethyl (C8)                                                      | 35.7             |      |      |    |    |    |      | TIKENFDHSAQVSYPHQLPDPVTL                                                                                                        | 23.2  |
|                                                                |               |                                                                                   |       |      |       |               |                  |       | MIPSSHQDQVAK                                                                                                  | 28.9             |      |      |    |    |    |      | TIKENFDHSAQVSYPHQLPDPVTL Deamidated (Q17)                                                                                       | 4.3   |
|                                                                |               |                                                                                   |       |      |       |               |                  |       | MIPSSHQDQVAK Oxidation (M1)                                                                                   | 25.4             |      |      |    |    |    |      | YAAGNYNDKCTGAVGGQPFQGAR Carbamidomethyl (C12)                                                                                   | 34.9  |
|                                                                |               |                                                                                   |       |      |       |               |                  |       | MIPSSHQDQVAK Oxidation (M1)                                                                                   | 13.2             |      |      |    |    |    |      | YAAGNYNDKCTGAVGGQPFQGAR Deamidated (N6)- Carbamidomethyl (C12)                                                                  | 25.9  |
|                                                                |               |                                                                                   |       |      |       |               |                  |       | MTALTYRGAFYQKQCSATSR Carbamidomethyl (C18)                                                                    | 35.6             |      |      |    |    |    |      | YAAGNYNDKCTGAVGGQPFQGAR Deamidated (Q19)- Deamidated (N5)- Carbamidomethyl (C12)                                                | 55.0  |
|                                                                |               |                                                                                   |       |      |       |               |                  |       | SPVWNERMDSFQPGSDAR Oxidation (M9)                                                                             | 24.9             |      |      |    |    |    |      | YAAGNYNDKCTGAVGGQPFQGAR Deamidated (Q19)- Deamidated (N5)- Carbamidomethyl (C12)                                                | 31.1  |
|                                                                |               |                                                                                   |       |      |       |               |                  |       | TIKENFDHSAQVSYPHQLPDPVTL                                                                                      | 29.6             |      |      |    |    |    |      | YALTGSIFAQDR                                                                                                                    | 71.2  |
| YAAGNYNDKCTGAVGGQPFQGAR Carbamidomethyl (C12)                  | 42.5          | YALTGSIFAQDRK                                                                     | 75.7  |      |       |               |                  |       |                                                                                                               |                  |      |      |    |    |    |      |                                                                                                                                 |       |
| YAAGNYNDKCTGAVGGQPFQGAR Deamidated (C19)                       | 42.8          |                                                                                   |       |      |       |               |                  |       |                                                                                                               |                  |      |      |    |    |    |      |                                                                                                                                 |       |
| YAAGNYNDKCTGAVGGQPFQGAR Deamidated (N5)- Carbamidomethyl (C12) | 38.1          |                                                                                   |       |      |       |               |                  |       |                                                                                                               |                  |      |      |    |    |    |      |                                                                                                                                 |       |
| YAAGNYNDKCTGAVGGQPFQGAR Deamidated (N6)- Carbamidomethyl (C12) | 38.9          |                                                                                   |       |      |       |               |                  |       |                                                                                                               |                  |      |      |    |    |    |      |                                                                                                                                 |       |
| 32                                                             | Tb927.11.1020 | ribokinase, putative                                                              | 1.00  | 1213 | 62    | 20            | 10               | 39.3  | ANMAAISVQRPTGSSYPTLDELPAEVEKIKI Carbamidomethyl (C31)                                                         | 75.1             | 1.00 | 1270 | 94 | 21 | 10 | 38.9 | ANMAAISVQRPTGSSYPTLDELPAEVEKIKI Carbamidomethyl (C31)                                                                           | 62.7  |
|                                                                |               |                                                                                   |       |      |       |               |                  |       | ANMAAISVQRPTGSSYPTLDELPAEVEKIKI Deamidated (Q10)- Carbamidomethyl (C31)                                       | 56.4             |      |      |    |    |    |      | ANMAAISVQRPTGSSYPTLDELPAEVEKIKI Deamidated (Q10)- Carbamidomethyl (C31)                                                         | 62.7  |
|                                                                |               |                                                                                   |       |      |       |               |                  |       | ANMAAISVQRPTGSSYPTLDELPAEVEKIKI Oxidation (M3)- Carbamidomethyl (C31)                                         | 48.9             |      |      |    |    |    |      | ANMAAISVQRPTGSSYPTLDELPAEVEKIKI Deamidated (Q15)- Carbamidomethyl (C31)                                                         | 62.0  |
|                                                                |               |                                                                                   |       |      |       |               |                  |       | ANMAAISVQRPTGSSYPTLDELPAEVEKIKI Oxidation (M3)- Deamidated (Q15)- Carbamidomethyl (C31)                       | 45.3             |      |      |    |    |    |      | ANMAAISVQRPTGSSYPTLDELPAEVEKIKI Deamidated (Q16)- Deamidated (N2)- Oxidation (M3)- Carbamidomethyl (C31)                        | 6.3   |
|                                                                |               |                                                                                   |       |      |       |               |                  |       | GFSGKSNQAVCAGR Carbamidomethyl (C12)                                                                          | 69.6             |      |      |    |    |    |      | ANMAAISVQRPTGSSYPTLDELPAEVEKIKI Oxidation (M3)- Carbamidomethyl (C31)                                                           | 59.5  |
|                                                                |               |                                                                                   |       |      |       |               |                  |       | GKPRRHLPSTVYK                                                                                                 | 25.2             |      |      |    |    |    |      | GFSGKSNQAVCAGR Carbamidomethyl (C12)                                                                                            | 67.2  |
|                                                                |               |                                                                                   |       |      |       |               |                  |       | KQSDNYNFFGPK                                                                                                  | 63.4             |      |      |    |    |    |      | KQSDNYNFFGPK                                                                                                                    | 61.6  |
|                                                                |               |                                                                                   |       |      |       |               |                  |       | KQSDNYNFFGPK Deamidated (N7)                                                                                  | 59.2             |      |      |    |    |    |      | KQSDNYNFFGPK Deamidated (N5)                                                                                                    | 57.0  |
|                                                                |               |                                                                                   |       |      |       |               |                  |       | KQSDNYNFFGPK Deamidated (Q2)                                                                                  | 10.5             |      |      |    |    |    |      | KQSDNYNFFGPK Deamidated (Q2)- Deamidated (N5)                                                                                   | 32.4  |
|                                                                |               |                                                                                   |       |      |       |               |                  |       | LGHSVVTLLGGNGYVGEK                                                                                            | 80.0             |      |      |    |    |    |      | LGHSVVTLLGGNGYVGEK                                                                                                              | 51.3  |
|                                                                |               |                                                                                   |       |      |       |               |                  |       | LGHSVVTLLGGNGYVGEK Deamidated (N13)                                                                           | 61.0             |      |      |    |    |    |      | LGHSVVTLLGGNGYVGEK Deamidated (N13)                                                                                             | 48.9  |
|                                                                |               |                                                                                   |       |      |       |               |                  |       | LGHSVVTLLGGNGYVGEKQKPRR                                                                                       | 82.0             |      |      |    |    |    |      | LGHSVVTLLGGNGYVGEKQKPRR                                                                                                         | 71.0  |
|                                                                |               |                                                                                   |       |      |       |               |                  |       | LGHSVVTLLGGNGYVGEKQKPRR Deamidated (N13)                                                                      | 67.8             |      |      |    |    |    |      | LGHSVVTLLGGNGYVGEKQKPRR Deamidated (N13)                                                                                        | 57.5  |
|                                                                |               |                                                                                   |       |      |       |               |                  |       | NGVQVSNVYR                                                                                                    | 39.0             |      |      |    |    |    |      | NGVQVSNVYR Deamidated (N1)                                                                                                      | 59.7  |
|                                                                |               |                                                                                   |       |      |       |               |                  |       | NGVQVSNVYR Deamidated (N1)                                                                                    | 38.8             |      |      |    |    |    |      | QSDNYNFFGPK                                                                                                                     | 20.8  |
| NGVQVSNVYR Deamidated (Q4)                                     | 50.0          | QSDNYNFFGPK Deamidated (N4)- Deamidated (N6)- Deamidated (N7)                     | 47.0  |      |       |               |                  |       |                                                                                                               |                  |      |      |    |    |    |      |                                                                                                                                 |       |
| QSDNYNFFGPK                                                    | 47.8          | SFSKGFQKSNQAVCAGR Carbamidomethyl (C16)                                           | 21.7  |      |       |               |                  |       |                                                                                                               |                  |      |      |    |    |    |      |                                                                                                                                 |       |
| SFSKGFQKSNQAVCAGR Carbamidomethyl (C16)                        | 47.2          | YILQNEPVETLLDLKKAHTR                                                              | 44.5  |      |       |               |                  |       |                                                                                                               |                  |      |      |    |    |    |      |                                                                                                                                 |       |
| YILQNEPVETLLDLKKAHTR                                           | 32.2          | YILQNEPVETLLDLKKAHTR Deamidated (Q5)                                              | 48.7  |      |       |               |                  |       |                                                                                                               |                  |      |      |    |    |    |      |                                                                                                                                 |       |
| YILQNEPVETLLDLKKAHTR Deamidated (Q5)                           | 29.8          | YILQNEPVETLLDLKKAHTR                                                              | 43.3  |      |       |               |                  |       |                                                                                                               |                  |      |      |    |    |    |      |                                                                                                                                 |       |
|                                                                |               | YILQNEPVETLLDLKKAHTR Deamidated (Q5)                                              | 30.0  |      |       |               |                  |       |                                                                                                               |                  |      |      |    |    |    |      |                                                                                                                                 |       |
| 33                                                             | Tb927.11.2690 | succinyl-coA:3-ketoadid-coenzyme A transferase, mitochondrial precursor, putative | 1.00  | 583  | 20    | 9             | 4                | 13.8  | GPFGAMDVLSGTR Oxidation (M6)- Carbamidomethyl (C11)                                                           | 69.7             | 1.00 | 766  | 21 | 12 | 6  | 17.2 | GPFGAMDVLSGTR Carbamidomethyl (C11)                                                                                             | 18.4  |
|                                                                |               |                                                                                   |       |      |       |               |                  |       | NFNVPVGGCGQTVIAEVENLNGDIDPEVHLPVYVDR Carbamidomethyl (C9)                                                     | 57.1             |      |      |    |    |    |      | NFNVPVGGCGQTVIAEVENLNGDIDPEVHLPVYVDR Carbamidomethyl (C9)                                                                       | 56.2  |
|                                                                |               |                                                                                   |       |      |       |               |                  |       | NFNVPVGGCGQTVIAEVENLNGDIDPEVHLPVYVDR Deamidated (O11)                                                         | 91.4             |      |      |    |    |    |      | LLKIAEDTVDVQK                                                                                                                   | 54.6  |
|                                                                |               |                                                                                   |       |      |       |               |                  |       | NFNVPVGGCGQTVIAEVENLNGDIDPEVHLPVYVDR Deamidated (O11)- Deamidated (N1)- Deamidated (N2)- Carbamidomethyl (C9) | 71.42            |      |      |    |    |    |      | NFNVPVGGCGQTVIAEVENLNGDIDPEVHLPVYVDR Carbamidomethyl (C9)                                                                       | 70.0  |
|                                                                |               |                                                                                   |       |      |       |               |                  |       | NFNVPVGGCGQTVIAEVENLNGDIDPEVHLPVYVDR Deamidated (O8)- Carbamidomethyl (C9)                                    | 50.3             |      |      |    |    |    |      | NFNVPVGGCGQTVIAEVENLNGDIDPEVHLPVYVDR Carbamidomethyl (C9)- Deamidated (N19)                                                     | 119.5 |
|                                                                |               |                                                                                   |       |      |       |               |                  |       | NFNVPVGGCGQTVIAEVENLNGDIDPEVHLPVYVDR Deamidated (O8)- Deamidated (N1)- Deamidated (N2)- Carbamidomethyl (C9)  | 95.8             |      |      |    |    |    |      | NFNVPVGGCGQTVIAEVENLNGDIDPEVHLPVYVDR Carbamidomethyl (C9)- Deamidated (N23)                                                     | 186.0 |
|                                                                |               |                                                                                   |       |      |       |               |                  |       | VVYPERVQLEHR                                                                                                  | 20.6             |      |      |    |    |    |      | NFNVPVGGCGQTVIAEVENLNGDIDPEVHLPVYVDR Deamidated (N3)- Carbamidomethyl (C9)                                                      | 63.5  |
|                                                                |               |                                                                                   |       |      |       |               |                  |       | VVYPERVQLEHR Deamidated (Q8)                                                                                  | 27.5             |      |      |    |    |    |      | NFNVPVGGCGQTVIAEVENLNGDIDPEVHLPVYVDR Deamidated (Q8)- Deamidated (N1)- Deamidated (N3)- Deamidated (N19)- Carbamidomethyl (C9)  | 36.4  |
|                                                                |               |                                                                                   |       |      |       |               |                  |       | YQTLIEHR                                                                                                      | 39.9             |      |      |    |    |    |      | NFNVPVGGCGQTVIAEVENLNGDIDPEVHLPVYVDR Deamidated (Q8)- Deamidated (N1)- Deamidated (N3)- Deamidated (N23)- Carbamidomethyl (C9)  | 42.2  |
|                                                                |               |                                                                                   |       |      |       |               |                  |       |                                                                                                               |                  |      |      |    |    |    |      | NFNVPVGGCGQTVIAEVENLNGDIDPEVHLPVYVDR Deamidated (Q8)- Deamidated (G11)- Deamidated (N3)- Deamidated (N23)- Carbamidomethyl (C9) | 21.3  |
|                                                                |               |                                                                                   |       |      |       |               |                  |       |                                                                                                               |                  |      |      |    |    |    |      | YQTLIEHR                                                                                                                        | 37.4  |
|                                                                |               |                                                                                   |       |      |       |               |                  |       |                                                                                                               |                  |      |      |    |    |    |      |                                                                                                                                 | 32.4  |
|                                                                |               |                                                                                   |       |      |       |               |                  |       |                                                                                                               |                  |      |      |    |    |    |      |                                                                                                                                 |       |
|                                                                |               |                                                                                   |       |      |       |               |                  |       |                                                                                                               |                  |      |      |    |    |    |      |                                                                                                                                 |       |
|                                                                |               |                                                                                   |       |      |       |               |                  |       |                                                                                                               |                  |      |      |    |    |    |      |                                                                                                                                 |       |
| 34                                                             | Tb927.11.1450 | 2-oxoglutarate dehydrogenase E1 component, putative                               | 1.00  | 813  | 75    | 23            | 21               | 30.9  | AESSEGAEWCLAEMAFGATALEGTHVR Carbamidomethyl (C11)                                                             | 5.8              | 1.00 | 1034 | 59 | 24 | 22 | 34.2 | AESSEGAEWCLAEMAFGATALEGTHVR Carbamidomethyl (C11)                                                                               | 34.7  |
|                                                                |               |                                                                                   |       |      |       |               |                  |       | FSLDCAELVWMLMGEASDLGVTSFVQGMFHR                                                                               | 61.3             |      |      |    |    |    |      | FSLDCAELVWMLMGEASDLGVTSFVQGMFHR                                                                                                 | 48.1  |
|                                                                |               |                                                                                   |       |      |       |               |                  |       | GRNLNLANVK                                                                                                    | 31.1             |      |      |    |    |    |      | GRNLNLANVK                                                                                                                      | 23.3  |
|                                                                |               |                                                                                   |       |      |       |               |                  |       | HAAYDLLETNRK                                                                                                  | 38.7             |      |      |    |    |    |      | HAAYDLLETNRK                                                                                                                    | 37.2  |
|                                                                |               |                                                                                   |       |      |       |               |                  |       | HAAYDLLETNRK Deamidated (N10)                                                                                 | 34.7             |      |      |    |    |    |      | KVLFCTGQIESVDDR Carbamidomethyl (C5)                                                                                            | 58.8  |
|                                                                |               |                                                                                   |       |      |       |               |                  |       | HLGMAGSSDFLPVYGR                                                                                              | 1.3              |      |      |    |    |    |      | KVLFCTGQIESVDDR Carbamidomethyl (C5)                                                                                            | 29.5  |
|                                                                |               |                                                                                   |       |      |       |               |                  |       | HLGMAGSSDFLPVYGR Oxidation (M4)                                                                               | 39.1             |      |      |    |    |    |      | LGDNHYLGADR                                                                                                                     | 41.9  |
|                                                                |               |                                                                                   |       |      |       |               |                  |       | KVLFCTGQIESVDDR Carbamidomethyl (C5)                                                                          | 60.4             |      |      |    |    |    |      | LREAYTAGSCEPYTK Carbamidomethyl (C11)                                                                                           | 47.6  |

Peptides

| Accession                    | Protein                                                                                                                                                                                                                                                                       | Start                                                   | End  | Modifications | Peptide | Score                                 | Accession | Protein                                                                                                      | Start                                                                                                                                                 | End                                 | Modifications | Peptide | Score |    |      |                                                                                                      |      |     |      |                                                             |      |                                                      |      |      |     |    |    |    |      |                                                                    |      |
|------------------------------|-------------------------------------------------------------------------------------------------------------------------------------------------------------------------------------------------------------------------------------------------------------------------------|---------------------------------------------------------|------|---------------|---------|---------------------------------------|-----------|--------------------------------------------------------------------------------------------------------------|-------------------------------------------------------------------------------------------------------------------------------------------------------|-------------------------------------|---------------|---------|-------|----|------|------------------------------------------------------------------------------------------------------|------|-----|------|-------------------------------------------------------------|------|------------------------------------------------------|------|------|-----|----|----|----|------|--------------------------------------------------------------------|------|
| 35                           | Tb927.10.14820 mitochondrial carrier protein, putative, ADP/ATP translocase 1, putative<br>Tb927.10.14830 mitochondrial carrier protein, putative, ADP/ATP translocase 1, putative<br>Tb927.10.14840 mitochondrial carrier protein, putative, ADP/ATP translocase 1, putative | 1.00                                                    | 990  | 216           | 21      | 15                                    | 45.6      | LAGEDVERSTFTGR                                                                                               | 35.3                                                                                                                                                  | 0.99                                | 737           | 148     | 13    | 9  | 38.2 | NGKVINFDLLCNPSHLEAMNPLVLGK Deamidated (N1); Carbamidomethyl (C11)                                    | 50.8 |     |      |                                                             |      |                                                      |      |      |     |    |    |    |      |                                                                    |      |
|                              |                                                                                                                                                                                                                                                                               |                                                         |      |               |         |                                       |           | LDGNYHGLADR                                                                                                  | 32.6                                                                                                                                                  |                                     |               |         |       |    |      | NGKVINFDLLCNPSHLEAMNPLVLGK Deamidated (N1); Deamidated (N6); Deamidated (N12); Carbamidomethyl (C11) | 31.5 |     |      |                                                             |      |                                                      |      |      |     |    |    |    |      |                                                                    |      |
|                              |                                                                                                                                                                                                                                                                               |                                                         |      |               |         |                                       |           | LRGAEVTDQSPKTYK Carbamidomethyl (C11)                                                                        | 54.0                                                                                                                                                  |                                     |               |         |       |    |      | RGDPKPLVFFSK                                                                                         | 29.8 |     |      |                                                             |      |                                                      |      |      |     |    |    |    |      |                                                                    |      |
|                              |                                                                                                                                                                                                                                                                               |                                                         |      |               |         |                                       |           | RGDPKPLVFFSK                                                                                                 | 25.1                                                                                                                                                  |                                     |               |         |       |    |      | SGSPDAPLVQDFTRPK                                                                                     | 34.8 |     |      |                                                             |      |                                                      |      |      |     |    |    |    |      |                                                                    |      |
|                              |                                                                                                                                                                                                                                                                               |                                                         |      |               |         |                                       |           | RVGLHVTTPSEVK                                                                                                | 32.8                                                                                                                                                  |                                     |               |         |       |    |      | SLRRLVDVYSLVEEGVLTKEVDK                                                                              | 42.8 |     |      |                                                             |      |                                                      |      |      |     |    |    |    |      |                                                                    |      |
|                              |                                                                                                                                                                                                                                                                               |                                                         |      |               |         |                                       |           | SLRRLVDVYSLVEEGVLTKEVDK                                                                                      | 21.0                                                                                                                                                  |                                     |               |         |       |    |      | SLRRLVDVYSLVEEGVLTKEVDKAK                                                                            | 33.3 |     |      |                                                             |      |                                                      |      |      |     |    |    |    |      |                                                                    |      |
|                              |                                                                                                                                                                                                                                                                               |                                                         |      |               |         |                                       |           | SLRFLVDVYSLVEEGVLTKEVDKAK                                                                                    | 26.3                                                                                                                                                  |                                     |               |         |       |    |      | TLPIAHGDAAASGLMGCHETMGLVLDNVR                                                                        | 14.4 |     |      |                                                             |      |                                                      |      |      |     |    |    |    |      |                                                                    |      |
|                              |                                                                                                                                                                                                                                                                               |                                                         |      |               |         |                                       |           | VGLHVTTPSEVK                                                                                                 | 31.3                                                                                                                                                  |                                     |               |         |       |    |      | TVRQPHRYDAITAENEVYIEQLK                                                                              | 31.6 |     |      |                                                             |      |                                                      |      |      |     |    |    |    |      |                                                                    |      |
|                              |                                                                                                                                                                                                                                                                               |                                                         |      |               |         |                                       |           | VGLHVTTPSEVK                                                                                                 | 34.4                                                                                                                                                  |                                     |               |         |       |    |      | TVRQPHRYDAITAENEVYIEQLK Deamidated (Q22)                                                             | 31.1 |     |      |                                                             |      |                                                      |      |      |     |    |    |    |      |                                                                    |      |
|                              |                                                                                                                                                                                                                                                                               |                                                         |      |               |         |                                       |           | VGLHVTTPSEVKWHPVIER                                                                                          | 32.5                                                                                                                                                  |                                     |               |         |       |    |      | VGLHVTTPSEVK                                                                                         | 49.6 |     |      |                                                             |      |                                                      |      |      |     |    |    |    |      |                                                                    |      |
|                              |                                                                                                                                                                                                                                                                               |                                                         |      |               |         |                                       |           | VIPNLREDAGNASEGYDLAEKEANLPK                                                                                  | 26.4                                                                                                                                                  |                                     |               |         |       |    |      | VGLHVTTPSEVK                                                                                         | 24.2 |     |      |                                                             |      |                                                      |      |      |     |    |    |    |      |                                                                    |      |
|                              |                                                                                                                                                                                                                                                                               |                                                         |      |               |         |                                       |           | VKPLTDLAEFEQK                                                                                                | 21.5                                                                                                                                                  |                                     |               |         |       |    |      | VIPNLREDAGNASEGYDLAEKEANLPK Carbamidomethyl (C8)                                                     | 25.1 |     |      |                                                             |      |                                                      |      |      |     |    |    |    |      |                                                                    |      |
|                              |                                                                                                                                                                                                                                                                               |                                                         |      |               |         |                                       |           | VKPLTDLAEFEQKTHR                                                                                             | 30.6                                                                                                                                                  |                                     |               |         |       |    |      | VIPNLREDAGNASEGYDLAEKEANLPK                                                                          | 43.4 |     |      |                                                             |      |                                                      |      |      |     |    |    |    |      |                                                                    |      |
|                              |                                                                                                                                                                                                                                                                               |                                                         |      |               |         |                                       |           | VTAASPTGVATVHAEEAEIRQALA                                                                                     | 11.7                                                                                                                                                  |                                     |               |         |       |    |      | VKPLTDLAEFEQK                                                                                        | 38.6 |     |      |                                                             |      |                                                      |      |      |     |    |    |    |      |                                                                    |      |
|                              |                                                                                                                                                                                                                                                                               |                                                         |      |               |         |                                       |           | YLGQCSDTDVVPHNFR Carbamidomethyl (C5)                                                                        | 28.2                                                                                                                                                  |                                     |               |         |       |    |      | VKPLTDLAEFEQKTHR                                                                                     | 15.9 |     |      |                                                             |      |                                                      |      |      |     |    |    |    |      |                                                                    |      |
|                              |                                                                                                                                                                                                                                                                               |                                                         |      |               |         | YLGQCSDTDVVPHNFR Carbamidomethyl (C5) | 46.1      |                                                                                                              |                                                                                                                                                       |                                     |               |         |       |    |      |                                                                                                      |      |     |      |                                                             |      |                                                      |      |      |     |    |    |    |      |                                                                    |      |
| 36                           | Tb927.10.14550 ATP-dependent DEAD/H RNA helicase, putative                                                                                                                                                                                                                    | 1.00                                                    | 836  | 50            | 16      | 10                                    | 19.6      | GAGANILRGIAGAGVLSGDVDAKPIYVEWR                                                                               | 44.8                                                                                                                                                  | 1.00                                | 687           | 52      | 13    | 10 | 23.8 | GLDIPNVGVVQYDMPNDDVYHR                                                                               | 27.6 |     |      |                                                             |      |                                                      |      |      |     |    |    |    |      |                                                                    |      |
|                              |                                                                                                                                                                                                                                                                               |                                                         |      |               |         |                                       |           | GIAGAGVLSGDVDAKPIYVEWR                                                                                       | 65.4                                                                                                                                                  |                                     |               |         |       |    |      | HSLFQVGR                                                                                             | 30.5 |     |      |                                                             |      |                                                      |      |      |     |    |    |    |      |                                                                    |      |
|                              |                                                                                                                                                                                                                                                                               |                                                         |      |               |         |                                       |           | GIAGAGVLSGDVDAKPIYVEWR                                                                                       | 35.5                                                                                                                                                  |                                     |               |         |       |    |      | KFTYVTVR                                                                                             | 33.9 |     |      |                                                             |      |                                                      |      |      |     |    |    |    |      |                                                                    |      |
|                              |                                                                                                                                                                                                                                                                               |                                                         |      |               |         |                                       |           | LDKPYNGVDFCFRR Carbamidomethyl (C11)                                                                         | 20.8                                                                                                                                                  |                                     |               |         |       |    |      | NIVDOLPLLNQVSPVPR                                                                                    | 52.3 |     |      |                                                             |      |                                                      |      |      |     |    |    |    |      |                                                                    |      |
|                              |                                                                                                                                                                                                                                                                               |                                                         |      |               |         |                                       |           | LDKPYNGVDFCFRR Deamidated (N6); Carbamidomethyl (C11)                                                        | 23.7                                                                                                                                                  |                                     |               |         |       |    |      | NIVDOLPLLNQVSPVPR Deamidated (Q15)                                                                   | 19.2 |     |      |                                                             |      |                                                      |      |      |     |    |    |    |      |                                                                    |      |
|                              |                                                                                                                                                                                                                                                                               |                                                         |      |               |         |                                       |           | LGFLPEEMIGVAAAGLSK                                                                                           | 30.6                                                                                                                                                  |                                     |               |         |       |    |      | QALLTLLENQK                                                                                          | 29.1 |     |      |                                                             |      |                                                      |      |      |     |    |    |    |      |                                                                    |      |
|                              |                                                                                                                                                                                                                                                                               |                                                         |      |               |         |                                       |           | LGFLPEEMIGVAAAGLSK Oxidation (M8)                                                                            | 26.4                                                                                                                                                  |                                     |               |         |       |    |      | SGAGQVATDVAWR Carbamidomethyl (C4)                                                                   | 55.4 |     |      |                                                             |      |                                                      |      |      |     |    |    |    |      |                                                                    |      |
|                              |                                                                                                                                                                                                                                                                               |                                                         |      |               |         |                                       |           | LLVQNGEMMK Oxidation (M10)                                                                                   | 12.1                                                                                                                                                  |                                     |               |         |       |    |      | TASYLIPANELLNENRPPYSPGSHSPQALLAPTR                                                                   | 50.4 |     |      |                                                             |      |                                                      |      |      |     |    |    |    |      |                                                                    |      |
|                              |                                                                                                                                                                                                                                                                               |                                                         |      |               |         |                                       |           | LLVQNGEMMK Oxidation (M9); Oxidation (M10)                                                                   | 45.5                                                                                                                                                  |                                     |               |         |       |    |      | TASYLIPANELLNENRPPYSPGSHSPQALLAPTR Deamidated (N10)                                                  | 59.5 |     |      |                                                             |      |                                                      |      |      |     |    |    |    |      |                                                                    |      |
|                              |                                                                                                                                                                                                                                                                               |                                                         |      |               |         |                                       |           | RTISTEGVPLWR                                                                                                 | 23.8                                                                                                                                                  |                                     |               |         |       |    |      | TASYLIPANELLNENRPPYSPGSHSPQALLAPTR Deamidated (Q31)                                                  | 42.8 |     |      |                                                             |      |                                                      |      |      |     |    |    |    |      |                                                                    |      |
|                              |                                                                                                                                                                                                                                                                               |                                                         |      |               |         |                                       |           | TAAPIER                                                                                                      | 22.3                                                                                                                                                  |                                     |               |         |       |    |      | VGISTENTQDVR                                                                                         | 55.0 |     |      |                                                             |      |                                                      |      |      |     |    |    |    |      |                                                                    |      |
|                              |                                                                                                                                                                                                                                                                               |                                                         |      |               |         |                                       |           | TAAPIERVK                                                                                                    | 27.0                                                                                                                                                  |                                     |               |         |       |    |      | VGVASFFNEK                                                                                           | 54.1 |     |      |                                                             |      |                                                      |      |      |     |    |    |    |      |                                                                    |      |
|                              |                                                                                                                                                                                                                                                                               |                                                         |      |               |         |                                       |           | TISTEGVPLWR                                                                                                  | 53.7                                                                                                                                                  |                                     |               |         |       |    |      | VGVASFFNEK Deamidated (N9)                                                                           | 46.4 |     |      |                                                             |      |                                                      |      |      |     |    |    |    |      |                                                                    |      |
|                              |                                                                                                                                                                                                                                                                               |                                                         |      |               |         |                                       |           | TISTEGVPLWRHLSVLR                                                                                            | 15.8                                                                                                                                                  |                                     |               |         |       |    |      |                                                                                                      |      |     |      |                                                             |      |                                                      |      |      |     |    |    |    |      |                                                                    |      |
|                              |                                                                                                                                                                                                                                                                               |                                                         |      |               |         |                                       |           | VKLLVQNGEMMK Oxidation (M11); Oxidation (M12)                                                                | 31.8                                                                                                                                                  |                                     |               |         |       |    |      |                                                                                                      |      |     |      |                                                             |      |                                                      |      |      |     |    |    |    |      |                                                                    |      |
|                              |                                                                                                                                                                                                                                                                               |                                                         |      |               |         |                                       |           | VKLLVQNGEMMK Oxidation (M12)                                                                                 | 13.6                                                                                                                                                  |                                     |               |         |       |    |      |                                                                                                      |      |     |      |                                                             |      |                                                      |      |      |     |    |    |    |      |                                                                    |      |
|                              |                                                                                                                                                                                                                                                                               |                                                         |      |               |         |                                       |           | YFPTQALNFAFK                                                                                                 | 47.3                                                                                                                                                  |                                     |               |         |       |    |      |                                                                                                      |      |     |      |                                                             |      |                                                      |      |      |     |    |    |    |      |                                                                    |      |
|                              |                                                                                                                                                                                                                                                                               |                                                         |      |               |         |                                       |           | YFPTQALNFAFK Deamidated (Q5)                                                                                 | 25.7                                                                                                                                                  |                                     |               |         |       |    |      |                                                                                                      |      |     |      |                                                             |      |                                                      |      |      |     |    |    |    |      |                                                                    |      |
|                              |                                                                                                                                                                                                                                                                               |                                                         |      |               |         |                                       |           | YFPTQALNFAFKK                                                                                                | 59.9                                                                                                                                                  |                                     |               |         |       |    |      |                                                                                                      |      |     |      |                                                             |      |                                                      |      |      |     |    |    |    |      |                                                                    |      |
|                              |                                                                                                                                                                                                                                                                               |                                                         |      |               |         |                                       |           | YKNSMDCMLQVKGGAASLMR Oxidation (M5); Oxidation (M8); Oxidation (M21); Carbamidomethyl (C7)                   | 26.6                                                                                                                                                  |                                     |               |         |       |    |      |                                                                                                      |      |     |      |                                                             |      |                                                      |      |      |     |    |    |    |      |                                                                    |      |
|                              |                                                                                                                                                                                                                                                                               |                                                         |      |               |         |                                       |           | YKNSMDCMLQVKGGAASLMR Oxidation (M5); Oxidation (M8); Oxidation (M21); Carbamidomethyl (C7); Deamidated (Q10) | 22.3                                                                                                                                                  |                                     |               |         |       |    |      |                                                                                                      |      |     |      |                                                             |      |                                                      |      |      |     |    |    |    |      |                                                                    |      |
|                              |                                                                                                                                                                                                                                                                               |                                                         |      |               |         |                                       |           | 37                                                                                                           | Tb927.10.2090 elongation factor 1-alpha, EF-1-alpha<br>Tb927.10.2100 elongation factor 1-alpha, EF-1-alpha<br>Tb927.10.2110 elongation factor 1-alpha |                                     |               |         |       |    |      | 1.00                                                                                                 | 1018 | 179 | 22   | 12                                                          | 43.4 | APAFGEAGHQVGNVYGGYQQRPR                              | 51.5 | 0.97 | 591 | 54 | 15 | 10 | 42.5 | GPTLEALDMLPEPPRSDKPLRLPLQDVYK                                      | 25.9 |
|                              |                                                                                                                                                                                                                                                                               |                                                         |      |               |         |                                       |           |                                                                                                              |                                                                                                                                                       |                                     |               |         |       |    |      |                                                                                                      |      |     |      |                                                             |      | APAFGEAGHQVGNVYGGYQQRPR Deamidated (N14)             | 62.4 |      |     |    |    |    |      | IGSGIVPVGR                                                         | 57.5 |
|                              |                                                                                                                                                                                                                                                                               |                                                         |      |               |         |                                       |           |                                                                                                              |                                                                                                                                                       |                                     |               |         |       |    |      |                                                                                                      |      |     |      |                                                             |      | APAFGEAGHQVGNVYGGYQQRPR Deamidated (Q10)             | 65.8 |      |     |    |    |    |      | IGSGIVPVGR                                                         | 34.9 |
|                              |                                                                                                                                                                                                                                                                               |                                                         |      |               |         |                                       |           |                                                                                                              |                                                                                                                                                       |                                     |               |         |       |    |      |                                                                                                      |      |     |      |                                                             |      | APAFGEAGHQVGNVYGGYQQRPR Deamidated (Q20)             | 31.0 |      |     |    |    |    |      | IGSGIVPVGRVETGVMPKGDVTFAPANVTEVK Deamidated (N29)                  | 37.6 |
|                              |                                                                                                                                                                                                                                                                               |                                                         |      |               |         |                                       |           |                                                                                                              |                                                                                                                                                       |                                     |               |         |       |    |      |                                                                                                      |      |     |      |                                                             |      | FLLDDEADRLDMGFEPQIR Oxidation (M10); Oxidation (M13) | 23.5 |      |     |    |    |    |      | IGSGIVPVGRVETGVMPKGDVTFAPANVTEVK Oxidation (M17)                   | 18.6 |
|                              |                                                                                                                                                                                                                                                                               |                                                         |      |               |         |                                       |           |                                                                                                              |                                                                                                                                                       |                                     |               |         |       |    |      |                                                                                                      |      |     |      |                                                             |      | HRLQLVGR                                             | 38.3 |      |     |    |    |    |      | IGSGIVPVGRVETGVMPKGDVTFAPANVTEVK Oxidation (M17); Deamidated (N29) | 17.0 |
|                              |                                                                                                                                                                                                                                                                               |                                                         |      |               |         |                                       |           |                                                                                                              |                                                                                                                                                       |                                     |               |         |       |    |      |                                                                                                      |      |     |      |                                                             |      | MIVQGPSDMR Oxidation (M10); Oxidation (M10)          | 39.8 |      |     |    |    |    |      | MVPQKMCVEFVNDVAPLGR Carbamidomethyl (C8)                           | 12.2 |
|                              |                                                                                                                                                                                                                                                                               |                                                         |      |               |         |                                       |           |                                                                                                              |                                                                                                                                                       |                                     |               |         |       |    |      |                                                                                                      |      |     |      |                                                             |      | MIVQGPSDMR Oxidation (M10)                           | 6.0  |      |     |    |    |    |      | MVPQKMCVEFVNDVAPLGR Oxidation (M1); Carbamidomethyl (C8)           | 35.8 |
|                              |                                                                                                                                                                                                                                                                               |                                                         |      |               |         |                                       |           |                                                                                                              |                                                                                                                                                       |                                     |               |         |       |    |      |                                                                                                      |      |     |      |                                                             |      | NIVDOLPLLNQVSPVPR                                    | 37.8 |      |     |    |    |    |      | MVPQKMCVEFVNDVAPLGR Oxidation (M7); Carbamidomethyl (C8)           | 40.0 |
|                              |                                                                                                                                                                                                                                                                               |                                                         |      |               |         |                                       |           |                                                                                                              |                                                                                                                                                       |                                     |               |         |       |    |      |                                                                                                      |      |     |      |                                                             |      | NIVDOLPLLNQVSPVPR Deamidated (Q15)                   | 26.2 |      |     |    |    |    |      | MVPQKMCVEFVNDVAPLGR Oxidation (M7); Carbamidomethyl (C8)           | 40.4 |
|                              |                                                                                                                                                                                                                                                                               |                                                         |      |               |         |                                       |           |                                                                                                              |                                                                                                                                                       |                                     |               |         |       |    |      |                                                                                                      |      |     |      |                                                             |      | NRNVDLPLLNQVSPVPR Deamidated (N13)                   | 31.2 |      |     |    |    |    |      | OTVAVGIK                                                           | 43.5 |
|                              |                                                                                                                                                                                                                                                                               |                                                         |      |               |         |                                       |           |                                                                                                              |                                                                                                                                                       |                                     |               |         |       |    |      |                                                                                                      |      |     |      |                                                             |      | QTLYSATPVEIGR                                        | 56.5 |      |     |    |    |    |      | SGDAAVR                                                            | 33.8 |
|                              |                                                                                                                                                                                                                                                                               |                                                         |      |               |         |                                       |           |                                                                                                              |                                                                                                                                                       |                                     |               |         |       |    |      |                                                                                                      |      |     |      |                                                             |      | SGAGQVATDVAWR Carbamidomethyl (C4)                   | 63.0 |      |     |    |    |    |      | SGKELEKAPK                                                         | 40.4 |
|                              |                                                                                                                                                                                                                                                                               |                                                         |      |               |         |                                       |           |                                                                                                              |                                                                                                                                                       |                                     |               |         |       |    |      |                                                                                                      |      |     |      |                                                             |      | VGVASFFNEK                                           | 48.7 |      |     |    |    |    |      | SIEMHHEQLAEATPGDVGFNWK                                             | 40.4 |
| VGVASFFNEK Deamidated (N9)   | 43.4                                                                                                                                                                                                                                                                          | SIEMHHEQLAEATPGDVGFNWK Oxidation (M4)                   | 47.7 |               |         |                                       |           |                                                                                                              |                                                                                                                                                       |                                     |               |         |       |    |      |                                                                                                      |      |     |      |                                                             |      |                                                      |      |      |     |    |    |    |      |                                                                    |      |
| VGVASFFNEKRNIVDOLPLLNQVSPVPR | 25.0                                                                                                                                                                                                                                                                          | SIEMHHEQLAEATPGDVGFNWK Oxidation (M4); Deamidated (N17) | 34.0 |               |         |                                       |           |                                                                                                              |                                                                                                                                                       |                                     |               |         |       |    |      |                                                                                                      |      |     |      |                                                             |      |                                                      |      |      |     |    |    |    |      |                                                                    |      |
|                              |                                                                                                                                                                                                                                                                               | SIEMHHEQLAEATPGDVGFNWK Oxidation (M4); Deamidated (N21) | 29.1 |               |         |                                       |           |                                                                                                              |                                                                                                                                                       |                                     |               |         |       |    |      |                                                                                                      |      |     |      |                                                             |      |                                                      |      |      |     |    |    |    |      |                                                                    |      |
|                              |                                                                                                                                                                                                                                                                               | SIKSDAVIR                                               | 44.1 |               |         |                                       |           |                                                                                                              |                                                                                                                                                       |                                     |               |         |       |    |      |                                                                                                      |      |     |      |                                                             |      |                                                      |      |      |     |    |    |    |      |                                                                    |      |
|                              |                                                                                                                                                                                                                                                                               | VETGMKPGDVTTFAPANVTEVK                                  | 26.9 |               |         |                                       |           |                                                                                                              |                                                                                                                                                       |                                     |               |         |       |    |      |                                                                                                      |      |     |      |                                                             |      |                                                      |      |      |     |    |    |    |      |                                                                    |      |
|                              |                                                                                                                                                                                                                                                                               | VETGMKPGDVTTFAPANVTEVK Oxidation (M6)                   | 41.6 |               |         |                                       |           |                                                                                                              |                                                                                                                                                       |                                     |               |         |       |    |      |                                                                                                      |      |     |      |                                                             |      |                                                      |      |      |     |    |    |    |      |                                                                    |      |
|                              |                                                                                                                                                                                                                                                                               | VETGMKPGDVTTFAPANVTEVK Oxidation (M6); Deamidated (N18) | 30.1 |               |         |                                       |           |                                                                                                              |                                                                                                                                                       |                                     |               |         |       |    |      |                                                                                                      |      |     |      |                                                             |      |                                                      |      |      |     |    |    |    |      |                                                                    |      |
|                              |                                                                                                                                                                                                                                                                               | VGVNEKVR                                                | 46.0 |               |         |                                       |           |                                                                                                              |                                                                                                                                                       |                                     |               |         |       |    |      |                                                                                                      |      |     |      |                                                             |      |                                                      |      |      |     |    |    |    |      |                                                                    |      |
| 38                           | Tb927.7.7420 ATP synthase alpha chain, mitochondrial precursor, ATP synthase F1, alpha subunit<br>Tb927.7.7430 ATP synthase alpha chain, mitochondrial precursor, ATP synthase F1, alpha subunit                                                                              | 1.00                                                    | 1032 | 79            | 25      | 16                                    | 23.5      |                                                                                                              |                                                                                                                                                       | ALKNLLYSCK Carbamidomethyl (C9)     | 47.6          | 0.84    | 247   | 24 | 10   |                                                                                                      |      |     |      |                                                             |      | 8                                                    | 16.1 |      |     |    |    |    |      | ALKNLLYSCKR Carbamidomethyl (C9)                                   | 25.9 |
|                              |                                                                                                                                                                                                                                                                               |                                                         |      |               |         |                                       |           |                                                                                                              |                                                                                                                                                       | ALKNLLYSCKR Carbamidomethyl (C9)    | 15.5          |         |       |    |      |                                                                                                      |      |     |      |                                                             |      |                                                      |      |      |     |    |    |    |      | AQDTMIPGR                                                          | 19.1 |
|                              |                                                                                                                                                                                                                                                                               |                                                         |      |               |         |                                       |           |                                                                                                              |                                                                                                                                                       | AVDTMIPGR Oxidation (M5)            | 53.0          |         |       |    |      |                                                                                                      |      |     |      |                                                             |      |                                                      |      |      |     |    |    |    |      | EAYPGDFVYLSR                                                       | 14.7 |
|                              |                                                                                                                                                                                                                                                                               |                                                         |      |               |         |                                       |           |                                                                                                              |                                                                                                                                                       | EAYPGDFVYLSR                        | 24.9          |         |       |    |      |                                                                                                      |      |     |      |                                                             |      |                                                      |      |      |     |    |    |    |      | LAADSVGGQVQVTPIMR                                                  | 11.2 |
|                              |                                                                                                                                                                                                                                                                               |                                                         |      |               |         |                                       |           |                                                                                                              |                                                                                                                                                       | ELIVGDRGQTK                         | 26.3          |         |       |    |      |                                                                                                      |      |     |      |                                                             |      |                                                      |      |      |     |    |    |    |      | LAADSVGGQVQVTPIMR Oxidation (M16)                                  | 8.9  |
|                              |                                                                                                                                                                                                                                                                               |                                                         |      |               |         |                                       |           |                                                                                                              |                                                                                                                                                       | GLAEYK                              | 36.0          |         |       |    |      |                                                                                                      |      |     |      |                                                             |      |                                                      |      |      |     |    |    |    |      | LAADSVGGQVQVTPIMRGR Oxidation (M16)                                | 1.8  |
|                              |                                                                                                                                                                                                                                                                               |                                                         |      |               |         |                                       |           |                                                                                                              |                                                                                                                                                       | LAADSVGGQVQVTPIMR                   | 17.7          |         |       |    |      |                                                                                                      |      |     |      |                                                             |      |                                                      |      |      |     |    |    |    |      | LAADSVGGQVQVTPIMRGR Oxidation (M17)                                | 52.1 |
|                              |                                                                                                                                                                                                                                                                               |                                                         |      |               |         |                                       |           |                                                                                                              |                                                                                                                                                       | LAADSVGGQVQVTPIMR Oxidation (M16)   | 41.6          |         |       |    |      |                                                                                                      |      |     |      |                                                             |      |                                                      |      |      |     |    |    |    |      | SPVNYLLTGFK Deamidated (N6)                                        | 19.2 |
|                              |                                                                                                                                                                                                                                                                               |                                                         |      |               |         |                                       |           |                                                                                                              |                                                                                                                                                       | LAADSVGGQVQVTPIMRGR Oxidation (M16) | 26.9          |         |       |    |      |                                                                                                      |      |     |      |                                                             |      |                                                      |      |      |     |    |    |    |      | VDTGAPNISR                                                         | 50.0 |
|                              |                                                                                                                                                                                                                                                                               |                                                         |      |               |         |                                       |           |                                                                                                              |                                                                                                                                                       | LKGLAEYK                            | 29.5          |         |       |    |      |                                                                                                      |      |     |      |                                                             |      |                                                      |      |      |     |    |    |    |      | VSSAQAAMKGVAGK                                                     | 13.6 |
|                              |                                                                                                                                                                                                                                                                               |                                                         |      |               |         |                                       |           |                                                                                                              |                                                                                                                                                       | SPVNYLLTGFK                         | 51.1          |         |       |    |      |                                                                                                      |      |     |      |                                                             |      |                                                      |      |      |     |    |    |    |      |                                                                    |      |
|                              |                                                                                                                                                                                                                                                                               |                                                         |      |               |         |                                       |           |                                                                                                              |                                                                                                                                                       | SPVNYLLTGFK Deamidated (N4)         | 22.2          |         |       |    |      |                                                                                                      |      |     |      |                                                             |      |                                                      |      |      |     |    |    |    |      |                                                                    |      |
|                              |                                                                                                                                                                                                                                                                               |                                                         |      |               |         |                                       |           |                                                                                                              |                                                                                                                                                       | SPVNYLLTGFKVDTMIPGR                 | 41.6          |         |       |    |      |                                                                                                      |      |     |      |                                                             |      |                                                      |      |      |     |    |    |    |      |                                                                    |      |
|                              |                                                                                                                                                                                                                                                                               |                                                         |      |               |         |                                       |           | SPVNYLLTGFKVDTMIPGR Deamidated (N4); Deamidated (N6)                                                         | 25.3                                                                                                                                                  |                                     |               |         |       |    |      |                                                                                                      |      |     |      |                                                             |      |                                                      |      |      |     |    |    |    |      |                                                                    |      |
|                              |                                                                                                                                                                                                                                                                               |                                                         |      |               |         |                                       |           | SPVNYLLTGFKVDTMIPGR Deamidated (N4); Oxidation (M17)                                                         | 33.6                                                                                                                                                  |                                     |               |         |       |    |      |                                                                                                      |      |     |      |                                                             |      |                                                      |      |      |     |    |    |    |      |                                                                    |      |
|                              |                                                                                                                                                                                                                                                                               |                                                         |      |               |         |                                       |           | SPVNYLLTGFKVDTMIPGR Deamidated (N6); Oxidation (M17)                                                         | 25.1                                                                                                                                                  |                                     |               |         |       |    |      |                                                                                                      |      |     |      |                                                             |      |                                                      |      |      |     |    |    |    |      |                                                                    |      |
|                              |                                                                                                                                                                                                                                                                               |                                                         |      |               |         |                                       |           | SPVNYLLTGFKVDTMIPGR Oxidation (M17)                                                                          | 45.8                                                                                                                                                  |                                     |               |         |       |    |      |                                                                                                      |      |     |      |                                                             |      |                                                      |      |      |     |    |    |    |      |                                                                    |      |
|                              |                                                                                                                                                                                                                                                                               |                                                         |      |               |         |                                       |           | SPVNYLLTGFKVDTMIPGRGR                                                                                        | 44.9                                                                                                                                                  |                                     |               |         |       |    |      |                                                                                                      |      |     |      |                                                             |      |                                                      |      |      |     |    |    |    |      |                                                                    |      |
|                              |                                                                                                                                                                                                                                                                               |                                                         |      |               |         |                                       |           | SPVNYLLTGFKVDTMIPGRGR Deamidated (Q24); Deamidated (N6)                                                      | 35.4                                                                                                                                                  |                                     |               |         |       |    |      |                                                                                                      |      |     |      |                                                             |      |                                                      |      |      |     |    |    |    |      |                                                                    |      |
|                              |                                                                                                                                                                                                                                                                               |                                                         |      |               |         |                                       |           | SPVNYLLTGFKVDTMIPGRGR Oxidation (M17)                                                                        | 44.7                                                                                                                                                  |                                     |               |         |       |    |      |                                                                                                      |      |     |      |                                                             |      |                                                      |      |      |     |    |    |    |      |                                                                    |      |
|                              |                                                                                                                                                                                                                                                                               |                                                         |      |               |         |                                       |           | VDTGAPNISR                                                                                                   | 38.3                                                                                                                                                  |                                     |               |         |       |    |      |                                                                                                      |      |     |      |                                                             |      |                                                      |      |      |     |    |    |    |      |                                                                    |      |
|                              |                                                                                                                                                                                                                                                                               |                                                         |      |               |         |                                       |           | VSSAQAAMKGVAGK Oxidation (M10)                                                                               | 24.2                                                                                                                                                  |                                     |               |         |       |    |      |                                                                                                      |      |     |      |                                                             |      |                                                      |      |      |     |    |    |    |      |                                                                    |      |
|                              |                                                                                                                                                                                                                                                                               |                                                         |      |               |         |                                       |           | VSSAQAAMKGVAGLK Oxidation (M10)                                                                              | 43.0                                                                                                                                                  |                                     |               |         |       |    |      |                                                                                                      |      |     |      |                                                             |      |                                                      |      |      |     |    |    |    |      |                                                                    |      |
|                              |                                                                                                                                                                                                                                                                               |                                                         |      |               |         |                                       |           | VMATGQLLHPVAVKDLK                                                                                            | 23.7                                                                                                                                                  |                                     |               |         |       |    |      |                                                                                                      |      |     |      |                                                             |      |                                                      |      |      |     |    |    |    |      |                                                                    |      |
|                              |                                                                                                                                                                                                                                                                               |                                                         |      |               |         |                                       |           | VMATGQLLHPVAVKDLK Oxidation (M2)                                                                             | 43.0                                                                                                                                                  |                                     |               |         |       |    |      |                                                                                                      |      |     |      |                                                             |      |                                                      |      |      |     |    |    |    |      |                                                                    |      |
|                              |                                                                                                                                                                                                                                                                               |                                                         |      |               |         |                                       |           | 39                                                                                                           | Tb927.10.2020 hexokinase                                                                                                                              | 1.00                                | 534           |         |       |    |      | 27                                                                                                   | 12   | 11  | 34.8 | AAQLSAGFCCAPLVK Carbamidomethyl (C9); Carbamidomethyl (C10) | 58.3 |                                                      |      | 1.00 | 618 | 38 | 15 | 13 | 42.3 | ATIADSVFEKIPFRR                                                    | 4.2  |
|                              |                                                                                                                                                                                                                                                                               |                                                         |      |               |         |                                       |           |                                                                                                              |                                                                                                                                                       |                                     |               |         |       |    |      |                                                                                                      |      |     |      | FAGMISADRMPLQDFTR Oxidation (M4); Oxidation (M10)           | 21.9 |                                                      |      |      |     |    |    |    |      | ATIADSVFEKIPFRR                                                    | 37.1 |
|                              |                                                                                                                                                                                                                                                                               |                                                         |      |               |         |                                       |           |                                                                                                              |                                                                                                                                                       |                                     |               |         |       |    |      |                                                                                                      |      |     |      | FVLPFTKFDLDDASLNKGGQALEK Deamidated (Q21)                   | 37.9 |                                                      |      |      |     |    |    |    |      | FVLPFTKFDLDDASLNKGGQALEK                                           | 68.8 |
|                              |                                                                                                                                                                                                                                                                               |                                                         |      |               |         |                                       |           |                                                                                                              |                                                                                                                                                       |                                     |               |         |       |    |      |                                                                                                      |      |     |      | FVLPFTKFDLDDASLNKGGQALEK Deamidated (Q22)                   | 53.5 |                                                      |      |      |     |    |    |    |      | GSALTPIHMEISGNFDSKVR Deamidated (N13)                              | 2.2  |
|                              |                                                                                                                                                                                                                                                                               |                                                         |      |               |         |                                       |           |                                                                                                              |                                                                                                                                                       |                                     |               |         |       |    |      |                                                                                                      |      |     |      | GSALTPIHMEISGNFDSKVR Oxidation (M9)                         | 47.2 |                                                      |      |      |     |    |    |    |      | GIMTYLVMREGLGR                                                     | 39.9 |
|                              |                                                                                                                                                                                                                                                                               |                                                         |      |               |         |                                       |           |                                                                                                              |                                                                                                                                                       |                                     |               |         |       |    |      |                                                                                                      |      |     |      | IRRDVCR Carbamidomethyl (C6)                                | 20.2 |                                                      |      |      |     |    |    |    |      | RLNLEHISQGNQDQVTR                                                  | 29.3 |
|                              |                                                                                                                                                                                                                                                                               |                                                         |      |               |         |                                       |           |                                                                                                              |                                                                                                                                                       |                                     |               |         |       |    |      |                                                                                                      |      |     |      | RLNLEHISQGNQDQVTR                                           | 20.4 |                                                      |      |      |     |    |    |    |      | TVRLDFVFFPEQTK                                                     | 34.2 |
|                              |                                                                                                                                                                                                                                                                               |                                                         |      |               |         |                                       |           |                                                                                                              |                                                                                                                                                       |                                     |               |         |       |    |      |                                                                                                      |      |     |      | RIVHLSINCLPAALQALGNR Carbamidomethyl (C11)                  | 55.2 |                                                      |      |      |     |    |    |    |      | WCKEGAVVDSSTAFKIPK Carbamidomethyl (C3)                            | 25.3 |
|                              |                                                                                                                                                                                                                                                                               |                                                         |      |               |         |                                       |           |                                                                                                              |                                                                                                                                                       |                                     |               |         |       |    |      |                                                                                                      |      |     |      | RIVHLSINCLPAALQALGNR Carbamidomethyl (C10)                  | 29.2 |                                                      |      |      |     |    |    |    |      | VGVVDVQSDLR Carbamidomethyl (C2); Deamidated (Q7)                  | 13.2 |
|                              |                                                                                                                                                                                                                                                                               |                                                         |      |               |         |                                       |           |                                                                                                              |                                                                                                                                                       |                                     |               |         |       |    |      |                                                                                                      |      |     |      | VLDQNNRILGPECDVR Carbamidomethyl (C14)                      | 25.5 |                                                      |      |      |     |    |    |    |      | VHLLSINCLPAALQALGNR Carbamidomethyl (C10)                          | 65.3 |
| YALEGNATLDFDIASVVK           | 72.7                                                                                                                                                                                                                                                                          |                                                         |      |               |         |                                       |           |                                                                                                              |                                                                                                                                                       |                                     |               |         |       |    |      |                                                                                                      |      |     |      |                                                             |      |                                                      |      |      |     |    |    |    |      |                                                                    |      |

Peptides

| Index | Accession                    | Protein Name                                                                                                                     | Score | Length | Start | End | Modifications | Peptide Sequence                                                                                       | Score                             | Length | Start | End | Modifications | Peptide Sequence                    | Score | Length | Start                                                                  | End  | Modifications |  |
|-------|------------------------------|----------------------------------------------------------------------------------------------------------------------------------|-------|--------|-------|-----|---------------|--------------------------------------------------------------------------------------------------------|-----------------------------------|--------|-------|-----|---------------|-------------------------------------|-------|--------|------------------------------------------------------------------------|------|---------------|--|
|       |                              |                                                                                                                                  |       |        |       |     |               | VALEGNATLDFDIASNVKK                                                                                    | 26.1                              |        |       |     |               | VALEGNATLDFDIASNVKK                 | 57.6  |        |                                                                        |      |               |  |
|       |                              |                                                                                                                                  |       |        |       |     |               | VALEGNATLDFDIASNVK Deamidated (N6)                                                                     |                                   |        |       |     |               | VALEGNATLDFDIASNVK Deamidated (N6)  | 12.5  |        |                                                                        |      |               |  |
|       |                              |                                                                                                                                  |       |        |       |     |               | VALEGNATLDFDIASNVKK Deamidated (N6)                                                                    |                                   |        |       |     |               | VALEGNATLDFDIASNVKK Deamidated (N6) | 63.2  |        |                                                                        |      |               |  |
|       |                              |                                                                                                                                  |       |        |       |     |               | VALEGNATLDFDIASNVKK Deamidated (N6)                                                                    |                                   |        |       |     |               | VALEGNATLDFDIASNVKK Deamidated (N6) | 40.9  |        |                                                                        |      |               |  |
| 40    | Tb927.10.1510                | NOT1                                                                                                                             | 1.00  | 661    | 42    | 18  | 15            | 11.0                                                                                                   | 4FLAVGQNP                         | 32.1   | 1.00  | 601 | 30            | 13                                  | 12    | 10.2   | ADPPTISALAFIEQLLK                                                      | 34.9 |               |  |
|       |                              |                                                                                                                                  |       |        |       |     |               | ANRPLGANNPEPKPKDMSVSGGALAFEAQPR Oxidation (M18)                                                        | 19.9                              |        |       |     |               |                                     |       |        | ALEWDAEEGAK                                                            | 8.5  |               |  |
|       |                              |                                                                                                                                  |       |        |       |     |               | ASPSALNLVEQHR                                                                                          | 58.4                              |        |       |     |               |                                     |       |        | ATAALNTFLASSLKDLLR                                                     | 86.3 |               |  |
|       |                              |                                                                                                                                  |       |        |       |     |               | AVYEFEFNSVPPVGLLIAYVR                                                                                  | 32.8                              |        |       |     |               |                                     |       |        | AVYEFEFNSVPPVGLLIAYVR                                                  | 27.7 |               |  |
|       |                              |                                                                                                                                  |       |        |       |     |               | NAQQQVQGSSTGASASTATQGK                                                                                 | 45.1                              |        |       |     |               |                                     |       |        | AWTLPLAPKQFDTLVEVYGALEQKQPR                                            | 37.4 |               |  |
|       |                              |                                                                                                                                  |       |        |       |     |               | NAQQQVQGSSTGASASTATQGK Deamidated (N1)                                                                 | 32.7                              |        |       |     |               |                                     |       |        | FAWATSIVEAEQLDKQK                                                      | 56.2 |               |  |
|       |                              |                                                                                                                                  |       |        |       |     |               | QGVVDFAGALS                                                                                            | 18.7                              |        |       |     |               |                                     |       |        | NAQQQVQGSSTGASASTATQGK Deamidated (N1)                                 | 9.7  |               |  |
|       |                              |                                                                                                                                  |       |        |       |     |               | RLVPTLAPKQGEAEKIR                                                                                      | 31.7                              |        |       |     |               |                                     |       |        | RLVPTLAPKQGEAEKIR                                                      | 37.4 |               |  |
|       |                              |                                                                                                                                  |       |        |       |     |               | RPPVITPETVIR                                                                                           | 24.8                              |        |       |     |               |                                     |       |        | RPPVITPETVIR                                                           | 17.1 |               |  |
|       |                              |                                                                                                                                  |       |        |       |     |               | RPPVITPETVIRVSEEAELFGER                                                                                | 28.4                              |        |       |     |               |                                     |       |        | RPPVITPETVIRVSEEAELFGER                                                | 49.9 |               |  |
|       |                              |                                                                                                                                  |       |        |       |     |               | SLASNLCTVARDALPEFPN/QVQDLISR Carbamidomethyl (C7)                                                      | 47.8                              |        |       |     |               |                                     |       |        | SLASNLCTVARDALPEFPN/QVQDLISR Carbamidomethyl (C7)                      | 69.3 |               |  |
|       |                              |                                                                                                                                  |       |        |       |     |               | SLASNLCTVARDALPEFPN/QVQDLISR Carbamidomethyl (C7) Deamidated (N20)                                     | 44.9                              |        |       |     |               |                                     |       |        | SLASNLCTVARDALPEFPN/QVQDLISR Carbamidomethyl (C7) Deamidated (N20)     | 34.9 |               |  |
|       |                              |                                                                                                                                  |       |        |       |     |               | SLASNLCTVARDALPEFPN/QVQDLISR Deamidated (N5) Carbamidomethyl (C7)                                      | 45.2                              |        |       |     |               |                                     |       |        | SLASNLCTVARDALPEFPN/QVQDLISR Deamidated (N5) Carbamidomethyl (C7)      | 15.6 |               |  |
|       |                              |                                                                                                                                  |       |        |       |     |               | TLEDATVQHYSTGDAK                                                                                       | 18.3                              |        |       |     |               |                                     |       |        | TLEDATVQHYSTGDAK                                                       |      |               |  |
|       |                              |                                                                                                                                  |       |        |       |     |               | TTQQQKEVESLSDPWALSTERR                                                                                 | 7.9                               |        |       |     |               |                                     |       |        | TTQQQKEVESLSDPWALSTERR                                                 |      |               |  |
|       |                              |                                                                                                                                  |       |        |       |     |               | VAAATLHQHDIGTLSSK                                                                                      | 38.2                              |        |       |     |               |                                     |       |        | VAAATLHQHDIGTLSSK                                                      |      |               |  |
|       |                              |                                                                                                                                  |       |        |       |     |               | VAAATLHQHDIGTLSSK                                                                                      | 24.6                              |        |       |     |               |                                     |       |        | VAAATLHQHDIGTLSSK                                                      |      |               |  |
|       |                              |                                                                                                                                  |       |        |       |     |               | VTQELKPTVGR                                                                                            | 29.3                              |        |       |     |               |                                     |       |        | VTQELKPTVGR                                                            |      |               |  |
| 41    | Tb927.2.1560<br>Tb927.2.1680 | cyclophilin-type peptidyl-prolyl cis-trans isomerase, putative<br>cyclophilin-type peptidyl-prolyl cis-trans isomerase, putative | 0.98  | 742    | 20    | 10  | 6             | 66.8                                                                                                   | AGKHFGPGLTSMANAGR Oxidation (M12) | 9.7    | 0.00  | 0   | 0             | 0                                   | 0     | 0.0    |                                                                        |      |               |  |
|       |                              |                                                                                                                                  |       |        |       |     |               | AGRVEMELFKDVPK Oxidation (M6)                                                                          | 24.5                              |        |       |     |               |                                     |       |        |                                                                        |      |               |  |
|       |                              |                                                                                                                                  |       |        |       |     |               | ALCTYGEKGLGR Carbamidomethyl (C3)                                                                      | 39.4                              |        |       |     |               |                                     |       |        |                                                                        |      |               |  |
|       |                              |                                                                                                                                  |       |        |       |     |               | RPIYVWNSVLYVDSIGSK                                                                                     | 49.2                              |        |       |     |               |                                     |       |        |                                                                        |      |               |  |
|       |                              |                                                                                                                                  |       |        |       |     |               | NTNGSFFICTAATPWLDGKHVFGQVTK Deamidated (N3) Carbamidomethyl (C10)                                      | 69.7                              |        |       |     |               |                                     |       |        |                                                                        |      |               |  |
|       |                              |                                                                                                                                  |       |        |       |     |               | VIPQFMCGGDDFTSGNGTGGESYGLKFPDEFAGR Carbamidomethyl (C7) Deamidated (Q8)                                | 110.5                             |        |       |     |               |                                     |       |        |                                                                        |      |               |  |
|       |                              |                                                                                                                                  |       |        |       |     |               | VIPQFMCGGDDFTSGNGTGGESYGLKFPDEFAGR Carbamidomethyl (C7) Deamidated (Q8) Deamidated (N16)               | 122.3                             |        |       |     |               |                                     |       |        |                                                                        |      |               |  |
|       |                              |                                                                                                                                  |       |        |       |     |               | VIPQFMCGGDDFTSGNGTGGESYGLKFPDEFAGR Deamidated (Q4) Deamidated (Q8) Oxidation (M6) Carbamidomethyl (C7) | 97.2                              |        |       |     |               |                                     |       |        |                                                                        |      |               |  |
|       |                              |                                                                                                                                  |       |        |       |     |               | VIPQFMCGGDDFTSGNGTGGESYGLKFPDEFAGR Oxidation (M6) Carbamidomethyl (C7)                                 | 102.3                             |        |       |     |               |                                     |       |        |                                                                        |      |               |  |
|       |                              |                                                                                                                                  |       |        |       |     |               | VIPQFMCGGDDFTSGNGTGGESYGLKFPDEFAGR Oxidation (M6) Carbamidomethyl (C7) Deamidated (N16)                | 56.9                              |        |       |     |               |                                     |       |        |                                                                        |      |               |  |
| 42    | Tb927.3.3580                 | lipophosphoglycan biosynthetic protein, putative                                                                                 | 1.00  | 680    | 58    | 14  | 12            | 21.9                                                                                                   | AVFLRELISNGSDALDKR                | 62.8   | 1.00  | 798 | 62            | 19                                  | 15    | 22.3   | AVFLRELISNGSDALDKR                                                     | 0.3  |               |  |
|       |                              |                                                                                                                                  |       |        |       |     |               | AVFLRELISNGSDALDKR Deamidated (N10)                                                                    | 52.4                              |        |       |     |               |                                     |       |        | AVFLRELISNGSDALDKR Deamidated (N10)                                    | 17.6 |               |  |
|       |                              |                                                                                                                                  |       |        |       |     |               | IGQVIMTRIELEANLSSLGSSGTR Oxidation (M6)                                                                | 11.1                              |        |       |     |               |                                     |       |        | ELISNGSDALDKR                                                          | 60.8 |               |  |
|       |                              |                                                                                                                                  |       |        |       |     |               | ELISNGSDALDKR                                                                                          | 30.4                              |        |       |     |               |                                     |       |        | ELISNGSDALDKR Deamidated (N5)                                          | 41.9 |               |  |
|       |                              |                                                                                                                                  |       |        |       |     |               | FRPLTDALTR                                                                                             | 39.2                              |        |       |     |               |                                     |       |        | FRPLTDALTR                                                             | 35.2 |               |  |
|       |                              |                                                                                                                                  |       |        |       |     |               | GVEVLLMTDADEYVGGVDFANK Oxidation (M7)                                                                  | 15.8                              |        |       |     |               |                                     |       |        | GKSPYQAEVSK                                                            | 11.5 |               |  |
|       |                              |                                                                                                                                  |       |        |       |     |               | HPVVQQLAR                                                                                              | 17.1                              |        |       |     |               |                                     |       |        | GTETLELFPDLNLSPETVR                                                    | 43.8 |               |  |
|       |                              |                                                                                                                                  |       |        |       |     |               | KLINATDSAGLDDVTDKQK                                                                                    | 43.9                              |        |       |     |               |                                     |       |        | GVEVLLMTDADEYVGGVDFANK                                                 | 47.1 |               |  |
|       |                              |                                                                                                                                  |       |        |       |     |               | KLINATDSAGLDDVTDKQK                                                                                    | 48.9                              |        |       |     |               |                                     |       |        | GVEVLLMTDADEYVGGVDFANK                                                 | 57.8 |               |  |
|       |                              |                                                                                                                                  |       |        |       |     |               | LSVPEKTLTLR                                                                                            | 49.2                              |        |       |     |               |                                     |       |        | HPVVQQLAR                                                              | 24.7 |               |  |
|       |                              |                                                                                                                                  |       |        |       |     |               | MLDLHSLYTNR                                                                                            | 59.8                              |        |       |     |               |                                     |       |        | HPVVQQLAR Deamidated (Q6)                                              | 14.5 |               |  |
|       |                              |                                                                                                                                  |       |        |       |     |               | MLDLHSLYTNR Oxidation (M1)                                                                             | 47.6                              |        |       |     |               |                                     |       |        | KLINATDSAGLDDVTDKQK                                                    | 33.2 |               |  |
|       |                              |                                                                                                                                  |       |        |       |     |               | MLYLLTPKEPKVKGGEAPTMDIR Oxidation (M1) Oxidation (M20)                                                 | 20.5                              |        |       |     |               |                                     |       |        | KLINATDSAGLDDVTDKQK                                                    | 58.3 |               |  |
|       |                              |                                                                                                                                  |       |        |       |     |               | QYSEFVHPFR                                                                                             | 30.8                              |        |       |     |               |                                     |       |        | LSVPEK                                                                 | 21.0 |               |  |
|       |                              |                                                                                                                                  |       |        |       |     |               |                                                                                                        |                                   |        |       |     |               |                                     |       |        | LSVPEKTLTLR                                                            | 1.1  |               |  |
|       |                              |                                                                                                                                  |       |        |       |     |               |                                                                                                        |                                   |        |       |     |               |                                     |       |        | MLDLHSLYTNR                                                            | 49.0 |               |  |
|       |                              |                                                                                                                                  |       |        |       |     |               |                                                                                                        |                                   |        |       |     |               |                                     |       |        | QYSEFVHPFR                                                             | 33.7 |               |  |
|       |                              |                                                                                                                                  |       |        |       |     |               |                                                                                                        |                                   |        |       |     |               |                                     |       |        | QYSEFVHPFR Deamidated (Q1)                                             | 32.6 |               |  |
|       |                              |                                                                                                                                  |       |        |       |     |               |                                                                                                        |                                   |        |       |     |               |                                     |       |        | RGEEDVLENENQPIWTR                                                      | 32.1 |               |  |
| 43    | Tb927.1.1790                 | pyruvate dehydrogenase E1 beta subunit, putative                                                                                 | 1.00  | 881    | 70    | 17  | 16            | 40.8                                                                                                   | AAEQLKSSIEAEVNL                   | 35.0   | 1.00  | 567 | 35            | 13                                  | 11    | 46.0   | AARDNPVVALEHLYMGETFKVSEAMGEDVFPFGK                                     | 60.8 |               |  |
|       |                              |                                                                                                                                  |       |        |       |     |               | AKIERPGKDTMIGFSR Oxidation (M12)                                                                       | 25.1                              |        |       |     |               |                                     |       |        | AARDNPVVALEHLYMGETFKVSEAMGEDVFPFGK Oxidation (M29)                     | 37.1 |               |  |
|       |                              |                                                                                                                                  |       |        |       |     |               | ATIQSVK                                                                                                | 47.9                              |        |       |     |               |                                     |       |        | AKIERPGKDTMIGFSR Oxidation (M12)                                       | 6.7  |               |  |
|       |                              |                                                                                                                                  |       |        |       |     |               | ATIQSVKTR                                                                                              | 36.0                              |        |       |     |               |                                     |       |        | ATIQSVK                                                                | 29.5 |               |  |
|       |                              |                                                                                                                                  |       |        |       |     |               | DALNSAEELSRDKTVLVEEVQVGGYK                                                                             | 24.2                              |        |       |     |               |                                     |       |        | DALNSAEELSRDKTVLVEEVQVGGYK                                             | 52.7 |               |  |
|       |                              |                                                                                                                                  |       |        |       |     |               | GLVDKYGTSR                                                                                             | 27.6                              |        |       |     |               |                                     |       |        | GLVDKYGTSR                                                             | 49.6 |               |  |
|       |                              |                                                                                                                                  |       |        |       |     |               | NLEVASQVSDVLDWAR                                                                                       | 62.5                              |        |       |     |               |                                     |       |        | NLEVASQVSDVLDWAR                                                       | 44.6 |               |  |
|       |                              |                                                                                                                                  |       |        |       |     |               | NLEVASQVSDVLDWARR                                                                                      | 27.6                              |        |       |     |               |                                     |       |        | NLEVASQVSDVLDWARR                                                      | 35.0 |               |  |
|       |                              |                                                                                                                                  |       |        |       |     |               | SGIEAEVNL                                                                                              | 73.7                              |        |       |     |               |                                     |       |        | NLEVASQVSDVLDWARR Deamidated (Q9)                                      | 17.3 |               |  |
|       |                              |                                                                                                                                  |       |        |       |     |               | SGIEAEVNLR Deamidated (N9)                                                                             | 56.8                              |        |       |     |               |                                     |       |        | SGIEAEVNL                                                              | 54.0 |               |  |
|       |                              |                                                                                                                                  |       |        |       |     |               | SLRPLDRATHQGVK                                                                                         | 24.2                              |        |       |     |               |                                     |       |        | VFSPIYSEEDAR                                                           | 16.0 |               |  |
|       |                              |                                                                                                                                  |       |        |       |     |               | SLRPLDRATHQGVK                                                                                         | 29.4                              |        |       |     |               |                                     |       |        | VSCADCFPYSKNLEVASQVSDVLDWARR Carbamidomethyl (C3) Carbamidomethyl (C6) | 28.2 |               |  |
|       |                              |                                                                                                                                  |       |        |       |     |               | VFSPIYSEEDAR                                                                                           | 23.9                              |        |       |     |               |                                     |       |        | VSCADCFPYSKNLEVASQVSDVLDWARR Carbamidomethyl (C3) Carbamidomethyl (C6) | 20.9 |               |  |
|       |                              |                                                                                                                                  |       |        |       |     |               | VFSPIYSEEDARGLK Oxidation (M13)                                                                        | 28.3                              |        |       |     |               |                                     |       |        | VSCADCFPYSKNLEVASQVSDVLDWARR Carbamidomethyl (C3) Carbamidomethyl (C6) | 16.0 |               |  |
|       |                              |                                                                                                                                  |       |        |       |     |               | VSCADCFPYSK Carbamidomethyl (C3) Carbamidomethyl (C6)                                                  | 37.0                              |        |       |     |               |                                     |       |        | VSCADCFPYSK Carbamidomethyl (C3) Carbamidomethyl (C6)                  | 28.2 |               |  |
|       |                              |                                                                                                                                  |       |        |       |     |               | VSCADCFPYSKNLEVASQVSDVLDWAR Carbamidomethyl (C3) Carbamidomethyl (C6)                                  | 59.5                              |        |       |     |               |                                     |       |        | VSCADCFPYSKNLEVASQVSDVLDWAR Carbamidomethyl (C3) Carbamidomethyl (C6)  | 20.9 |               |  |
|       |                              |                                                                                                                                  |       |        |       |     |               | VSCADCFPYSKNLEVASQVSDVLDWARR Carbamidomethyl (C3) Carbamidomethyl (C6)                                 | 73.9                              |        |       |     |               |                                     |       |        | VSCADCFPYSKNLEVASQVSDVLDWARR Carbamidomethyl (C3) Carbamidomethyl (C6) | 20.9 |               |  |
| 44    | Tb927.10.7570                | dihydroisopimide acetyltransferase E2 subunit, putative                                                                          | 1.00  | 560    | 39    | 15  | 13            | 42.6                                                                                                   | ANMLVFEANSSHWGDFIR Oxidation (M3) | 34.9   | 1.00  | 549 | 27            | 11                                  | 10    | 37.7   | ANMLVFEANSSHWGDFIR Oxidation (M3)                                      | 3.6  |               |  |
|       |                              |                                                                                                                                  |       |        |       |     |               | EHAAPAAAPAKPVVPIATPSTQNYTDPVTNMR                                                                       | 67.1                              |        |       |     |               |                                     |       |        | EHAAPAAAPAKPVVPIATPSTQNYTDPVTNMR                                       | 59.4 |               |  |
|       |                              |                                                                                                                                  |       |        |       |     |               | EHAAPAAAPAKPVVPIATPSTQNYTDPVTNMR Deamidated (N34)                                                      | 23.5                              |        |       |     |               |                                     |       |        | EHAAPAAAPAKPVVPIATPSTQNYTDPVTNMR Deamidated (N26)                      | 41.2 |               |  |
|       |                              |                                                                                                                                  |       |        |       |     |               | EHAAPAAAPAKPVVPIATPSTQNYTDPVTNMR Oxidation (M35)                                                       | 76.4                              |        |       |     |               |                                     |       |        | FTASFDR                                                                | 42.3 |               |  |
|       |                              |                                                                                                                                  |       |        |       |     |               | FTASFDR                                                                                                | 42.9                              |        |       |     |               |                                     |       |        | FTASFDRVQVAGASQWCK Deamidated (C17) Carbamidomethyl (C19)              | 49.6 |               |  |
|       |                              |                                                                                                                                  |       |        |       |     |               | FTASFDRVQVAGASQWCK Deamidated (C17) Carbamidomethyl (C19)                                              | 12.2                              |        |       |     |               |                                     |       |        | FKDAVENLSLL                                                            | 47.0 |               |  |
|       |                              |                                                                                                                                  |       |        |       |     |               | GRISEWVK                                                                                               | 44.7                              |        |       |     |               |                                     |       |        | IKRQVEAASK                                                             | 32.6 |               |  |
|       |                              |                                                                                                                                  |       |        |       |     |               | GLVDSNEMK Oxidation (M8)                                                                               | 9.2                               |        |       |     |               |                                     |       |        | KTAELNLSLDTDTGGQGR                                                     | 36.8 |               |  |
|       |                              |                                                                                                                                  |       |        |       |     |               | GLVDSNEMKVLAK Oxidation (M9)                                                                           | 22.5                              |        |       |     |               |                                     |       |        | TVDSWATPTGLTIPIKQADAR                                                  | 33.2 |               |  |
|       |                              |                                                                                                                                  |       |        |       |     |               | FKDAVENLSLL                                                                                            | 40.2                              |        |       |     |               |                                     |       |        | VQEVPSPTQVAPLPAQGEAAGR                                                 | 17.2 |               |  |
|       |                              |                                                                                                                                  |       |        |       |     |               | IKRQVEAASK                                                                                             | 41.2                              |        |       |     |               |                                     |       |        | VQEVPSPTQVAPLPAQGEAAGR                                                 | 52.3 |               |  |
|       |                              |                                                                                                                                  |       |        |       |     |               | KTAKLN                                                                                                 |                                   |        |       |     |               |                                     |       |        |                                                                        |      |               |  |



Peptides

| Accession                                                         | Protein Name                                                           | Start                                 | End  | Score | Modifications | Accession | Protein Name | Start                                                                                | End                                          | Score                                                             | Modifications | Accession | Protein Name | Start | End  | Score                                | Modifications |
|-------------------------------------------------------------------|------------------------------------------------------------------------|---------------------------------------|------|-------|---------------|-----------|--------------|--------------------------------------------------------------------------------------|----------------------------------------------|-------------------------------------------------------------------|---------------|-----------|--------------|-------|------|--------------------------------------|---------------|
| 54                                                                | Tb927.10.2010 hexokinase                                               | 0.99                                  | 407  | 21    | 10            | 9         | 30.6         | AGLSASFCAPLVK Carbamidomethyl (C9); Carbamidomethyl (C10)                            | 58.3                                         | 0.98                                                              | 410           | 25        | 10           | 10    | 34.0 | ATIADGVSFEKIPSPFR                    | 4.2           |
|                                                                   |                                                                        |                                       |      |       |               |           |              | FRAGMISDRPFLGQIFTR Oxidation (M4); Oxidation (M10)                                   | 21.9                                         | ATIADGVSFEKIPSPFR                                                 |               |           |              |       |      | 27.1                                 |               |
|                                                                   |                                                                        |                                       |      |       |               |           |              | FVLPPTKFDLDDIDASLNKGGQALEK Deamidated (Q21)                                          | 37.9                                         | FVLPPTKFDLDDIDASLNKGGQALEK                                        |               |           |              |       |      | 68.8                                 |               |
|                                                                   |                                                                        |                                       |      |       |               |           |              | FVLPPTKFDLDDIDASLNKGGQALEK Deamidated (Q22)                                          | 53.5                                         | QIMTYLYEMVEGLEGR                                                  |               |           |              |       |      | 35.9                                 |               |
|                                                                   |                                                                        |                                       |      |       |               |           |              | GSALTPNMEISGNFDSKVR Oxidation (M9)                                                   | 36.1                                         | RLNLEHISGQNDGETVR                                                 |               |           |              |       |      | 29.3                                 |               |
|                                                                   |                                                                        |                                       |      |       |               |           |              | IRDQCR Carbamidomethyl (C9)                                                          | 22.2                                         | RLGQDNR                                                           |               |           |              |       |      | 34.2                                 |               |
|                                                                   |                                                                        |                                       |      |       |               |           |              | RLNLEHISGQNDGETVR                                                                    | 20.4                                         | TVPLGFTTFFVEGTQ                                                   |               |           |              |       |      | 25.3                                 |               |
|                                                                   |                                                                        |                                       |      |       |               |           |              | RVVHLSINCLPAALQALGNR Carbamidomethyl (C11)                                           | 53.2                                         | VACKGAVVDSSTAFKIPK Carbamidomethyl (C3)                           |               |           |              |       |      | 13.2                                 |               |
|                                                                   |                                                                        |                                       |      |       |               |           |              | RVVHLSINCLPAALQALGNR Carbamidomethyl (C10)                                           | 29.2                                         | VCGVDVGSIEDLR Carbamidomethyl (C2); Deamidated (Q7)               |               |           |              |       |      | 65.3                                 |               |
|                                                                   |                                                                        |                                       |      |       |               |           |              | VLDGNNRLLGPEQVVR Carbamidomethyl (C14)                                               | 25.5                                         | VVHLSINCLPAALQALGNR Carbamidomethyl (C10)                         |               |           |              |       |      | 29.3                                 |               |
| 55                                                                | Tb927.8.1740 hypothetical protein, conserved                           | 1.00                                  | 350  | 26    | 9             | 8         | 17.6         | AELTAKSPVAPSPQR                                                                      | 53.7                                         | 1.00                                                              | 391           | 15        | 8            | 5     | 16.0 | ARPDFVALLTQGR                        | 50.2          |
|                                                                   |                                                                        |                                       |      |       |               |           |              | AISASPSIVRR                                                                          | 33.4                                         | LVDVLLFQHFGEAEPATDNDNNGIGPAATK Deamidated (N22); Deamidated (N23) |               |           |              |       |      | 62.8                                 |               |
|                                                                   |                                                                        |                                       |      |       |               |           |              | ARPDFVALLTQGR                                                                        | 50.8                                         | LVDVLLFQHFGEAEPATDNDNNGIGPAATK Deamidated (N23)                   |               |           |              |       |      | 52.5                                 |               |
|                                                                   |                                                                        |                                       |      |       |               |           |              | LVDVLLFQHFGEAEPATDNDNNGIGPAATK Deamidated (N22); Deamidated (N23)                    | 7.5                                          | LVDVLLFQHFGEAEPATDNDNNGIGPAATK Deamidated (N20)                   |               |           |              |       |      | 55.9                                 |               |
|                                                                   |                                                                        |                                       |      |       |               |           |              | LVDVLLFQHFGEAEPATDNDNNGIGPAATK Deamidated (N20)                                      | 23.7                                         | LVDVLLFQHFGEAEPATDNDNNGIGPAATK Deamidated (N22); Deamidated (N23) |               |           |              |       |      | 38.3                                 |               |
|                                                                   |                                                                        |                                       |      |       |               |           |              | LVDVLLFQHFGEAEPATDNDNNGIGPAATK Deamidated (N23)                                      | 29.5                                         | LVDVLLFQHFGEAEPATDNDNNGIGPAATK Deamidated (N23)                   |               |           |              |       |      | 18.8                                 |               |
|                                                                   |                                                                        |                                       |      |       |               |           |              | SPVYAPSPQR                                                                           | 32.5                                         | TALLSAGNSGTHPELVLMNAGPVRK Deamidated (N8)                         |               |           |              |       |      | 24.6                                 |               |
|                                                                   |                                                                        |                                       |      |       |               |           |              | SSGKAELTTAKSPVAPSPQR                                                                 | 39.6                                         | YAPLLHTESLQGAAGSVSK                                               |               |           |              |       |      | 52.6                                 |               |
|                                                                   |                                                                        |                                       |      |       |               |           |              | TALLSAGNSGTHPELVLMNAGPVRK Oxidation (M19)                                            | 44.5                                         |                                                                   |               |           |              |       |      |                                      |               |
|                                                                   |                                                                        |                                       |      |       |               |           |              | 56                                                                                   | Tb927.8.6110 hypothetical protein, conserved | 1.00                                                              |               |           |              |       |      | 414                                  | 31            |
| DAFTMTKRVK Oxidation (M5)                                         | 25.6                                                                   | ALKELGMPALSR Oxidation (M7)           | 12.6 |       |               |           |              |                                                                                      |                                              |                                                                   |               |           |              |       |      |                                      |               |
| GLHTSSLDKFAAKR                                                    | 22.6                                                                   | CLHTSSLDKFAAKR                        | 29.7 |       |               |           |              |                                                                                      |                                              |                                                                   |               |           |              |       |      |                                      |               |
| HACLSGVYALKGAAR Carbamidomethyl (C3)                              | 21.0                                                                   | IGTRNEAFQDIEIYR                       | 37.6 |       |               |           |              |                                                                                      |                                              |                                                                   |               |           |              |       |      |                                      |               |
| IGTRNEAFQDIEIYR                                                   | 49.4                                                                   | ILSEALGNSILTEEQYK                     | 64.9 |       |               |           |              |                                                                                      |                                              |                                                                   |               |           |              |       |      |                                      |               |
| IKDTIKRMMVMVGGSDASEAIPTPKGWEEAAAK Oxidation (M9); Oxidation (M11) | 47.9                                                                   | LLNVYEVPSR Deamidated (N4)            | 7.2  |       |               |           |              |                                                                                      |                                              |                                                                   |               |           |              |       |      |                                      |               |
| LLELNTK                                                           | 25.4                                                                   | STAEHTKTFEELCK Carbamidomethyl (C14)  | 23.1 |       |               |           |              |                                                                                      |                                              |                                                                   |               |           |              |       |      |                                      |               |
| VLRSKVFADFLGSK                                                    | 51.3                                                                   |                                       |      |       |               |           |              |                                                                                      |                                              |                                                                   |               |           |              |       |      |                                      |               |
| VSNVGDSPFRVPSNENAVTMAASAVLR Oxidation (M21)                       | 59.5                                                                   |                                       |      |       |               |           |              |                                                                                      |                                              |                                                                   |               |           |              |       |      |                                      |               |
| YAEVGGDDKLAHVAASDAEVALGSGTEGTGGAGSVMVLYOK Oxidation (M39)         | 19.2                                                                   |                                       |      |       |               |           |              |                                                                                      |                                              |                                                                   |               |           |              |       |      |                                      |               |
| 57                                                                | Tb927.10.2960 mitochondrial malate dehydrogenase                       | 1.00                                  | 521  | 37    | 12            | 10        | 44.0         | AGVDFARLFGITLDVVR                                                                    | 35.2                                         | 1.00                                                              | 737           | 69        | 16           | 10    | 51.3 | AGVDFARLFGITLDVVR                    | 25.8          |
|                                                                   |                                                                        |                                       |      |       |               |           |              | ALIGVSNPNSVPIASEVKK                                                                  | 38.2                                         | ALIGVSNPNSVPIASEVKK                                               |               |           |              |       |      | 6.5                                  |               |
|                                                                   |                                                                        |                                       |      |       |               |           |              | ALIGVSNPNSVPIASEVKK Deamidated (N8)                                                  | 34.8                                         | ALIGVSNPNSVPIASEVKK Deamidated (N11)                              |               |           |              |       |      | 28.2                                 |               |
|                                                                   |                                                                        |                                       |      |       |               |           |              | ALIGVSNPNSVPIASEVKK                                                                  | 28.7                                         | ALIGVSNPNSVPIASEVKK Deamidated (N8)                               |               |           |              |       |      | 8.8                                  |               |
|                                                                   |                                                                        |                                       |      |       |               |           |              | ALIGVSNPNSVPIASEVKK Deamidated (N11)                                                 | 47.4                                         | ALIGVSNPNSVPIASEVKK                                               |               |           |              |       |      | 32.7                                 |               |
|                                                                   |                                                                        |                                       |      |       |               |           |              | ARTYVAEAAIK                                                                          | 34.8                                         | IRKPDFVDESLLEK                                                    |               |           |              |       |      | 34.9                                 |               |
|                                                                   |                                                                        |                                       |      |       |               |           |              | AVDQADVIRPAGTFR                                                                      | 27.3                                         | LFGITLDVVR                                                        |               |           |              |       |      | 41.2                                 |               |
|                                                                   |                                                                        |                                       |      |       |               |           |              | GGVEKHPVFDAYEQLLEK                                                                   | 13.2                                         | SPYDNNVQVGGHSGPTIPLLSQAGVSLTEEQVK                                 |               |           |              |       |      | 60.1                                 |               |
|                                                                   |                                                                        |                                       |      |       |               |           |              | HRPFDVYEGSLLEK                                                                       | 32.7                                         | SPYDNNVQVGGHSGPTIPLLSQAGVSLTEEQVK Deamidated (Q8)                 |               |           |              |       |      | 28.4                                 |               |
|                                                                   |                                                                        |                                       |      |       |               |           |              | LFGITLDVVR                                                                           | 33.1                                         | TFVAEAAKSPYDNNVQVGGHSGPTIPLLSQAGVSLTEEQVK                         |               |           |              |       |      | 49.7                                 |               |
| 58                                                                | Tb927.10.4560 elongation factor 2<br>Tb927.10.4570 elongation factor 2 | 1.00                                  | 506  | 58    | 14            | 12        | 20.3         | AYLPVAESFGTADLR                                                                      | 16.4                                         | 0.99                                                              | 444           | 20        | 10           | 9     | 16.9 | ETVTDVSSIQGLSK Carbamidomethyl (C11) | 47.4          |
|                                                                   |                                                                        |                                       |      |       |               |           |              | FLADKFEVDVAEAR                                                                       | 9.1                                          | FLADKFEVDVAEAR                                                    |               |           |              |       |      | 47.4                                 |               |
|                                                                   |                                                                        |                                       |      |       |               |           |              | FLPAMEILLQRIWHLRPSK Oxidation (M11)                                                  | 30.0                                         | GTWASISSLQANWVSVTRFAKMAK Oxidation (M22)                          |               |           |              |       |      | 40.4                                 |               |
|                                                                   |                                                                        |                                       |      |       |               |           |              | GLKPDQLDITLQDK                                                                       | 19.8                                         | GVIGEENRPGTTRVNR                                                  |               |           |              |       |      | 20.8                                 |               |
|                                                                   |                                                                        |                                       |      |       |               |           |              | GVIGEENRPGTTRVNR                                                                     | 24.4                                         | GVIGEENRPGTTRVNR Deamidated (N8)                                  |               |           |              |       |      | 20.8                                 |               |
|                                                                   |                                                                        |                                       |      |       |               |           |              | KGLKPDFGLDITLQDK                                                                     | 32.2                                         | KGLKPDFGLDITLQDK                                                  |               |           |              |       |      | 43.9                                 |               |
|                                                                   |                                                                        |                                       |      |       |               |           |              | RDVIGEENRPGTTRVNR                                                                    | 30.4                                         | RDVIGEENRPGTTRVNR                                                 |               |           |              |       |      | 22.8                                 |               |
|                                                                   |                                                                        |                                       |      |       |               |           |              | RVFYACGLTATR Carbamidomethyl (C5); Carbamidomethyl (C7)                              | 29.8                                         | STLSDSLVAAGIK                                                     |               |           |              |       |      | 59.1                                 |               |
|                                                                   |                                                                        |                                       |      |       |               |           |              | SATITDDGESPHLRDMKYSVSPVVR Oxidation (M17)                                            | 25.9                                         | VWEAKNPISLPK                                                      |               |           |              |       |      | 47.5                                 |               |
|                                                                   |                                                                        |                                       |      |       |               |           |              | VWEAKNPISLPK                                                                         | 41.9                                         | YGEAEDMPCGNVGLVGVDKYVK Carbamidomethyl (C10)                      |               |           |              |       |      | 35.3                                 |               |
| VWEAKNPISLPK Deamidated (N7)                                      | 52.6                                                                   |                                       |      |       |               |           |              |                                                                                      |                                              |                                                                   |               |           |              |       |      |                                      |               |
| VNFTVDEVR                                                         | 48.8                                                                   |                                       |      |       |               |           |              |                                                                                      |                                              |                                                                   |               |           |              |       |      |                                      |               |
| YGEAEDMPCGNVGLVGVDKYVK Carbamidomethyl (C10)                      | 12.4                                                                   |                                       |      |       |               |           |              |                                                                                      |                                              |                                                                   |               |           |              |       |      |                                      |               |
| YGEAEDMPCGNVGLVGVDKYVK Oxidation (M8); Carbamidomethyl (C10)      | 21.9                                                                   |                                       |      |       |               |           |              |                                                                                      |                                              |                                                                   |               |           |              |       |      |                                      |               |
| 59                                                                | Tb927.6.2230 hypothetical protein, conserved                           | 1.00                                  | 315  | 18    | 8             | 7         | 12.7         | ARVDPSTQDEKSVTLNCAATFR Carbamidomethyl (C19)                                         | 28.1                                         | 1.00                                                              | 122           | 5         | 3            | 3     | 10.3 | AATVGFHTDEIQELLEAVSYRDPQK            | 38.9          |
|                                                                   |                                                                        |                                       |      |       |               |           |              | KTMTNENLVAWSQPQAKVVEVLSHQTR Oxidation (M4)                                           | 30.2                                         | ARVDPSTQDEKSVTLNCAATFR Carbamidomethyl (C19)                      |               |           |              |       |      | 26.2                                 |               |
|                                                                   |                                                                        |                                       |      |       |               |           |              | LEDVGSAPRELLK                                                                        | 29.0                                         | KTMTNENLVAWSQPQAKVVEVLSHQTR                                       |               |           |              |       |      | 41.7                                 |               |
|                                                                   |                                                                        |                                       |      |       |               |           |              | NRANDKIALSEQR                                                                        | 31.4                                         |                                                                   |               |           |              |       |      |                                      |               |
|                                                                   |                                                                        |                                       |      |       |               |           |              | TTMENLVAWSQPQAKVVEVLSHQTR Oxidation (M3)                                             | 44.2                                         |                                                                   |               |           |              |       |      |                                      |               |
|                                                                   |                                                                        |                                       |      |       |               |           |              | TTMENLVAWSQPQAKVVEVLSHQTR Oxidation (M3); Deamidated (N5)                            | 39.2                                         |                                                                   |               |           |              |       |      |                                      |               |
|                                                                   |                                                                        |                                       |      |       |               |           |              | VAPFADAASVTTMR Oxidation (M14)                                                       | 42.6                                         |                                                                   |               |           |              |       |      |                                      |               |
|                                                                   |                                                                        |                                       |      |       |               |           |              | VVEVLSHQTR                                                                           | 41.2                                         |                                                                   |               |           |              |       |      |                                      |               |
|                                                                   |                                                                        |                                       |      |       |               |           |              | AYNPNVGSVAMFGFQPTGLVTAIENETGQPVVTR Deamidated (N4); Deamidated (N5); Oxidation (M13) | 20.6                                         |                                                                   |               |           |              |       |      |                                      |               |
|                                                                   |                                                                        |                                       |      |       |               |           |              | HKDSGNICPELPK Carbamidomethyl (C9)                                                   | 20.3                                         |                                                                   |               |           |              |       |      |                                      |               |
| ILASNCPPPPPPPPSPSHR Carbamidomethyl (C6)                          | 59.1                                                                   |                                       |      |       |               |           |              |                                                                                      |                                              |                                                                   |               |           |              |       |      |                                      |               |
| KMLAPGPPFR Oxidation (M2)                                         | 36.8                                                                   |                                       |      |       |               |           |              |                                                                                      |                                              |                                                                   |               |           |              |       |      |                                      |               |
| NRSNESVDNLNGVYSEQLNEVER                                           | 9.2                                                                    |                                       |      |       |               |           |              |                                                                                      |                                              |                                                                   |               |           |              |       |      |                                      |               |
| SGEFDFDPTLPQQPTK                                                  | 24.8                                                                   |                                       |      |       |               |           |              |                                                                                      |                                              |                                                                   |               |           |              |       |      |                                      |               |
| SNEVDNLNGVYSEQLNEVER                                              | 33.7                                                                   |                                       |      |       |               |           |              |                                                                                      |                                              |                                                                   |               |           |              |       |      |                                      |               |
| SSEITAHQGR Deamidated (Q2)                                        | 13.0                                                                   |                                       |      |       |               |           |              |                                                                                      |                                              |                                                                   |               |           |              |       |      |                                      |               |
| VHTPMATHDFGTGGVEDIEPVIHCK Carbamidomethyl (C28)                   | 22.7                                                                   |                                       |      |       |               |           |              |                                                                                      |                                              |                                                                   |               |           |              |       |      |                                      |               |
| 61                                                                | Tb927.10.7020 acid phosphatase, putative                               | 1.00                                  | 370  | 31    | 8             | 8         | 28.5         | ILSQAGAVQZLFPDQVGGVYLR                                                               | 45.7                                         | 1.00                                                              | 418           | 25        | 11           | 9     | 33.1 | GMRVEYELSEYLR Oxidation (M2)         | 11.1          |
|                                                                   |                                                                        |                                       |      |       |               |           |              | LLVTRDGTATVAPHCR carbamidomethyl (C18)                                               | 42.1                                         | BLSAQAWQGLFSDYSPSYLPR                                             |               |           |              |       |      | 61.4                                 |               |
|                                                                   |                                                                        |                                       |      |       |               |           |              | LVPEKSVGEEVPSR                                                                       | 33.6                                         | LILVTPDGTATVAPHCR Carbamidomethyl (C18)                           |               |           |              |       |      | 28.8                                 |               |
|                                                                   |                                                                        |                                       |      |       |               |           |              | NAYRDFGPR                                                                            | 45.3                                         | NAYRDFGPR                                                         |               |           |              |       |      | 39.6                                 |               |
|                                                                   |                                                                        |                                       |      |       |               |           |              | QFQVVFVSDMDTHEYLLDDVPCFR Oxidation (M11); Carbamidomethyl (C23)                      | 15.6                                         | NAYRDFGPR Deamidated (N1)                                         |               |           |              |       |      | 20.7                                 |               |
|                                                                   |                                                                        |                                       |      |       |               |           |              | RKYNVGAEDLTA                                                                         | 18.1                                         | QFQVVFVSDMDTHEYLLDDVPCFR Carbamidomethyl (C23)                    |               |           |              |       |      | 18.0                                 |               |
|                                                                   |                                                                        |                                       |      |       |               |           |              | TPQLCTLKELQDYSAR Carbamidomethyl (C5)                                                | 51.1                                         | QFQVVFVSDMDTHEYLLDDVPCFR Oxidation (M11); Carbamidomethyl (C23)   |               |           |              |       |      | 18.9                                 |               |
|                                                                   |                                                                        |                                       |      |       |               |           |              | YNVGAEDLTA                                                                           | 39.8                                         | RDKKKNLVLTK                                                       |               |           |              |       |      | 35.7                                 |               |
|                                                                   |                                                                        |                                       |      |       |               |           |              |                                                                                      |                                              | RKYNVGAEDLTA                                                      |               |           |              |       |      | 24.5                                 |               |
|                                                                   |                                                                        |                                       |      |       |               |           |              |                                                                                      |                                              | SVGEEVPSR                                                         |               |           |              |       |      | 38.6                                 |               |
|                                                                   |                                                                        | TPQLCTLKELQDYSAR Carbamidomethyl (C5) | 68.4 |       |               |           |              |                                                                                      |                                              |                                                                   |               |           |              |       |      |                                      |               |
| 62                                                                | Tb927.6.4440 hypothetical protein, conserved                           | 1.00                                  | 809  | 61    | 15            | 12        | 35.2         | AAPFVVGASQTTVNVFR                                                                    | 34.9                                         | 1.00                                                              | 234           | 18        | 6            | 6     | 23.0 | AAPFVVGASQTTVNVFR Deamidated (Q10)   | 13.7          |
|                                                                   |                                                                        |                                       |      |       |               |           |              | AAPFVVGASQTTVNVFR Deamidated (N14)                                                   | 28.2                                         | AAPFVVGASQTTVNVFRQK                                               |               |           |              |       |      | 2.3                                  |               |
|                                                                   |                                                                        |                                       |      |       |               |           |              | AAPFVVGASQTTVNVFRQK                                                                  | 38.8                                         | TWASLASIAIK                                                       |               |           |              |       |      | 44.5                                 |               |
|                                                                   |                                                                        |                                       |      |       |               |           |              | APSEPVGERLMSFSDHVTDEELTALGPLAAR                                                      | 29.6                                         | TWASLASIAIKGEORPSIK                                               |               |           |              |       |      | 61.2                                 |               |
|                                                                   |                                                                        |                                       |      |       |               |           |              | APSEPVGERLMSFSDHVTDEELTALGPLAAR Oxidation (M11)                                      | 56.1                                         | VSPSTAAPVAEAVDAPTQPK                                              |               |           |              |       |      | 52.1                                 |               |
|                                                                   |                                                                        |                                       |      |       |               |           |              | GRVSPSTAAPVAEAVDAPTQPK                                                               | 36.8                                         | VANESTANVAKPASPPTK Deamidated (N4)                                |               |           |              |       |      | 22.9                                 |               |
|                                                                   |                                                                        |                                       |      |       |               |           |              | LMSFSDHVTDEELTALGPLAAR                                                               | 14.9                                         |                                                                   |               |           |              |       |      |                                      |               |
|                                                                   |                                                                        |                                       |      |       |               |           |              | TWASLASIAIK                                                                          | 45.8                                         |                                                                   |               |           |              |       |      |                                      |               |
|                                                                   |                                                                        |                                       |      |       |               |           |              | TWASLASIAIKGEORPSIK                                                                  | 34.9                                         |                                                                   |               |           |              |       |      |                                      |               |
|                                                                   |                                                                        |                                       |      |       |               |           |              | VSPSTAAPVAEAVDAPTQPK                                                                 | 60.3                                         |                                                                   |               |           |              |       |      |                                      |               |

| Accession                                               | Gene          | Protein                                                                               | Start | End | Score | Peptide | Score | Peptide                                                                      | Score                                                          | Peptide |      |     |     |    |      |                                                                                                        |                                                         |      |      |
|---------------------------------------------------------|---------------|---------------------------------------------------------------------------------------|-------|-----|-------|---------|-------|------------------------------------------------------------------------------|----------------------------------------------------------------|---------|------|-----|-----|----|------|--------------------------------------------------------------------------------------------------------|---------------------------------------------------------|------|------|
| 63                                                      | Tb927.6.6060  | 2-amino-3-kebutyrate coenzyme A ligase, putative, glycine acetyltransferase, putative | 1.00  | 504 | 31    | 11      | 10    | 32.4                                                                         | VSPSTAAPVTEAAVDAPTGPKTWASLASIATK                               | 32.8    | 1.00 | 462 | 42  | 10 | 7    | 26.5                                                                                                   | ALGGASGLSSGCKEVDLQR Carbamidomethyl (C13)               | 67.0 | 52.1 |
|                                                         |               |                                                                                       |       |     |       |         |       |                                                                              | DALDSHGVLASVR                                                  | 15.5    |      |     |     |    |      |                                                                                                        | EAAAALAAKEAGTYKVER                                      | 50.2 |      |
|                                                         |               |                                                                                       |       |     |       |         |       |                                                                              | EAAAMQAAHKEAGTYKVER                                            | 51.1    |      |     |     |    |      |                                                                                                        | GRPFLFSNTIAPAAVGGTLK                                    | 39.6 |      |
|                                                         |               |                                                                                       |       |     |       |         |       |                                                                              | FCGCTDTHK Carbamidomethyl (C3)                                 | 33.8    |      |     |     |    |      |                                                                                                        | GRPFLFSNTIAPAAVGGTLK Deamidated (N8)                    | 8.1  |      |
|                                                         |               |                                                                                       |       |     |       |         |       |                                                                              | GRPYLFSNTIAPAAVGGTLK                                           | 39.7    |      |     |     |    |      |                                                                                                        | GTALFGVDIKVDLNTLTK                                      | 50.8 |      |
|                                                         |               |                                                                                       |       |     |       |         |       |                                                                              | GTALFGVDIKVDLNTLTK                                             | 49.1    |      |     |     |    |      |                                                                                                        | GTALFGVDIKVDLNTLTK Deamidated (N16)                     | 37.0 |      |
|                                                         |               |                                                                                       |       |     |       |         |       |                                                                              | KQLGDNTHLFR                                                    | 46.0    |      |     |     |    |      |                                                                                                        | KQLGDNTHLFR                                             | 41.8 |      |
|                                                         |               |                                                                                       |       |     |       |         |       |                                                                              | KQGRPYLFSNTIAPAAVGGTLK Deamidated (N10)                        | 9.6     |      |     |     |    |      |                                                                                                        | KQLGDNTHLFR Deamidated (Q2)                             | 21.6 |      |
|                                                         |               |                                                                                       |       |     |       |         |       |                                                                              | QLQDNTHLFR                                                     | 20.1    |      |     |     |    |      |                                                                                                        | KQGRPYLFSNTIAPAAVGGTLK Deamidated (N10)                 | 16.6 |      |
|                                                         |               |                                                                                       |       |     |       |         |       |                                                                              | QLQDNTHLFR Deamidated (Q3)                                     | 29.9    |      |     |     |    |      |                                                                                                        | VMELGTTSSAR                                             | 60.0 |      |
| VMELGTTSSAR Oxidation (M2)                              | 67.9          |                                                                                       |       |     |       |         |       |                                                                              |                                                                |         |      |     |     |    |      |                                                                                                        |                                                         |      |      |
| 64                                                      | Tb927.6.2790  | L-threonine 3-dehydrogenase, putative                                                 | 1.00  | 614 | 47    | 11      | 10    | 32.2                                                                         | CTDRTIEVEYVEGPAQK Carbamidomethyl (C1)                         | 54.3    | 1.00 | 714 | 106 | 12 | 10   | 37.7                                                                                                   | CTDRTIEVEYVEGPAQK Carbamidomethyl (C1)                  | 42.8 |      |
|                                                         |               |                                                                                       |       |     |       |         |       |                                                                              | IANSWPSLDDSNAR                                                 | 49.6    |      |     |     |    |      |                                                                                                        | IFPSTIAAFGDK                                            | 45.4 |      |
|                                                         |               |                                                                                       |       |     |       |         |       |                                                                              | IFPSTIAAFGDK                                                   | 42.0    |      |     |     |    |      |                                                                                                        | IFPSTIAAFGDKGK Carbamidomethyl (C14)                    | 60.6 |      |
|                                                         |               |                                                                                       |       |     |       |         |       |                                                                              | IFPSTIAAFGDKGK Carbamidomethyl (C14)                           | 59.3    |      |     |     |    |      |                                                                                                        | QIPLHGLPSSL                                             | 38.4 |      |
|                                                         |               |                                                                                       |       |     |       |         |       |                                                                              | IMEAPLEKLR                                                     | 40.7    |      |     |     |    |      |                                                                                                        | QIPLHGLPSSL Deamidated (Q1)                             | 35.1 |      |
|                                                         |               |                                                                                       |       |     |       |         |       |                                                                              | IMEAPLEKLR Oxidation (M2)                                      | 45.5    |      |     |     |    |      |                                                                                                        | SIRLRFSSIAFLPGGKATDVHMYHSALLGK                          | 23.9 |      |
|                                                         |               |                                                                                       |       |     |       |         |       |                                                                              | QIPLHGLPSSL                                                    | 30.9    |      |     |     |    |      |                                                                                                        | TIEVEYVEGPAQK                                           | 43.3 |      |
|                                                         |               |                                                                                       |       |     |       |         |       |                                                                              | TIEVEYVEGPAQK                                                  | 42.4    |      |     |     |    |      |                                                                                                        | TVNVTGFSFSPSELK                                         | 53.8 |      |
|                                                         |               |                                                                                       |       |     |       |         |       |                                                                              | TVNVTGFSFSPSELK                                                | 71.2    |      |     |     |    |      |                                                                                                        | VLTVALGQIGDLSLALR                                       | 42.3 |      |
|                                                         |               |                                                                                       |       |     |       |         |       |                                                                              | VLTVALGQIGDLSLALR                                              | 44.0    |      |     |     |    |      |                                                                                                        | VLTVALGQIGDLSLALR Deamidated (Q8)                       | 42.9 |      |
| VLTVALGQIGDLSLALRDK                                     | 17.7          | VLTVALGQIGDLSLALRDK                                                                   | 42.1  |     |       |         |       |                                                                              |                                                                |         |      |     |     |    |      |                                                                                                        |                                                         |      |      |
| VYTELGGTWYR                                             |               | VYTELGGTWYR                                                                           | 41.2  |     |       |         |       |                                                                              |                                                                |         |      |     |     |    |      |                                                                                                        |                                                         |      |      |
| 65                                                      | Tb927.4.1300  | hypothetical protein, conserved                                                       | 1.00  | 512 | 38    | 14      | 12    | 48.9                                                                         | EVAIAHGNGER Deamidated (N8)                                    | 5.6     | 1.00 | 329 | 42  | 9  | 8    | 30.5                                                                                                   | EVAIAHGNGER Deamidated (N8)                             | 3.9  |      |
|                                                         |               |                                                                                       |       |     |       |         |       |                                                                              | FVFTAVLPHR                                                     | 45.2    |      |     |     |    |      |                                                                                                        | FVFTAVLPHR                                              | 56.7 |      |
|                                                         |               |                                                                                       |       |     |       |         |       |                                                                              | LLLYPMTFISR Oxidation (M7)                                     | 26.2    |      |     |     |    |      |                                                                                                        | LLLYPMTFISR                                             | 22.7 |      |
|                                                         |               |                                                                                       |       |     |       |         |       |                                                                              | QMLDQWYGLQNLFPYADLER                                           | 19.0    |      |     |     |    |      |                                                                                                        | REIEPKQDLK                                              | 32.8 |      |
|                                                         |               |                                                                                       |       |     |       |         |       |                                                                              | QMLDQWYGLQNLFPYADLER Deamidated (Q1)- Oxidation (M2)           | 60.4    |      |     |     |    |      |                                                                                                        | SVGSLVSPVPHGEVLPLPGLGVIEAAK                             | 33.4 |      |
|                                                         |               |                                                                                       |       |     |       |         |       |                                                                              | REIEPKQDLK                                                     | 42.2    |      |     |     |    |      |                                                                                                        | SVGSLVSPVPHGEVLPLPGLGVIEAAK Carbamidomethyl (C37)       | 35.1 |      |
|                                                         |               |                                                                                       |       |     |       |         |       |                                                                              | SKENGRVGEIVPHTYSLVGVGCK Carbamidomethyl (C22)                  | 33.8    |      |     |     |    |      |                                                                                                        | VNLDSESELRAFQGNAR Carbamidomethyl (C13)                 | 8.5  |      |
|                                                         |               |                                                                                       |       |     |       |         |       |                                                                              | SKENGRVGEIVPHTYSLVGVGCK Deamidated (N4)- Carbamidomethyl (C22) | 27.5    |      |     |     |    |      |                                                                                                        | VLCISHOALNALRPFKR Carbamidomethyl (C3)                  | 31.2 |      |
|                                                         |               |                                                                                       |       |     |       |         |       |                                                                              | SSEQVLSICAPENLIPNEKRFVFTAVLPHR Carbamidomethyl (C10)           | 24.1    |      |     |     |    |      |                                                                                                        | VLCISHOALNALRPFKR Carbamidomethyl (C3)- Deamidated (Q7) | 11.4 |      |
|                                                         |               |                                                                                       |       |     |       |         |       |                                                                              | SVGSLVSPVPHGEVLPLPGLGVIEAAK                                    | 34.8    |      |     |     |    |      |                                                                                                        |                                                         |      |      |
| SVGSLVSPVPHGEVLPLPGLGVIEAAKVDKGGC Carbamidomethyl (C37) | 22.4          |                                                                                       |       |     |       |         |       |                                                                              |                                                                |         |      |     |     |    |      |                                                                                                        |                                                         |      |      |
| VNLDSESELRAFQGNAR Carbamidomethyl (C13)                 | 29.2          |                                                                                       |       |     |       |         |       |                                                                              |                                                                |         |      |     |     |    |      |                                                                                                        |                                                         |      |      |
| VLCISHOALNALRPFKR Carbamidomethyl (C3)                  | 36.2          |                                                                                       |       |     |       |         |       |                                                                              |                                                                |         |      |     |     |    |      |                                                                                                        |                                                         |      |      |
| VLCISHOALNALRPFKR Carbamidomethyl (C3)- Deamidated (Q7) | 19.4          |                                                                                       |       |     |       |         |       |                                                                              |                                                                |         |      |     |     |    |      |                                                                                                        |                                                         |      |      |
| 66                                                      | Tb927.10.4310 | prohibitin 2, putative                                                                | 1.00  | 493 | 24    | 11      | 9     | 38.0                                                                         | AVIAQFNASDLLKRPVSNR                                            | 53.2    | 1.00 | 495 | 20  | 10 | 6    | 25.8                                                                                                   | AVIAQFNASDLLK                                           | 39.7 |      |
|                                                         |               |                                                                                       |       |     |       |         |       |                                                                              | AVIAQFNASDLLKRPVSNR Deamidated (N7)                            | 32.8    |      |     |     |    |      |                                                                                                        | AVIAQFNASDLLKRPVSNR                                     | 31.1 |      |
|                                                         |               |                                                                                       |       |     |       |         |       |                                                                              | DLQDTNLAKR                                                     | 24.1    |      |     |     |    |      |                                                                                                        | AVIAQFNASDLLKRPVSNR Deamidated (G6)                     | 54.3 |      |
|                                                         |               |                                                                                       |       |     |       |         |       |                                                                              | GEAEAKLGMVQKNPAFITLR Oxidation (M11)                           | 33.7    |      |     |     |    |      |                                                                                                        | LIGMAVQKNPAFITLR                                        | 69.3 |      |
|                                                         |               |                                                                                       |       |     |       |         |       |                                                                              | KVMAEAOxidation (M4)                                           | 39.1    |      |     |     |    |      |                                                                                                        | LIGMAVQKNPAFITLR Oxidation (M4)                         | 29.0 |      |
|                                                         |               |                                                                                       |       |     |       |         |       |                                                                              | LIGMAVQKNPAFITLR                                               | 42.2    |      |     |     |    |      |                                                                                                        | LIGMAVQKNPAFITLR Oxidation (M4)- Deamidated (N9)        | 37.4 |      |
|                                                         |               |                                                                                       |       |     |       |         |       |                                                                              | LIGMAVQKNPAFITLR Oxidation (M4)                                | 57.9    |      |     |     |    |      |                                                                                                        | NRYEGGANPAFLETVPVDIR                                    | 29.5 |      |
|                                                         |               |                                                                                       |       |     |       |         |       |                                                                              | NKPTEVALTAGSR                                                  | 52.0    |      |     |     |    |      |                                                                                                        | TYGEGANFAIFLETVPVDIR                                    | 26.4 |      |
|                                                         |               |                                                                                       |       |     |       |         |       |                                                                              | NKPFITLR                                                       | 28.1    |      |     |     |    |      |                                                                                                        | VLYQPHVLSALPDYR                                         | 48.5 |      |
|                                                         |               |                                                                                       |       |     |       |         |       |                                                                              | TYGEGANFAIFLETVPVDIR                                           | 28.8    |      |     |     |    |      |                                                                                                        | VLYQPHVLSALPDYR Deamidated (Q4)                         | 38.4 |      |
| VLYQPHVLSALPDYR                                         | 34.1          |                                                                                       |       |     |       |         |       |                                                                              |                                                                |         |      |     |     |    |      |                                                                                                        |                                                         |      |      |
| 67                                                      | Tb927.9.14160 | rieske iron-sulfur protein, mitochondrial precursor                                   | 1.00  | 464 | 47    | 12      | 9     | 27.6                                                                         | DRPVNSWSEDFLKPVPVK                                             | 11.1    | 1.00 | 665 | 45  | 17 | 10   | 33.0                                                                                                   | DRPVNSWSEDFLKPVPVK                                      | 23.7 |      |
|                                                         |               |                                                                                       |       |     |       |         |       |                                                                              | GKPFVYR                                                        | 29.1    |      |     |     |    |      |                                                                                                        | IRQGPAPLNLEVPVYR                                        | 30.9 |      |
|                                                         |               |                                                                                       |       |     |       |         |       |                                                                              | GKPFVYR                                                        | 25.0    |      |     |     |    |      |                                                                                                        | IRQGPAPLNLEVPVYR Deamidated (N9)                        | 19.0 |      |
|                                                         |               |                                                                                       |       |     |       |         |       |                                                                              | IRQGPAPLNLEVPVYR                                               | 31.5    |      |     |     |    |      |                                                                                                        | LPNELEDRAR                                              | 27.7 |      |
|                                                         |               |                                                                                       |       |     |       |         |       |                                                                              | IRQGPAPLNLEVPVYR Deamidated (N9)                               | 40.0    |      |     |     |    |      |                                                                                                        | OGPAPLNLEVPVYR                                          | 18.4 |      |
|                                                         |               |                                                                                       |       |     |       |         |       |                                                                              | LPNELEDRAR                                                     | 29.0    |      |     |     |    |      |                                                                                                        | OGPAPLNLEVPVYR Deamidated (N7)                          | 18.2 |      |
|                                                         |               |                                                                                       |       |     |       |         |       |                                                                              | OGPAPLNLEVPVYR                                                 | 27.5    |      |     |     |    |      |                                                                                                        | OGPAPLNLEVPVYR Deamidated (Q1)                          | 18.2 |      |
|                                                         |               |                                                                                       |       |     |       |         |       |                                                                              | OGPAPLNLEVPVYR Deamidated (N7)                                 | 18.3    |      |     |     |    |      |                                                                                                        | QLEGSNPLTVK                                             | 39.8 |      |
|                                                         |               |                                                                                       |       |     |       |         |       |                                                                              | OGPAPLNLEVPVYR Deamidated (Q1)                                 | 21.9    |      |     |     |    |      |                                                                                                        | QLEGSNPLTVKDRPVNSWSEDFLKPVPVK                           | 21.3 |      |
|                                                         |               |                                                                                       |       |     |       |         |       |                                                                              | VSLVFKQLEGSNPLTVK                                              | 62.6    |      |     |     |    |      |                                                                                                        | QLEGSNPLTVKDRPVNSWSEDFLKPVPVK Deamidated (Q1)           | 20.4 |      |
| VSLVFKQLEGSNPLTVKDRPVNSWSEDFLKPVPVK                     | 25.1          | VSLVFKQLEGSNPLTVK                                                                     | 58.2  |     |       |         |       |                                                                              |                                                                |         |      |     |     |    |      |                                                                                                        |                                                         |      |      |
| VSDDKTYLQKL                                             | 51.3          | VSLVFKQLEGSNPLTVK Deamidated (N12)                                                    | 65.2  |     |       |         |       |                                                                              |                                                                |         |      |     |     |    |      |                                                                                                        |                                                         |      |      |
|                                                         |               | VSLVFKQLEGSNPLTVKDRPVNSWSEDFLKPVPVK                                                   | 67.1  |     |       |         |       |                                                                              |                                                                |         |      |     |     |    |      |                                                                                                        |                                                         |      |      |
|                                                         |               | VSLVFKQLEGSNPLTVKDRPVNSWSEDFLKPVPVK Deamidated (Q7)                                   | 35.5  |     |       |         |       |                                                                              |                                                                |         |      |     |     |    |      |                                                                                                        |                                                         |      |      |
|                                                         |               | WDDDKTYLQKL                                                                           | 33.9  |     |       |         |       |                                                                              |                                                                |         |      |     |     |    |      |                                                                                                        |                                                         |      |      |
|                                                         |               | YSDPFLGSDVTSSEVLTNYPEGSR Carbamidomethyl (C7)                                         | 31.4  |     |       |         |       |                                                                              |                                                                |         |      |     |     |    |      |                                                                                                        |                                                         |      |      |
|                                                         |               | YSDPFLGSDVTSSEVLTNYPEGSR Carbamidomethyl (C7)- Deamidated (N18)                       | 18.3  |     |       |         |       |                                                                              |                                                                |         |      |     |     |    |      |                                                                                                        |                                                         |      |      |
| 68                                                      | Tb927.1.120   | retrotransposon hot spot protein 4 (RH54), putative                                   | 1.00  | 406 | 23    | 13      | 12    | 15.1                                                                         | AQGTAAVAIEK                                                    | 20.4    | 1.00 | 332 | 16  | 8  | 8    | 10.1                                                                                                   | AQGTAAVAIEK                                             | 35.4 |      |
|                                                         |               |                                                                                       |       |     |       |         |       |                                                                              | AQGTAAVAIEKGYDYSYNAK                                           | 18.3    |      |     |     |    |      |                                                                                                        | AQGTAAVAIEKGYDYSYNAK                                    | 60.0 |      |
|                                                         |               |                                                                                       |       |     |       |         |       |                                                                              | AREVEVEGR                                                      | 12.6    |      |     |     |    |      |                                                                                                        | FVFSAPVEYHER                                            | 35.6 |      |
|                                                         |               |                                                                                       |       |     |       |         |       |                                                                              | FVFSAPVEYHER                                                   | 40.5    |      |     |     |    |      |                                                                                                        | HVIVGTRGK                                               | 25.0 |      |
|                                                         |               |                                                                                       |       |     |       |         |       |                                                                              | HVIVGTRGK                                                      | 14.2    |      |     |     |    |      |                                                                                                        | SLNDMASQGLR Oxidation (M6)                              | 18.2 |      |
|                                                         |               |                                                                                       |       |     |       |         |       |                                                                              | IDMVGPLR Oxidation (M3)                                        | 54.0    |      |     |     |    |      |                                                                                                        | VFDGKQGR                                                | 32.9 |      |
|                                                         |               |                                                                                       |       |     |       |         |       |                                                                              | KLVLSEEAR Carbamidomethyl (C3)                                 | 38.7    |      |     |     |    |      |                                                                                                        | VSSGTNVDSYR                                             | 50.4 |      |
|                                                         |               |                                                                                       |       |     |       |         |       |                                                                              | NAPKLMGLAGR Oxidation (M6)                                     | 32.6    |      |     |     |    |      |                                                                                                        | WVEKAEITPR                                              | 46.9 |      |
|                                                         |               |                                                                                       |       |     |       |         |       |                                                                              | SAGDKQEVVTHLKV                                                 | 12.9    |      |     |     |    |      |                                                                                                        |                                                         |      |      |
|                                                         |               |                                                                                       |       |     |       |         |       |                                                                              | SLNDMASQGLR                                                    | 52.0    |      |     |     |    |      |                                                                                                        |                                                         |      |      |
| SLNDMASQGLR Oxidation (M6)                              | 42.6          |                                                                                       |       |     |       |         |       |                                                                              |                                                                |         |      |     |     |    |      |                                                                                                        |                                                         |      |      |
| VFDGKQGR                                                | 21.1          |                                                                                       |       |     |       |         |       |                                                                              |                                                                |         |      |     |     |    |      |                                                                                                        |                                                         |      |      |
| WVEKAEITPR                                              | 22.8          |                                                                                       |       |     |       |         |       |                                                                              |                                                                |         |      |     |     |    |      |                                                                                                        |                                                         |      |      |
| 69                                                      | Tb927.10.2350 | pyruvate dehydrogenase complex E3 binding protein, putative                           | 1.00  | 663 | 45    | 11      | 41.5  | AALAEITPTGR                                                                  | 40.0                                                           | 1.00    | 429  | 23  | 10  | 8  | 33.5 | ADRVGQGFQYEEK                                                                                          | 23.7                                                    |      |      |
|                                                         |               |                                                                                       |       |     |       |         |       | ADRVGQGFQYEEK                                                                | 38.5                                                           |         |      |     |     |    |      | ADRVGQGFQYEEKAAAPK                                                                                     | 34.8                                                    |      |      |
|                                                         |               |                                                                                       |       |     |       |         |       | ADRVGQGFQYEEKAAAPK                                                           | 46.0                                                           |         |      |     |     |    |      | ECCAENTNGAVSSAVK Carbamidomethyl (C2)- Carbamidomethyl (C3)                                            | 65.6                                                    |      |      |
|                                                         |               |                                                                                       |       |     |       |         |       | ECCAENTNGAVSSAVK Carbamidomethyl (C2)- Carbamidomethyl (C3)                  | 12.0                                                           |         |      |     |     |    |      | ECCAENTNGAVSSAVK Carbamidomethyl (C2)- Carbamidomethyl (C3)- Deamidated (N8)                           | 47.6                                                    |      |      |
|                                                         |               |                                                                                       |       |     |       |         |       | ECCAENTNGAVSSAVK Carbamidomethyl (C2)- Carbamidomethyl (C3)- Deamidated (N8) | 35.5                                                           |         |      |     |     |    |      | FTKADRVGQGFQYEEKAAAPK Deamidated (Q9)                                                                  | 5.6                                                     |      |      |
|                                                         |               |                                                                                       |       |     |       |         |       | FTKADRVGQGFQYEEKAAAPK                                                        | 50.0                                                           |         |      |     |     |    |      | GSSSFTNASECCAGTAVSSAVK Deamidated (N8)- Deamidated (N19)- Carbamidomethyl (C13)- Carbamidomethyl (C14) | 40.1                                                    |      |      |
|                                                         |               |                                                                                       |       |     |       |         |       | GSSSFTNASE                                                                   | 23.7                                                           |         |      |     |     |    |      | IARLDKAALEAITPTGR                                                                                      | 29.7                                                    |      |      |
|                                                         |               |                                                                                       |       |     |       |         |       | IARLDKAALEAITPTGR                                                            | 43.3                                                           |         |      |     |     |    |      | LDKAALEAITPTGR                                                                                         | 52.2                                                    |      |      |
|                                                         |               |                                                                                       |       |     |       |         |       | LDKAALEAITPTGR                                                               | 51.3                                                           |         |      |     |     |    |      | VSDTLLQQLNSMPTPK                                                                                       | 35.7                                                    |      |      |
|                                                         |               |                                                                                       |       |     |       |         |       | LDKAALEAITPTGRGGR                                                            | 32.3                                                           |         |      |     |     |    |      | VSDTLLQQLNSMPTPK Oxidation (M14)                                                                       | 18.2                                                    |      |      |
| VSDTLLQQLNSMPTPK                                        | 42.5          |                                                                                       |       |     |       |         |       |                                                                              |                                                                |         |      |     |     |    |      |                                                                                                        |                                                         |      |      |
| VSDTLLQQLNSMPTPK Deamidated (N12)- Oxidation (M14)      | 38.9          |                                                                                       |       |     |       |         |       |                                                                              |                                                                |         |      |     |     |    |      |                                                                                                        |                                                         |      |      |
| VSDTLLQQLNSMPTPK Oxidation (M14)                        | 19.0          |                                                                                       |       |     |       |         |       |                                                                              |                                                                |         |      |     |     |    |      |                                                                                                        |                                                         |      |      |
| YGGSLDEAVASGQPMR Oxidation (M17)                        | 50.0          |                                                                                       |       |     |       |         |       |                                                                              |                                                                |         |      |     |     |    |      |                                                                                                        |                                                         |      |      |
| 70                                                      | Tb927.10.180  | ATP synthase F1 subunit gamma protein, putative                                       | 1.00  | 260 | 24    | 8       | 8     | 31.8                                                                         | CIDSVYSSK Carbamidomethyl (C1)                                 | 36.5    | 1.00 | 155 | 6   | 3  | 2    | 19.3                                                                                                   | LVAIEGQLNLISSQOR                                        | 45.5 |      |
|                                                         |               |                                                                                       |       |     |       |         |       |                                                                              | LVAIEGQLNLISSQOR                                               | 24.5    |      |     |     |    |      |                                                                                                        | LVAIEGQLNLISSQOR Deamidated (Q7)                        | 46.5 |      |
|                                                         |               |                                                                                       |       |     |       |         |       |                                                                              | NALVYPIITNR                                                    | 43.6    |      |     |     |    |      |                                                                                                        | YLFANALQNEEQLRDFDFHAALAVLNVAENELSEGAAR Deamidated (N5)  | 45.2 |      |
|                                                         |               |                                                                                       |       |     |       |         |       |                                                                              | NALVYPIITNRSSCGALNSNVR Carbamidomethyl (C15)                   | 16.5    |      |     |     |    |      |                                                                                                        |                                                         |      |      |
|                                                         |               |                                                                                       |       |     |       |         |       |                                                                              | RNKFWEAVTK                                                     | 40.7    |      |     |     |    |      |                                                                                                        |                                                         |      |      |
|                                                         |               |                                                                                       |       |     |       |         |       |                                                                              | QGITAALEILSAMSSLEGNAKMGVRR Oxidation (M23)                     | 9.4     |      |     |     |    |      |                                                                                                        |                                                         |      |      |
|                                                         |               |                                                                                       |       |     |       |         |       |                                                                              | RNKFWEAVTK                                                     | 21.4    |      |     |     |    |      |                                                                                                        |                                                         |      |      |
|                                                         |               |                                                                                       |       |     |       |         |       |                                                                              | TSSLNKTNR                                                      | 36.2    |      |     |     |    |      |                                                                                                        |                                                         |      |      |
|                                                         |               |                                                                                       |       |     |       |         |       |                                                                              |                                                                |         |      |     |     |    |      |                                                                                                        |                                                         |      |      |
|                                                         |               |                                                                                       |       |     |       |         |       |                                                                              |                                                                |         |      |     |     |    |      |                                                                                                        |                                                         |      |      |
| 71                                                      | Tb927.3.3900  | carnitine O-palmitoyltransferase II, putative                                         | 1.00  | 508 | 21    | 11      | 8     | 17.9                                                                         | IPVKDLAVNLKLR                                                  | 46.1    | 1.00 | 505 | 25  | 11 | 10   | 24.5                                                                                                   | IPVKDLAVNLKLR                                           | 43.5 |      |
|                                                         |               |                                                                                       |       |     |       |         |       |                                                                              | IPVKDLAVNLKLR Deamidated (N9)                                  | 35.1    |      |     |     |    |      |                                                                                                        | IPVKDLAVNLKLR Deamidated (N9)                           | 34.2 |      |



Peptides

| Accession                                                                      | Protein Name   | Start                                                       | End  | Score | Modifications | Peptide Sequence | Score | Modifications | Peptide Sequence                                                         | Score         | Modifications                                                                                              |      |     |    |   |   |      |                                                       |      |                                                       |      |
|--------------------------------------------------------------------------------|----------------|-------------------------------------------------------------|------|-------|---------------|------------------|-------|---------------|--------------------------------------------------------------------------|---------------|------------------------------------------------------------------------------------------------------------|------|-----|----|---|---|------|-------------------------------------------------------|------|-------------------------------------------------------|------|
| 81                                                                             | Tb927.3.3130   | hypothetical protein, conserved                             | 1.00 | 438   | 27            | 13               | 10    | 9.0           | AEGNKQFYQCSSSDPEPAEGFNVVGR Carbamidomethyl (C11)                         | 14.0          | AATAVANGLREGYSVALLSVHNFPEENTLLK Deamidated (N7)                                                            | 39.0 |     |    |   |   |      |                                                       |      |                                                       |      |
|                                                                                |                |                                                             |      |       |               |                  |       |               | CDDGSELWFLSLK Carbamidomethyl (C1)                                       | 13.5          | AEGNKQFYQCSSSDPEPAEGFNVVGR Carbamidomethyl (C11)                                                           | 60.3 |     |    |   |   |      |                                                       |      |                                                       |      |
|                                                                                |                |                                                             |      |       |               |                  |       |               | CTFEASETPYVVR Carbamidomethyl (C1)                                       | 36.7          | AEGNKQFYQCSSSDPEPAEGFNVVGR Deamidated (N6) Carbamidomethyl (C11)                                           | 61.9 |     |    |   |   |      |                                                       |      |                                                       |      |
|                                                                                |                |                                                             |      |       |               |                  |       |               | ITGYVEAHNPVLSVPTGR                                                       | 37.0          | ITGYVEAHNPVLSVPTGR                                                                                         | 52.2 |     |    |   |   |      |                                                       |      |                                                       |      |
|                                                                                |                |                                                             |      |       |               |                  |       |               | KAATAWANGLREGYSVALLSVHNFPEENTLLK                                         | 20.8          | KAATAWANGLREGYSVALLSVHNFPEENTLLK Deamidated (N8)                                                           | 34.8 |     |    |   |   |      |                                                       |      |                                                       |      |
|                                                                                |                |                                                             |      |       |               |                  |       |               | KAATAWANGLREGYSVALLSVHNFPEENTLLK Deamidated (N8)                         | 23.7          | NLVDDFLPTVGVPCYAR Carbamidomethyl (C16)                                                                    | 40.8 |     |    |   |   |      |                                                       |      |                                                       |      |
|                                                                                |                |                                                             |      |       |               |                  |       |               | LDGDRFQFVEVR                                                             | 24.3          |                                                                                                            |      |     |    |   |   |      |                                                       |      |                                                       |      |
|                                                                                |                |                                                             |      |       |               |                  |       |               | NLVDDFLPTVGVPCYAR Carbamidomethyl (C16)                                  | 42.0          |                                                                                                            |      |     |    |   |   |      |                                                       |      |                                                       |      |
|                                                                                |                |                                                             |      |       |               |                  |       |               | VLNKDGWKK                                                                | 28.7          |                                                                                                            |      |     |    |   |   |      |                                                       |      |                                                       |      |
|                                                                                |                |                                                             |      |       |               |                  |       |               | ANAAVSTNDVEDVRALPATLTK Deamidated (N2)                                   | 47.7          | EAGEEGDRLPINLLGKLENSVDAAGSPASGGPR                                                                          | 27.4 |     |    |   |   |      |                                                       |      |                                                       |      |
| ANAAVSTNDVEDVRALPATLTKGTPPAR                                                   | 20.2           | EAGEEGDRLPINLLGKLENSVDAAGSPASGGPR Deamidated (N12)          | 40.7 |       |               |                  |       |               |                                                                          |               |                                                                                                            |      |     |    |   |   |      |                                                       |      |                                                       |      |
| ANAAVSTNDVEDVRALPATLTKGTPPAR Deamidated (N2)                                   | 10.1           | EAGEEGDRLPINLLGKLENSVDAAGSPASGGPR Deamidated (N22)          | 43.3 |       |               |                  |       |               |                                                                          |               |                                                                                                            |      |     |    |   |   |      |                                                       |      |                                                       |      |
| ANAAVSTNDVEDVRALPATLTKGTPPAR Deamidated (N8)                                   | 11.2           | KAELTLPR                                                    | 39.8 |       |               |                  |       |               |                                                                          |               |                                                                                                            |      |     |    |   |   |      |                                                       |      |                                                       |      |
| EAGEEGDRLPINLLGKLENSVDAAGSPASGGPR                                              | 11.3           | RLAALCOEKEQLPAALGAK Carbamidomethyl (C8)                    | 31.9 |       |               |                  |       |               |                                                                          |               |                                                                                                            |      |     |    |   |   |      |                                                       |      |                                                       |      |
| EAGEEGDRLPINLLGKLENSVDAAGSPASGGPR Deamidated (N12)                             | 24.8           | RLAALCOEKEQLPAALGAK Carbamidomethyl (C8) - Deamidated (O11) | 19.6 |       |               |                  |       |               |                                                                          |               |                                                                                                            |      |     |    |   |   |      |                                                       |      |                                                       |      |
| HGGYQDADVAR                                                                    | 47.2           |                                                             |      |       |               |                  |       |               |                                                                          |               |                                                                                                            |      |     |    |   |   |      |                                                       |      |                                                       |      |
| KAELTLPR                                                                       | 39.1           |                                                             |      |       |               |                  |       |               |                                                                          |               |                                                                                                            |      |     |    |   |   |      |                                                       |      |                                                       |      |
| LAALCOEKEQLPAALGAK Carbamidomethyl (C5)                                        | 38.0           |                                                             |      |       |               |                  |       |               |                                                                          |               |                                                                                                            |      |     |    |   |   |      |                                                       |      |                                                       |      |
| NARPEWGTQVR                                                                    | 25.6           |                                                             |      |       |               |                  |       |               |                                                                          |               |                                                                                                            |      |     |    |   |   |      |                                                       |      |                                                       |      |
| RLAALCOEKEQLPAALGAK Carbamidomethyl (C6)                                       | 38.0           |                                                             |      |       |               |                  |       |               |                                                                          |               |                                                                                                            |      |     |    |   |   |      |                                                       |      |                                                       |      |
| RLPAEYGEPLLNKCEAVIQR Carbamidomethyl (C14)                                     | 49.4           |                                                             |      |       |               |                  |       |               |                                                                          |               |                                                                                                            |      |     |    |   |   |      |                                                       |      |                                                       |      |
| SVADIADRLR                                                                     | 26.9           |                                                             |      |       |               |                  |       |               |                                                                          |               |                                                                                                            |      |     |    |   |   |      |                                                       |      |                                                       |      |
| 82                                                                             | Tb927.9.6100   | TFIIIF-stimulated CTD phosphatase, putative                 | 1.00 | 354   | 26            | 9                | 8     | 19.8          | ILGNVLER                                                                 | 51.9          | IVDEVKYGQVGR                                                                                               | 51.8 |     |    |   |   |      |                                                       |      |                                                       |      |
|                                                                                |                |                                                             |      |       |               |                  |       |               | IVDEVKYGQVGR                                                             | 62.6          | LQADHALMDLIPMR                                                                                             | 24.1 |     |    |   |   |      |                                                       |      |                                                       |      |
|                                                                                |                |                                                             |      |       |               |                  |       |               | IVDEVKYGQVGRYEGDMAK Oxidation (M20)                                      | 15.1          | NGVKEFLPNER Deamidated (N1)                                                                                | 33.7 |     |    |   |   |      |                                                       |      |                                                       |      |
|                                                                                |                |                                                             |      |       |               |                  |       |               | LQADHALMDLIPMR Oxidation (M8) Oxidation (M13)                            | 33.3          | SAASSTDLHELDHWR                                                                                            | 12.9 |     |    |   |   |      |                                                       |      |                                                       |      |
|                                                                                |                |                                                             |      |       |               |                  |       |               | NGVKEFLPNER                                                              | 35.8          |                                                                                                            |      |     |    |   |   |      |                                                       |      |                                                       |      |
|                                                                                |                |                                                             |      |       |               |                  |       |               | OKLGNLTK                                                                 | 18.6          |                                                                                                            |      |     |    |   |   |      |                                                       |      |                                                       |      |
|                                                                                |                |                                                             |      |       |               |                  |       |               | OKLGNLTKER                                                               | 26.1          |                                                                                                            |      |     |    |   |   |      |                                                       |      |                                                       |      |
|                                                                                |                |                                                             |      |       |               |                  |       |               | SFPLHPRNGVKIEFLPNER                                                      | 29.5          |                                                                                                            |      |     |    |   |   |      |                                                       |      |                                                       |      |
|                                                                                |                |                                                             |      |       |               |                  |       |               | SFPLHPRNGVKIEFLPNER Deamidated (N8)                                      | 35.2          |                                                                                                            |      |     |    |   |   |      |                                                       |      |                                                       |      |
|                                                                                |                |                                                             |      |       |               |                  |       |               | AHGAPLGDDEVAR                                                            | 33.2          |                                                                                                            |      |     |    |   |   |      |                                                       |      |                                                       |      |
| 83                                                                             | Tb927.8.6170   | transketolase, putative                                     | 1.00 | 387   | 29            | 11               | 10    | 25.0          | ATPNLLVFRSDQDTESAAWALALENTRGPSILCLSR Carbamidomethyl (C34)               | 26.0          | ATPNLLVFRSDQDTESAAWALALENTR                                                                                | 18.0 |     |    |   |   |      |                                                       |      |                                                       |      |
|                                                                                |                |                                                             |      |       |               |                  |       |               | CLAADVQQAQ Carbamidomethyl (C1)                                          | 44.4          | ATPNLLVFRSDQDTESAAWALALENTRGPSILCLSR Carbamidomethyl (C34)                                                 | 24.5 |     |    |   |   |      |                                                       |      |                                                       |      |
|                                                                                |                |                                                             |      |       |               |                  |       |               | FHWQPEVYFSK                                                              | 20.8          | FHWQPEVYFSK                                                                                                | 26.6 |     |    |   |   |      |                                                       |      |                                                       |      |
|                                                                                |                |                                                             |      |       |               |                  |       |               | KYTEEFQEAALQNLDFKLPDQWK                                                  | 29.1          | KASENALGALLTLPALVGGSDLSPLNTRGPSAQMDVDFQK                                                                   | 20.2 |     |    |   |   |      |                                                       |      |                                                       |      |
|                                                                                |                |                                                             |      |       |               |                  |       |               | KYVGGTAPAKR                                                              | 38.2          | KYEAALGHVIVPNSGSDFTALR                                                                                     | 28.0 |     |    |   |   |      |                                                       |      |                                                       |      |
|                                                                                |                |                                                             |      |       |               |                  |       |               | LASSEKHAFLPDGDEVAR                                                       | 34.1          | KYTEEFQEAALQNLDFKLPDQWK                                                                                    | 28.6 |     |    |   |   |      |                                                       |      |                                                       |      |
|                                                                                |                |                                                             |      |       |               |                  |       |               | ONTYFQTSLEQIAK                                                           | 16.1          | KYVGGTAPAKR                                                                                                | 19.4 |     |    |   |   |      |                                                       |      |                                                       |      |
|                                                                                |                |                                                             |      |       |               |                  |       |               | SKLPLNDKSIATR                                                            | 17.6          | LASSEKHAFLPDGDEVAR                                                                                         | 18.5 |     |    |   |   |      |                                                       |      |                                                       |      |
|                                                                                |                |                                                             |      |       |               |                  |       |               | SKLPLNDKSIATR Deamidated (N6)                                            | 27.6          | SKLPLNDKSIATR                                                                                              | 26.7 |     |    |   |   |      |                                                       |      |                                                       |      |
|                                                                                |                |                                                             |      |       |               |                  |       |               | VPEEGVVISIEPFVSTGWER                                                     | 18.9          | SKLPLNDKSIATR Deamidated (N6)                                                                              | 21.5 |     |    |   |   |      |                                                       |      |                                                       |      |
|                                                                                |                | VPEEGVVISIEPFVSTGWER                                        | 38.5 |       |               |                  |       |               |                                                                          |               |                                                                                                            |      |     |    |   |   |      |                                                       |      |                                                       |      |
|                                                                                |                | VKEGFLDPTK                                                  | 23.5 |       |               |                  |       |               |                                                                          |               |                                                                                                            |      |     |    |   |   |      |                                                       |      |                                                       |      |
|                                                                                |                | YTEEFQEAALQNLDFKLPDQWK                                      | 28.8 |       |               |                  |       |               |                                                                          |               |                                                                                                            |      |     |    |   |   |      |                                                       |      |                                                       |      |
| 84                                                                             | Tb927.3.930    | dynein heavy chain, putative                                | 1.00 | 305   | 27            | 10               | 9     | 2.7           | IYEPAPSMELQDR Oxidation (M8)                                             | 36.6          | EALDESSLANMLSSRYCAFMR Deamidated (N11) Oxidation (M13) Carbamidomethyl (C19)                               | 32.9 |     |    |   |   |      |                                                       |      |                                                       |      |
|                                                                                |                |                                                             |      |       |               |                  |       |               | LANPALIKR                                                                | 13.9          | LANPALIKR                                                                                                  | 19.7 |     |    |   |   |      |                                                       |      |                                                       |      |
|                                                                                |                |                                                             |      |       |               |                  |       |               | LALFLPTEGGGSESLTER                                                       | 31.3          | LRLVLEQLAEAPR                                                                                              | 5.5  |     |    |   |   |      |                                                       |      |                                                       |      |
|                                                                                |                |                                                             |      |       |               |                  |       |               | LRLVLEQLAEAPR                                                            | 13.8          | NMTPVAGASVWAR Oxidation (M2)                                                                               | 7.0  |     |    |   |   |      |                                                       |      |                                                       |      |
|                                                                                |                |                                                             |      |       |               |                  |       |               | NMTPVAGASVWAR                                                            | 9.2           | STSKPVEVTDVTLR                                                                                             | 64.2 |     |    |   |   |      |                                                       |      |                                                       |      |
|                                                                                |                |                                                             |      |       |               |                  |       |               | NMTPVAGASVWAR Oxidation (M2)                                             | 26.9          | VVDEVDASSVR                                                                                                | 6.6  |     |    |   |   |      |                                                       |      |                                                       |      |
|                                                                                |                |                                                             |      |       |               |                  |       |               | QLGEKSLGSK                                                               | 35.9          |                                                                                                            |      |     |    |   |   |      |                                                       |      |                                                       |      |
|                                                                                |                |                                                             |      |       |               |                  |       |               | SFKQLDLTR                                                                | 7.5           |                                                                                                            |      |     |    |   |   |      |                                                       |      |                                                       |      |
|                                                                                |                |                                                             |      |       |               |                  |       |               | STSKPVEVTDVTLR                                                           | 31.5          |                                                                                                            |      |     |    |   |   |      |                                                       |      |                                                       |      |
|                                                                                |                |                                                             |      |       |               |                  |       |               |                                                                          | 21.5          |                                                                                                            |      |     |    |   |   |      |                                                       |      |                                                       |      |
| 85                                                                             | Tb927.10.14750 | fibrillarin, putative                                       | 1.00 | 468   | 32            | 12               | 11    | 46.4          | ANCIDSTADSTFAVEVQK Carbamidomethyl (C3)                                  | 70.6          | ILALNAQHFLK Deamidated (N5)                                                                                | 36.9 |     |    |   |   |      |                                                       |      |                                                       |      |
|                                                                                |                |                                                             |      |       |               |                  |       |               | EQASLEPFERDHAHVTVYKSPQ                                                   | 36.5          | SLVPGVSYGEKR                                                                                               | 50.0 |     |    |   |   |      |                                                       |      |                                                       |      |
|                                                                                |                |                                                             |      |       |               |                  |       |               | QNFSPNAR                                                                 | 18.6          | SNVPLEDARYPKYR                                                                                             | 19.9 |     |    |   |   |      |                                                       |      |                                                       |      |
|                                                                                |                |                                                             |      |       |               |                  |       |               | ILALNAQHFLK                                                              | 45.0          |                                                                                                            |      |     |    |   |   |      |                                                       |      |                                                       |      |
|                                                                                |                |                                                             |      |       |               |                  |       |               | ILALNAQHFLKNGGFVISIK Deamidated (O12)                                    | 26.0          |                                                                                                            |      |     |    |   |   |      |                                                       |      |                                                       |      |
|                                                                                |                |                                                             |      |       |               |                  |       |               | LVDCIFMDVAGPDQAR Carbamidomethyl (C4) Oxidation (M7)                     | 41.2          |                                                                                                            |      |     |    |   |   |      |                                                       |      |                                                       |      |
|                                                                                |                |                                                             |      |       |               |                  |       |               | LVDCIFMDVAGPDQAR Carbamidomethyl (C4) Oxidation (M7) Deamidated (O11)    | 33.9          |                                                                                                            |      |     |    |   |   |      |                                                       |      |                                                       |      |
|                                                                                |                |                                                             |      |       |               |                  |       |               | MRGCYLLAGKOTLTK Oxidation (M1) Carbamidomethyl (C4)                      | 21.8          |                                                                                                            |      |     |    |   |   |      |                                                       |      |                                                       |      |
|                                                                                |                |                                                             |      |       |               |                  |       |               | SLVPGVSYGEKR                                                             | 45.2          |                                                                                                            |      |     |    |   |   |      |                                                       |      |                                                       |      |
|                                                                                |                |                                                             |      |       |               |                  |       |               | SNVPLEDARYPKK                                                            | 19.5          |                                                                                                            |      |     |    |   |   |      |                                                       |      |                                                       |      |
| SNVPLEDARYPKYR                                                                 | 17.4           |                                                             |      |       |               |                  |       |               |                                                                          |               |                                                                                                            |      |     |    |   |   |      |                                                       |      |                                                       |      |
| YRMLRPLRDLVDCIFMDVAGPDQAR Oxidation (M3) Oxidation (M14) Carbamidomethyl (C11) | 19.7           |                                                             |      |       |               |                  |       |               |                                                                          |               |                                                                                                            |      |     |    |   |   |      |                                                       |      |                                                       |      |
| 86                                                                             | Tb927.9.6090   | TFIIIF-stimulated CTD phosphatase, putative                 | 1.00 | 315   | 22            | 9                | 8     | 19.2          | ILGNVLER                                                                 | 51.9          | LQADHALMDLIPMR                                                                                             | 24.1 |     |    |   |   |      |                                                       |      |                                                       |      |
|                                                                                |                |                                                             |      |       |               |                  |       |               | LQADHALMDLIPMR Oxidation (M8) Oxidation (M13)                            | 33.3          | NGVKEFLPNER Deamidated (N1)                                                                                | 33.7 |     |    |   |   |      |                                                       |      |                                                       |      |
|                                                                                |                |                                                             |      |       |               |                  |       |               | NGVKEFLPNER                                                              | 35.8          | SAASSTDLHELDHWR                                                                                            | 12.9 |     |    |   |   |      |                                                       |      |                                                       |      |
|                                                                                |                |                                                             |      |       |               |                  |       |               | OKLGNLTK                                                                 | 18.6          | VIEGEEVVAR                                                                                                 | 30.4 |     |    |   |   |      |                                                       |      |                                                       |      |
|                                                                                |                |                                                             |      |       |               |                  |       |               | OKLGNLTKER                                                               | 26.1          |                                                                                                            |      |     |    |   |   |      |                                                       |      |                                                       |      |
|                                                                                |                |                                                             |      |       |               |                  |       |               | SFPLHPRNGVKIEFLPNER                                                      | 29.5          |                                                                                                            |      |     |    |   |   |      |                                                       |      |                                                       |      |
|                                                                                |                |                                                             |      |       |               |                  |       |               | SFPLHPRNGVKIEFLPNER Deamidated (N8)                                      | 35.2          |                                                                                                            |      |     |    |   |   |      |                                                       |      |                                                       |      |
|                                                                                |                |                                                             |      |       |               |                  |       |               | VIEGEEVVAR                                                               | 26.9          |                                                                                                            |      |     |    |   |   |      |                                                       |      |                                                       |      |
|                                                                                |                |                                                             |      |       |               |                  |       |               | VVIDSDVR                                                                 | 20.3          |                                                                                                            |      |     |    |   |   |      |                                                       |      |                                                       |      |
|                                                                                |                |                                                             |      |       |               |                  |       |               | ALSDFISKR                                                                | 40.7          |                                                                                                            |      |     |    |   |   |      |                                                       |      |                                                       |      |
| 87                                                                             | Tb927.11.2050  | heat shock protein 84, putative                             | 1.00 | 388   | 24            | 8                | 6     | 14.5          | ELVNAQALEKR                                                              | 62.1          | FKKQDTEISPLNVR                                                                                             | 34.9 |     |    |   |   |      |                                                       |      |                                                       |      |
|                                                                                |                |                                                             |      |       |               |                  |       |               | FKKQDTEISPLNVR                                                           | 72.9          | FKKQDTEISPLNVR                                                                                             | 22.4 |     |    |   |   |      |                                                       |      |                                                       |      |
|                                                                                |                |                                                             |      |       |               |                  |       |               | FVIRDTOGIMTRELAEALNTIAGSGSK                                              | 25.1          | FVIRDTOGIMTRELAEALNTIAGSGSK                                                                                | 38.4 |     |    |   |   |      |                                                       |      |                                                       |      |
|                                                                                |                |                                                             |      |       |               |                  |       |               | FVIRDTOGIMTRELAEALNTIAGSGSK Oxidation (M10)                              | 14.8          | FVIRDTOGIMTRELAEALNTIAGSGSK Deamidated (N18)                                                               | 47.8 |     |    |   |   |      |                                                       |      |                                                       |      |
|                                                                                |                |                                                             |      |       |               |                  |       |               | FVIRDTOGIMTRELAEALNTIAGSGSK Oxidation (M10) - Deamidated (N18)           | 20.8          | KYRDTQAMAGAPK Oxidation (M8)                                                                               | 7.4  |     |    |   |   |      |                                                       |      |                                                       |      |
|                                                                                |                |                                                             |      |       |               |                  |       |               | HLMELSKPEEYPRGDEAPISITQSK Oxidation (M3) Carbamidomethyl (C26)           | 34.1          | KLYTSLSPSEEVETAGLVEQMFNVAAGLDEPR                                                                           | 45.5 |     |    |   |   |      |                                                       |      |                                                       |      |
|                                                                                |                |                                                             |      |       |               |                  |       |               | LHYVADPLSR                                                               | 33.1          | LHYVADPLSR                                                                                                 | 44.8 |     |    |   |   |      |                                                       |      |                                                       |      |
|                                                                                |                |                                                             |      |       |               |                  |       |               |                                                                          |               | QLLDVACSLYTEKEVFR Carbamidomethyl (C8)                                                                     | 42.6 |     |    |   |   |      |                                                       |      |                                                       |      |
|                                                                                |                |                                                             |      |       |               |                  |       |               | IGGGSWAYPGLDGAEGGDHPPTVTMR Oxidation (M27)                               | 45.7          | ADNWLDEFKOR                                                                                                | 33.6 |     |    |   |   |      |                                                       |      |                                                       |      |
|                                                                                |                |                                                             |      |       |               |                  |       |               | LLSEADDDAFTAPLSGAHEK                                                     | 43.1          | EPFOLGLSTVPSVWK                                                                                            | 49.1 |     |    |   |   |      |                                                       |      |                                                       |      |
| SPVNDLSVENQLLAEALREIAGESPR Carbamidomethyl (C4)                                | 38.0           | IGGGSWAYPGLDGAEGGDHPPTVTMR Oxidation (M27)                  | 10.2 |       |               |                  |       |               |                                                                          |               |                                                                                                            |      |     |    |   |   |      |                                                       |      |                                                       |      |
| SPVNDLSVENQLLAEALREIAGESPR Carbamidomethyl (C4) - Deamidated (O12)             | 37.5           | LLSEADDDAFTAPLSGAHEK                                        | 39.0 |       |               |                  |       |               |                                                                          |               |                                                                                                            |      |     |    |   |   |      |                                                       |      |                                                       |      |
| MRDEAEEGGRIADR                                                                 | 29.3           |                                                             |      |       |               |                  |       |               |                                                                          |               |                                                                                                            |      |     |    |   |   |      |                                                       |      |                                                       |      |
| SPVNDLSVENQLLAEALREIAGESPR Carbamidomethyl (C4)                                | 61.8           |                                                             |      |       |               |                  |       |               |                                                                          |               |                                                                                                            |      |     |    |   |   |      |                                                       |      |                                                       |      |
| SPVNDLSVENQLLAEALREIAGESPR Carbamidomethyl (C4) - Deamidated (N6)              | 40.3           |                                                             |      |       |               |                  |       |               |                                                                          |               |                                                                                                            |      |     |    |   |   |      |                                                       |      |                                                       |      |
| SVSPSTAEPKPK                                                                   | 35.1           |                                                             |      |       |               |                  |       |               |                                                                          |               |                                                                                                            |      |     |    |   |   |      |                                                       |      |                                                       |      |
| 88                                                                             | Tb927.11.13180 | hypothetical protein, conserved                             | 1.00 | 286   | 19            | 5                | 4     | 15.9          | IGGGSWAYPGLDGAEGGDHPPTVTMR Oxidation (M27)                               | 45.7          |                                                                                                            |      |     |    |   |   |      |                                                       |      |                                                       |      |
|                                                                                |                |                                                             |      |       |               |                  |       |               | LLSEADDDAFTAPLSGAHEK                                                     | 43.1          |                                                                                                            |      |     |    |   |   |      |                                                       |      |                                                       |      |
|                                                                                |                |                                                             |      |       |               |                  |       |               | SPVNDLSVENQLLAEALREIAGESPR Carbamidomethyl (C4)                          | 38.0          |                                                                                                            |      |     |    |   |   |      |                                                       |      |                                                       |      |
|                                                                                |                |                                                             |      |       |               |                  |       |               | SPVNDLSVENQLLAEALREIAGESPR Carbamidomethyl (C4) - Deamidated (O12)       | 37.5          |                                                                                                            |      |     |    |   |   |      |                                                       |      |                                                       |      |
|                                                                                |                |                                                             |      |       |               |                  |       |               | MRDEAEEGGRIADR                                                           | 29.3          |                                                                                                            |      |     |    |   |   |      |                                                       |      |                                                       |      |
|                                                                                |                |                                                             |      |       |               |                  |       |               | SPVNDLSVENQLLAEALREIAGESPR Carbamidomethyl (C4)                          | 61.8          |                                                                                                            |      |     |    |   |   |      |                                                       |      |                                                       |      |
|                                                                                |                |                                                             |      |       |               |                  |       |               | SPVNDLSVENQLLAEALREIAGESPR Carbamidomethyl (C4) - Deamidated (N6)        | 40.3          |                                                                                                            |      |     |    |   |   |      |                                                       |      |                                                       |      |
|                                                                                |                |                                                             |      |       |               |                  |       |               | SVSPSTAEPKPK                                                             | 35.1          |                                                                                                            |      |     |    |   |   |      |                                                       |      |                                                       |      |
|                                                                                |                |                                                             |      |       |               |                  |       |               | 89                                                                       | Tb927.9.10770 | Polyadenylate-binding protein 2 (Poly(A)-binding protein 2) (Poly(A)-binding protein II) (PABP2), putative | 1.00 | 353 | 38 | 9 | 8 | 22.0 | DLAGRPTVGFYVAYTHEAAAK                                 | 36.6 | AVIELDKESPLK                                          | 12.7 |
|                                                                                |                |                                                             |      |       |               |                  |       |               |                                                                          |               |                                                                                                            |      |     |    |   |   |      | IVYEKEEAVDAVR                                         | 21.5 | DLAGRPTVGFYVAYTHEAAAK                                 | 30.3 |
| LTAIGLATDEKGEISR                                                               | 68.3           | IVYEKEEAVDAVR                                               | 26.6 |       |               |                  |       |               |                                                                          |               |                                                                                                            |      |     |    |   |   |      |                                                       |      |                                                       |      |
| LTAIGLATDEKGEISRYAR                                                            | 33.9           | LTAIGLATDEKGEISR                                            | 69.8 |       |               |                  |       |               |                                                                          |               |                                                                                                            |      |     |    |   |   |      |                                                       |      |                                                       |      |
| NFDQVYSERLK                                                                    | 39.1           | NLDPSVDEKKEVSPFGEVTSK                                       | 37.8 |       |               |                  |       |               |                                                                          |               |                                                                                                            |      |     |    |   |   |      |                                                       |      |                                                       |      |
| NLDPSVDEKKEVSPFGEVTSK                                                          | 39.1           | NLDPSVDEKKEVSPFGEVTSK Deamidated (N1)                       | 26.8 |       |               |                  |       |               |                                                                          |               |                                                                                                            |      |     |    |   |   |      |                                                       |      |                                                       |      |
| NLDPSVDEKKEVSPFGEVTSK Deamidated (N1)                                          | 28.8           | SLGYGVYVFNQNPADAEKALDDAGVK                                  | 32.2 |       |               |                  |       |               |                                                                          |               |                                                                                                            |      |     |    |   |   |      |                                                       |      |                                                       |      |
| SLGYGVYVFNQNPADAEKALDDAGVK                                                     | 6.2            |                                                             |      |       |               |                  |       |               |                                                                          |               |                                                                                                            |      |     |    |   |   |      |                                                       |      |                                                       |      |
| SLGYGVYVFNQNPADAEKALDDAGVKLTK                                                  | 16.4           |                                                             |      |       |               |                  |       |               |                                                                          |               |                                                                                                            |      |     |    |   |   |      |                                                       |      |                                                       |      |
| 90                                                                             | Tb927.8.6580   | succinate dehydrogenase flavoprotein, putative              | 1.00 | 444   | 28            | 8                | 6     | 15.9          |                                                                          |               |                                                                                                            |      |     |    |   |   |      | AAMGVAASYNWACVSK Oxidation (M3) Carbamidomethyl (C14) | 57.5 | AAMGVAASYNWACVSK Oxidation (M3) Carbamidomethyl (C14) | 11.8 |
|                                                                                |                |                                                             |      |       |               |                  |       |               | AAMGVAASYNWACVSK Oxidation (M3) - Deamidated (N11) Carbamidomethyl (C14) | 31.8          | AFSGQSRYHYSK                                                                                               | 51.5 |     |    |   |   |      |                                                       |      |                                                       |      |
|                                                                                |                |                                                             |      |       |               |                  |       |               | AFSGQSRYHYSK                                                             | 56.8          | ATLELAGR                                                                                                   | 30.7 |     |    |   |   |      |                                                       |      |                                                       |      |
|                                                                                |                |                                                             |      |       |               |                  |       |               | AKDLASRDVYSR                                                             | 32.3          | AYPVIDHTFDCVVGAGGSGLR Carbamidomethyl (C11)                                                                | 62.5 |     |    |   |   |      |                                                       |      |                                                       |      |
|                                                                                |                |                                                             |      |       |               |                  |       |               | AYPVIDHTFDCVVGAGGSGLR Carbamidomethyl (C11)                              | 55.7          | ILHNKGDIPVAR                                                                                               | 42.6 |     |    |   |   |      |                                                       |      |                                                       |      |

Peptides

| Protein ID                               | Protein Name   | Accession                                                                                        | Start | End | Length | Score | Modifications | Peptide | Score                                            | Modifications | Peptide                                                   | Score |
|------------------------------------------|----------------|--------------------------------------------------------------------------------------------------|-------|-----|--------|-------|---------------|---------|--------------------------------------------------|---------------|-----------------------------------------------------------|-------|
| 91                                       | Tb927.11.7380  | glycerol-3-phosphate dehydrogenase (FAD-dependent), mitochondrial                                | 1.00  | 338 | 27     | 7     | 7             | 11.1    | SDAGESSIADLDKLNKGDIPVAR                          | 34.8          | LGANSLLDIVFVGK                                            | 61.8  |
|                                          |                |                                                                                                  |       |     |        |       |               |         | TKDGFYGR                                         | 51.9          | SCANTVFNLTK Carbamidomethyl (C2)                          | 67.8  |
|                                          |                |                                                                                                  |       |     |        |       |               |         | TKDGFYGR Deamidated (Q8)                         | 31.9          |                                                           |       |
| 92                                       | Tb927.9.2470   | nucleolar protein                                                                                | 1.00  | 345 | 24     | 12    | 11            | 18.5    | ARKSEEVAAHAALESFHGQ                              | 35.5          | ARKSEEVAAHAALESFHGQ                                       | 43.6  |
|                                          |                |                                                                                                  |       |     |        |       |               |         | IRMSHGAPILGR Oxidation (M3)                      | 27.4          | EPSPILKLPKPEEPVADVYSAQR                                   | 35.8  |
|                                          |                |                                                                                                  |       |     |        |       |               |         | KSEEVAAHAALESFHGQ                                | 55.0          | GRVECKPGTEELGVGAHELETPEEPK Carbamidomethyl (C5)           | 45.9  |
|                                          |                |                                                                                                  |       |     |        |       |               |         | LITDKTSVR                                        | 36.6          | KSEEVAAHAALESFHGQ                                         | 65.6  |
|                                          |                |                                                                                                  |       |     |        |       |               |         | MAPSSGTHIIDR Oxidation (M1)                      | 38.1          | MAPSSGTHIIDR Oxidation (M1)                               | 29.1  |
|                                          |                |                                                                                                  |       |     |        |       |               |         | MAPSSGTHIIDR Oxidation (M1)                      | 42.1          | SVYNAGGPFTR                                               | 24.9  |
|                                          |                |                                                                                                  |       |     |        |       |               |         | SVYNAGGPFTR                                      | 33.6          |                                                           |       |
|                                          |                |                                                                                                  |       |     |        |       |               |         | AIIEQVWR                                         | 37.7          | ALQDQYVQLVIEEDR                                           | 25.3  |
|                                          |                |                                                                                                  |       |     |        |       |               |         | IGGDYEWNTLAR                                     | 53.5          | ENFTNLTFEYVPLEASFTEHKSTPKEELQALLER Deamidated (Q31)       | 39.7  |
|                                          |                |                                                                                                  |       |     |        |       |               |         | IKNELALVAESLSEK                                  | 12.1          | IGGDYEWNTLAR                                              | 6.7   |
|                                          |                |                                                                                                  |       |     |        |       |               |         | KGASGALQAPLPVVR                                  | 45.5          | SAGRPSSEELFSLVR                                           | 28.4  |
|                                          |                |                                                                                                  |       |     |        |       |               |         | QIAAFTTR                                         | 27.5          | TLGKEPYYVQLQPEELK                                         | 45.6  |
|                                          |                |                                                                                                  |       |     |        |       |               |         | SAGRPSSEELFSLVR                                  | 38.0          | YGYALLGYNEAADDFDR                                         | 50.1  |
|                                          |                |                                                                                                  |       |     |        |       |               |         | TLGKEPYYVQLQPEELK                                | 18.1          |                                                           |       |
|                                          |                |                                                                                                  |       |     |        |       |               |         | TLGKEPYYVQLQPEELKMGQTVR Oxidation (M21)          | 24.3          |                                                           |       |
| VIGLPTSQHVR                              | 17.6           |                                                                                                  |       |     |        |       |               |         |                                                  |               |                                                           |       |
| VIGLPTSQHVR Deamidated (Q8)              | 8.3            |                                                                                                  |       |     |        |       |               |         |                                                  |               |                                                           |       |
| YGYALLGYNEAADDFDR                        | 3.9            |                                                                                                  |       |     |        |       |               |         |                                                  |               |                                                           |       |
| YGYALLGYNEAADDFDRGRR                     | 9.1            |                                                                                                  |       |     |        |       |               |         |                                                  |               |                                                           |       |
| 93                                       | Tb927.8.1160   | vacuolar-type Ca2-ATPase, putative                                                               | 0.65  | 104 | 7      | 3     | 3             | 5.4     | DTSNYGTLAGR                                      | 23.8          | GAEHPILLSGTVVSTAEADYILACAVGESSFGGK Carbamidomethyl (C24)  | 33.8  |
|                                          |                |                                                                                                  |       |     |        |       |               |         | IKTDGAWPEEPEGPFVWLLGIGDPLRPEVDAWR                | 43.7          | GELHFLFSVGDAPKPYEELGGVGEIAR Carbamidomethyl (C3)          | 37.8  |
|                                          |                |                                                                                                  |       |     |        |       |               |         | LIPVSEPFER                                       | 14.9          | GFAFPFTR                                                  | 47.6  |
| 94                                       | Tb927.7.2700   | NADH-cytochrome b5 reductase, putative                                                           | 1.00  | 366 | 29     | 9     | 9             | 38.0    | ALLVSGPPGFMK Oxidation (M12)                     | 55.7          | NFLGRPSNTTK                                               | 42.0  |
|                                          |                |                                                                                                  |       |     |        |       |               |         | KVIEETMPSPNCVKAKLLVSGPPGFMK Oxidation (M7)       | 34.6          | SPFSQSVYHSYK Deamidated (Q8)                              | 29.7  |
|                                          |                |                                                                                                  |       |     |        |       |               |         | NFLGRPSNTTK                                      | 34.6          | SPFSQSVYHSYK Deamidated (Q8)                              | 47.1  |
|                                          |                |                                                                                                  |       |     |        |       |               |         | SGQYEHGMLAGGTGTPMYQIAR Oxidation (M9)            | 43.2          | VDSIEVQSPYK Deamidated (Q8)                               | 49.8  |
|                                          |                |                                                                                                  |       |     |        |       |               |         | SPFSQSVYHSYK                                     | 27.5          |                                                           |       |
|                                          |                |                                                                                                  |       |     |        |       |               |         | SGQPLSCLYK                                       | 25.7          |                                                           |       |
|                                          |                |                                                                                                  |       |     |        |       |               |         | SGQPLSCLYKELPEAMVYKF Oxidation (M18)             | 24.8          |                                                           |       |
|                                          |                |                                                                                                  |       |     |        |       |               |         | VDSIEVQSPYK                                      | 45.0          |                                                           |       |
|                                          |                |                                                                                                  |       |     |        |       |               |         | VIETMPSPNCVKAKLLVSGPPGFMK Oxidation (M6)         | 19.1          |                                                           |       |
|                                          |                |                                                                                                  |       |     |        |       |               |         | VIETMPSPNCVKAKLLVSGPPGFMK Oxidation (M6)         | 19.1          |                                                           |       |
|                                          |                |                                                                                                  |       |     |        |       |               |         | VIIEEGEDIRRRQR                                   | 49.5          |                                                           |       |
|                                          |                |                                                                                                  |       |     |        |       |               |         | NLACSLLSHR Carbamidomethyl (C4)                  | 43.8          |                                                           |       |
|                                          |                |                                                                                                  |       |     |        |       |               |         | NLACSLLSHR Deamidated (N1)                       | 32.2          |                                                           |       |
|                                          |                |                                                                                                  |       |     |        |       |               |         | NVYACDESILPSLGGSLPILALGEK Carbamidomethyl (C5)   | 12.6          |                                                           |       |
|                                          |                |                                                                                                  |       |     |        |       |               |         | SVLIGDEADWYATPWDFRGDLLPR                         | 46.5          |                                                           |       |
| VLPFSLNLFSELAEHFESAGVGGATYPAWAPETFLVK    | 25.8           |                                                                                                  |       |     |        |       |               |         |                                                  |               |                                                           |       |
| VLPFSLNLFSELAEHFESAGVGGATYPAWAPETFLVKGR  | 24.0           |                                                                                                  |       |     |        |       |               |         |                                                  |               |                                                           |       |
| VQRLNVEGAGPR                             | 32.1           |                                                                                                  |       |     |        |       |               |         |                                                  |               |                                                           |       |
| 95                                       | Tb927.10.470   | choline dehydrogenase, putative                                                                  | 1.00  | 335 | 22     | 8     | 7             | 25.1    | IAVIEEGEDIRRRQR                                  | 49.5          | IAVIEEGEDIRRRQR                                           | 39.6  |
|                                          |                |                                                                                                  |       |     |        |       |               |         | NLACSLLSHR Carbamidomethyl (C4)                  | 43.8          | NVTHGVGIIQLKPK                                            | 35.5  |
|                                          |                |                                                                                                  |       |     |        |       |               |         | NLACSLLSHR Deamidated (N1)                       | 32.2          | NVYACDESILPSLGGSLPILALGEK Carbamidomethyl (C5)            | 20.2  |
| 96                                       | Tb927.8.1180   | vacuolar-type Ca2-ATPase 1                                                                       | 0.60  | 89  | 6      | 2     | 2             | 4.3     | DTSNYGTLAGR                                      | 23.8          | GAEHPILLSGTVVSTAEADYILACAVGESSFGGK Carbamidomethyl (C24)  | 33.8  |
|                                          |                |                                                                                                  |       |     |        |       |               |         | IKTDGAWPEEPEGPFVWLLGIGDPLRPEVDAWR                | 43.7          | GELHFLFSVGDAPKPYEELGGVGEIAR Carbamidomethyl (C3)          | 37.8  |
|                                          |                |                                                                                                  |       |     |        |       |               |         | LIPVSEPFER                                       | 14.9          | GFAFPFTR                                                  | 47.6  |
|                                          |                |                                                                                                  |       |     |        |       |               |         | IGTDGAWPEEPEGPFVWLLGIGDPLRPEVDAWR                | 72.9          | KGAEHPILLSGTVVSTAEADYILACAVGESSFGGK Carbamidomethyl (C25) | 47.0  |
|                                          |                |                                                                                                  |       |     |        |       |               |         | LGTSTDDGSEVSNR                                   | 65.1          | LGTSTDDGSEVSNR                                            | 65.1  |
|                                          |                |                                                                                                  |       |     |        |       |               |         | SGDNLDDNFR                                       | 61.6          | SRGFAFPFTR                                                | 31.5  |
|                                          |                |                                                                                                  |       |     |        |       |               |         | SRGFAFPFTR                                       | 31.5          | TDGKNKTDQALDFVDR                                          | 49.3  |
|                                          |                |                                                                                                  |       |     |        |       |               |         | TDGKNKTDQALDFVDR                                 | 49.3          |                                                           |       |
|                                          |                |                                                                                                  |       |     |        |       |               |         | AGLPPAFDVAHWNDEISR                               | 49.8          |                                                           |       |
|                                          |                |                                                                                                  |       |     |        |       |               |         | FLTQALHYNTGFAR                                   | 49.2          |                                                           |       |
|                                          |                |                                                                                                  |       |     |        |       |               |         | FLTQALHYNTGFAR Deamidated (N9)                   | 27.1          |                                                           |       |
|                                          |                |                                                                                                  |       |     |        |       |               |         | FLTQALHYNTGFAR Deamidated (Q4)                   | 37.2          |                                                           |       |
|                                          |                |                                                                                                  |       |     |        |       |               |         | RAQLPPAFDVAHWNDEISRGHLLR                         | 23.0          |                                                           |       |
|                                          |                |                                                                                                  |       |     |        |       |               |         | RPSLAQGR                                         | 25.5          |                                                           |       |
|                                          |                |                                                                                                  |       |     |        |       |               |         | YTNATFTPNPAAPYFTLK                               | 45.0          |                                                           |       |
| YTNATFTPNPAAPYFTLK Deamidated (N3)       | 32.9           |                                                                                                  |       |     |        |       |               |         |                                                  |               |                                                           |       |
| 97                                       | Tb927.11.13280 | mitochondrial RNA binding protein 2                                                              | 1.00  | 221 | 18     | 6     | 6             | 35.7    | AQLPPAFDVAHWNDEISRGHLLR                          | 27.9          | AGLPPAFDVAHWNDEISR                                        | 49.8  |
|                                          |                |                                                                                                  |       |     |        |       |               |         | FLTQALHYNTGFAR                                   | 57.4          | FLTQALHYNTGFAR                                            | 49.2  |
|                                          |                |                                                                                                  |       |     |        |       |               |         | RAQLPPAFDVAHWNDEISRGHLLR                         | 18.3          | FLTQALHYNTGFAR Deamidated (N9)                            | 6.7   |
|                                          |                |                                                                                                  |       |     |        |       |               |         | RPSLAQGR                                         | 18.3          | FLTQALHYNTGFAR Deamidated (Q4)                            | 37.2  |
|                                          |                |                                                                                                  |       |     |        |       |               |         | VLHRDTFVLDYHR                                    | 15.3          | RAQLPPAFDVAHWNDEISRGHLLR                                  | 23.0  |
|                                          |                |                                                                                                  |       |     |        |       |               |         | YTNATFTPNPAAPYFTLK                               | 42.2          | RPSLAQGR                                                  | 25.5  |
|                                          |                |                                                                                                  |       |     |        |       |               |         | YTNATFTPNPAAPYFTLK                               | 42.2          | YTNATFTPNPAAPYFTLK                                        | 45.0  |
|                                          |                |                                                                                                  |       |     |        |       |               |         | YTNATFTPNPAAPYFTLK Deamidated (N3)               | 32.9          |                                                           |       |
|                                          |                |                                                                                                  |       |     |        |       |               |         | AGDWWAYTCGTEGIGR                                 | 56.3          |                                                           |       |
|                                          |                |                                                                                                  |       |     |        |       |               |         | AWALDLNR                                         | 21.7          |                                                           |       |
|                                          |                |                                                                                                  |       |     |        |       |               |         | LLPESLRGEK                                       | 24.5          |                                                           |       |
|                                          |                |                                                                                                  |       |     |        |       |               |         | NHIEAAR                                          | 18.5          |                                                           |       |
|                                          |                |                                                                                                  |       |     |        |       |               |         | OTLNQGVNVR                                       | 57.8          |                                                           |       |
|                                          |                |                                                                                                  |       |     |        |       |               |         | OTLNQGVNVR Deamidated (Q1)                       | 22.9          |                                                           |       |
|                                          |                |                                                                                                  |       |     |        |       |               |         | OTLNQGVNVR Deamidated (Q5)                       | 43.7          |                                                           |       |
| TQSKLDEVAIEK                             | 34.7           |                                                                                                  |       |     |        |       |               |         |                                                  |               |                                                           |       |
| TQSKLDEVAIEK Deamidated (Q2)             | 24.1           |                                                                                                  |       |     |        |       |               |         |                                                  |               |                                                           |       |
| 98                                       | Tb927.5.1210   | short-chain dehydrogenase, putative                                                              | 1.00  | 387 | 29     | 9     | 6             | 22.5    | AGDWWAYTCGTEGIGR                                 | 56.3          | AGDWWAYTCGTEGIGR                                          | 64.6  |
|                                          |                |                                                                                                  |       |     |        |       |               |         | AWALDLNR                                         | 21.7          | LLPESLRGEK                                                | 18.6  |
|                                          |                |                                                                                                  |       |     |        |       |               |         | LLPESLRGEK                                       | 24.5          | OTLNQGVNVR                                                | 35.6  |
|                                          |                |                                                                                                  |       |     |        |       |               |         | NHIEAAR                                          | 18.5          | OTLNQGVNVR Deamidated (N10)                               | 29.6  |
|                                          |                |                                                                                                  |       |     |        |       |               |         | OTLNQGVNVR                                       | 57.8          | TQSKLDEVAIEK                                              | 64.6  |
|                                          |                |                                                                                                  |       |     |        |       |               |         | OTLNQGVNVR Deamidated (Q1)                       | 22.9          |                                                           |       |
|                                          |                |                                                                                                  |       |     |        |       |               |         | OTLNQGVNVR Deamidated (Q5)                       | 43.7          |                                                           |       |
|                                          |                |                                                                                                  |       |     |        |       |               |         | TQSKLDEVAIEK                                     | 34.7          |                                                           |       |
|                                          |                |                                                                                                  |       |     |        |       |               |         | TQSKLDEVAIEK Deamidated (Q2)                     | 24.1          |                                                           |       |
|                                          |                |                                                                                                  |       |     |        |       |               |         | ADAEANARRGSEDDYTK Deamidated (N6)                | 7.1           |                                                           |       |
|                                          |                |                                                                                                  |       |     |        |       |               |         | ADAEANARRGSEDDYTK Deamidated (N6)                | 7.1           |                                                           |       |
|                                          |                |                                                                                                  |       |     |        |       |               |         | ADAEANARRGSEDDYTK Deamidated (N6)                | 7.1           |                                                           |       |
|                                          |                |                                                                                                  |       |     |        |       |               |         | ADAEANARRGSEDDYTK Deamidated (N6)                | 7.1           |                                                           |       |
|                                          |                |                                                                                                  |       |     |        |       |               |         | ADAEANARRGSEDDYTK Deamidated (N6)                | 7.1           |                                                           |       |
|                                          |                |                                                                                                  |       |     |        |       |               |         | ADAEANARRGSEDDYTK Deamidated (N6)                | 7.1           |                                                           |       |
| ADAEANARRGSEDDYTK Deamidated (N6)        | 7.1            |                                                                                                  |       |     |        |       |               |         |                                                  |               |                                                           |       |
| 99                                       | Tb927.6.2170   | co-chaperone GrpE, putative                                                                      | 1.00  | 343 | 31     | 9     | 9             | 58.1    | AYGTSFQRKMLDVEDTLER Oxidation (M11)              | 13.8          | ADAEANARRGSEDDYTK Deamidated (N6)                         | 7.1   |
|                                          |                |                                                                                                  |       |     |        |       |               |         | FDPNRDKALLKVPPTAEAPPGHSTYK                       | 36.0          | ARGTSEGRKLDVDTLER                                         | 29.3  |
|                                          |                |                                                                                                  |       |     |        |       |               |         | GLEATKLPQAEVGHKTLSSHTGK                          | 16.0          | FDPNRDKALLKVPPTAEAPPGHSTYK                                | 45.3  |
|                                          |                |                                                                                                  |       |     |        |       |               |         | IAELKKEVLYR                                      | 42.1          | GLEATKLPQAEVGHKTLSSHTGK Deamidated (G10)                  | 43.8  |
|                                          |                |                                                                                                  |       |     |        |       |               |         | ISEEDVPAK                                        | 38.1          |                                                           |       |
|                                          |                |                                                                                                  |       |     |        |       |               |         | LSKLLLNNAK                                       | 36.5          |                                                           |       |
|                                          |                |                                                                                                  |       |     |        |       |               |         | TGYKIQR                                          | 28.8          |                                                           |       |
|                                          |                |                                                                                                  |       |     |        |       |               |         | VLRASQVGSWSD                                     | 40.4          |                                                           |       |
|                                          |                |                                                                                                  |       |     |        |       |               |         | VPPITAEAPPGHSTYK                                 | 21.2          |                                                           |       |
|                                          |                |                                                                                                  |       |     |        |       |               |         | AAADLNFPVGR                                      | 50.9          |                                                           |       |
|                                          |                |                                                                                                  |       |     |        |       |               |         | AAADLNFPVGR Deamidated (N7)                      | 47.3          |                                                           |       |
|                                          |                |                                                                                                  |       |     |        |       |               |         | AQLEFPVGR                                        | 49.1          |                                                           |       |
|                                          |                |                                                                                                  |       |     |        |       |               |         | CGASAAYCAALLEYLTSEVIELAGAAK Carbamidomethyl (C1) | 54.5          |                                                           |       |
|                                          |                |                                                                                                  |       |     |        |       |               |         | GGVVPVHK                                         | 33.9          |                                                           |       |
|                                          |                |                                                                                                  |       |     |        |       |               |         | HLLAIRGDEELNGVNTIAR                              | 36.5          |                                                           |       |
| HLLAIRGDEELNGVNTIAR Deamidated (N13)     | 25.0           |                                                                                                  |       |     |        |       |               |         |                                                  |               |                                                           |       |
| HLLAIRGDEELNGVNTIAR Deamidated (N17)     | 32.5           |                                                                                                  |       |     |        |       |               |         |                                                  |               |                                                           |       |
| HLLAIRGDEELNGVNTIAR Deamidated (G14)     | 9.1            |                                                                                                  |       |     |        |       |               |         |                                                  |               |                                                           |       |
| HLLAIRGDEELNGVNTIAR Deamidated (G14)     | 6.3            |                                                                                                  |       |     |        |       |               |         |                                                  |               |                                                           |       |
| 100                                      | Tb927.7.6360   | histone H2A variant                                                                              | 1.00  | 459 | 43     | 10    | 5             | 40.2    | AAADLNFPVGR                                      | 50.9          |                                                           |       |
|                                          |                |                                                                                                  |       |     |        |       |               |         | AAADLNFPVGR Deamidated (N7)                      | 47.3          |                                                           |       |
|                                          |                |                                                                                                  |       |     |        |       |               |         | AQLEFPVGR                                        | 49.1          |                                                           |       |
|                                          |                |                                                                                                  |       |     |        |       |               |         | CGASAAYCAALLEYLTSEVIELAGAAK Carbamidomethyl (C1) | 54.5          |                                                           |       |
|                                          |                |                                                                                                  |       |     |        |       |               |         | GGVVPVHK                                         | 33.9          |                                                           |       |
|                                          |                |                                                                                                  |       |     |        |       |               |         | HLLAIRGDEELNGVNTIAR                              | 36.5          |                                                           |       |
|                                          |                |                                                                                                  |       |     |        |       |               |         | HLLAIRGDEELNGVNTIAR Deamidated (N13)             | 25.0          |                                                           |       |
|                                          |                |                                                                                                  |       |     |        |       |               |         | HLLAIRGDEELNGVNTIAR Deamidated (N17)             | 32.5          |                                                           |       |
|                                          |                |                                                                                                  |       |     |        |       |               |         | HLLAIRGDEELNGVNTIAR Deamidated (G14)             | 9.1           |                                                           |       |
|                                          |                |                                                                                                  |       |     |        |       |               |         | HLLAIRGDEELNGVNTIAR Deamidated (G14)             | 6.3           |                                                           |       |
|                                          |                |                                                                                                  |       |     |        |       |               |         | ASEHREGGDGSVPLVPPSKQLTSAEAEELLK                  | 22.4          |                                                           |       |
|                                          |                |                                                                                                  |       |     |        |       |               |         | GAPHVIEIEMHNQDENDSVVDIKLASR Oxidation (M9)       | 23.4          |                                                           |       |
|                                          |                |                                                                                                  |       |     |        |       |               |         | GAPHVIEIEMHNQDENDSVVDIKLASR Oxidation (M9)       | 23.4          |                                                           |       |
|                                          |                |                                                                                                  |       |     |        |       |               |         | GAPHVIEIEMHNQDENDSVVDIKLASR Oxidation (M9)       | 47.2          |                                                           |       |
|                                          |                |                                                                                                  |       |     |        |       |               |         | GAPHVIEIEMHNQDENDSVVDIKLASR Deamidated (N12)     | 36.5          |                                                           |       |
| GYPYCAMTGGDGNAPALKR Carbamidomethyl (C4) | 16.4           |                                                                                                  |       |     |        |       |               |         |                                                  |               |                                                           |       |
| GYPYCAMTGGDGNAPALKR Oxidation (M6)       | 35.3           |                                                                                                  |       |     |        |       |               |         |                                                  |               |                                                           |       |
| GYPYCAMTGGDGNAPALKR Oxidation (M6)       | 35.3           |                                                                                                  |       |     |        |       |               |         |                                                  |               |                                                           |       |
| GYPYCAMTGGDGNAPALKR Oxidation (M6)       | 35.3           |                                                                                                  |       |     |        |       |               |         |                                                  |               |                                                           |       |
| GYPYCAMTGGDGNAPALKR Oxidation (M6)       | 35.3           |                                                                                                  |       |     |        |       |               |         |                                                  |               |                                                           |       |
| GYPYCAMTGGDGNAPALKR Oxidation (M6)       | 35.3           |                                                                                                  |       |     |        |       |               |         |                                                  |               |                                                           |       |
| GYPYCAMTGGDGNAPALKR Oxidation (M6)       | 35.3           |                                                                                                  |       |     |        |       |               |         |                                                  |               |                                                           |       |
| GYPYCAMTGGDGNAPALKR Oxidation (M6)       | 35.3           |                                                                                                  |       |     |        |       |               |         |                                                  |               |                                                           |       |
| 101                                      | Tb927.10.12500 | P-type H-ATPase, putative                                                                        | 1.00  | 230 | 25     | 7     | 5             | 14.5    | ASEHREGGDGSVPLVPPSKQLTSAEAEELLK                  | 22.4          | ASEHREGGDGSVPLVPPSKQLTSAEAEELLK                           | 36.7  |
|                                          |                |                                                                                                  |       |     |        |       |               |         | GAPHVIEIEMHNQDENDSVVDIKLASR Oxidation (M9)       | 23.4          | FOVPLVIEIEMHNQDENDSVVDIKLASR Oxidation (M9)               | 35.3  |
|                                          |                |                                                                                                  |       |     |        |       |               |         | GAPHVIEIEMHNQDENDSVVDIKLASR Oxidation (M9)       | 47.2          | GAPHVIEIEMHNQDENDSVVDIKLASR Oxidation (M9)                | 35.3  |
| 102                                      | Tb927.5.3810   | ornithine-5-phosphate decarboxylase/ornithine decarboxylase, putative, OMPCase-OPRTase, putative | 1.00  | 414 | 24     | 8     | 8             | 25.1    | ACAPTLWILVPGVGAQGGDLK Carbamidomethyl (C2)       | 20.8          | ACAPTLWILVPGVGAQGGDLK Carbamidomethyl (C2)                | 38.8  |
|                                          |                |                                                                                                  |       |     |        |       |               |         | ADTAAVALECKR Carbamidomethyl (C11)               | 42.6          | ACAPTLWILVPGVGAQGGDLK Carbamidomethyl (C2)                | 24.4  |
|                                          |                |                                                                                                  |       |     |        |       |               |         | AWAQLCEDINR Carbamidomethyl (C7)                 | 45.8          | ADTAAVALECKR Carbamidomethyl (C11)                        | 22.5  |
|                                          |                |                                                                                                  |       |     |        |       |               |         | AWAQLCEDINR Carbamidomethyl (C7)                 | 28.6          | AWAQLCEDINR Carbamidomethyl (C7)                          | 30.8  |
|                                          |                |                                                                                                  |       |     |        |       |               |         | AWAQLCEDINR Carbamidomethyl (C7)                 | 28.6          |                                                           |       |
|                                          |                |                                                                                                  |       |     |        |       |               |         | AWAQLCEDINR Carbamidomethyl (C7)                 | 28.6          |                                                           |       |
|                                          |                |                                                                                                  |       |     |        |       |               |         | AWAQLCEDINR Carbamidomethyl (C7)                 | 28.6          |                                                           |       |
|                                          |                |                                                                                                  |       |     |        |       |               |         | AWAQLCEDINR Carbamidomethyl (C7)                 | 28.6          |                                                           |       |
|                                          |                |                                                                                                  |       |     |        |       |               |         | AWAQLCEDINR Carbamidomethyl (C7)                 | 28.6          |                                                           |       |
|                                          |                |                                                                                                  |       |     |        |       |               |         | AWAQLCEDINR Carbamidomethyl (C7)                 | 28.6          |                                                           |       |
|                                          |                |                                                                                                  |       |     |        |       |               |         | AWAQLCEDINR Carbamidomethyl (C7)                 | 28.6          |                                                           |       |
|                                          |                |                                                                                                  |       |     |        |       |               |         | AWAQLCEDINR Carbamidomethyl (C7)                 | 28.6          |                                                           |       |
|                                          |                |                                                                                                  |       |     |        |       |               |         | AWAQLCEDINR Carbamidomethyl (C7)                 | 28.6          |                                                           |       |
|                                          |                |                                                                                                  |       |     |        |       |               |         | AWAQLCEDINR Carbamidomethyl (C7)                 | 28.6          |                                                           |       |
|                                          |                |                                                                                                  |       |     |        |       |               |         | AWAQLCEDINR Carbamidomethyl (C7)                 | 28.6          |                                                           |       |





Peptides

| Accession      | Protein Name                       | Start                                                                                  | End  | Length | Score | Modifications | Peptide                                                                                                       | Score                                       | Modifications | Peptide                                                                                                                                                                                                                                                                            | Score                                                                        |      |     |    |   |   |      |                                                                                                                                                                                                                                                                                  |                                                      |
|----------------|------------------------------------|----------------------------------------------------------------------------------------|------|--------|-------|---------------|---------------------------------------------------------------------------------------------------------------|---------------------------------------------|---------------|------------------------------------------------------------------------------------------------------------------------------------------------------------------------------------------------------------------------------------------------------------------------------------|------------------------------------------------------------------------------|------|-----|----|---|---|------|----------------------------------------------------------------------------------------------------------------------------------------------------------------------------------------------------------------------------------------------------------------------------------|------------------------------------------------------|
| Tb927.10.14710 | 40S ribosomal protein S2, putative |                                                                                        |      |        |       |               | GAGVAAPVK<br>GAGVAAPVKK<br>GAGVAAPVKKLEFAGVEDVYSSCGK Carbamidomethyl (C27)<br>LSVPPVR<br>RGRGRGR<br>VKEVSLAIR | 32.2<br>41.9<br>8.2<br>29.9<br>31.4<br>27.9 |               |                                                                                                                                                                                                                                                                                    |                                                                              |      |     |    |   |   |      |                                                                                                                                                                                                                                                                                  |                                                      |
| 129            | Tb927.9.3170                       | cytochrome oxidase subunit V                                                           | 1.00 | 420    | 36    | 10            | 9                                                                                                             | 48.0                                        |               | GAASLESLYR<br>GAEPDHFVGTWVIERPEPKDGNK Deamidated (N25)<br>GAEPDHFVGTWVIERPEPKDGNKSN Deamidated (N25)<br>KPEVNDRIK<br>SLEETMWEATPR<br>SLEETMWEATPR Oxidation (M6)<br>SQVASTMDPRDADVLR Oxidation (M7)<br>SQVASTMDPRDADVLR Oxidation (M7)<br>VFLPPLGDPHR<br>VFLPPLGDPHRLK             | 73.9<br>29.3<br>19.2<br>26.9<br>60.9<br>41.2<br>40.3<br>28.2<br>17.1<br>23.0 | 0.00 | 4   | 1  | 1 | 1 | 6.1  | VFLPPLGDPHR                                                                                                                                                                                                                                                                      | 4.4                                                  |
| 130            | Tb927.10.520                       | hypothetical protein, conserved                                                        | 1.00 | 494    | 49    | 10            | 7                                                                                                             | 21.0                                        |               | AAAKGDNAAAVEGR<br>AAAKGDNAAAVEGR Deamidated (N8)<br>AAAKGDNAAAVEGRHTA<br>AAAKGDNAAAVEGRHTA Deamidated (N8)<br>LLAERAAAKGDNAAAVEGR<br>MDSQSYLAK<br>RLEFENGPLRDQVEAHTQR<br>RLEFENGPLRDQVEAHTQR Deamidated (N6)<br>SMNPTFPLMLAR Oxidation (M2), Oxidation (M9)<br>YGPIDVFGSETPSPDYHKK | 65.1<br>82.8<br>49.0<br>38.9<br>13.5<br>23.3<br>22.7<br>31.6<br>26.3<br>28.8 | 1.00 | 209 | 14 | 4 | 2 | 8.6  | AAAKGDNAAAVEGR<br>AAAKGDNAAAVEGR Deamidated (N8)<br>RLEFENGPLRDQVEAHTQR<br>RLEFENGPLRDQVEAHTQR Deamidated (N6)                                                                                                                                                                   | 67.8<br>67.1<br>21.9<br>17.3                         |
| 131            | Tb927.11.1090                      | calpain-like protein, putative, cytoskeleton associated protein, putative              | 1.00 | 248    | 31    | 8             | 7                                                                                                             | 2.2                                         |               | ASGEVPLALTVGSPDANVR<br>IAELEAMNEHSHKLAK Oxidation (M8)<br>IAELEAMNEHSHKLAK Oxidation (M8)<br>IAELEAMNEHSHKLAK Oxidation (M8), Deamidated (N9)<br>IAELEAMNEHSHKLAK Oxidation (M8)<br>LIAEDREGNAR<br>LIAEDREGNAR<br>YLNPEPEGVLELLPLNEDEVSEKEDRLR                                     | 20.3<br>25.6<br>36.8<br>21.3<br>35.9<br>26.1<br>20.9<br>8.5                  | 0.39 | 53  | 5  | 2 | 2 | 0.4  | LIAEDREGNAR<br>LIAEDREGNAR                                                                                                                                                                                                                                                       | 21.8<br>22.7                                         |
| 132            | Tb927.8.7530                       | 3,2-trans-enoyl-CoA isomerase, mitochondrial precursor, putative                       | 1.00 | 150    | 7     | 4             | 4                                                                                                             | 16.8                                        |               | FLSVPOGSR<br>IGLNELKLGITPPWVWVAVYVLSGR<br>LGITPPWVWVAVYVLSGR<br>VGLVLDVVDGEQQLREAVLKEAER                                                                                                                                                                                           | 30.7<br>29.4<br>8.6<br>54.4                                                  | 1.00 | 344 | 13 | 7 | 6 | 18.4 | IGLNELKLGITPPWVWVAVYVLSGR<br>LGITPPWVWVAVYVLSGR<br>MLQLGDTPTADEARVGLVLDVVDGEQQLR Deamidated (G28)<br>VGLVLDVVDGEQQLR Deamidated (G12)<br>VGLVLDVVDGEQQLREAVLKEAER<br>VGLVLDVVDGEQQLREAVLKEAER Deamidated (G12)                                                                   | 23.7<br>36.5<br>42.9<br>62.7<br>35.7<br>65.9<br>47.3 |
| 133            | Tb927.10.450                       | hypothetical protein, conserved                                                        | 1.00 | 104    | 9     | 4             | 4                                                                                                             | 14.4                                        |               | IVAGHEPEQTNALLQSLAALPSDKK Carbamidomethyl (C20)<br>MFVNPDLTR Oxidation (M1)<br>NIBSDNAAAGVWR Oxidation (M2)<br>VIEQQARPTKDSGDTLQDGEAKYLGQQALR                                                                                                                                      | 11.5<br>18.1<br>35.3<br>29.5                                                 | 0.99 | 41  | 2  | 1 | 1 | 4.8  | IVAGHEPEQTNALLQSLAALPSDKK Carbamidomethyl (C20)                                                                                                                                                                                                                                  | 37.1                                                 |
| 134            | Tb927.11.13990<br>Tb927.11.13190   | elongation factor 1 gamma, putative<br>elongation factor 1 gamma, putative             | 0.99 | 342    | 29    | 9             | 7                                                                                                             | 21.0                                        |               | ITDYLWVEGPTIPKPLEGR Carbamidomethyl (G6)<br>KKNRDELPPSPVLDFAKR<br>KKNRDELPPSPVLDFAKR Deamidated (N4)<br>LDKSGFLYGR<br>LLVVAFAFNVPTVK<br>LLVVAFAFNVPTVK Deamidated (N8)<br>SQGATGPKVAK<br>TVEVLSQGATGPKV<br>TVEVLSQGATGPKVAK                                                        | 55.7<br>34.4<br>18.8<br>36.2<br>30.1<br>4.1<br>43.8<br>26.5<br>38.6          | 0.75 | 111 | 7  | 2 | 2 | 8.7  | ITDYLWVEGPTIPKPLEGR Carbamidomethyl (G6)<br>LLVVAFAFNVPTVK                                                                                                                                                                                                                       | 36.8<br>49.3                                         |
| 135            | Tb927.7.1730                       | 60S ribosomal protein L7, putative                                                     | 1.00 | 433    | 29    | 8             | 8                                                                                                             | 38.8                                        |               | AAFKQQTENFRK<br>AAANKVAAALAK<br>AAANKVAAALAK<br>AVEPYIAYGYSLSLTVR<br>AVPAPESAIR<br>HFVEGGYGRDRLNLR<br>PKAVAPESAIR<br>TVTNGLWPKLPPAGGMR Deamidated (N4), Oxidation (M18)                                                                                                            | 34.0<br>56.4<br>76.1<br>58.4<br>25.1<br>29.2<br>37.1<br>57.1                 | 0.86 | 244 | 17 | 7 | 6 | 29.8 | AAFKQQTENFRK<br>AAANKVAAALAK<br>AAANKVAAALAK<br>AAANKVAAALAK Deamidated (N5)<br>AVEPYIAYGYSLSLTVR<br>AVPAPESAIR<br>HFVEGGYGRDRLNLR                                                                                                                                               | 33.5<br>37.2<br>51.5<br>24.6<br>20.6<br>59.1<br>23.9 |
| 136            | Tb927.6.1520                       | aquaporin 3, putative                                                                  | 1.00 | 173    | 7     | 3             | 1                                                                                                             | 10.3                                        |               | SANPQEKNEVELGDNADNEAHDADVNYWAPR<br>SANPQEKNEVELGDNADNEAHDADVNYWAPR Deamidated (N16)<br>SANPQEKNEVELGDNADNEAHDADVNYWAPR Deamidated (G5)                                                                                                                                             | 56.1<br>52.3<br>50.0                                                         | 1.00 | 243 | 6  | 5 | 1 | 10.3 | SANPQEKNEVELGDNADNEAHDADVNYWAPR Deamidated (N10)<br>SANPQEKNEVELGDNADNEAHDADVNYWAPR Deamidated (N16), Deamidated (N19)<br>SANPQEKNEVELGDNADNEAHDADVNYWAPR Deamidated (N19)<br>SANPQEKNEVELGDNADNEAHDADVNYWAPR Deamidated (N3)<br>SANPQEKNEVELGDNADNEAHDADVNYWAPR Deamidated (G5) | 45.2<br>43.5<br>40.2<br>59.1<br>54.7                 |
| 137            | Tb927.11.6250                      | hypothetical protein, conserved                                                        | 1.00 | 190    | 20    | 5             | 4                                                                                                             | 23.1                                        |               | AAQDSVLR<br>SAQDPLFSGVSTVYVR<br>SAQDPLFSGVSTVYVR Deamidated (G3)<br>SVLAWAQLRELGLSSEADKVEAAASK<br>VAGGRVQTK                                                                                                                                                                        | 15.4<br>64.3<br>36.6<br>8.9<br>27.7                                          | 1.00 | 237 | 9  | 3 | 2 | 16.4 | SAQDPLFSGVSTVYVR<br>SAQDPLFSGVSTVYVR Deamidated (G3)<br>SVLAWAQLRELGLSSEADKVEAAASK                                                                                                                                                                                               | 61.4<br>62.5<br>49.0                                 |
| 138            | Tb927.11.3590<br>Tb927.11.3600     | 40S ribosomal protein S4, putative<br>40S ribosomal protein S4, putative               | 0.97 | 268    | 25    | 8             | 7                                                                                                             | 33.3                                        |               | ATNIFVIGKMSVVPVTLK Deamidated (N3)<br>ATNIFVIGKMSVVPVTLK Oxidation (M11)<br>IRIGDVAR<br>KIEVSIERHPGAFDIAR<br>RVIQEREK<br>LKDASGHEFATR<br>LTGVFAPRR<br>VNVVYTGTRIPVWTHDHR                                                                                                           | 22.1<br>25.1<br>21.9<br>42.2<br>8.4<br>27.1<br>44.9<br>30.5                  | 0.75 | 115 | 6  | 2 | 2 | 11.0 | KIEVSIERHPGAFDIAR<br>LKDASGHEFATR                                                                                                                                                                                                                                                | 24.0<br>38.3                                         |
| 139            | Tb927.7.3550                       | hypothetical protein, conserved                                                        | 1.00 | 330    | 26    | 9             | 8                                                                                                             | 8.5                                         |               | CGAFEGQAKVPR Carbamidomethyl (C1)<br>DSSGRRESLFLVYR<br>IVSSGRFELLNDSALTVK<br>LVTWHRK<br>LIMONIEER Oxidation (M2)<br>SQMLQLTPK Oxidation (M3)<br>TNSLQRVMEDEELNQPAPLPPTLDELK Oxidation (M8)<br>VMEDEELNQPAPLPPTLDELK<br>VMEDEELNQPAPLPPTLDELK Oxidation (M2)                        | 29.6<br>34.0<br>32.7<br>18.1<br>27.4<br>30.1<br>23.2<br>27.3<br>47.5         | 0.27 | 33  | 2  | 2 | 2 | 2.6  | AEGKPTSEASSDVGAAANTR<br>LVTWHRK                                                                                                                                                                                                                                                  | 24.1<br>9.2                                          |
| 140            | Tb927.3.4760                       | dynamn, putative, vacuolar sortin protein 1, putative                                  | 1.00 | 346    | 17    | 7             | 7                                                                                                             | 14.7                                        |               | CPVLQVQLVPR Carbamidomethyl (C1)<br>FFDFSEINEIQNR<br>LISVNDLHDAFANVK<br>SATTAMTALTK Oxidation (M6), Oxidation (M7)<br>SSVLEAVKDFLPR<br>TVGELLAEPPOAQR<br>TVLDSVREFALI                                                                                                              | 50.0<br>38.1<br>40.6<br>43.7<br>51.4<br>39.2<br>48.1                         | 1.00 | 210 | 8  | 5 | 4 | 8.0  | CPVLQVQLVPR Carbamidomethyl (C1)<br>FFDFSEINEIQNR<br>FFDFSEINEIQNR Deamidated (N8)<br>SSVLEAVKDFLPR<br>TVLDSVREFALI                                                                                                                                                              | 46.5<br>62.3<br>38.8<br>31.3<br>33.3                 |
| 141            | Tb927.6.10310                      | mitochondrial carrier protein, putative, mitochondrial phosphate transporter, putative | 1.00 | 219    | 22    | 4             | 4                                                                                                             | 23.0                                        |               | ADPAAGFPKSLVLSWR<br>CIGGVLSCGLTHTAVCLDVVK Carbamidomethyl (C1), Carbamidomethyl (C9), Carbamidomethyl (C17)<br>SYQIANEIGYGLCTK Carbamidomethyl (C15)<br>YANPDHNSYYLK                                                                                                               | 19.4<br>39.3<br>60.4<br>45.1                                                 | 1.00 | 212 | 10 | 6 | 3 | 17.7 | CIGGVLSCGLTHTAVCLDVVK Carbamidomethyl (C1), Carbamidomethyl (C9), Carbamidomethyl (C17)<br>GIGSGFVLAEDGFYAK<br>YANPDHNSYYLK<br>YANPDHNSYYLK Deamidated (N10)<br>YANPDHNSYYLK Deamidated (N3)<br>YANPDHNSYYLK Deamidated (N3), Deamidated (N8)                                    | 36.7<br>32.1<br>33.7<br>31.3<br>24.7<br>29.4         |

Peptides

|     |                |                                                                                         |      |     |    |   |   |      |                                                                                                                                                                                                                                                                                                                          |                                                                      |      |     |    |   |   |      |                                                                                                                                                                                                               |                                                      |
|-----|----------------|-----------------------------------------------------------------------------------------|------|-----|----|---|---|------|--------------------------------------------------------------------------------------------------------------------------------------------------------------------------------------------------------------------------------------------------------------------------------------------------------------------------|----------------------------------------------------------------------|------|-----|----|---|---|------|---------------------------------------------------------------------------------------------------------------------------------------------------------------------------------------------------------------|------------------------------------------------------|
| 142 | Tb927.9.10400  | hypothetical protein, conserved                                                         | 1.00 | 315 | 21 | 6 | 6 | 10.1 | ESNYIEAADALKASNPVEIK<br>ESNYIEAADALKASNPVEKAGR<br>GLKFSALAKK<br>LPKDELDQVYR<br>YLRSNYIEAADALK<br>YLRSNYIEAADALKASNPVEIK                                                                                                                                                                                                  | 55.0<br>47.0<br>31.4<br>52.6<br>25.9<br>36.5                         | 1.00 | 111 | 7  | 2 | 2 | 4.9  | ESNYIEAADALK<br>LPKDELDQVYR                                                                                                                                                                                   | 49.3<br>51.1                                         |
| 143 | Tb927.10.14500 | hypothetical protein, conserved                                                         | 1.00 | 324 | 25 | 7 | 7 | 22.9 | AAADAENFETLKR<br>ATLLKNGPTTN<br>LVLVLEKGR<br>TGKGRPRPFDAPEEQVYR<br>TGKGRPRPFDAPEEQVYR<br>TIGTLNTYGRPFESAGVWVCR Carbamidomethyl (C2)<br>VKAADAENFETLKR                                                                                                                                                                    | 42.6<br>33.8<br>34.8<br>31.5<br>31.0<br>26.6<br>46.9                 | 0.00 | 20  | 2  | 2 | 2 | 12.2 | TGKGRPRPFDAPEEQVYR<br>TVARDPWRNRDAALGAVLHR                                                                                                                                                                    | 5.1<br>15.1                                          |
| 144 | Tb927.7.1300   | protein disulfide isomerase, putative                                                   | 1.00 | 251 | 19 | 5 | 5 | 18.0 | AAAGAKDKVLAK<br>AFVSYLNGIK<br>ALGEGAMHYR Oxidation (M7)<br>IATNVLENGHEYSKEHER Deamidated (N8)<br>YKVEGYTLVFFPK                                                                                                                                                                                                           | 41.6<br>47.1<br>58.7<br>35.2<br>39.6                                 | 1.00 | 90  | 6  | 2 | 2 | 6.1  | AFVSYLNGIK<br>LLAQIQWSPK                                                                                                                                                                                      | 15.8<br>61.8                                         |
| 145 | Tb927.10.3940  | 40S ribosomal protein S3A, putative                                                     | 1.00 | 371 | 27 | 9 | 9 | 33.2 | FTVQEVQR<br>IADFLR<br>IADFLRGR<br>KEWYDVWPK<br>LAKLNDVSLTR<br>NEVLRQFAK<br>TICKNTGKIAADFLR Carbamidomethyl (C3)<br>VKFTVQEVQR<br>VYEGNLADLNKTONEDDAYRK                                                                                                                                                                   | 44.4<br>28.8<br>23.7<br>45.2<br>18.2<br>30.2<br>30.0<br>30.0<br>24.4 | 0.00 | 0   | 0  | 0 | 0 | 0.0  |                                                                                                                                                                                                               |                                                      |
| 146 | Tb927.2.4710   | RNA binding protein, putative                                                           | 1.00 | 257 | 23 | 6 | 5 | 17.0 | FRDDYKVAWR<br>HLPDDATEQGLR<br>NFFAAVGEVPDIFHER<br>NFFAAVGEVPDIFHER Deamidated (N1)<br>NMFQSGATLDFLEPR Oxidation (M2)<br>VAGLADGTADDVREFFTR                                                                                                                                                                               | 28.7<br>24.9<br>55.5<br>35.5<br>34.3<br>17.5                         | 1.00 | 258 | 31 | 4 | 4 | 12.0 | NFFAAVGEVPDIFHER<br>NMFQSGATLDFLEPR<br>VAGLADGTADDVREFFTR                                                                                                                                                     | 66.8<br>52.5<br>40.0<br>26.4                         |
| 147 | Tb927.11.2060  | 60S acidic ribosomal subunit protein, putative                                          | 0.98 | 286 | 25 | 8 | 7 | 34.9 | ATAFFQALNIATK<br>DLRKGELVWIK Oxidation (M10)<br>LGGGEAAPAAAAAAPAAAAAEEEEEDDDFGMGALF Oxidation (M38)<br>SSQDHWYR<br>TAVLEKLGSGEAAAAAAPAAAAAEEEEEDDDFGMGALF Oxidation (M45)<br>VGAAPCDVVPAGNTGMEPK Carbamidomethyl (C7) Oxidation (M18)<br>VFLCLMNVN Carbamidomethyl (C4)<br>VFLCLMNVN Carbamidomethyl (C4) Oxidation (M6) | 58.9<br>21.4<br>35.1<br>15.7<br>31.0<br>25.8<br>33.4<br>28.5         | 0.85 | 134 | 5  | 4 | 3 | 13.6 | ATAFFQALNIATK<br>ATAFFQALNIATK Deamidated (N6)<br>VGAAPCDVVPAGNTGMEPK Carbamidomethyl (C7) Oxidation (M18)<br>VFLCLMNVN Carbamidomethyl (C4)                                                                  | 57.1<br>36.0<br>5.6<br>31.8                          |
| 148 | Tb927.4.2450   | thioredoxin, putative                                                                   | 1.00 | 381 | 16 | 7 | 5 | 14.8 | LALPVRPLPAHGLENFCSPDAR Carbamidomethyl (C19)<br>SAGAQSGAQLINAPGIK<br>SAGAQSGAQLINAPGIK Deamidated (Q6)<br>SAGAQSGAQLINAPGIK Deamidated (Q6) Deamidated (N14)<br>SAGAQSGAQLINAPGIKTVK<br>SRVRYVLSLSPR<br>VPPYAVLSLSPR                                                                                                     | 46.0<br>80.0<br>74.4<br>7.1<br>32.6<br>35.7<br>59.2                  | 1.00 | 64  | 3  | 1 | 1 | 4.6  | SAGAQSGAQLINAPGIK                                                                                                                                                                                             | 55.3                                                 |
| 149 | Tb927.4.4210   | ATP-dependent zinc metallopeptidase, putative, metallo-peptidase, Clan MA(E) Family M41 | 1.00 | 292 | 17 | 7 | 7 | 11.4 | ALINSYER<br>HLENEVLTDDVYR<br>MAMVYSSFAPRPVYAPGTGTR Oxidation (M1) Oxidation (M4)<br>SRVLSPPER<br>WKEHFRHLSGTASDSDNKKVNR<br>VPTGALLGPPGTGK<br>VPTGALLGPPGTGKTLAK                                                                                                                                                          | 37.1<br>9.6<br>45.4<br>29.8<br>43.7<br>56.2<br>17.4                  | 0.92 | 48  | 3  | 2 | 2 | 5.0  | TSAGIEKGEQEHMLNELLTQLDGFSSR<br>VPTGALLGPPGTGK                                                                                                                                                                 | 9.3<br>35.8                                          |
| 150 | Tb927.10.7500  | fibrillarin                                                                             | 1.00 | 238 | 12 | 5 | 4 | 21.0 | GGGGGGGAGAKVVEPHLHPGVFISK<br>ILALNAQFLK<br>LKPLEGASLEPPERDHAHVGVYR<br>LKPLEGASLEPPERDHAHVGVYR Deamidated (Q6)<br>VVVEPHLHPGVFISK                                                                                                                                                                                         | 27.3<br>37.2<br>43.9<br>33.6<br>42.9                                 | 1.00 | 160 | 6  | 3 | 2 | 13.3 | LKPLEGASLEPPERDHAHVGVYR<br>LKPLEGASLEPPERDHAHVGVYR Deamidated (Q6)<br>VVVEPHLHPGVFISK                                                                                                                         | 41.0<br>53.1<br>40.2                                 |
| 151 | Tb927.11.3490  | hypothetical protein, conserved                                                         | 1.00 | 287 | 17 | 6 | 6 | 9.2  | EADQVLLSSTPYR<br>SAKEADQVLLSSTPYR<br>HGGAPTQVDPDALAR<br>NVLEQLEVDKAVDR<br>QDASQFCETLR Carbamidomethyl (C7)<br>SIDERVNLQK                                                                                                                                                                                                 | 40.8<br>60.6<br>26.5<br>35.9<br>21.0<br>31.7                         | 1.00 | 141 | 6  | 2 | 2 | 4.4  | NLEQLEVDKAVDR<br>SVEKSEGLADTATEVYK                                                                                                                                                                            | 50.0<br>36.5                                         |
| 152 | Tb927.11.2670  | Nucleopoin                                                                              | 1.00 | 271 | 13 | 5 | 5 | 12.5 | AGLLEWLDNDPYYR<br>AGLLEWLDNDPYYRSGAPLTISEVLSLK<br>IAEKQTR<br>SSTAAGAAAAAR<br>VVRDGHANNFLQK                                                                                                                                                                                                                               | 15.4<br>70.0<br>31.9<br>74.0<br>40.6                                 | 1.00 | 125 | 3  | 3 | 2 | 5.7  | AGLLEWLDNDPYYR<br>AGLLEWLDNDPYYRSGAPLTISEVLSLK<br>AGLLEWLDNDPYYRSGAPLTISEVLSLK Deamidated (N10)                                                                                                               | 50.1<br>55.3<br>20.0                                 |
| 153 | Tb927.10.3650  | NADH-dependent fumarate reductase, putative                                             | 0.89 | 242 | 11 | 6 | 5 | 5.4  | ATSGINGWTR<br>ATSGINGWTR Deamidated (N6)<br>ELLSNSGLCGDEPTNJKLEHTPYR Carbamidomethyl (C10)<br>FVNELDLR<br>FVNELDLRSVSK<br>VLRFLPGALGR                                                                                                                                                                                    | 44.4<br>42.2<br>28.2<br>39.4<br>33.7<br>20.6                         | 1.00 | 200 | 8  | 5 | 5 | 4.6  | ATSGINGWTR Deamidated (N6)<br>FVNELDLR<br>FVNELDLR<br>SGDAIGWLSLGVPLSVLSQLGHSFKR                                                                                                                              | 32.7<br>42.4<br>29.5<br>29.3<br>34.1                 |
| 154 | Tb927.5.1300   | vacuolar proton translocating ATPase subunit A, putative                                | 0.48 | 31  | 2  | 1 | 1 | 2.7  | LGQLAAFQFDLNSDVSFAQR Deamidated (Q3) Deamidated (Q8)                                                                                                                                                                                                                                                                     | 24.6                                                                 | 1.00 | 361 | 18 | 7 | 5 | 12.1 | GNSVLHTDEITTFSEGEKER<br>ISEVNGASLYPVAESTER<br>ISEVNGASLYPVAESTER Deamidated (N5)<br>LGQLAAFQFDLNSDVSFAQR<br>LGQLAAFQFDLNSDVSFAQR Deamidated (Q8)<br>QSPQLNLTGVPK<br>YLHDEKGLTCTVSTEAIGR Carbamidomethyl (C13) | 42.7<br>50.4<br>62.7<br>47.8<br>46.6<br>38.6<br>19.8 |
| 155 | Tb927.3.4970   | hypothetical protein, conserved                                                         | 0.98 | 102 | 6  | 5 | 5 | 10.5 | AANKGSVMAAPGTDRR<br>EMRPTYPVDEWARDDAALAEQVLELKYVYR<br>ERSPTVMSKGGTQAGSGSPGSAVESDLQK Oxidation (M7)<br>SIAKVGGDLNVYAPK<br>VLALEKIVESR                                                                                                                                                                                     | 10.1<br>20.2<br>4.4<br>36.1<br>30.6                                  | 0.91 | 40  | 4  | 2 | 2 | 5.8  | EMRPTYPVDEWARDDAALAEQVLELKYVYR<br>ERSPTVMSKGGTQAGSGSPGSAVESDLQK Oxidation (M7)                                                                                                                                | 24.9<br>6.0                                          |
| 156 | Tb927.8.4810   | prohibitin 1                                                                            | 1.00 | 245 | 23 | 5 | 5 | 17.0 | AAVRAEAGEAESAR<br>AAVRAEAGEAESARLQIAQR<br>LISEAQR<br>NVTFLPGSNMLLHKM Oxidation (M11) Oxidation (M15)<br>SGGGLLELR                                                                                                                                                                                                        | 20.4<br>19.7<br>41.8<br>21.5<br>77.9                                 | 1.00 | 119 | 4  | 3 | 3 | 15.5 | AAVRAEAGEAESAR<br>ILQLEIKVFNIR<br>NVTFLPGSNMLLHKM Deamidated (N10)                                                                                                                                            | 18.0<br>61.4<br>29.8                                 |
| 157 | Tb927.10.3990  | DH41                                                                                    | 1.00 | 163 | 16 | 5 | 4 | 16.0 | ELQMGFEKGFERSPVQEEAIPVALQKQVLYR Deamidated (Q3) Oxidation (M4)<br>ELQMGFEKGFERSPVQEEAIPVALQKQVLYR Oxidation (M4)<br>GFERSPVQEEAIPVALQKQVLYR<br>NVLDEAKLLSSEFTSLMR<br>NVTFEYGLRR                                                                                                                                          | 13.8<br>33.7<br>43.4<br>12.0<br>23.7                                 | 1.00 | 237 | 14 | 6 | 4 | 20.7 | GFERSPVQEEAIPVALQKQVLYR<br>GFERSPVQEEAIPVALQKQVLYR Deamidated (Q18)<br>GFERSPVQEEAIPVALQKQVLYR Deamidated (Q9)<br>NVLDEAKLLSSEFTSLMR<br>NVTFEYGLRR<br>TASVPIVLEKVDQLGHALLMVPTR                                | 49.9<br>36.4<br>12.5<br>62.3<br>11.2<br>24.3         |

Peptides

|     |                |                                                                           |      |     |    |   |   |      |                                                                                                                                                                                                                                                                                              |                                                              |      |     |    |   |   |      |                                                                                                                                                                                                                                   |                                                      |
|-----|----------------|---------------------------------------------------------------------------|------|-----|----|---|---|------|----------------------------------------------------------------------------------------------------------------------------------------------------------------------------------------------------------------------------------------------------------------------------------------------|--------------------------------------------------------------|------|-----|----|---|---|------|-----------------------------------------------------------------------------------------------------------------------------------------------------------------------------------------------------------------------------------|------------------------------------------------------|
| 158 | Tb927.11.8260  | carbonic anhydrase-like protein                                           | 1.00 | 64  | 4  | 1 | 1 | 2.6  | AANFKLSQVLR                                                                                                                                                                                                                                                                                  | 59.2                                                         | 1.00 | 197 | 12 | 4 | 3 | 10.2 | AANFKLSQVLR<br>AANFKLSQVLR Deamidated (N4)<br>FVIMTQISK<br>GSVYYSGLTTPCTEGVR Carbamidomethyl (C18)                                                                                                                                | 56.8<br>56.0<br>39.6<br>26.6                         |
| 159 | Tb927.8.900    | splicing factor TGR1                                                      | 1.00 | 301 | 35 | 7 | 7 | 18.6 | LEQVAVPSVDR<br>RGECAFVDVPSAHAR Carbamidomethyl (C4)<br>RRGECAFVDVPSAHAR Carbamidomethyl (C5)<br>SISDRRLR<br>SKLEEAAPIGFR<br>SKLEEAAPIGFR<br>TALFVGLGPSGR                                                                                                                                     | 41.9<br>14.8<br>20.3<br>27.6<br>51.3<br>19.4<br>57.2         | 1.00 | 127 | 7  | 3 | 3 | 11.9 | LTEDMDKYGEAR Oxidation (M5)<br>SKLEEAAPIGFR<br>TALFVGLGPSGR                                                                                                                                                                       | 9.1<br>41.1<br>57.2                                  |
| 160 | Tb927.9.2900   | hypothetical protein, conserved                                           | 1.00 | 212 | 13 | 6 | 5 | 3.3  | HLVETVPGQR<br>IASGGSQHAALLMNR<br>LMAEMLPWALLETEDRDVVVEQAR Oxidation (M2) Oxidation (M5)<br>MGADALSLVGTGGYQR<br>MGADALSLVGTGGYQR Oxidation (M1)<br>VLSGAGAGETPSR                                                                                                                              | 39.5<br>8.2<br>29.3<br>29.7<br>19.3<br>67.6                  | 0.00 | 14  | 1  | 1 | 1 | 0.7  | MGADALSLVGTGGYQR                                                                                                                                                                                                                  | 14.1                                                 |
| 161 | Tb927.9.4210   | fatty acyl CoA synthetase 3                                               | 1.00 | 259 | 22 | 8 | 8 | 12.5 | AFDHAFQSR<br>ALAYRPVDRVEK<br>ALGVAVPVPGETSDCSPIYR Carbamidomethyl (C17)<br>ATASFQETAR<br>GDIAEYNSLLIGVPR<br>RVIDERYDIAPLFVEEC Carbamidomethyl (C19)<br>VAVPVPGETSDCSPIYR Carbamidomethyl (C13)<br>VDERYDIAPLFVEEC Carbamidomethyl (C18)                                                      | 39.5<br>20.6<br>26.6<br>13.5<br>17.5<br>18.1<br>46.2<br>33.5 | 1.00 | 214 | 13 | 6 | 5 | 11.5 | ALAYRPVDRVEK<br>ATASFQETAR<br>IASGGSPLSTATQDFWVVLAR<br>IALSSGSPSTATQDFWVVLAR Deamidated (G14)<br>VAVPVPGETSDCSPIYR Carbamidomethyl (C13)<br>VDERYDIAPLFVEEC Carbamidomethyl (C18)                                                 | 20.5<br>25.1<br>53.6<br>33.6<br>30.1<br>11.7         |
| 162 | Tb927.3.1120   | GTP-binding nuclear protein rib2, putative                                | 1.00 | 211 | 18 | 4 | 3 | 31.8 | KLANDPRLTVEAPMLDPNVQPLTAEQLQALQEQEAR Deamidated (N7) Oxidation (M15)<br>KLANDPRLTVEAPMLDPNVQPLTAEQLQALQEQEAR Oxidation (M15)<br>SNYNFEKFLWLAK<br>VCDNIPVLVGNVDCAEER Carbamidomethyl (C2) Carbamidomethyl (C16)                                                                               | 55.4<br>59.8<br>22.8<br>36.3                                 | 1.00 | 57  | 2  | 1 | 1 | 8.8  | VCDNIPVLVGNVDCAEER Carbamidomethyl (C2) Carbamidomethyl (C16)                                                                                                                                                                     | 39.2                                                 |
| 163 | Tb927.5.3230   | hypothetical protein, conserved                                           | 1.00 | 218 | 20 | 4 | 4 | 4.2  | AALIEACNVSMDEPELLR Carbamidomethyl (C7) Oxidation (M1)<br>ALTQCLSTYELIAPQVLDKNVPAIQASR Carbamidomethyl (C5)<br>SLAAWASGELSOTAACLK<br>VLFQLLTSDHWAHETRPVVER Carbamidomethyl (C10)                                                                                                             | 32.3<br>31.7<br>50.5<br>35.7                                 | 0.00 | 12  | 1  | 1 | 1 | 0.8  | STSMALGFTVPASSAR Oxidation (M4)                                                                                                                                                                                                   | 12.3                                                 |
| 164 | Tb927.11.1270  | hypothetical protein, conserved                                           | 1.00 | 240 | 10 | 4 | 3 | 17.2 | ATLPASQQAIFY<br>LLSTGKIEEYLPNNK<br>LLSTGKIEEYLPNNKATLPASQQAIFY<br>LLSTGKIEEYLPNNKATLPASQQAIFY Deamidated (N28)                                                                                                                                                                               | 44.7<br>64.5<br>55.0<br>62.3                                 | 0.00 | 0   | 0  | 0 | 0 | 0.0  |                                                                                                                                                                                                                                   |                                                      |
| 165 | Tb927.2.3780   | translation initiation factor IF-2, putative                              | 1.00 | 104 | 10 | 5 | 5 | 9.2  | AAVFPVQLTLDANHTDRILPK<br>AAVFPVQLTLDANHTDRILPKVK<br>AKEHVLESVTK<br>MAAAGFVDPVEKVR<br>SPKCVLGHVDTGKTLSDLR Carbamidomethyl (C4) Carbamidomethyl (C5)                                                                                                                                           | 17.5<br>35.3<br>12.7<br>6.3<br>18.6                          | 1.00 | 268 | 21 | 7 | 6 | 13.0 | AAVFPVQLTLDANHTDRILPK<br>AAVFPVQLTLDANHTDRILPKVK<br>AKEHVLESVTK<br>IAANILEYVPGSHLLVRRPQDKEAWK<br>IAANILEYVPGSHLLVRRPQDKEAWK Deamidated (N4)<br>LFDKLETTEDNLLATLK<br>SPKCVLGHVDTGKTLSDLR Carbamidomethyl (C4) Carbamidomethyl (C5) | 32.0<br>39.3<br>30.9<br>33.0<br>35.9<br>41.7<br>15.3 |
| 166 | Tb927.11.13900 | par1                                                                      | 1.00 | 239 | 18 | 6 | 6 | 15.7 | AATPPVHRLQVHGVK<br>ALEKYER<br>AAWALIEAETAATAENYSGYVDSR<br>AWEEGETELARDIPVGRA<br>AVVGGDVEVER<br>KAELVQLTAK                                                                                                                                                                                    | 39.2<br>40.0<br>35.1<br>20.1<br>32.4<br>35.6                 | 1.00 | 97  | 8  | 3 | 2 | 7.9  | AAWALIEAETAATAENYSGYVDSR<br>AAWALIEAETAATAENYSGYVDSR Deamidated (N18)<br>AWEEGETELARDIPVGRA                                                                                                                                       | 48.7<br>14.0<br>17.6                                 |
| 167 | Tb927.11.4480  | radial spoke protein RSP4/6, putative                                     | 1.00 | 280 | 14 | 6 | 6 | 20.2 | HSVVDGESTACNEPCVPPSELSE Carbamidomethyl (C12) Carbamidomethyl (C16)<br>LAENERLFRAPPEIQTIEQDPYTTITTR<br>LFRAPPEIQTIEQDPYTTITTR<br>LSFVYVSNWAGDNTLLPVTQDQACGR Carbamidomethyl (C25)<br>PVNPEFQDLFAFAR Oxidation (M12)<br>SLEVPVQPEPFGVGNR                                                      | 38.3<br>31.2<br>49.9<br>66.7<br>14.5<br>43.8                 | 0.00 | 4   | 1  | 1 | 1 | 2.9  | SLEVPVQPEPFGVGNR Deamidated (Q7)                                                                                                                                                                                                  | 3.6                                                  |
| 168 | Tb927.5.1470   | NADH-cytochrome b5 reductase, putative                                    | 1.00 | 210 | 10 | 6 | 6 | 32.3 | IKDNGSEITYYVPTPNTK<br>ILVAGPPELKEIAGEK<br>ILVAGPPELKEIAGEKFNEMAPPEQGLPK Oxidation (M23)<br>LSAGYEPDTR<br>SYGVALKSGDAPMYR Oxidation (M4) Oxidation (M14)<br>VLGGIEINEEMR Oxidation (M12)                                                                                                      | 40.5<br>24.5<br>29.6<br>60.0<br>34.5<br>8.3                  | 1.00 | 124 | 8  | 4 | 4 | 22.1 | IKDNGSEITYYVPTPNTK<br>ILVAGPPELKEIAGEK<br>ILVAGPPELKEIAGEKFNEMAPPEQGLPK<br>LSAGYEPDTR                                                                                                                                             | 7.3<br>10.8<br>24.5<br>55.3                          |
| 169 | Tb927.6.1890   | cytochrome c1, heme protein, mitochondrial precursor                      | 1.00 | 185 | 6  | 4 | 3 | 28.7 | AAQFANNSEPPDLQHSVFGK Deamidated (N6)<br>AAQFANNSEPPDLQHSVFGK Deamidated (N7)<br>QIYTEVAPCHLGR Carbamidomethyl (C10)<br>QLASZYEVDSAPDAGMLNRPKGFDTLPIFFNQR Oxidation (M18)                                                                                                                     | 55.4<br>25.2<br>36.2<br>55.9                                 | 1.00 | 167 | 7  | 3 | 1 | 8.1  | AAQFANNSEPPDLQHSVFGK Deamidated (N6)<br>AAQFANNSEPPDLQHSVFGK Deamidated (N6) Deamidated (N7)<br>AAQFANNSEPPDLQHSVFGK Deamidated (N7)                                                                                              | 66.0<br>36.9<br>46.5                                 |
| 170 | Tb927.11.2410  | hypothetical protein, conserved                                           | 1.00 | 221 | 14 | 5 | 4 | 23.0 | FKVVPSSST<br>LYNNAVALR<br>LYNNAVALR Deamidated (N3)<br>QLASLRFVFGSALPK<br>YAACSAVAGQMATELAK Carbamidomethyl (C4) Oxidation (M12)                                                                                                                                                             | 37.6<br>50.9<br>44.4<br>23.9<br>39.8                         | 1.00 | 150 | 8  | 5 | 5 | 27.9 | EAGRPKIQGQEK<br>FKVVPSSST<br>KTLNAEIKGLASLRFVFGSALPK Deamidated (N4)<br>TLNAEIKGLASLRFVFGSALPK<br>YAACSAVAGQMATELAK Carbamidomethyl (C4)                                                                                          | 33.3<br>14.2<br>34.1<br>28.2<br>28.2                 |
| 171 | Tb927.11.14730 | metalloprotease, putative, cell division protein Flh1 homologue, putative | 1.00 | 333 | 22 | 8 | 7 | 13.2 | AVAGEANAPFLSCSGADFIFFGGSGPK Carbamidomethyl (C13)<br>AVAGEANAPFLSCSGADFIFFGGSGPK Carbamidomethyl (C13)<br>EAAPCVIIDEIDAGSR Carbamidomethyl (C5)<br>EAAPCVIIDEIDAGSRNSGSR Carbamidomethyl (C5)<br>ITGDACPKQQR Carbamidomethyl (C3)<br>VASLTAEEAPEVK<br>VRELFAGAR<br>VRELFAGAR Deamidated (Q7) | 39.3<br>55.7<br>41.6<br>24.3<br>13.8<br>27.7<br>33.6<br>34.7 | 1.00 | 201 | 16 | 5 | 4 | 9.0  | AVAGEANAPFLSCSGADFIFFGGSGPK Carbamidomethyl (C13)<br>AVAGEANAPFLSCSGADFIFFGGSGPK Carbamidomethyl (C13)<br>EAAPCVIIDEIDAGSR Carbamidomethyl (C5)<br>EAAPCVIIDEIDAGSR Carbamidomethyl (C5)<br>VASLTAEEAPEVK                         | 21.5<br>41.4<br>10.3<br>46.9<br>25.1                 |
| 172 | Tb927.6.4090   | chaperonin HSP60, mitochondrial precursor, putative                       | 1.00 | 295 | 17 | 5 | 3 | 7.6  | NALAEVAGGGAALLHASK<br>NALAEVAGGGAALLHASK Deamidated (N1)<br>NVIKQPSGEK<br>VIDAANAARNALAEVAGGGAALLHASK<br>VIDAANAARNALAEVAGGGAALLHASK Deamidated (N10)                                                                                                                                        | 71.9<br>5.7<br>28.1<br>67.2<br>35.4                          | 1.00 | 285 | 13 | 5 | 4 | 9.6  | NALAEVAGGGAALLHASK<br>NVIKQPSGEK<br>TSLVNRNAR Deamidated (N8)<br>VIDAANAARNALAEVAGGGAALLHASK<br>VIDAANAARNALAEVAGGGAALLHASK Deamidated (N10)                                                                                      | 72.4<br>37.2<br>29.5<br>54.8<br>36.5                 |
| 173 | Tb927.3.3490   | high mobility group protein, putative                                     | 1.00 | 150 | 9  | 4 | 4 | 15.9 | AGAAWKELGPEER<br>AGAAWKELGPEER<br>ANNPQGNNTALQTLGK<br>HSDLSVEMSK Oxidation (M9)                                                                                                                                                                                                              | 53.8<br>34.5<br>10.7<br>28.5                                 | 1.00 | 49  | 3  | 1 | 1 | 5.2  | AGAAWKELGPEER                                                                                                                                                                                                                     | 35.8                                                 |
| 174 | Tb927.1.4310   | hypothetical protein, conserved                                           | 1.00 | 334 | 18 | 7 | 6 | 7.3  | DAPNAAGSPYNR<br>ELVYSQAPISYTPR<br>LLSSQKPPALEALDEADYPTAFVDRVYVYDGEWR<br>LLSSQKPPALEALDEADYPTAFVDRVYVYDGEWR Deamidated (Q6)<br>NLEVTCIARRLPK Carbamidomethyl (C6)<br>GQIPQALHALFAESVSR<br>SFVADAVQSEIDLUSDEMAR Oxidation (M19)                                                                | 64.0<br>30.9<br>41.4<br>42.3<br>21.0<br>20.5<br>19.8         | 1.00 | 116 | 2  | 2 | 1 | 2.1  | LLSSQKPPALEALDEADYPTAFVDRVYVYDGEWR<br>LLSSQKPPALEALDEADYPTAFVDRVYVYDGEWR Deamidated (Q6)                                                                                                                                          | 67.6<br>48.2                                         |
| 175 | Tb927.7.1790   | Adenine phosphoribosyltransferase, putative                               | 1.00 | 257 | 22 | 5 | 5 | 36.5 | EAEELQEFNYSYTR<br>GYIGAPLAWLGPVYAR<br>RFPSSVPEGDDLKYLPMRSR Oxidation (M18)<br>SIRNDSIPPR                                                                                                                                                                                                     | 48.0<br>65.7<br>27.6<br>22.5                                 | 1.00 | 142 | 8  | 2 | 2 | 15.2 | EAEELQEFNYSYTR<br>GYIGAPLAWLGPVYAR                                                                                                                                                                                                | 68.7<br>54.4                                         |



Peptides

| Accession | Protein Name                    | Start                                                                        | End  | Score | Modifications | Peptide | Score | Modifications | Peptide                                                                                                                                                                                                                                     | Score                                                        |      |     |    |   |   |      |                                                                                                                                                                                  |                                                             |
|-----------|---------------------------------|------------------------------------------------------------------------------|------|-------|---------------|---------|-------|---------------|---------------------------------------------------------------------------------------------------------------------------------------------------------------------------------------------------------------------------------------------|--------------------------------------------------------------|------|-----|----|---|---|------|----------------------------------------------------------------------------------------------------------------------------------------------------------------------------------|-------------------------------------------------------------|
| 198       | Tb927.8.4780                    | hypothetical protein, conserved                                              | 1.00 | 199   | 17            | 6       | 6     | 2.4           | ACNPFLLYEDRW Carbamidomethyl (C2)<br>AVIEERKAEESLAAYPFLLGR<br>ALVTGLAEENATKTDVHKQYVFLPK<br>KAEESLAAYPFLLGR<br>RNMIGRLGELPNDAMFSQLGOR Oxidation (M3)- Oxidation (M7)<br>TSSDSESFAGLPGAR                                                      | 24.3<br>17.0<br>20.3<br>47.3<br>29.7<br>21.4                 | 0.00 | 8   | 1  | 1 | 1 | 0.6  | ALVTGLAEENATKTDVHKQYVFLPK                                                                                                                                                        | 8.4                                                         |
| 199       | Tb927.3.3460                    | hypothetical protein, conserved                                              | 1.00 | 233   | 10            | 5       | 4     | 14.9          | GNPVGAAEDIKLPEISDALKR<br>GNPVGAAEDIKLPEISDALKR Deamidated (N2)<br>VDEAKGIVGEGYSTK<br>TGAKGLAGNASVLGK<br>TSVPHQPFVAGEDELRR                                                                                                                   | 65.3<br>63.2<br>39.9<br>26.8<br>28.0                         | 0.36 | 33  | 6  | 2 | 2 | 8.5  | GNPVGAAEDIKLPEISDALKR<br>TSVPHQPFVAGEDELRR                                                                                                                                       | 7.3<br>20.6                                                 |
| 200       | Tb927.11.9080                   | hypothetical protein, conserved                                              | 1.00 | 199   | 9             | 4       | 3     | 3.5           | LKLGTPQK<br>STALQEOGAGATTVAPEPR<br>STALQEOGAGATTVAPEPR Deamidated (Q7)<br>VKPDAATALEVVR                                                                                                                                                     | 22.9<br>46.0<br>2.3<br>75.3                                  | 0.00 | 7   | 1  | 1 | 1 | 1.6  | STALQEOGAGATTVAPEPR                                                                                                                                                              | 6.5                                                         |
| 201       | Tb927.11.14130<br>Tb927.10.3840 | ribosomal protein L18, putative<br>60S ribosomal protein L18a, putative      | 0.96 | 294   | 17            | 8       | 6     | 39.7          | AGAVSDANNLQASR<br>ARYHNIEVLGK<br>ETPSEKNPQPTVYKFEVAFNIVAK<br>ETPSEKNPQPTVYKFEVAFNIVAK Deamidated (N7)<br>LNWAGFHPNLSFLLQOR<br>LNWAGFHPNLSFLLQOR Deamidated (N10)<br>LNWAGFHPNLSFLLQOR<br>YHNEVLGK                                           | 81.2<br>19.6<br>29.4<br>29.9<br>29.2<br>17.3<br>17.9<br>41.6 | 0.00 | 0   | 0  | 0 | 0 | 0.0  |                                                                                                                                                                                  |                                                             |
| 202       | Tb927.10.4880                   | hypothetical protein, conserved                                              | 1.00 | 151   | 13            | 3       | 3     | 11.2          | KSPFMKLDQALPVYDDVVTGSGR Oxidation (M5)- Oxidation (M9)<br>LMDGALPVYDDVVTGSGR Oxidation (M2)<br>SPFMKLDQALPVYDDVVTGSGR Oxidation (M4)- Oxidation (M8)                                                                                        | 33.4<br>77.6<br>25.6                                         | 0.99 | 56  | 2  | 2 | 1 | 8.0  | LMDGALPVYDDVVTGSGR Oxidation (M2)<br>LMDGALPVYDDVVTGSGR Oxidation (M2)- Deamidated (D4)                                                                                          | 44.2<br>11.6                                                |
| 203       | Tb927.9.11220                   | hypothetical protein, conserved                                              | 1.00 | 195   | 13            | 6       | 5     | 17.1          | AVNQFYSEELAK<br>AVNQFYSEELAKR<br>AVNQFYSEELAKR Deamidated (Q4)<br>SPFEVDWTAGEAR<br>SVPAFSLAHVAK<br>VVDTTGSEVLVFLQTVAPR                                                                                                                      | 23.3<br>46.7<br>39.8<br>6.7<br>40.6<br>7.4                   | 1.00 | 132 | 10 | 3 | 3 | 14.0 | LAAFPDIIEFLANK<br>SVPAFSLAHVAK<br>VVDTTGSEVLVFLQTVAPR                                                                                                                            | 49.6<br>34.2<br>18.9                                        |
| 204       | Tb927.8.3870                    | hypothetical protein, conserved                                              | 1.00 | 181   | 15            | 4       | 4     | 4.4           | LYNNGETSVHTDEENERLYK<br>PVTVEEVLR<br>SLSHYGESEELR<br>VEAVDSYRR                                                                                                                                                                              | 10.9<br>72.0<br>43.1<br>22.2                                 | 1.00 | 91  | 2  | 2 | 2 | 1.6  | PVTVEEVLR<br>VEAVDSYRR                                                                                                                                                           | 71.4<br>20.0                                                |
| 205       | Tb927.2.5160                    | chaperone protein DNAJ, putative                                             | 1.00 | 148   | 8             | 3       | 3     | 15.5          | ILQYPKGEERPAEATEHTLAVTVLDREAR<br>SIGRFVQMGVACPR Oxidation (M10)- Carbamidomethyl (C14)<br>STNVDPQKLWVSR                                                                                                                                     | 38.3<br>61.6<br>20.3                                         | 0.00 | 0   | 0  | 0 | 0 | 0.0  |                                                                                                                                                                                  |                                                             |
| 206       | Tb927.10.240                    | peroxin 14, putative                                                         | 1.00 | 177   | 14            | 7       | 7     | 23.2          | AELSLTGLKR<br>EVPALPVPVASESHVDAK<br>HTSLLYAPQAPLPEAAATR<br>LRGQVAVSR<br>RHTSLLYAPQAPLPEAAATR<br>SLVHREVPALPVPVASESHVDAK<br>TNEKESQIKSLQEEVNR                                                                                                | 16.8<br>14.6<br>34.0<br>15.5<br>25.9<br>6.6<br>30.8          | 1.00 | 136 | 8  | 4 | 3 | 12.8 | EVPALPVPVASESHVDAK<br>HTSLLYAPQAPLPEAAATR<br>HTSLLYAPQAPLPEAAATR Deamidated (Q9)<br>SLVHREVPALPVPVASESHVDAK                                                                      | 24.1<br>34.1<br>23.1<br>39.8                                |
| 207       | Tb927.10.8230                   | protein disulfide isomerase bloodstream-specific protein 2 precursor         | 1.00 | 337   | 20            | 7       | 7     | 18.7          | AVNQPWTPASNAEEVTR<br>GYPTILFRNKGAEHVGAR Deamidated (N10)<br>LFPGRFRETIVYR<br>SLVPEVETVDGKTTWAK<br>TKDQIKYK<br>VSLKFFEAEPK<br>VSLKFFEAEPKLPDQKPTIVYR                                                                                         | 50.0<br>35.2<br>28.8<br>27.8<br>55.1<br>43.6<br>37.7         | 1.00 | 73  | 5  | 2 | 2 | 6.0  | SLVPEVETVDGKTTWAK<br>VSLKFFEAEPK                                                                                                                                                 | 24.2<br>33.3                                                |
| 208       | Tb927.6.4210                    | aldehyde dehydrogenase, putative                                             | 1.00 | 254   | 15            | 5       | 4     | 15.6          | AKHADQLVTGMTNVDFGNLYLCSLPGGK Oxidation (M12)- Carbamidomethyl (C24)<br>ASTTDRPQVK<br>EINWRSPTQVTPR<br>SAAQTLTPVLELGGKDPVAVCDDADLEHVPIIMR Carbamidomethyl (C22)<br>SAAQTLTPVLELGGKDPVAVCDDADLEHVPIIMR Carbamidomethyl (C22)- Oxidation (M35) | 50.8<br>31.4<br>38.1<br>54.0<br>46.0                         | 1.00 | 215 | 9  | 5 | 4 | 11.4 | ASTTDRPQVK<br>EINWRSPTQVTPR<br>LTLTLGKR<br>SAAQTLTPVLELGGKDPVAVCDDADLEHVPIIMR Carbamidomethyl (C22)<br>SAAQTLTPVLELGGKDPVAVCDDADLEHVPIIMR Carbamidomethyl (C22)- Oxidation (M35) | 35.4<br>32.2<br>43.7<br>58.3<br>16.6                        |
| 209       | Tb927.6.3150                    | Hydin flagellar component                                                    | 1.00 | 218   | 19            | 8       | 8     | 3.2           | ALLSVYSPFLYKEDKGNLFLPLPSGEGR<br>ALGNVITLSPVSGTVR<br>GAVPVASPLVEASR<br>GRLLPESFAVSRPVK<br>KAAVAKPTAEVAPPPADTIQMLPTVGSSTVTR Oxidation (M23)<br>KVVGAWEAPVYR<br>VVVVGPCCSK Carbamidomethyl (C9)<br>VVVVGPCCSKTGTQK Carbamidomethyl (C9)        | 8.7<br>36.0<br>24.5<br>6.4<br>24.9<br>30.9<br>26.7<br>20.2   | 0.00 | 0   | 0  | 0 | 0 | 0.0  |                                                                                                                                                                                  |                                                             |
| 210       | Tb927.10.7090                   | alternative oxidase                                                          | 0.75 | 40    | 2             | 2       | 2     | 7.3           | RLQNSVNPVVLK<br>TRTFGSEGAK                                                                                                                                                                                                                  | 30.2<br>9.7                                                  | 1.00 | 262 | 17 | 8 | 5 | 15.5 | LQNSVNPVVLK<br>LRPTNDREAVR<br>LSFLETVPVPLR<br>NATFRLNVR<br>NATFRLNVR Deamidated (N1)<br>NATFRLNVR Deamidated (N6)<br>RLQNSVNPVVLK<br>RLQNSVNPVVLK Deamidated (N4)                | 6.4<br>32.5<br>25.9<br>28.2<br>33.0<br>33.1<br>32.5<br>32.0 |
| 211       | Tb927.11.1710                   | mitochondrial RNA binding protein 1_gBFP21, MRP1                             | 1.00 | 210   | 14            | 5       | 5     | 30.6          | AAEGGEKAAATSAEGGAR<br>KVDPNLSPQFDADRR<br>LLLSQYPLQVPR<br>SISGTSRPH<br>VAVDGLLLISQYPLQVPR Deamidated (Q15)                                                                                                                                   | 47.3<br>21.5<br>71.7<br>27.1<br>1.1                          | 0.00 | 0   | 0  | 0 | 0 | 0.0  |                                                                                                                                                                                  |                                                             |
| 212       | Tb927.3.1810                    | hypothetical protein, conserved                                              | 1.00 | 63    | 5             | 2       | 2     | 15.6          | LNTVLYQVNEVSPFTELGPVEEVRV<br>SSSSPSPFEAPASSLPKDDINAR                                                                                                                                                                                        | 37.5<br>10.8                                                 | 1.00 | 178 | 5  | 4 | 2 | 17.5 | LNTVLYQVNEVSPFTELGPVEEVRV<br>LNTVLYQVNEVSPFTELGPVEEVRV Deamidated (Q6)- Deamidated (N10)<br>STEGEEAVNLLLEEVQALLSRVPIGSLFR<br>STEGEEAVNLLLEEVQALLSRVPIGSLFR Deamidated (N10)      | 35.0<br>34.2<br>44.0<br>49.5                                |
| 213       | Tb927.9.9450                    | hypothetical protein, conserved, zinc finger protein family member, putative | 1.00 | 190   | 33            | 4       | 3     | 4.6           | AAKRALQVQPR<br>AKPNEAASPYQQQTRPTTSAR<br>AKPNEAASPYQQQTRPTTSAR Deamidated (N4)<br>RSEVQPTVEAKLPR                                                                                                                                             | 41.0<br>23.8<br>18.4<br>45.7                                 | 0.77 | 64  | 5  | 3 | 3 | 4.3  | AAKRALQVQPR<br>AKPNEAASPYQQQTRPTTSAR<br>RSEVQPTVEAK                                                                                                                              | 27.5<br>17.2<br>12.8                                        |
| 214       | Tb927.11.8160                   | dynein heavy chain, putative                                                 | 1.00 | 120   | 10            | 5       | 4     | 1.5           | AVNTVISAAGLNKR<br>AVNTVISAAGLNKR Deamidated (N3)<br>AVNTVISAAGLNKRNPNEDLELLLR<br>LIAGLGGKVR<br>TKSDPSVPIGDFDAERER                                                                                                                           | 35.8<br>20.0<br>9.2<br>18.9<br>14.6                          | 0.00 | 14  | 1  | 1 | 1 | 0.4  | TWPLLDIPGGOANSWIR                                                                                                                                                                | 13.8                                                        |
| 215       | Tb927.4.3590                    | translation elongation factor 1-beta, putative                               | 1.00 | 124   | 8             | 4       | 4     | 31.4          | DGLLWGDHKLVPVAFGK<br>ITPPVAAPVAAPAAAPAAATPAK                                                                                                                                                                                                | 6.0<br>22.4                                                  | 0.75 | 121 | 7  | 3 | 3 | 28.0 | DGLLWGDHKLVPVAFGK<br>ITPPVAAPVAAPAAAPAAATPAK                                                                                                                                     | 28.7<br>17.5                                                |

Peptides

| Protein ID | Protein Name   | Accession                                                                                                    | Length | Start | End | Modifications | Score | Identified | Protein Name                                                                                                                                                                                                                                                                | Accession                                    | Length | Start | End | Modifications | Score | Identified |                                                                                                                                       |                              |
|------------|----------------|--------------------------------------------------------------------------------------------------------------|--------|-------|-----|---------------|-------|------------|-----------------------------------------------------------------------------------------------------------------------------------------------------------------------------------------------------------------------------------------------------------------------------|----------------------------------------------|--------|-------|-----|---------------|-------|------------|---------------------------------------------------------------------------------------------------------------------------------------|------------------------------|
| 216        | Tb927.9.2450   | electron transport protein SCO1/SCO2, putative                                                               | 1.00   | 149   | 4   | 3             | 2     | 11.5       | LFLGGVKKPSEEDVAFNDLLGGDNTNFR<br>TAWGAPKTFPWAAPAAAPAAAPAAATRAKK                                                                                                                                                                                                              | 40.5<br>43.5                                 | 1.00   | 88    | 4   | 3             | 3     | 16.4       | LFLGGVKKPSEEDVAFNDLLGGDNTNFR                                                                                                          | 55.1                         |
| 217        | Tb927.3.2440   | serine/threonine protein kinase, putative                                                                    | 1.00   | 168   | 6   | 4             | 2     | 9.4        | ILGLVGTQEEVESVAR<br>ILGLVGTQEEVESVAR Deamidated (G8)<br>VANVATMLDENVASVQKPSSEI Oxidation (M7)                                                                                                                                                                               | 64.8<br>18.4<br>58.6                         | 1.00   | 88    | 4   | 3             | 3     | 16.4       | EAGASDNDGQAANIK<br>ILGLVGTQEEVESVAR<br>VANVATMLDENVASVQKPSSEI Deamidated (C16)                                                        | 5.1<br>42.9<br>35.7          |
| 218        | Tb927.9.4190   | fatty acyl CoA synthetase 1                                                                                  | 1.00   | 131   | 7   | 4             | 4     | 9.6        | LDLKKFKPFTVGVPR<br>LGEVPSVGGLLKGEVGR<br>QKFGPLAHCQPAIGENCSPYVR Carbamidomethyl (C10); Carbamidomethyl (C18)<br>TLTDDTARRP                                                                                                                                                   | 37.8<br>42.9<br>28.3<br>15.3                 | 1.00   | 165   | 13  | 4             | 4     | 9.0        | GDLEKFKPFTVGVPR<br>LGEVPSVGGLLK<br>TLTDDTARRP<br>VVFGLPLGGYQLTETCCNGSQR Deamidated (G9); Carbamidomethyl (C17); Carbamidomethyl (C18) | 35.5<br>31.5<br>19.5<br>49.3 |
| 219        | Tb927.4.4070   | mevalonate kinase, putative                                                                                  | 1.00   | 167   | 7   | 4             | 4     | 17.3       | ALNELYSNLSEEAIVNR<br>HLNDSKDGLLVK<br>LTVSCPELDAATCCR Carbamidomethyl (C5); Carbamidomethyl (C14); Carbamidomethyl (C15)<br>YVVGPSGSK                                                                                                                                        | 66.1<br>45.8<br>11.0<br>31.2                 | 1.00   | 203   | 9   | 4             | 3     | 16.4       | ALNELYSNLSEEAIVNR<br>ALNELYSNLSEEAIVNR Deamidated (N8)<br>HLNDSKDGLLVK<br>LGGVPSGSGGASASDVLSLR                                        | 50.9<br>43.1<br>37.7<br>33.6 |
| 220        | Tb927.10.2630  | adenylate kinase, putative                                                                                   | 1.00   | 223   | 14  | 6             | 5     | 32.0       | GLDDVTSPELQRPDRKEVVEK<br>MKVFLGPRQCGKGTGSPFVAK Oxidation (M1); Carbamidomethyl (C11)<br>SVMVDVGLVSDDDVFGVKEKQKPR Oxidation (M3)<br>SVMVDVGLVSDDDVFGVKEKQKPR Oxidation (M3); Deamidated (Q24)<br>VFLGPRGCGK Carbamidomethyl (C9)<br>VFLGPRGCGKGTGSPFVAK Carbamidomethyl (C9) | 23.2<br>22.9<br>45.1<br>50.3<br>20.2<br>21.8 | 0.00   | 0     | 0   | 0             | 0     | 0.0        |                                                                                                                                       |                              |
| 221        | Tb927.5.500    | hypothetical protein, conserved                                                                              | 1.00   | 239   | 12  | 5             | 5     | 7.1        | ASLAECNAVESTREPSGVPAGPDEAEAAKR Carbamidomethyl (C6)<br>NVTYSALDDEFRETNVQK<br>RVMVSVSFDTLR<br>VQLGTATPTDAEEGEEKVGPATLSPAPYEATR<br>VQLGTATPTDAEEGEEKVGPATLSPAPYEATRAER                                                                                                        | 67.0<br>15.1<br>28.5<br>28.5<br>54.9         | 0.32   | 42    | 2   | 2             | 2     | 2.2        | NVTYSALDDEFRETNVQK<br>RVMVSVSFDTLR                                                                                                    | 18.6<br>23.6                 |
| 222        | Tb927.2.3800   | mRNA processing protein, putative                                                                            | 1.00   | 171   | 4   | 3             | 2     | 11.6       | AFQLLHSETATDVGIASIDPRLPGQSK<br>NTVWGLWNEGNLFSLVPELAFLOEHR Carbamidomethyl (C28)<br>NTVWGLWNEGNLFSLVPELAFLOEHR Deamidated (Q25); Carbamidomethyl (C28)                                                                                                                       | 62.8<br>59.3<br>43.3                         | 1.00   | 61    | 3   | 1             | 1     | 5.7        | AFQLLHSETATDVGIASIDPRLPGQSK                                                                                                           | 46.2                         |
| 223        | Tb927.7.2170   | hypothetical protein, conserved                                                                              | 1.00   | 177   | 12  | 5             | 5     | 2.6        | ALFQQLVAR<br>ALLOMCLR Oxidation (M5); Carbamidomethyl (C6)<br>LVDQVDQR Carbamidomethyl (C7)<br>NCVIEALESSSTR Carbamidomethyl (C2)<br>RALFQQLVAR                                                                                                                             | 49.7<br>28.9<br>15.5<br>14.0<br>41.7         | 0.00   | 0     | 0   | 0             | 0     | 0.0        |                                                                                                                                       |                              |
| 224        | Tb927.8.1990   | peroxidase                                                                                                   | 1.00   | 188   | 12  | 4             | 4     | 16.4       | ALFVDDKGLR<br>ALFVDDKGLRHVTINDLPVGR<br>HVTINDLPVGR<br>TATVREAPEFAGK                                                                                                                                                                                                         | 57.9<br>30.5<br>39.6<br>34.1                 | 0.25   | 22    | 1   | 1             | 1     | 5.3        | ALFVDDKGLR                                                                                                                            | 21.5                         |
| 225        | Tb927.10.12840 | mitochondrial carrier protein, putative; mitochondrial 2-oxoglutarate/malate carrier protein, putative       | 1.00   | 153   | 13  | 4             | 4     | 16.5       | AALVGAQWVHDQVLSALR<br>GPFRLGSLTLR<br>LGGCPFR Carbamidomethyl (C3)<br>YKSVTQIGR                                                                                                                                                                                              | 26.5<br>28.2<br>30.2<br>29.9                 | 1.00   | 233   | 23  | 4             | 3     | 16.5       | AALVGAQWVHDQVLSALR<br>AALVGAQWVHDQVLSALR Deamidated (G8)<br>VIREGALVYVSPYFFR<br>YKSVTQIGR                                             | 50.1<br>36.1<br>29.9<br>23.6 |
| 226        | Tb927.7.2390   | hypothetical protein, conserved                                                                              | 1.00   | 114   | 3   | 3             | 2     | 4.1        | AALVTFDSISAPLTSNGSNIPR<br>AALVTFDSISAPLTSNGSNIPR Deamidated (N17)<br>LPPVSAALKTHPFMK Oxidation (M14)                                                                                                                                                                        | 49.3<br>46.5<br>17.7                         | 0.00   | 5     | 1   | 1             | 1     | 1.6        | LPPVSAALKTHPFMK Oxidation (M14)                                                                                                       | 4.7                          |
| 227        | Tb927.4.1330   | DNA topoisomerase II, large subunit                                                                          | 1.00   | 262   | 30  | 5             | 5     | 7.9        | AVATYFDKLLR<br>ILPEDVVLNIGK<br>ILPEDVVLNIGKEAPVAPAGHKWK<br>VPTALTGSASSTK<br>VPTALTGSASSTNK                                                                                                                                                                                  | 59.6<br>28.3<br>24.0<br>48.1<br>39.9         | 1.00   | 101   | 6   | 3             | 3     | 4.2        | AVATYFDKLLR<br>VPTALTGSASSTK<br>VPTALTGSASSTNK                                                                                        | 51.2<br>23.4<br>17.1         |
| 228        | Tb927.11.12230 | heat shock protein Hsc70, ATPase subunit Hsc70, putative; ATP-dependent hsc70 ATPase subunit Hsc70, putative | 1.00   | 99    | 2   | 2             | 2     | 5.4        | LVDETQSAALR<br>VTKRWANAGNGAR                                                                                                                                                                                                                                                | 61.3<br>38.0                                 | 0.77   | 32    | 1   | 1             | 1     | 3.6        | KASILDSYVGGAEGRK                                                                                                                      | 32.0                         |
| 229        | Tb927.8.3690   | isocitrate dehydrogenase [NADP], mitochondrial precursor, putative                                           | 1.00   | 197   | 10  | 4             | 4     | 11.2       | DASNDKYTEGAAEAQR<br>NILGCTVREPIVVK<br>NILGCTVREPIVVKR<br>VVPQWSEPIVGR                                                                                                                                                                                                       | 38.7<br>49.0<br>50.2<br>29.1                 | 0.00   | 10    | 1   | 1             | 1     | 3.0        | VVPQWSEPIVGR                                                                                                                          | 10.1                         |
| 230        | Tb927.11.15040 | chaperonin HSP60, mitochondrial precursor, putative; heat shock protein 60                                   | 1.00   | 229   | 22  | 5             | 5     | 10.8       | HEFENSFENLGNLVR<br>ITKDGVTYAK<br>KLLLLGVENLVK<br>NVLLEMPVASFQ Oxidation (M6)<br>SVSTGTNPMDLKR Oxidation (M9)                                                                                                                                                                | 32.5<br>27.8<br>56.3<br>34.4<br>28.3         | 1.00   | 145   | 7   | 4             | 4     | 8.8        | HEFENSFENLGNLVR<br>ITKDGVTYAK<br>KLLLLGVENLVK<br>SVSTGTNPMDLKR Oxidation (M9)                                                         | 28.7<br>30.3<br>67.0<br>12.8 |
| 231        | Tb927.6.3050   | aldehyde dehydrogenase family, putative                                                                      | 1.00   | 118   | 7   | 4             | 4     | 10.7       | EKPLALYFSNNKR<br>SLNLVEENTDEFCK Carbamidomethyl (C14)<br>VAEIVMAAAK Oxidation (M8)<br>VLNLSLKPASAEVAGVGR Deamidated (N3)                                                                                                                                                    | 18.1<br>47.0<br>34.8<br>12.2                 | 1.00   | 52    | 3   | 1             | 1     | 2.8        | SLNLVEENTDEFCK Carbamidomethyl (C14)                                                                                                  | 46.7                         |
| 232        | Tb927.8.5120   | cytochrome c                                                                                                 | 0.99   | 183   | 8   | 6             | 5     | 53.5       | AAQCHTGTGGSSNGVGNLYGIVGR Deamidated (G3); Carbamidomethyl (C4)<br>AAQCHTGTGGSSNGVGNLYGIVGR Carbamidomethyl (C4); Deamidated (N13)<br>AAQCHTGTGGSSNGVGNLYGIVGR Deamidated (G3); Carbamidomethyl (C4)<br>ADLWLETLD<br>MSFAGLKKPQER Oxidation (M1)<br>SGTVEGFTYSK              | 35.9<br>34.2<br>33.3<br>22.5<br>20.6<br>27.2 | 0.00   | 0     | 0   | 0             | 0     | 0.0        |                                                                                                                                       |                              |
| 233        | Tb927.6.1500   | alkyl-dihydroxyacetone phosphate synthase                                                                    | 1.00   | 145   | 12  | 5             | 5     | 12.9       | HNVVPFGGGTNTGGVEPNPFETR<br>IKPTPLTKEEAK<br>LLSPSPSEKETPK<br>LLSPSPSEKETPKATDAR<br>CRNSMFDKMGKPSGALQHL Oxidation (M5); Oxidation (M6); Oxidation (M10)                                                                                                                       | 23.7<br>20.5<br>21.1<br>20.8<br>26.6         | 0.86   | 53    | 3   | 2             | 2     | 6.7        | HNVVPFGGGTNTGGVEPNPFETR<br>IKPTPLTKEEAK                                                                                               | 31.9<br>20.3                 |
| 234        | Tb927.2.5660   | adenylate kinase, putative                                                                                   | 1.00   | 113   | 5   | 3             | 2     | 18.1       | GPLQIFAGVAGSQR<br>GIPQIFAGVAGSQR Deamidated (G6)<br>NAQQQAQVEEGVQVFLLDLPEDLSFR Carbamidomethyl (C11)                                                                                                                                                                        | 49.1<br>39.1<br>20.2                         | 0.00   | 12    | 1   | 1             | 1     | 11.5       | NAQQQAQVEEGVQVFLLDLPEDLSFR Carbamidomethyl (C11)                                                                                      | 11.7                         |
| 235        | Tb927.10.5770  | valosin-containing protein homolog; Transitional endoplasmic reticulum ATPase, putative                      | 1.00   | 184   | 9   | 4             | 4     | 9.7        | AAAPCVLFFDELDSVAR Carbamidomethyl (C5)<br>KISPLAPVDLQDLAAATHGFGADLAGICQR Carbamidomethyl (C29)<br>KYELFATSLQGR                                                                                                                                                              | 42.5<br>34.4<br>57.1<br>37.1                 | 1.00   | 53    | 4   | 1             | 1     | 2.2        | AAAPCVLFFDELDSVAR Carbamidomethyl (C5)                                                                                                | 40.2                         |
| 236        | Tb927.11.5290  | mitochondrial carrier protein, putative                                                                      | 1.00   | 146   | 9   | 3             | 3     | 14.2       | AFRANAAACFAAR Carbamidomethyl (C8)<br>DKTKSTLNLGGM Carbamidomethyl (C11); Oxidation (M13)<br>VQASPVPLTPVAFR                                                                                                                                                                 | 59.8<br>6.2<br>54.4                          | 0.88   | 39    | 2   | 2             | 2     | 9.6        | VQASPVPLTPVAFR<br>VRQGTALSSGAR                                                                                                        | 33.5<br>5.7                  |
| 237        | Tb927.9.5690   | 60S acidic ribosomal protein, putative                                                                       | 1.00   | 114   | 6   | 3             | 3     | 58.4       | MSVSWAAAPAGGAAAPAGGAAAGAAAPAK Oxidation (M1)<br>SVNTLAEQWAK Deamidated (N3)<br>YLAATALASLAKPAPTADDK                                                                                                                                                                         | 27.0<br>31.2<br>16.9                         | 0.00   | 13    | 2   | 1             | 1     | 29.2       | MSVSWAAAPAGGAAAPAGGAAAGAAAPAK Oxidation (M1)                                                                                          | 10.9                         |
| 238        | Tb927.11.6140  | 40S ribosomal protein S19A, putative                                                                         | 1.00   | 124   | 6   | 2             | 2     | 16.9       | NTGGKLVGFY<br>TMMSVLANLR Oxidation (M2); Oxidation (M3)                                                                                                                                                                                                                     | 53.9<br>52.3                                 | 0.00   | 0     | 0   | 0             | 0     | 0.0        |                                                                                                                                       |                              |

Peptides

|     |                |                                                                                         |      |     |    |   |   |      |                                                                                                                                                                                                                                                                          |                                      |      |     |    |   |   |      |                                                                                                                                                                                                                    |                                              |
|-----|----------------|-----------------------------------------------------------------------------------------|------|-----|----|---|---|------|--------------------------------------------------------------------------------------------------------------------------------------------------------------------------------------------------------------------------------------------------------------------------|--------------------------------------|------|-----|----|---|---|------|--------------------------------------------------------------------------------------------------------------------------------------------------------------------------------------------------------------------|----------------------------------------------|
| 239 | Tb927.11.600   | hypothetical protein, conserved                                                         | 1.00 | 173 | 10 | 4 | 3 | 41.5 | ATTPGQLEGVPAELQQLAEFTK<br>QQAIDSKLMQGGVR Deamidated (G2); Oxidation (M10)<br>QQAIDSKLMQGGVR Oxidation (M10)<br>QQNVERQAQDLSKLMQGGVR Oxidation (M16)                                                                                                                      | 25.7<br>44.2<br>28.9<br>45.0         | 0.00 | 4   | 1  | 1 | 1 | 21.7 | ATTPGQLEGVPAELQQLAEFTK                                                                                                                                                                                             | 4.3                                          |
| 240 | Tb927.2.5800   | sedoheptulose-1,7-bisphosphatase                                                        | 1.00 | 240 | 19 | 5 | 5 | 20.8 | AGVPCDVVGVETVAGACR Carbamidomethyl (C5); Carbamidomethyl (C18)<br>AAAGLRNDGVTAAK<br>KAGVPCDVVGVETVAGACR Carbamidomethyl (C5); Carbamidomethyl (C19)<br>LFEAPRAMELHLKAGGGR Oxidation (M8); Carbamidomethyl (C14)<br>VYSMEGTPHALGACR Oxidation (M4); Carbamidomethyl (C14) | 46.3<br>45.7<br>36.7<br>26.4<br>37.4 | 1.00 | 165 | 7  | 4 | 4 | 19.3 | AGVPCDVVGVETVAGACR Carbamidomethyl (C5); Carbamidomethyl (C18)<br>AAAGLRNDGVTAAK<br>GNLTSDSLITDLR<br>VYSMEGTPHALGACR Oxidation (M4); Carbamidomethyl (C14)                                                         | 54.3<br>33.7<br>43.5<br>13.3                 |
| 241 | Tb927.4.2060   | hypothetical protein, conserved                                                         | 1.00 | 203 | 11 | 4 | 4 | 5.5  | DKRLGELNDQLFALR<br>KQSLVNLGNISR Deamidated (N8)<br>LLLGNESLQGR<br>VAWAGNPGTR                                                                                                                                                                                             | 12.9<br>60.8<br>38.3<br>58.6         | 1.00 | 197 | 8  | 5 | 5 | 8.6  | DKRLGELNDQLFALR<br>GNSQHLGQALLKEDIAELEELKQLAEER<br>KQSLVNLGNISR Deamidated (N8)<br>LLLGNESLQGR Deamidated (G4)<br>VAWAGNPGTR                                                                                       | 32.4<br>29.7<br>36.5<br>35.3<br>45.5         |
| 242 | Tb927.10.8780  | hypothetical protein, conserved                                                         | 1.00 | 114 | 6  | 3 | 2 | 2.1  | QNTLVPVLVHALDNLPLSGFDLFSKXVPR Deamidated (N2)<br>QNTLVPVLVHALDNLPLSGFDLFSKXVPR Deamidated (G1); Deamidated (N2)<br>WVGQVTHIEPFSK Carbamidomethyl (C4)                                                                                                                    | 35.0<br>41.5<br>17.0                 | 0.00 | 0   | 0  | 0 | 0 | 0.0  |                                                                                                                                                                                                                    |                                              |
| 243 | Tb927.10.15750 | hypothetical protein, conserved                                                         | 1.00 | 184 | 13 | 4 | 3 | 2.4  | LFEGLMLDLARDEQGR<br>LFEGLMLDLARDEQGR Oxidation (M6)<br>VALESTAVETTSR<br>VEVATWDEQQLR                                                                                                                                                                                     | 23.5<br>38.7<br>69.1<br>25.5         | 0.23 | 22  | 1  | 1 | 1 | 0.6  | QNTTEEKKEAK Deamidated (N2)                                                                                                                                                                                        | 21.8                                         |
| 244 | Tb927.9.4500   | heat shock protein, putative, HSP70-like protein                                        | 1.00 | 91  | 5  | 2 | 2 | 3.7  | AQFEAEACELFNEAVR Carbamidomethyl (C7)<br>SGLNDVESLLHYK                                                                                                                                                                                                                   | 63.8<br>11.2                         | 0.99 | 56  | 3  | 2 | 2 | 4.1  | FPQSGICGSLAGLVSK Carbamidomethyl (C7)<br>SGLNDVESLLHYK                                                                                                                                                             | 44.2<br>8.2                                  |
| 245 | Tb927.9.4680   | ATP-dependent DEAD box helicase, putative                                               | 1.00 | 102 | 11 | 3 | 3 | 10.9 | GGDIAAQSQTGK<br>GYSHGFEKPSIQGR<br>LQSGTVAWGTGPR                                                                                                                                                                                                                          | 34.3<br>41.4<br>9.3                  | 0.99 | 80  | 8  | 3 | 2 | 7.4  | GYSHGFEKPSIQGR<br>GYSHGFEKPSIQGR Deamidated (G15)<br>LQSGTVAWGTGPR                                                                                                                                                 | 30.2<br>34.8<br>6.1                          |
| 246 | Tb927.4.870    | dynein heavy chain, putative                                                            | 1.00 | 153 | 13 | 4 | 4 | 2.1  | FVAEDELFLKGLGDLFPGLDTPAQQENLNR<br>LLPTSSLLFEVGDLYASPATYSR<br>QLAACDDEQDLTAGLR Carbamidomethyl (C5)<br>SITELKSFAPFASVAVVVR                                                                                                                                                | 25.5<br>40.1<br>47.1<br>18.4         | 0.97 | 42  | 2  | 1 | 1 | 0.5  | LLPTSSLLFEVGDLYASPATYSR                                                                                                                                                                                            | 35.5                                         |
| 247 | Tb927.10.5780  | adenylate kinase, putative                                                              | 1.00 | 199 | 14 | 5 | 5 | 27.4 | GILLDGPR<br>GLHLLFGAPGQSK Carbamidomethyl (C12)<br>GLHLLFGAPGQSKGTASERLVR Carbamidomethyl (C12)<br>IYNLKSDFSPQEMGR Oxidation (M14)<br>SWATKVDLELR                                                                                                                        | 7.2<br>56.4<br>29.9<br>29.5<br>40.8  | 0.00 | 10  | 1  | 1 | 1 | 7.4  | IYNLKSDFSPQEMGR Oxidation (M14)                                                                                                                                                                                    | 9.9                                          |
| 248 | Tb927.10.13180 | hypothetical protein, conserved                                                         | 1.00 | 127 | 6  | 4 | 4 | 4.4  | GAICAQLSK Carbamidomethyl (C4)<br>IYSELVEREPAAHVVR<br>SISWITTSIAPR<br>VHNVMKDAVAAAR Oxidation (M5)                                                                                                                                                                       | 17.5<br>27.5<br>64.6<br>15.9         | 0.00 | 21  | 1  | 1 | 1 | 1.4  | IYSELVEREPAAHVVR                                                                                                                                                                                                   | 21.2                                         |
| 249 | Tb927.11.14780 | phosphomannose isomerase, putative                                                      | 1.00 | 128 | 10 | 4 | 4 | 16.6 | LKLDGQVGHYAWGKEAAESYAK Carbamidomethyl (C6)<br>WQDVPTLLR<br>YGTQDLGR<br>YRAPEGSEVELQHYSPREFQDFSLYR                                                                                                                                                                       | 33.4<br>30.7<br>29.2<br>18.4         | 0.91 | 58  | 3  | 2 | 2 | 12.5 | LKLDGQVGHYAWGKEAAESYAK Carbamidomethyl (C6)<br>YRAPEGSEVELQHYSPREFQDFSLYR                                                                                                                                          | 23.8<br>25.0                                 |
| 250 | Tb927.2.2940   | hypothetical protein, conserved                                                         | 1.00 | 119 | 9  | 2 | 2 | 16.1 | ISEGAALFLPHADLQCGSPVSLLR Carbamidomethyl (C19)<br>LGLLLVQLGAAKENQIFGR                                                                                                                                                                                                    | 25.5<br>53.0                         | 1.00 | 148 | 9  | 4 | 2 | 16.1 | ISEGAALFLPHADLQCGSPVSLLR Carbamidomethyl (C19)<br>LGLLLVQLGAAKENQIFGR<br>LGLLLVQLGAAKENQIFGR Deamidated (N14)<br>LGLLLVQLGAAKENQIFGR Deamidated (G7)                                                               | 30.9<br>56.8<br>41.0<br>3.2                  |
| 251 | Tb927.10.10360 | microtubule-associated protein, putative                                                | 0.89 | 170 | 43 | 4 | 4 | 1.2  | DVLRREEEVTGPR<br>HVDPSHFR<br>STTAESYAPIDPAAYK<br>STTAESYAPIDPAAYK                                                                                                                                                                                                        | 26.2<br>21.6<br>36.6<br>31.1         | 1.00 | 163 | 17 | 4 | 4 | 1.9  | DVLRREEEVTGPR<br>HVDPSHFLTTHAYKPIDPSEYR<br>HVDPSHFR<br>STTAESYAPIDPAAYK                                                                                                                                            | 38.4<br>41.9<br>19.2<br>30.8                 |
| 252 | Tb927.4.1360   | hypothetical protein, conserved                                                         | 1.00 | 190 | 15 | 5 | 5 | 27.3 | QIPRGGVVPVFPQGNMGPLPHFGAR Oxidation (M18)<br>LVLVPSRM Oxidation (M9)<br>NDDGSSILHLGGALTNWR<br>NKEGTELLYSSK<br>VLAGPQFEWK                                                                                                                                                 | 20.1<br>28.1<br>49.6<br>41.7<br>12.6 | 0.00 | 0   | 0  | 0 | 0 | 0.0  |                                                                                                                                                                                                                    |                                              |
| 253 | Tb927.11.15150 | 1-acyl-sn-glycerol-3-phosphate acyltransferase, putative                                | 1.00 | 98  | 8  | 3 | 3 | 10.7 | AGLETVKGTVAPMEEAR Oxidation (M13); Oxidation (M14)<br>KAGLETVKGTVAPMEEAR Oxidation (M14); Oxidation (M15)<br>MLAVFPEGAR Oxidation (M1)                                                                                                                                   | 24.5<br>8.8<br>45.0                  | 0.00 | 7   | 1  | 1 | 1 | 7.0  | KAGLETVKGTVAPMEEAR Oxidation (M14); Oxidation (M15)                                                                                                                                                                | 7.5                                          |
| 254 | Tb927.10.8200  | hypothetical protein, conserved                                                         | 0.78 | 50  | 4  | 2 | 2 | 9.3  | CAGLPFCHTFQIPR Carbamidomethyl (C1); Carbamidomethyl (C8)<br>VIDSNKLSVK                                                                                                                                                                                                  | 23.4<br>19.2                         | 1.00 | 195 | 5  | 4 | 3 | 20.8 | CAGLPFCHTFQIPR Carbamidomethyl (C1); Carbamidomethyl (C8)<br>EAGHSEVSDTLEDFATAPQK<br>SFLTQLNDPQGVTHEMLR<br>SFLTQLNDPQGVTHEMLR Deamidated (N8)                                                                      | 25.8<br>74.6<br>59.7<br>29.9                 |
| 255 | Tb927.7.4900   | 5'-3' exonuclease XRNA, putative, exonuclease 1, putative                               | 1.00 | 188 | 11 | 4 | 4 | 5.9  | ACGAAPFATGTVYR Carbamidomethyl (C2)<br>SIEEFIESCGISQSVLAAQDAPFREHYR Carbamidomethyl (C9)<br>SVTTTAAFGSGTFSVPLR<br>VFKVPVSIHVLVDYASSR Deamidated (G3)                                                                                                                     | 40.2<br>47.9<br>30.3<br>27.8         | 1.00 | 111 | 3  | 3 | 3 | 3.2  | ACGAAPFATGTVYR Carbamidomethyl (C2)<br>SVTTTAAFGSGTFSVPLR<br>TLAAVETVQDR                                                                                                                                           | 11.1<br>19.1<br>80.7                         |
| 256 | Tb927.9.5960   | succinate dehydrogenase, putative                                                       | 1.00 | 221 | 17 | 5 | 5 | 33.5 | AAAPKPTVFTAK<br>AAAPKPTVFTAKDNSK<br>PMAAPLPEWAK<br>TAFHVYTORGFATPTVYGR<br>VGPLEDKASKY                                                                                                                                                                                    | 31.9<br>29.5<br>44.3<br>29.4<br>45.5 | 0.83 | 32  | 1  | 1 | 1 | 7.5  | VGPLEDKASKY                                                                                                                                                                                                        | 32.2                                         |
| 257 | Tb927.11.9400  | hypothetical protein, conserved                                                         | 1.00 | 142 | 7  | 4 | 2 | 5.3  | LAQLLISGDKLEELTVGROELDELGGTLK Carbamidomethyl (C8)<br>LAQLLISGDKLEELTVGROELDELGGTLK Carbamidomethyl (C8); Deamidated (N8)<br>LAQLLISGDKLEELTVGROELDELGGTLK Deamidated (G3); Deamidated (N9); Carbamidomethyl (C8)<br>VLAIQDGSNSR                                         | 46.5<br>20.2<br>41.3<br>24.7         | 1.00 | 170 | 5  | 3 | 1 | 3.8  | LAQLLISGDKLEELTVGROELDELGGTLK Carbamidomethyl (C8)<br>LAQLLISGDKLEELTVGROELDELGGTLK Carbamidomethyl (C8); Deamidated (N9)<br>LAQLLISGDKLEELTVGROELDELGGTLK Carbamidomethyl (C8); Deamidated (G21); Deamidated (N9) | 68.4<br>47.3<br>38.2                         |
| 258 | Tb927.7.210    | proline dehydrogenase                                                                   | 0.79 | 32  | 2  | 1 | 1 | 3.1  | TVVSEAVLALDPTPVQK                                                                                                                                                                                                                                                        | 31.4                                 | 1.00 | 232 | 13 | 6 | 5 | 16.4 | RKTVSEAVLALDPTPVQK<br>IIDKLPK<br>LASSQKTEDEINAVLQVLPDNEGKTYNYK<br>LASSQKTEDEINAVLQVLPDNEGKTYNYK Deamidated (G17); Deamidated (N22)<br>RAEAFGPFLTYNTLVK<br>YVPYGPVKEVHLYGR                                          | 42.1<br>32.3<br>29.4<br>30.8<br>18.1<br>31.1 |
| 259 | Tb927.11.8870  | mitochondrial DEAD box protein, KRE11                                                   | 1.00 | 109 | 10 | 3 | 2 | 6.0  | GLDFPDVTCVNLIAPK Carbamidomethyl (C9)<br>IYVLAFTRELVDQTA<br>IYVLAFTRELVDQTA Deamidated (G12)                                                                                                                                                                             | 10.4<br>27.3<br>38.6                 | 0.00 | 14  | 1  | 1 | 1 | 3.1  | GLDFPDVTCVNLIAPK Carbamidomethyl (C9)                                                                                                                                                                              | 14.1                                         |
| 260 | Tb927.11.1980  | hypothetical protein, conserved, zinc finger protein family member, putative            | 1.00 | 66  | 4  | 2 | 2 | 7.7  | LVYDVTDEPLTGEDADPPSNWHEQKPK<br>TQAPASINPFR                                                                                                                                                                                                                               | 31.6<br>23.3                         | 1.00 | 115 | 4  | 2 | 2 | 9.1  | LVYDVTDEPLTGEDADPPSNWHEQKPK<br>NPFEELEEGNKDAVK                                                                                                                                                                     | 34.5<br>63.8                                 |
| 261 | Tb927.4.4910   | 3,2-trans-enoil-CoA isomerase, mitochondrial precursor, putative                        | 1.00 | 117 | 9  | 4 | 4 | 12.8 | FLSVPOQSR<br>KLNEMTKLGIITPRVWVAVYVLSGR<br>LITSRIGITVLSR<br>LGIITPRVWVAVYVLSGR                                                                                                                                                                                            | 30.7<br>31.0<br>23.2<br>13.4         | 0.87 | 35  | 4  | 1 | 1 | 5.0  | LGIITPRVWVAVYVLSGR                                                                                                                                                                                                 | 14.2                                         |
| 262 | Tb927.10.16150 | ATP-dependent zinc metallopeptidase, putative, metallo-peptidase, Clan MA(E) Family M41 | 0.62 | 80  | 1  | 1 | 1 | 3.0  | GCLLTGQRTGKTLAK Carbamidomethyl (C2)                                                                                                                                                                                                                                     | 80.5                                 | 1.00 | 99  | 4  | 2 | 2 | 3.1  | KVAPSVVFLDEIDAVGTR                                                                                                                                                                                                 | 24.4                                         |

Peptides

|     |                |                                                                                    |      |     |    |   |   |      |                                                                                                                                                   |                                              |      |     |    |   |   |      |                                                                                                                                                                                          |                                              |
|-----|----------------|------------------------------------------------------------------------------------|------|-----|----|---|---|------|---------------------------------------------------------------------------------------------------------------------------------------------------|----------------------------------------------|------|-----|----|---|---|------|------------------------------------------------------------------------------------------------------------------------------------------------------------------------------------------|----------------------------------------------|
| 263 | Tb927.11.8050  | hypothetical protein, conserved                                                    | 1.00 | 91  | 4  | 2 | 2 | 8.8  | TPEFNTQSVAPVIEAVERDYAALTSSER<br>TVQPEEGGFVGPLLK                                                                                                   | 29.0<br>41.2                                 | 1.00 | 158 | 8  | 5 | 3 | 12.2 | VAPSVFLDEIDAVGTR<br>AAASVLGVHEDEQDFAK<br>TPEFNTQSVAPVIEAVERDYAALTSSER<br>TPEFNTQSVAPVIEAVERDYAALTSSER Deamidated (N5)<br>TPEFNTQSVAPVIEAVERDYAALTSSER Deamidated (C8)<br>TVQPEEGGFVGPLLK | 51.7<br>16.8<br>41.1<br>44.1<br>31.3<br>11.6 |
| 264 | Tb927.10.2950  | hypothetical protein, conserved                                                    | 1.00 | 103 | 4  | 2 | 2 | 1.5  | IGKSNVETTAAGTAAGSR<br>VAGLIGQR                                                                                                                    | 62.7<br>23.1                                 | 0.00 | 7   | 2  | 1 | 1 | 1.0  | IGKSNVETTAAGTAAGSR                                                                                                                                                                       | 7.0                                          |
| 265 | Tb927.8.1550   | parafagellar rod component, putative                                               | 1.00 | 186 | 11 | 5 | 5 | 10.3 | DMAAEELLAQQQYFSR<br>LSSTVIGDQR<br>RPVATTVPHSGVLSKPLPPVEALR<br>SVHVDRLQTLQR<br>TVGINHEEAFLEK                                                       | 3.2<br>80.2<br>30.8<br>12.3<br>33.5          | 1.00 | 60  | 4  | 2 | 2 | 5.3  | RGEVEPLGHVSYNR<br>RPVATTVPHSGVLSKPLPPVEALR                                                                                                                                               | 14.4<br>36.5                                 |
| 266 | Tb927.5.4420   | nucleolar RNA helicase II, putative, nucleolar RNA helicase Gu, putative           | 1.00 | 135 | 9  | 3 | 3 | 7.6  | GLDLPMVDLVCQAPPTDIDAFHR Oxidation (M6)- Carbamidomethyl (C13)<br>GSATVQLGQR Oxidation (M7)<br>SLPHTVFCSLR Carbamidomethyl (C8)                    | 32.1<br>39.1<br>34.8                         | 0.59 | 29  | 1  | 1 | 1 | 2.5  | IKFEVLPAPTRREELK                                                                                                                                                                         | 28.8                                         |
| 267 | Tb927.10.770   | hypothetical protein, conserved                                                    | 1.00 | 202 | 8  | 4 | 3 | 5.2  | INLGPHEELFAELSSIR<br>INLGPHEELFAELSSIR Deamidated (N2)<br>ISSGAAQPTIDELKK<br>ISSGAAQPTIDELKINLGPHEELFAELSSIR                                      | 58.8<br>57.9<br>40.8<br>18.6                 | 1.00 | 117 | 5  | 2 | 1 | 2.9  | INLGPHEELFAELSSIR<br>INLGPHEELFAELSSIR Deamidated (N2)                                                                                                                                   | 60.1<br>45.0                                 |
| 268 | Tb927.11.3360  | hypothetical protein, conserved                                                    | 1.00 | 99  | 3  | 2 | 2 | 1.8  | AATVLSQAVQALTR<br>AATVLSQAVQALTRK Deamidated (Q6)                                                                                                 | 65.1<br>19.2                                 | 1.00 | 60  | 2  | 2 | 2 | 1.8  | AATVLSQAVQALTR<br>AATVLSQAVQALTRK Deamidated (Q6)                                                                                                                                        | 54.8<br>5.7                                  |
| 269 | Tb927.6.4980   | 40S ribosomal protein S14                                                          | 1.00 | 226 | 19 | 6 | 6 | 29.2 | AGMKIGREDVTPPTDSTR Oxidation (M3)<br>ATGGVTKSPGQGAALR<br>IGRIEDVTPPTDSTR<br>IGRIEDVTPPTDSTR<br>MRATGGVTKSPGQGAALR Oxidation (M1)<br>SPGPGGAALR    | 33.8<br>51.8<br>34.5<br>15.4<br>25.5<br>20.5 | 0.00 | 4   | 1  | 1 | 1 | 14.6 | MRATGGVTKSPGQGAALR Oxidation (M1)                                                                                                                                                        | 3.6                                          |
| 270 | Tb927.10.10280 | microtubule-associated protein, putative                                           | 1.00 | 209 | 51 | 5 | 5 | 2.2  | DVLRREEEATGPR<br>DVLREEEIVTGR<br>HVDPSHR<br>STTAESVAPIDPAAVK<br>STTAESVAPIDPAAVK                                                                  | 21.3<br>26.2<br>21.6<br>36.6<br>31.1         | 0.67 | 112 | 13 | 3 | 3 | 1.6  | DVLRREEEIVTGR<br>HVDPSHR<br>STTAESVAPIDPAAVK                                                                                                                                             | 38.4<br>19.2<br>30.8                         |
| 271 | Tb927.3.1840   | 3-oxo-5-alpha-steroid 4-dehydrogenase, putative                                    | 1.00 | 186 | 12 | 5 | 5 | 29.9 | ALTEGGVKDSEVYKDLGPOVGYR<br>MKVTVSGSSSEVELPSNAGLTDLKK Oxidation (M1)<br>NKKMLPFL Oxidation (M5)<br>NKYKTSVY<br>SGGDKNDKSAVTLDAK                    | 32.7<br>23.6<br>25.6<br>33.9<br>48.1         | 0.00 | 18  | 1  | 1 | 1 | 9.1  | MKVTVSGSSSEVELPSNAGLTDLKK Oxidation (M1)                                                                                                                                                 | 18.0                                         |
| 272 | Tb927.11.4450  | hypothetical protein, conserved                                                    | 1.00 | 114 | 5  | 3 | 3 | 43.6 | AISDAWAEILKQGLDVK<br>LSGGKPEVTSALGK<br>SKDFDTYAEQQKR                                                                                              | 34.0<br>11.1<br>42.5                         | 0.00 | 0   | 0  | 0 | 0 | 0.0  |                                                                                                                                                                                          |                                              |
| 273 | Tb927.7.3370   | hypothetical protein, conserved                                                    | 1.00 | 102 | 7  | 4 | 3 | 8.7  | ATRDEAFNVDLWLSHQHOR<br>ITELTTEIERLNEGEELVKGSSVLTQLQQR<br>ITELTTEIERLNEGEELVKGSSVLTQLQQR Deamidated (N12)<br>LNEGEELVKGSSVLTQLQQR                  | 9.4<br>39.7<br>36.4<br>10.0                  | 0.00 | 0   | 0  | 0 | 0 | 0.0  |                                                                                                                                                                                          |                                              |
| 274 | Tb927.8.4400   | hypothetical protein, conserved                                                    | 1.00 | 189 | 19 | 5 | 3 | 7.9  | ILAEVQHTDLAEQVSLYKPEVVPR<br>ILAEVQHTDLAEQVSLYKPEVVPR Deamidated (Q15)<br>ILAEVQHTDLAEQVSLYKPEVVPR Deamidated (Q7)<br>TKIENVTLQLLGAK<br>TRLPSAAAGR | 30.0<br>16.3<br>42.3<br>35.9<br>23.3         | 1.00 | 64  | 2  | 1 | 1 | 4.0  | ILAEVQHTDLAEQVSLYKPEVVPR                                                                                                                                                                 | 56.6                                         |
| 275 | Tb927.11.10760 | kinesin-like protein, putative                                                     | 1.00 | 144 | 4  | 4 | 4 | 9.6  | AEKEFESVHOKEGTR<br>FTDELAAPKR<br>ILAFUNASPEER<br>VYSLYGNVGLLEGGLPR                                                                                | 35.5<br>71.7<br>8.5<br>28.0                  | 0.97 | 62  | 3  | 2 | 2 | 4.1  | FTDELAAPKR<br>TLTLDATNEFLPR                                                                                                                                                              | 25.6<br>32.0                                 |
| 276 | Tb927.10.9780  | ATP-dependent DEAD(H) RNA helicase, putative, ATP-dependent RNA helicase, putative | 1.00 | 87  | 6  | 2 | 2 | 7.1  | FTHTPTVQEEVPSVLSQNVGDR<br>TLFAFAPILQHLVNLVNEVTGDPGKIGNEETANAAK                                                                                    | 35.2<br>26.2                                 | 0.69 | 30  | 1  | 1 | 1 | 4.1  | ELALQISEAMQQLVHAPVGVGCVGMAPEKQQR Carbamidomethyl (C24)                                                                                                                                   | 30.0                                         |
| 277 | Tb927.11.16510 | hypothetical protein, conserved                                                    | 1.00 | 170 | 15 | 4 | 4 | 29.5 | APPKASLPAR<br>HHYAGPSPGSEK<br>HHYAGPSPGSEKLTTE<br>WASDKYAEEMVLLSR Oxidation (M10)                                                                 | 27.0<br>41.5<br>38.7<br>33.6                 | 0.00 | 0   | 0  | 0 | 0 | 0.0  |                                                                                                                                                                                          |                                              |
| 278 | Tb927.11.17000 | hypothetical protein, conserved, leucine-rich repeat protein (LRP), putative       | 1.00 | 134 | 11 | 4 | 3 | 4.9  | EVPVTEEFVDTQVR<br>IVQVPHGDDGETTR<br>IVQVPHGDDGETTR Deamidated (Q3)<br>LVPDDESRNLTGVPVR                                                            | 50.4<br>29.0<br>11.2<br>20.1                 | 1.00 | 108 | 6  | 2 | 2 | 3.1  | EVPVTEEFVDTQVR<br>IVQVPHGDDGETTR                                                                                                                                                         | 44.1<br>33.7                                 |
| 279 | Tb927.9.15360  | 40S ribosomal protein S6, putative                                                 | 1.00 | 156 | 9  | 3 | 2 | 9.6  | MKLNIAVPR Oxidation (M1)<br>NGTVQGFVADEVLR<br>NGTVQGFVADEVLR Deamidated (N1)                                                                      | 41.0<br>41.8<br>44.1                         | 0.00 | 0   | 0  | 0 | 0 | 0.0  |                                                                                                                                                                                          |                                              |
| 280 | Tb927.10.170   | pseudouridine synthase, Clf5p                                                      | 1.00 | 136 | 11 | 4 | 4 | 9.6  | RVLPCVYLLTNYKR Carbamidomethyl (C6)<br>RWGLGPVAVK<br>VILGCEVLLTNYKR Carbamidomethyl (C5)<br>VVWQDSANAVCYGAK Carbamidomethyl (C12)                 | 37.5<br>37.7<br>27.7<br>10.2                 | 0.81 | 30  | 1  | 1 | 1 | 3.5  | RVLPCVYLLTNYKR Carbamidomethyl (C6)                                                                                                                                                      | 30.4                                         |
| 281 | Tb927.3.5570   | syntaxin, putative                                                                 | 1.00 | 134 | 5  | 3 | 2 | 6.9  | NAVGHLOQAR<br>NAVGHLOQAR Deamidated (N1)<br>SCDVFYKK Carbamidomethyl (C2)                                                                         | 44.1<br>51.1<br>31.2                         | 1.00 | 77  | 2  | 2 | 1 | 3.9  | NAVGHLOQAR<br>NAVGHLOQAR Deamidated (N1)                                                                                                                                                 | 30.3<br>46.3                                 |
| 282 | Tb927.10.6630  | ATP-dependent DEAD(H) RNA helicase HEL64, putative                                 | 1.00 | 177 | 10 | 4 | 4 | 10.6 | AGAWGDAFTLTK<br>EAQTPSVLKEIGLER<br>IKPVWGNVSLVPGNWK<br>LCLVATDVAAR Carbamidomethyl (C2)                                                           | 20.5<br>32.0<br>29.2<br>65.3                 | 1.00 | 127 | 9  | 3 | 3 | 8.6  | AGAWGDAFTLTK<br>EAQTPSVLKEIGLER<br>IKPVWGNVSLVPGNWK                                                                                                                                      | 13.7<br>53.6<br>43.2                         |
| 283 | Tb927.8.2740   | mitochondrial RNA binding protein                                                  | 1.00 | 150 | 6  | 3 | 2 | 12.4 | FLIFNVEQLEDPEVALR<br>TLDRSPVSPITFLLSGEPMOHEGVK Oxidation (M19)<br>TLDRSPVSPITFLLSGEPMOHEGVK Oxidation (M19)- Deamidated (Q20)                     | 62.2<br>29.7<br>27.9                         | 1.00 | 127 | 4  | 2 | 1 | 5.0  | FLIFNVEQLEDPEVALR<br>FLIFNVEQLEDPEVALR Deamidated (N5)                                                                                                                                   | 65.5<br>49.1                                 |
| 284 | Tb927.10.2770  | eukaryotic translation initiation factor 5, putative                               | 1.00 | 197 | 13 | 4 | 4 | 10.7 | SCRNPETQLSVER Carbamidomethyl (C2)<br>YVQSEFGAQR<br>YVYALATHFAK<br>YVYALATHFAKNQAAALR                                                             | 31.6<br>21.5<br>57.7<br>39.1                 | 0.00 | 0   | 0  | 0 | 0 | 0.0  |                                                                                                                                                                                          |                                              |
| 285 | Tb927.7.3980   | immunodominant antigen, putative, tcd4 antigen-like                                | 1.00 | 105 | 7  | 3 | 2 | 2.3  | RSPAGAAKPSNVLAPTTGTK<br>RSPAGAAKPSNVLAPTTGTK Deamidated (N12)<br>RSPAGAAKPSNVLAPTTGTK                                                             | 37.7<br>20.3<br>23.6                         | 0.52 | 39  | 2  | 2 | 1 | 2.3  | RSPAGAAKPSNVLAPTTGTK<br>RSPAGAAKPSNVLAPTTGTK Deamidated (N12)                                                                                                                            | 24.8<br>14.3                                 |
| 286 | Tb927.3.3590   | U3 small nucleolar ribonucleoprotein protein MPP10, putative                       | 1.00 | 83  | 3  | 2 | 2 | 5.1  | FVKELEGAR<br>LAQHLDALSNFHYTRKPVQEDLSAR                                                                                                            | 35.2<br>43.1                                 | 0.00 | 3   | 1  | 1 | 1 | 3.7  | LAQHLDALSNFHYTRKPVQEDLSAR                                                                                                                                                                | 3.3                                          |
| 287 | Tb927.11.11540 | DNA topoisomerase II, putative                                                     | 1.00 | 155 | 13 | 4 | 4 | 3.4  | FGSTCDLPSALDIOVLK Carbamidomethyl (C5)- Carbamidomethyl (C14)                                                                                     | 18.6                                         | 0.94 | 36  | 2  | 1 | 1 | 0.8  | LRVPLLSDAAR                                                                                                                                                                              | 32.5                                         |



Peptides

|     |                |                                                                                                                            |      |     |    |   |   |   |      |                                                                                                                                                                   |                                     |      |     |    |   |   |      |                                                                                                                  |                                                                                 |                      |
|-----|----------------|----------------------------------------------------------------------------------------------------------------------------|------|-----|----|---|---|---|------|-------------------------------------------------------------------------------------------------------------------------------------------------------------------|-------------------------------------|------|-----|----|---|---|------|------------------------------------------------------------------------------------------------------------------|---------------------------------------------------------------------------------|----------------------|
| 316 | Tb927.6.3890   | replication factor C, subunit 2, putative                                                                                  | 1.00 | 121 | 8  | 4 | 3 | 3 | 14.1 | SLDEVKSGEEVVOALR<br>SLDEVKSGEEVVOALR Deamidated (D8)<br>SSSIALDHWVSGDLR<br>TTALAWAHELFGPDYK                                                                       | 21.0<br>43.5<br>27.5<br>14.1        | 1.00 | 75  | 3  | 2 | 2 | 2    | 9.8                                                                                                              | SLDEVKSGEEVVOALR Deamidated (Q8)<br>TTALAWAHELFGPDYK                            | 19.1<br>46.2         |
| 317 | Tb927.11.16480 | enoyl-CoA hydratase/isomerase family protein, putative                                                                     | 1.00 | 88  | 6  | 2 | 2 | 2 | 8.0  | ATDPNEVFSTDYVQAR<br>THACGDFPEGVR Carbamidomethyl (C4)                                                                                                             | 50.7<br>22.4                        | 0.73 | 55  | 5  | 3 | 3 | 3    | 16.0                                                                                                             | ATDPNEVFSTDYVQAR<br>TAISMEKLSPTSK Oxidation (M6)<br>VFTLKDSTVEDVMGSLAADGGEFAR   | 22.2<br>1.8<br>23.3  |
| 318 | Tb927.7.2190   | hypothetical protein, conserved                                                                                            | 1.00 | 56  | 4  | 1 | 1 | 1 | 8.3  | RVEVGTGGDGYDPDYVSEHLR                                                                                                                                             | 50.1                                | 0.76 | 30  | 2  | 1 | 1 | 1    | 5.3                                                                                                              | VRGGSTPTFHAGSR                                                                  | 21.1                 |
| 319 | Tb927.7.3430   | cyclophilin-type peptidyl-prolyl cis-trans isomerase, putative                                                             | 0.99 | 111 | 7  | 4 | 4 | 4 | 34.2 | ALHTMPGKVLDLSPRY Oxidation (M5)<br>HWITGQSSQSKLELTERALSGER Carbamidomethyl (C6)<br>VRFQFVGGDILLKDKGR<br>VPGFVGGDILLKDKGRNSVVFGRFPDFEFEGK                          | 35.4<br>16.5<br>27.3<br>22.4        | 0.00 | 0   | 0  | 0 | 0 | 0    | 0.0                                                                                                              |                                                                                 |                      |
| 320 | Tb927.11.3770  | hypothetical protein, conserved                                                                                            | 1.00 | 122 | 4  | 3 | 2 | 2 | 12.2 | LLNTNVRAPPLISAANGDTEVTEQ<br>LLNTNVRAPPLISAANGDTEVTEQ Deamidated (N16)<br>TVLLVRRR                                                                                 | 54.8<br>39.0<br>19.4                | 0.00 | 0   | 0  | 0 | 0 | 0    | 0.0                                                                                                              |                                                                                 |                      |
| 321 | Tb927.7.3330   | hypothetical protein, conserved                                                                                            | 1.00 | 122 | 14 | 3 | 3 | 3 | 1.1  | CAVVVDAAACR Carbamidomethyl (C1)- Carbamidomethyl (C11)<br>VVEFDVTHPSHPSIAQR<br>VVRDCVSNVTFPSGR Carbamidomethyl (C5)                                              | 28.3<br>34.1<br>26.9                | 0.90 | 41  | 2  | 2 | 2 | 2    | 1.0                                                                                                              | ELDVQNEKLHEMEQLAEAELEER Deamidated (Q5)<br>VVRDCVSNVTFPSGR Carbamidomethyl (C5) | 34.5<br>6.7          |
| 322 | Tb927.11.7900  | mitochondrial RNA binding protein, RBP16, RNA binding protein of 16 kDa                                                    | 1.00 | 142 | 7  | 5 | 3 | 3 | 51.8 | GFGFIEDADKQHFVHSALOTETGGFR<br>GFGFIEDADKQHFVHSALOTETGGFR Deamidated (Q13)<br>GRNNGQGGQHSFSDDF<br>GRNNGQGGQHSFSDDF Deamidated (N3)<br>TRAENVYSPGAKLPSGRPPREGAGR    | 43.3<br>30.5<br>16.0<br>4.8<br>29.7 | 0.00 | 0   | 0  | 0 | 0 | 0    | 0.0                                                                                                              |                                                                                 |                      |
| 323 | Tb927.11.10240 | hslVU complex proteolytic subunit, putative, hslVU complex proteolytic subunit, threonine peptidase, Clan T(1), family T18 | 1.00 | 153 | 6  | 2 | 2 | 2 | 12.0 | AVELAKEWR<br>ALIDVDGYDEKAR                                                                                                                                        | 53.4<br>68.9                        | 0.00 | 0   | 0  | 0 | 0 | 0    | 0.0                                                                                                              |                                                                                 |                      |
| 324 | Tb927.6.2640   | importin alpha subunit, putative                                                                                           | 0.00 | 22  | 1  | 1 | 1 | 1 | 5.1  | DIALQHNAPAFVNLISDPDQLSIVR                                                                                                                                         | 21.8                                | 1.00 | 51  | 5  | 1 | 1 | 1    | 5.1                                                                                                              | DIALQHNAPAFVNLISDPDQLSIVR                                                       | 43.0                 |
| 325 | Tb927.10.4000  | methylglutaconyl-CoA hydratase, mitochondrial precursor, putative                                                          | 1.00 | 156 | 12 | 3 | 3 | 3 | 24.9 | APLVMGSLNQLQLTADVPAERAGR Oxidation (M5)<br>FGLPETGLAHPGAGTYR<br>LGLVTELVKGGASEALAWAGR                                                                             | 36.0<br>23.7<br>42.0                | 1.00 | 96  | 8  | 2 | 2 | 2    | 15.2                                                                                                             | FGLPETGLAHPGAGTYR<br>LGLVTELVKGGASEALAWAGR                                      | 12.9<br>56.6         |
| 326 | Tb927.4.1540   | hypothetical protein, conserved                                                                                            | 1.00 | 114 | 8  | 2 | 2 | 2 | 4.7  | IAPGATVSTLSQLSSETEKER<br>IAPGATVSTLSQLSSETEKERAK                                                                                                                  | 74.7<br>18.9                        | 1.00 | 80  | 6  | 1 | 1 | 1    | 4.3                                                                                                              | IAPGATVSTLSQLSSETEKER                                                           | 65.3                 |
| 327 | Tb927.6.4630   | kinetoplastid-specific phospho-protein phosphatase, putative                                                               | 0.00 | 7   | 1  | 1 | 1 | 1 | 5.2  | NLLGDYSAVDPGSLAGSGVSGR                                                                                                                                            | 6.6                                 | 1.00 | 210 | 9  | 3 | 3 | 3    | 17.8                                                                                                             | EAQSVGGDVIELGNHIER<br>ITGLVDDRQHWIGDFFVOLGDFDVPDSDIVK<br>NLLGDYSAVDPGSLAGSGVSGR | 39.6<br>44.8<br>56.1 |
| 328 | Tb927.11.5600  | hypothetical protein, conserved                                                                                            | 1.00 | 162 | 7  | 3 | 2 | 2 | 16.8 | LLQEEASQVVR<br>LLQEEASQVVR Deamidated (Q3)<br>SNTEGGRKLLQEEASQVVR                                                                                                 | 30.1<br>40.1<br>40.0                | 0.00 | 9   | 1  | 1 | 1 | 1    | 16.8                                                                                                             | SNTEGGRKLLQEEASQVVR                                                             | 9.3                  |
| 329 | Tb927.10.5990  | hypothetical protein, conserved                                                                                            | 1.00 | 134 | 6  | 2 | 2 | 2 | 3.2  | SIVLALQTLQEK<br>SIVLALQTLQEKIR                                                                                                                                    | 44.3<br>72.2                        | 1.00 | 56  | 1  | 1 | 1 | 1    | 2.7                                                                                                              | SIVLALQTLQEK                                                                    | 55.6                 |
| 330 | Tb927.2.3610   | hypothetical protein, conserved                                                                                            | 1.00 | 185 | 10 | 3 | 3 | 3 | 10.4 | KLAALTDAGIQK<br>LAALTDAGIQK<br>SAKGAALTDAGIQK                                                                                                                     | 43.4<br>32.0<br>62.9                | 0.00 | 0   | 0  | 0 | 0 | 0    | 0.0                                                                                                              |                                                                                 |                      |
| 331 | Tb927.11.10150 | hypothetical protein, conserved                                                                                            | 0.97 | 41  | 1  | 1 | 1 | 1 | 1.4  | LFNLTETAGTSVEPWAR                                                                                                                                                 | 40.7                                | 1.00 | 80  | 2  | 2 | 2 | 2    | 4.4                                                                                                              | LFNLTETAGTSVEPWAR<br>TLTIEQLPQSTHNTSDSHITPYTLGSAVGQR                            | 21.1<br>59.3         |
| 332 | Tb927.7.640    | hypothetical protein, conserved                                                                                            | 1.00 | 130 | 15 | 2 | 2 | 2 | 5.1  | VKEEVAQLAEK<br>VKEEVAQLAEKVSASR                                                                                                                                   | 22.8<br>61.3                        | 1.00 | 115 | 5  | 3 | 2 | 2    | 5.1                                                                                                              | VKEEVAQLAEK<br>VKEEVAQLAEKVSASR Deamidated (Q7)                                 | 16.3<br>49.6<br>37.9 |
| 333 | Tb927.7.5940   | Protein Associated with Differentiation                                                                                    | 1.00 | 68  | 4  | 1 | 1 | 1 | 6.1  | IKAEADNGTNAENVCAEPTCCDNADACLEKAADSK Carbamidomethyl (C15)- Carbamidomethyl (C20)- Carbamidomethyl (C27)                                                           | 57.3                                | 0.00 | 0   | 0  | 0 | 0 | 0    | 0.0                                                                                                              |                                                                                 |                      |
| 334 | Tb927.10.7380  | hypothetical protein, conserved                                                                                            | 1.00 | 172 | 7  | 3 | 2 | 2 | 15.8 | ILPAPVEGTPAHTAVEQLLAEVQCEALGASVADPVTATR Carbamidomethyl (C27)<br>ILPAPVEGTPAHTAVEQLLAEVQCEALGASVADPVTATR Deamidated (G16)- Carbamidomethyl (C27)<br>VLSNERPLQNVYR | 63.8<br>56.5<br>25.6                | 1.00 | 100 | 7  | 1 | 1 | 1    | 12.0                                                                                                             | ILPAPVEGTPAHTAVEQLLAEVQCEALGASVADPVTATR Carbamidomethyl (C27)                   | 60.4                 |
| 335 | Tb927.11.4680  | hypothetical protein, conserved                                                                                            | 1.00 | 122 | 6  | 3 | 3 | 3 | 17.1 | KLGTVAAPR<br>KPPVYELPPGDATIDEFELPAFEGTFDNEGSMVGR Oxidation (M34)<br>QMTAGTLLER Oxidation (M2)                                                                     | 41.8<br>25.8<br>42.1                | 0.00 | 0   | 0  | 0 | 0 | 0    | 0.0                                                                                                              |                                                                                 |                      |
| 336 | Tb927.9.2320   | hypothetical protein, conserved                                                                                            | 1.00 | 89  | 3  | 2 | 2 | 2 | 10.9 | NVQSANLNQPKYEAPLQGDITVER<br>TACLPGAVPQR Carbamidomethyl (C3)                                                                                                      | 65.0<br>18.1                        | 1.00 | 142 | 3  | 3 | 1 | 7.6  | NVQSANLNQPKYEAPLQGDITVER<br>NVQSANLNQPKYEAPLQGDITVER Deamidated (N1)<br>NVQSANLNQPKYEAPLQGDITVER Deamidated (Q4) | 46.8<br>39.8<br>55.4                                                            |                      |
| 337 | Tb927.10.11520 | hypothetical protein, conserved                                                                                            | 1.00 | 134 | 5  | 3 | 3 | 3 | 27.4 | ATQAFQSVGALR<br>ATQAFQSVGALRQSNLHR Oxidation (M13)<br>CLDTEELYTLR Carbamidomethyl (C1)                                                                            | 53.6<br>31.9<br>29.1                | 0.00 | 0   | 0  | 0 | 0 | 0    | 0.0                                                                                                              |                                                                                 |                      |
| 338 | Tb927.10.3040  | hypothetical protein, conserved                                                                                            | 1.00 | 171 | 18 | 4 | 4 | 4 | 20.0 | APESIFKY<br>AVLDEVREAVVDGK<br>AVLDEVREAVVDGKK<br>RAPESIFKY                                                                                                        | 40.9<br>36.7<br>26.2<br>34.8        | 0.00 | 0   | 0  | 0 | 0 | 0    | 0.0                                                                                                              |                                                                                 |                      |
| 339 | Tb927.10.14700 | hypothetical protein, conserved                                                                                            | 1.00 | 117 | 6  | 3 | 3 | 3 | 9.9  | GGSSPSFLEMR<br>SLRDSSTINR<br>VROPDLGEHPLR                                                                                                                         | 61.0<br>15.5<br>26.9                | 0.00 | 0   | 0  | 0 | 0 | 0    | 0.0                                                                                                              |                                                                                 |                      |
| 340 | Tb927.7.680    | chaperone protein DNAj, putative                                                                                           | 1.00 | 121 | 5  | 2 | 2 | 2 | 4.8  | FAAQNVLDVAITEGRR<br>SGQPOSEVADALDELSGR                                                                                                                            | 33.2<br>68.5                        | 1.00 | 117 | 5  | 2 | 2 | 2    | 4.8                                                                                                              | FAAQNVLDVAITEGRR<br>SGQPOSEVADALDELSGR                                          | 13.9<br>60.2         |
| 341 | Tb927.5.4330   | dihydroipamide branched chain transacylase, putative                                                                       | 1.00 | 112 | 8  | 4 | 4 | 4 | 12.3 | QLVVPVROVDQK<br>SIVELVHEVNEVTLGR<br>VLATPAVREFAR<br>VLREDVLSYAGK                                                                                                  | 26.4<br>11.3<br>35.3<br>24.9        | 0.99 | 50  | 3  | 2 | 2 | 2    | 6.6                                                                                                              | SIVELVHEVNEVTLGR<br>VLATPAVREFAR                                                | 27.7<br>2.1          |
| 342 | Tb927.8.610    | hypothetical protein, conserved                                                                                            | 1.00 | 127 | 6  | 3 | 2 | 2 | 3.2  | NEAQELRLR<br>VAAAGVTYVKLQELQAARNEAQELR<br>VAAAGVTYVKLQELQAARNEAQELR Deamidated (Q12)                                                                              | 29.7<br>44.7<br>30.7                | 0.00 | 13  | 1  | 1 | 1 | 3.0  | VAAAGVTYVKLQELQAARNEAQELR                                                                                        | 12.9                                                                            |                      |
| 343 | Tb927.4.4700   | hypothetical protein, conserved                                                                                            | 0.96 | 63  | 3  | 2 | 2 | 2 | 7.4  | HTFPAIGQPR<br>LLAEAAAAAR                                                                                                                                          | 35.9<br>25.1                        | 0.00 | 0   | 0  | 0 | 0 | 0    | 0.0                                                                                                              |                                                                                 |                      |
| 344 | Tb927.10.12590 | hypothetical protein, conserved                                                                                            | 1.00 | 131 | 6  | 2 | 2 | 2 | 4.6  | ATTGPLGTSFAFAEDLQR<br>TTALVAGQKTEELAAAMAENHAIR Oxidation (M17)                                                                                                    | 57.0<br>40.6                        | 0.00 | 0   | 0  | 0 | 0 | 0    | 0.0                                                                                                              |                                                                                 |                      |
| 345 | Tb927.7.3500   | glutathione-S-transferase:glutaredoxin, putative                                                                           | 1.00 | 67  | 4  | 2 | 2 | 2 | 12.5 | FHGSKPOLADLTHVLSQVSR<br>LYNEIEATTKPWLER                                                                                                                           | 39.4<br>22.7                        | 1.00 | 135 | 12 | 3 | 2 | 12.5 | FHGSKPOLADLTHVLSQVSR<br>LYNEIEATTKPWLER<br>LYNEIEATTKPWLER Deamidated (N5)                                       | 20.0<br>47.0<br>30.4                                                            |                      |
| 346 | Tb927.11.900   | isocitrate dehydrogenase, putative                                                                                         | 1.00 | 131 | 14 | 3 | 3 | 3 | 13.3 | HAFGDOYSADVAVKEPTEMR Oxidation (M22)<br>LVTWKKPVIGR<br>TILGGTVFREPICSNVR Carbamidomethyl (C14)                                                                    | 31.0<br>18.1<br>47.0                | 0.00 | 12  | 1  | 1 | 1 | 4.6  | TILGGTVFREPICSNVR Carbamidomethyl (C14)                                                                          | 11.7                                                                            |                      |

|     |                |                                                                                            |      |     |    |   |   |      |                                                                                                                                                                                      |                                      |      |     |   |   |   |      |                                                                                                                       |                              |
|-----|----------------|--------------------------------------------------------------------------------------------|------|-----|----|---|---|------|--------------------------------------------------------------------------------------------------------------------------------------------------------------------------------------|--------------------------------------|------|-----|---|---|---|------|-----------------------------------------------------------------------------------------------------------------------|------------------------------|
| 347 | Tb927.5.2790   | mitochondrial DNA polymerase beta-PAK                                                      | 1.00 | 143 | 8  | 5 | 4 | 9.1  | AKSPAPFPALDADDAVAVPTPK<br>QAAAAAPVSPRPVQAGTR<br>QAAAAAPVSPRPVQAGTR Deamidated (G1)<br>SPWVGTIEDAVDEKDGAAVGRNAK<br>SPWVGTIEDAVDEKDGAAVGRNAK                                           | 16.8<br>23.3<br>34.6<br>23.7<br>28.4 | 0.00 | 0   | 0 | 0 | 0 | 0.0  |                                                                                                                       |                              |
| 348 | Tb927.5.4470   | hypothetical protein, conserved                                                            | 1.00 | 121 | 6  | 3 | 2 | 3.6  | AVGVYGGGCGTGYLK Carbamidomethyl (C9)<br>LVLANAASQVEVQR<br>LVLANAASQVEVQR Deamidated (N6)                                                                                             | 14.4<br>34.3<br>39.2                 | 0.99 | 48  | 2 | 2 | 2 | 3.0  | LVLANAASQVEVQR<br>VLNERVENLTK                                                                                         | 46.6<br>1.8                  |
| 349 | Tb927.3.5430   | hypothetical protein, conserved                                                            | 1.00 | 142 | 9  | 3 | 3 | 15.9 | LKPLVYGSQR<br>SKSLKLAIPRR<br>SVSLGRREGQIAFVGEIEKLR                                                                                                                                   | 43.6<br>35.3<br>46.1                 | 0.00 | 0   | 0 | 0 | 0 | 0.0  |                                                                                                                       |                              |
| 350 | Tb927.10.4080  | hypothetical protein, conserved                                                            | 1.00 | 103 | 20 | 2 | 2 | 1.7  | AAPPAPELQK<br>AAPPAPELQKAAAPPAPELQK                                                                                                                                                  | 29.4<br>52.2                         | 0.41 | 35  | 2 | 1 | 1 | 0.9  | AAPPAPELQK                                                                                                            | 29.6                         |
| 351 | Tb927.10.7810  | hypothetical protein, conserved                                                            | 1.00 | 95  | 6  | 2 | 2 | 6.5  | LASDAAAEADTRFGSK<br>YVDDSEVFNPNKADRPANVYQPLAAMK                                                                                                                                      | 33.5<br>40.1                         | 0.00 | 0   | 0 | 0 | 0 | 0.0  |                                                                                                                       |                              |
| 352 | Tb927.11.10680 | hypothetical protein, conserved                                                            | 0.78 | 30  | 1  | 1 | 1 | 1.7  | TLVDCRR Carbamidomethyl (C5)                                                                                                                                                         | 29.6                                 | 0.99 | 73  | 6 | 2 | 2 | 10.1 | AVLEELLALHPEYAPLR<br>AFVLPFDSPTPPSPDLDSAAR                                                                            | 21.3<br>24.9                 |
| 353 | Tb927.10.5840  | translation elongation factor 1-beta, putative                                             | 0.00 | 17  | 2  | 2 | 2 | 17.9 | DGLLWGDHKLVPVAFGK<br>LSAQPVYSGFTPSKEDAR                                                                                                                                              | 6.0<br>11.1                          | 1.00 | 135 | 5 | 4 | 4 | 44.8 | AAAGDDDDILFGEATEEELAALEAK<br>DGLLWGDHKLVPVAFGK<br>LSAQPVYSGFTPSKEDAR<br>SSLFDKPVWDVTVLQDLAQLKHAUKR                    | 35.7<br>28.7<br>35.8<br>32.9 |
| 354 | Tb927.3.750    | hypothetical protein, conserved                                                            | 1.00 | 149 | 6  | 3 | 2 | 10.2 | VSPKGGTIDSPNDGIVTK<br>VSPKGGTIDSPNDGIVTKVDKIDNPNNGGAYAR<br>VSPKGGTIDSPNDGIVTKVDKIDNPNNGGAYAR Deamidated (D5)                                                                         | 43.1<br>44.2<br>48.5                 | 0.00 | 0   | 0 | 0 | 0 | 0.0  |                                                                                                                       |                              |
| 355 | Tb927.8.1270   | hypothetical protein, conserved                                                            | 1.00 | 90  | 6  | 3 | 3 | 7.5  | AREVIVETSPLQK<br>CGALPFEKAEVIR<br>TAWATAWAAGKSDGR                                                                                                                                    | 23.2<br>12.9<br>40.4                 | 0.97 | 39  | 2 | 1 | 1 | 2.9  | TAWATAWAAGKSDGR                                                                                                       | 27.9                         |
| 356 | Tb927.4.1920   | GPI transamidase, putative                                                                 | 1.00 | 70  | 3  | 2 | 1 | 2.6  | LVNPTPEVPTSGNSNTK<br>LVNPTPEVPTSGNSNTK Deamidated (N16)                                                                                                                              | 41.6<br>5.5                          | 0.97 | 66  | 2 | 2 | 2 | 6.7  | LVNPTPEVPTSGNSNTK Deamidated (N16)<br>SGNDNQALGVETPTAQHFISAYGDR                                                       | 31.7<br>33.8                 |
| 357 | Tb927.7.3050   | hypothetical protein, conserved                                                            | 0.00 | 18  | 1  | 1 | 1 | 2.3  | VKDATAEAGVTHPAADFTPFCAFLR Carbamidomethyl (C23)                                                                                                                                      | 18.4                                 | 1.00 | 66  | 2 | 1 | 1 | 2.3  | VKDATAEAGVTHPAADFTPFCAFLR Carbamidomethyl (C23)                                                                       | 43.3                         |
| 358 | Tb927.11.880   | cyclophilin a,cyclophilin type peptidyl-prolyl cis-trans isomerase                         | 1.00 | 70  | 3  | 2 | 2 | 18.6 | ALCTGEGKFGYAGSFHR Carbamidomethyl (C3)<br>SIYGEKFPDESFAK                                                                                                                             | 31.2<br>24.9                         | 0.00 | 0   | 0 | 0 | 0 | 0.0  |                                                                                                                       |                              |
| 359 | Tb927.1.2100   | calpain-like cysteine peptidase, putative,cysteine peptidase, Clan CA, family C2, putative | 1.00 | 87  | 6  | 3 | 3 | 4.0  | AVPLTEEYAR<br>HTQESVNDLTKPR<br>VVGNSADAYHPLSKWTFYQAR                                                                                                                                 | 23.7<br>31.2<br>1.5                  | 0.00 | 0   | 0 | 0 | 0 | 0.0  |                                                                                                                       |                              |
| 360 | Tb927.5.800    | casein kinase I, isoform 2                                                                 | 1.00 | 89  | 4  | 3 | 3 | 15.4 | IHDTLQEGRADQQQQQQQQQR<br>ISDRKQTTSETLCLR Carbamidomethyl (C14)<br>SFPAAEFAVLYNTR                                                                                                     | 35.1<br>12.5<br>39.5                 | 0.00 | 0   | 0 | 0 | 0 | 0.0  |                                                                                                                       |                              |
| 361 | Tb927.10.8590  | flagellum transition zone component                                                        | 1.00 | 129 | 6  | 2 | 1 | 2.7  | ESAGSASSENKLSDNVAVPPRRVSVVPAVPR<br>ESAGSASSENKLSDNVAVPPRRVSVVPAVPR Deamidated (N17)                                                                                                  | 62.6<br>34.9                         | 0.00 | 0   | 0 | 0 | 0 | 0.0  |                                                                                                                       |                              |
| 362 | Tb927.10.7230  | hypothetical protein, conserved                                                            | 0.99 | 60  | 5  | 2 | 2 | 1.5  | ALCHVDHPTDLSEWAEPLVR Carbamidomethyl (C3)<br>ALLVFKPHANTPETR                                                                                                                         | 23.9<br>15.2                         | 0.00 | 11  | 1 | 1 | 1 | 0.9  | ALCHVDHPTDLSEWAEPLVR Carbamidomethyl (C3); Deamidated (N18)                                                           | 10.9                         |
| 363 | Tb927.11.9530  | 14-3-3-1 protein                                                                           | 1.00 | 91  | 3  | 2 | 2 | 16.0 | LLRDLNLVTDQPVN<br>QAYDEAVTELETLDDEAYRESNLIVR                                                                                                                                         | 29.0<br>57.5                         | 1.00 | 128 | 5 | 3 | 2 | 16.0 | LLRDLNLVTDQPVN<br>QAYDEAVTELETLDDEAYRESNLIVR<br>QAYDEAVTELETLDDEAYRESNLIVR Deamidated (G1)                            | 29.2<br>44.6<br>29.8         |
| 364 | Tb927.4.3450   | hypothetical protein, conserved                                                            | 1.00 | 78  | 4  | 1 | 1 | 21.1 | VLDETYTEWTEELDQAVTDAITR                                                                                                                                                              | 71.4                                 | 0.00 | 5   | 1 | 1 | 1 | 21.1 | VLDETYTEWTEELDQAVTDAITR                                                                                               | 4.8                          |
| 365 | Tb927.11.2430  | dynein heavy chain, putative                                                               | 1.00 | 56  | 3  | 1 | 1 | 0.4  | SGPVVIESQLLNVQR                                                                                                                                                                      | 51.0                                 | 0.00 | 35  | 2 | 2 | 2 | 1.3  | LLSDLANSGGDLLENTALIGALNDVKVQASSITALEK Deamidated (N7)<br>SGPVVIESQLLNVQR                                              | 31.8<br>3.5                  |
| 366 | Tb927.10.1060  | hypothetical protein, conserved                                                            | 0.99 | 63  | 5  | 2 | 2 | 11.5 | DVAFGTLRELSSGNQR<br>TVLSVSPDERHGSVFPQ                                                                                                                                                | 14.1<br>31.2                         | 0.95 | 66  | 4 | 2 | 2 | 9.5  | DVAFGTLRELSSGNQR<br>RMINEDPQER Oxidation (M2)                                                                         | 32.2<br>26.2                 |
| 367 | Tb927.11.1620  | hypothetical protein, conserved                                                            | 1.00 | 110 | 3  | 2 | 2 | 16.7 | KFELLPTSAEAEAR<br>NLSHVVTIDSIVETR                                                                                                                                                    | 40.8<br>64.1                         | 0.00 | 0   | 0 | 0 | 0 | 0.0  |                                                                                                                       |                              |
| 368 | Tb927.1.2670   | flagellar protein PF16                                                                     | 1.00 | 89  | 5  | 2 | 2 | 3.5  | ALKNIQR<br>VLPDIAKR                                                                                                                                                                  | 44.2<br>28.5                         | 1.00 | 49  | 1 | 1 | 1 | 2.3  | SAAAWSLQIGR                                                                                                           | 48.7                         |
| 369 | Tb927.11.9570  | hypothetical protein, conserved                                                            | 1.00 | 135 | 4  | 3 | 2 | 14.1 | GLRDEQVWASGLPQASDVALAR<br>LSALQVLLLESNLCEIR Carbamidomethyl (C14)<br>LSALQVLLLESNLCEIR Deamidated (D5); Carbamidomethyl (C14)                                                        | 27.4<br>56.3<br>45.5                 | 0.44 | 66  | 2 | 2 | 1 | 5.7  | LSALQVLLLESNLCEIR Deamidated (N12); Carbamidomethyl (C14)<br>LSALQVLLLESNLCEIR Deamidated (D5); Carbamidomethyl (C14) | 44.6<br>21.8                 |
| 370 | Tb927.10.14680 | intraflagellar transport protein IFT52, putative                                           | 0.40 | 25  | 1  | 1 | 1 | 2.3  | VAVEQEEELPRDFTK                                                                                                                                                                      | 25.4                                 | 1.00 | 73  | 5 | 2 | 2 | 6.3  | LNQIDAEPTDITYHHPDIALSER<br>VAVEQEEELPRDFTK                                                                            | 31.1<br>17.4                 |
| 371 | Tb927.11.15550 | NADH-cytochrome b5 reductase, putative                                                     | 1.00 | 63  | 4  | 1 | 1 | 6.5  | FKPLALGEVNLAEVAFRR                                                                                                                                                                   | 46.8                                 | 1.00 | 114 | 7 | 1 | 1 | 6.5  | FKPLALGEVNLAEVAFRR                                                                                                    | 72.2                         |
| 372 | Tb927.3.4650   | C-8 sterol isomerase, putative                                                             | 0.99 | 68  | 7  | 3 | 2 | 6.8  | MPQPCFALEYAR Oxidation (M1); Carbamidomethyl (C5)<br>CYKAMPQPCFALEYAR Deamidated (G1); Oxidation (M4); Carbamidomethyl (C9)<br>CYKAMPQPCFALEYAR Oxidation (M4); Carbamidomethyl (C8) | 33.0<br>34.3<br>16.0                 | 0.00 | 0   | 0 | 0 | 0 | 0.0  |                                                                                                                       |                              |
| 373 | Tb927.7.2710   | NADH-cytochrome b5 reductase, putative                                                     | 1.00 | 88  | 4  | 1 | 1 | 6.3  | IGLASDGTGIAPVYQVAR                                                                                                                                                                   | 72.5                                 | 1.00 | 93  | 3 | 1 | 1 | 6.3  | IGLASDGTGIAPVYQVAR                                                                                                    | 78.4                         |
| 374 | Tb927.5.1710   | ribonucleoprotein p18, mitochondrial precursor, putative                                   | 1.00 | 119 | 9  | 2 | 2 | 21.8 | KYDLFGYEVDTNAPWIEK<br>TEGKEHPGHLSSQAGLFDVKKVE                                                                                                                                        | 60.6<br>27.5                         | 0.00 | 0   | 0 | 0 | 0 | 0.0  |                                                                                                                       |                              |
| 375 | Tb927.3.5370   | hypothetical protein, conserved                                                            | 1.00 | 87  | 5  | 2 | 2 | 12.5 | RVPPEPSTPTEALTPESVKK<br>YFVITKPEVDDDDPLAK                                                                                                                                            | 19.7<br>57.8                         | 0.26 | 24  | 1 | 1 | 1 | 6.7  | RVPPEPSTPTEALTPESVKK                                                                                                  | 24.1                         |
| 376 | Tb927.4.470    | snoRNP protein GAR1, putative                                                              | 0.99 | 59  | 5  | 2 | 2 | 17.0 | FNAPFYGANKAK<br>TVPGQAESISAGDTIYISPTQISPLR                                                                                                                                           | 44.3<br>12.4                         | 0.96 | 64  | 7 | 2 | 2 | 17.0 | FNAPFYGANKAK<br>TVPGQAESISAGDTIYISPTQISPLR                                                                            | 26.2<br>28.3                 |
| 377 | Tb927.11.2610  | hypothetical protein, conserved                                                            | 0.97 | 85  | 5  | 3 | 3 | 8.2  | AGGDENLPHLDELHLER<br>IRGELPLAGTR<br>VORLEGFAGR                                                                                                                                       | 22.1<br>26.5<br>30.9                 | 1.00 | 82  | 3 | 2 | 2 | 6.1  | AGGDENLPHLDELHLER<br>IRGELPLAGTR                                                                                      | 32.4<br>43.2                 |
| 378 | Tb927.11.4880  | hypothetical protein, conserved                                                            | 1.00 | 138 | 8  | 4 | 4 | 17.9 | AHNFVYDDRN<br>GVFVQATKVK<br>KNEGVTASR<br>NYVANAVENLALPTK                                                                                                                             | 34.8<br>26.4<br>31.0<br>30.5         | 0.00 | 22  | 1 | 1 | 1 | 6.2  | NYVANAVENLALPTK                                                                                                       | 21.8                         |
| 379 | Tb927.3.2310   | flagellar component,PAICRGA                                                                | 1.00 | 66  | 4  | 2 | 2 | 6.7  | ARGDAIDFGQR<br>FAYKGTVQR                                                                                                                                                             | 42.2<br>13.9                         | 0.00 | 0   | 0 | 0 | 0 | 0.0  |                                                                                                                       |                              |
| 380 | Tb927.11.5420  | hypothetical protein, conserved                                                            | 0.96 | 75  | 2  | 2 | 2 | 9.7  | ELEKMAKNR Oxidation (M5)<br>NAAAALVDPALKDEEIDLETR                                                                                                                                    | 29.3<br>45.5                         | 0.00 | 0   | 0 | 0 | 0 | 0.0  |                                                                                                                       |                              |

Peptides

|     |                |                                                                                                    |      |     |    |   |   |      |                                                                                                                                 |                              |      |     |    |   |   |      |                                                                                                                                                                         |                      |
|-----|----------------|----------------------------------------------------------------------------------------------------|------|-----|----|---|---|------|---------------------------------------------------------------------------------------------------------------------------------|------------------------------|------|-----|----|---|---|------|-------------------------------------------------------------------------------------------------------------------------------------------------------------------------|----------------------|
| 381 | Tb927.9.6870   | RNA-binding protein, putative                                                                      | 1.00 | 64  | 6  | 2 | 2 | 18.9 | ACEFVETFGKEFR Carbamidomethyl (C2)<br>RPPGFARTIAPSR                                                                             | 12.2<br>35.1                 | 0.26 | 22  | 2  | 1 | 1 | 9.5  | RPPGFARTIAPSR                                                                                                                                                           | 20.3                 |
| 382 | Tb927.10.6220  | 5'-3' exonuclease XRND, putative, 5'-3' exonuclease 2, putative                                    | 1.00 | 112 | 5  | 3 | 3 | 7.2  | DVQIVCPDAAAEKTHAGAEICNAAR Carbamidomethyl (C6)<br>HPVQQLLAVLPR<br>SSMKRPIEVAAKFIAGR Oxidation (M3)                              | 9.7<br>57.3<br>39.8          | 1.00 | 58  | 2  | 1 | 1 | 1.5  | HPVQQLLAVLPR                                                                                                                                                            | 57.6                 |
| 383 | Tb927.7.1670   | hypothetical protein, conserved                                                                    | 1.00 | 87  | 5  | 2 | 2 | 18.8 | TKVQATQAVPLVLAAMGEHLR Oxidation (M17)<br>TVTDGFSHADVVR                                                                          | 31.7<br>30.1                 | 0.00 | 0   | 0  | 0 | 0 | 0.0  |                                                                                                                                                                         |                      |
| 384 | Tb927.10.11760 | pumilio/PUF RNA binding protein 6                                                                  | 0.99 | 81  | 8  | 3 | 2 | 2.7  | WAHLNHAWEFAQDQEGSR<br>WAHLNHAWEFAQDQEGSR Deamidated (O15)<br>WAHLNHAWEFAQDQEGSRFDR                                              | 10.5<br>34.5<br>22.9         | 0.99 | 43  | 2  | 1 | 1 | 2.3  | WAHLNHAWEFAQDQEGSR                                                                                                                                                      | 34.8                 |
| 385 | Tb927.4.560    | dynein heavy chain, putative                                                                       | 1.00 | 46  | 7  | 1 | 1 | 0.7  | TEANTPLILTTTGADPSQELGAHAHQK                                                                                                     | 33.5                         | 0.00 | 0   | 0  | 0 | 0 | 0.0  |                                                                                                                                                                         |                      |
| 386 | Tb927.5.2850   | radial spoke protein RSP2, putative                                                                | 0.99 | 99  | 6  | 3 | 2 | 9.9  | AWAETVLAQSPNPQVEYALYLLHLVQEEQNAIAATR<br>AWAETVLAQSPNPQVEYALYLLHLVQEEQNAIAATR Deamidated (O9)<br>GTLPSDDAMEKLVK                  | 36.4<br>31.3<br>29.9         | 1.00 | 126 | 5  | 2 | 1 | 7.1  | AWAETVLAQSPNPQVEYALYLLHLVQEEQNAIAATR<br>AWAETVLAQSPNPQVEYALYLLHLVQEEQNAIAATR Deamidated (O9)                                                                            | 44.4<br>54.0         |
| 387 | Tb927.5.2780   | mitochondrial DNA polymerase beta                                                                  | 1.00 | 119 | 7  | 2 | 2 | 11.6 | AAATLFDREGIFTEVDLEKADQQLTEQQR<br>LKAQELTQIHGFGPR                                                                                | 40.8<br>54.5                 | 1.00 | 49  | 4  | 1 | 1 | 7.6  | AAATLFDREGIFTEVDLEKADQQLTEQQR                                                                                                                                           | 38.9                 |
| 388 | Tb927.10.9520  | hypothetical protein, conserved                                                                    | 1.00 | 138 | 8  | 4 | 3 | 12.4 | GQLGGESSSPFNLSAQLAGQKR<br>NNAGSGTKGLGGESSSPFNLSAQLAGQKR<br>NNAGSGTKGLGGESSSPFNLSAQLAGQKR Deamidated (N2)<br>RSTTVPPVSLVPLPSDAAR | 21.0<br>38.6<br>32.0<br>23.1 | 0.00 | 4   | 1  | 1 | 1 | 4.9  | RSTTVPPVSLVPLPSDAAR                                                                                                                                                     | 4.4                  |
| 389 | Tb927.11.16830 | Rab-like 5, small G protein                                                                        | 0.84 | 54  | 3  | 2 | 2 | 17.8 | ALETSLDYQSDNFKEAFDALVEQIASR<br>STVYNFLAGTR                                                                                      | 22.5<br>24.5                 | 1.00 | 64  | 2  | 1 | 1 | 12.8 | ALETSLDYQSDNFKEAFDALVEQIASR                                                                                                                                             | 50.0                 |
| 390 | Tb927.7.920    | dynein heavy chain, putative                                                                       | 1.00 | 71  | 2  | 1 | 1 | 0.5  | ILHLTSTSTGNDLNEPLVR                                                                                                             | 46.9                         | 0.00 | 0   | 0  | 0 | 0 | 0.0  |                                                                                                                                                                         |                      |
| 391 | Tb927.11.5180  | hypothetical protein, conserved                                                                    | 1.00 | 90  | 9  | 2 | 2 | 8.4  | CSAGCAVIEHAWR Carbamidomethyl (C1)<br>LLRPIER                                                                                   | 51.6<br>27.0                 | 0.00 | 0   | 0  | 0 | 0 | 0.0  |                                                                                                                                                                         |                      |
| 392 | Tb927.10.15250 | parafagellar rod component, putative                                                               | 1.00 | 52  | 2  | 1 | 1 | 2.7  | LAELDQPEVHER                                                                                                                    | 39.7                         | 0.99 | 45  | 2  | 1 | 1 | 2.7  | LAELDQPEVHER                                                                                                                                                            | 41.3                 |
| 393 | Tb927.7.6660   | chaperone protein DnaJ, putative                                                                   | 1.00 | 93  | 7  | 2 | 2 | 12.1 | GSGVPVSGVPADESSR<br>KPREEDVLKNSGR                                                                                               | 52.0<br>22.2                 | 0.00 | 0   | 0  | 0 | 0 | 0.0  |                                                                                                                                                                         |                      |
| 394 | Tb927.3.3330   | heat shock protein 20, putative                                                                    | 1.00 | 99  | 4  | 1 | 1 | 10.6 | VLPLTGAAGSFSFSR                                                                                                                 | 86.5                         | 0.00 | 0   | 0  | 0 | 0 | 0.0  |                                                                                                                                                                         |                      |
| 395 | Tb927.1.3950   | D-alanine aminotransferase                                                                         | 1.00 | 60  | 4  | 1 | 1 | 3.4  | VLVVNPGNPTGSVLR                                                                                                                 | 57.7                         | 0.00 | 0   | 0  | 0 | 0 | 0.0  |                                                                                                                                                                         |                      |
| 396 | Tb927.8.4230   | hypothetical protein, conserved                                                                    | 0.99 | 48  | 2  | 1 | 1 | 1.6  | TIQAAVEEFVANKGR                                                                                                                 | 30.0                         | 0.00 | 0   | 0  | 0 | 0 | 0.0  |                                                                                                                                                                         |                      |
| 397 | Tb927.8.7040   | hypothetical protein, conserved                                                                    | 1.00 | 128 | 15 | 3 | 3 | 24.3 | ATEARVEEEAEGTLELVNTLIR<br>ATEARVEEEAEGTLELVNTLIRK<br>AVGKDEEKEEYSPTEILDVLR                                                      | 22.2<br>25.0<br>47.2         | 0.00 | 0   | 0  | 0 | 0 | 0.0  |                                                                                                                                                                         |                      |
| 398 | Tb927.5.550    | vacuolar ATP synthase, putative                                                                    | 1.00 | 97  | 4  | 1 | 1 | 7.1  | LFPSPGSLVDHDDIAEAEVQLRER                                                                                                        | 69.5                         | 1.00 | 83  | 12 | 1 | 1 | 7.1  | LFPSPGSLVDHDDIAEAEVQLRER                                                                                                                                                | 53.0                 |
| 399 | Tb927.2.4110   | mitochondrial processing peptidase alpha subunit, putative, metallo-peptidase, Clan ME, Family M16 | 1.00 | 109 | 7  | 2 | 2 | 4.9  | TVLAATGVADHK<br>TVLAATGVADHKSFAEVEKLLR                                                                                          | 20.6<br>62.2                 | 0.00 | 0   | 0  | 0 | 0 | 0.0  |                                                                                                                                                                         |                      |
| 400 | Tb927.9.10580  | 3-demethylubiquinone-9 3-methyltransferase, putative                                               | 0.99 | 68  | 3  | 2 | 2 | 9.0  | GVSAAEIKFSR<br>VLRDITPOASLAVR                                                                                                   | 38.9<br>26.1                 | 0.37 | 44  | 1  | 1 | 1 | 3.1  | FPPADLSR                                                                                                                                                                | 43.6                 |
| 401 | Tb927.11.3290  | hypothetical protein, conserved                                                                    | 0.99 | 58  | 3  | 2 | 2 | 2.1  | LLQLEDVKKTPR<br>QQQATQDKVDVVEALAK Deamidated (O2)<br>Deamidated (O3)<br>Deamidated (O6)                                         | 38.5<br>12.6                 | 0.71 | 31  | 1  | 1 | 1 | 1.2  | QQQATQDKVDVVEALAK Deamidated (O2)<br>Deamidated (O3)<br>Deamidated (O6)                                                                                                 | 30.9                 |
| 402 | Tb927.11.4000  | hypothetical protein, conserved                                                                    | 1.00 | 98  | 5  | 2 | 2 | 11.2 | ASSTTLAQWNAWVSYPASSLPDRAGATLPHAPR<br>LLPLVALAQLDADVFLITGPKVPSEVK                                                                | 68.5<br>17.0                 | 0.00 | 0   | 0  | 0 | 0 | 0.0  |                                                                                                                                                                         |                      |
| 403 | Tb927.4.590    | hypothetical protein, conserved                                                                    | 1.00 | 55  | 7  | 2 | 1 | 1.6  | FVGVVEGAALHPK<br>FVGVVEGAALHPK Deamidated (O4)                                                                                  | 34.2<br>7.7                  | 1.00 | 102 | 10 | 3 | 2 | 5.6  | FVGVVEGAALHPK<br>FVGVVEGAALHPK Deamidated (O4)<br>GYLASSSPSVPLVTLVQLFPIHATGEDALR                                                                                        | 34.1<br>13.7<br>26.2 |
| 404 | Tb927.4.600    | hypothetical protein, conserved                                                                    | 0.99 | 56  | 5  | 2 | 2 | 7.6  | FVLFEGDRGGISLQAQGPWVTR<br>SGGISLQAQGPWVTR                                                                                       | 17.0<br>13.8                 | 0.00 | 14  | 1  | 1 | 1 | 7.6  | FVLFEGDRGGISLQAQGPWVTR                                                                                                                                                  | 14.3                 |
| 405 | Tb927.1.1580   | cytochrome c oxidase assembly factor, putative, electron transport protein SCO12, putative         | 1.00 | 78  | 9  | 2 | 1 | 4.7  | GLTGSKEIQAAAR<br>GLTGSKEIQAAAR Deamidated (O11)                                                                                 | 47.6<br>4.1                  | 0.99 | 65  | 2  | 2 | 1 | 4.7  | GLTGSKEIQAAAR<br>GLTGSKEIQAAAR Deamidated (O11)                                                                                                                         | 41.9<br>23.3         |
| 406 | Tb927.6.2560   | hypothetical protein, conserved                                                                    | 0.97 | 38  | 2  | 1 | 1 | 12.6 | LITLDEKINPTVSASFPLVVTAAIPSSLSIQLAPR                                                                                             | 27.1                         | 1.00 | 65  | 5  | 1 | 1 | 12.6 | LITLDEKINPTVSASFPLVVTAAIPSSLSIQLAPR                                                                                                                                     | 52.9                 |
| 407 | Tb927.11.4980  | ATP-dependent DEAD/H RNA helicase, putative, ATP-dependent RNA helicase, putative                  | 0.86 | 33  | 2  | 1 | 1 | 4.8  | NAQNPVALLLPSELOKQTEVANALTR Carbamidomethyl (C17)                                                                                | 26.8                         | 1.00 | 55  | 1  | 1 | 1 | 2.7  | LTAAPLVSTAASLQK                                                                                                                                                         | 54.6                 |
| 408 | Tb927.11.13510 | hypothetical protein, conserved                                                                    | 0.98 | 63  | 5  | 2 | 2 | 21.7 | SRIPTEYR<br>VVGQTPNSVEWDRPNPDPFFFTETTAVER                                                                                       | 24.8<br>34.8                 | 0.00 | 0   | 0  | 0 | 0 | 0.0  |                                                                                                                                                                         |                      |
| 409 | Tb927.11.7780  | hypothetical protein, conserved                                                                    | 0.99 | 87  | 7  | 3 | 3 | 9.6  | LAENFSATSDPR<br>LSAERHGSTLVR<br>SGGHAELAEIEENLCR Carbamidomethyl (C15)                                                          | 24.9<br>25.2<br>22.6         | 0.00 | 0   | 0  | 0 | 0 | 0.0  |                                                                                                                                                                         |                      |
| 410 | Tb927.11.7290  | pantothenate kinase subunit, putative                                                              | 1.00 | 124 | 8  | 3 | 3 | 3.1  | EGEVAGEDNLSNWAK<br>LLNDGPRSTVGLTGFPAK<br>TLPIAMMVTGTR Oxidation (M7)                                                            | 32.0<br>48.8<br>32.0         | 0.00 | 0   | 0  | 0 | 0 | 0.0  |                                                                                                                                                                         |                      |
| 411 | Tb927.9.9860   | hypothetical protein, conserved                                                                    | 1.00 | 93  | 3  | 2 | 2 | 3.1  | ISPLVGGSTVSGQR<br>RVLANEIRR Deamidated (N5)                                                                                     | 55.7<br>31.9                 | 0.00 | 0   | 0  | 0 | 0 | 0.0  |                                                                                                                                                                         |                      |
| 412 | Tb927.11.2510  | hypothetical protein, conserved                                                                    | 0.98 | 81  | 5  | 2 | 2 | 2.4  | RVVGVQNVQVER<br>SRNGLVHADALNEGAWQR Deamidated (N3)                                                                              | 21.8<br>49.1                 | 0.00 | 0   | 0  | 0 | 0 | 0.0  |                                                                                                                                                                         |                      |
| 413 | Tb927.7.3630   | TPR-repeat-containing chaperone protein DnaJ, putative                                             | 0.93 | 36  | 57 | 1 | 1 | 5.5  | YNMILKILLVGAAGAECSGVADDDTTK Deamidated (N2)<br>Oxidation (M3)<br>Carbamidomethyl (C19)                                          | 20.5                         | 1.00 | 83  | 92 | 2 | 2 | 12.3 | AECALCGDNGAAEELKYVQREPNLDLWALGAR Carbamidomethyl (C3)<br>Carbamidomethyl (C7)<br>YNMILKILLVGAAGAECSGVADDDTTK Deamidated (N2)<br>Oxidation (M3)<br>Carbamidomethyl (C19) | 49.5<br>20.9         |
| 414 | Tb927.3.3450   | ADP-ribosylation factor-like protein 3A, putative                                                  | 1.00 | 70  | 7  | 2 | 1 | 9.0  | ILILGLDNAGKTSILR<br>ILILGLDNAGKTSILR Deamidated (N8)                                                                            | 42.9<br>11.0                 | 0.00 | 0   | 0  | 0 | 0 | 0.0  |                                                                                                                                                                         |                      |
| 415 | Tb927.10.16000 | hypothetical protein, conserved                                                                    | 1.00 | 51  | 7  | 1 | 1 | 5.0  | ILANLATQGGKDVSSLTIPIK                                                                                                           | 34.8                         | 0.00 | 21  | 2  | 1 | 1 | 5.0  | ILANLATQGGKDVSSLTIPIK                                                                                                                                                   | 13.6                 |
| 416 | Tb927.11.10140 | hypothetical protein, conserved                                                                    | 1.00 | 79  | 4  | 1 | 1 | 6.7  | AGSEPESTFVDPANLR                                                                                                                | 62.6                         | 0.93 | 37  | 1  | 1 | 1 | 6.7  | AGSEPESTFVDPANLR                                                                                                                                                        | 36.9                 |
| 417 | Tb927.11.3710  | hypothetical protein, conserved                                                                    | 1.00 | 120 | 7  | 3 | 3 | 7.6  | SLIILDEAKDRDQALVAK<br>VLSSTSQVGR                                                                                                | 15.3<br>38.9<br>49.3         | 0.80 | 31  | 2  | 1 | 1 | 3.7  | SULLDEAKDRDQALVAK                                                                                                                                                       | 28.7                 |
| 418 | Tb927.10.11300 | parafagellar rod component, putative                                                               | 0.99 | 79  | 7  | 2 | 1 | 19.8 | ILGRIKEQTEKLNVDVNPATTTSR<br>ILGRIKEQTEKLNVDVNPATTTSR Deamidated (N14)<br>Deamidated (N19)                                       | 32.5<br>36.2                 | 0.00 | 0   | 0  | 0 | 0 | 0.0  |                                                                                                                                                                         |                      |
| 419 | Tb927.7.4550   | 60S ribosomal protein-l1e                                                                          | 1.00 | 134 | 5  | 2 | 2 | 21.9 | GLGGGGGGAAWAFVMAAAGAPSGASATEAEPKTEK<br>GLGGGGGGAAWAFVMAAAGAPSGASATEAEPKTEK                                                      | 58.8<br>52.2                 | 0.00 | 0   | 0  | 0 | 0 | 0.0  |                                                                                                                                                                         |                      |

Peptides

|     |                |                                                                                                                        |      |     |    |   |   |      |                                                                                                                                        |                      |      |     |    |   |   |      |                                                                                                                       |                      |
|-----|----------------|------------------------------------------------------------------------------------------------------------------------|------|-----|----|---|---|------|----------------------------------------------------------------------------------------------------------------------------------------|----------------------|------|-----|----|---|---|------|-----------------------------------------------------------------------------------------------------------------------|----------------------|
| 420 | Tb927.11.5820  | hypothetical protein, conserved                                                                                        | 1.00 | 80  | 3  | 2 | 1 | 3.3  | IAQLGSGDR<br>IAQLGSGDR Deamidated (Q3)                                                                                                 | 57.7<br>19.5         | 0.00 | 0   | 0  | 0 | 0 | 0.0  |                                                                                                                       |                      |
| 421 | Tb927.10.3500  | RNA-binding protein, putative                                                                                          | 1.00 | 67  | 6  | 2 | 2 | 3.1  | SLYGSTVPIFTR<br>VLPADVFPVPIK                                                                                                           | 11.3<br>34.8         | 1.00 | 51  | 5  | 1 | 1 | 1.6  | VLPADVFPVPIK                                                                                                          | 37.9                 |
| 422 | Tb927.10.9810  | hypothetical protein, conserved                                                                                        | 0.99 | 65  | 6  | 2 | 2 | 8.6  | AVENDPANLEFACR Carbamidomethyl (C13)<br>DHWCDRLDLLQR Carbamidomethyl (C4)                                                              | 31.7<br>16.4         | 0.00 | 0   | 0  | 0 | 0 | 0.0  |                                                                                                                       |                      |
| 423 | Tb927.10.16170 | hypothetical protein, conserved                                                                                        | 1.00 | 103 | 3  | 3 | 3 | 5.2  | KGQLHVNALSR<br>LLLRRPAEESPEVSPQREENG<br>RLLLRPAEESPEVSPQREENG                                                                          | 16.4<br>47.6<br>38.7 | 0.00 | 0   | 0  | 0 | 0 | 0.0  |                                                                                                                       |                      |
| 424 | Tb927.9.2050   | hypothetical protein, conserved                                                                                        | 1.00 | 112 | 12 | 3 | 3 | 9.2  | TTPGAASILDPAVYDPLDGGDVRRLQSGK Carbamidomethyl (C20)<br>TTPGAASILDPAVYDPLDGGDVRRLQSGKWK Carbamidomethyl (C20)<br>VGGPHTAVAGFVAPLVNTYRPR | 24.0<br>30.3<br>23.5 | 0.00 | 12  | 1  | 1 | 1 | 3.8  | VGGPHTAVAGFVAPLVNTYRPR                                                                                                | 11.9                 |
| 425 | Tb927.11.6440  | hypothetical protein, conserved                                                                                        | 1.00 | 64  | 7  | 1 | 1 | 2.5  | VVFEAPASHQR                                                                                                                            | 41.0                 | 0.97 | 39  | 1  | 1 | 1 | 2.5  | VVFEAPASHQR                                                                                                           | 39.4                 |
| 426 | Tb927.5.1520   | heat shock protein Hsp70, ATPase subunit Hsp70, putative                                                               | 0.98 | 49  | 2  | 1 | 1 | 3.0  | ALAGVSDGFREHLR                                                                                                                         | 46.0                 | 0.90 | 55  | 3  | 2 | 2 | 8.8  | ALAGVSDGFREHLR<br>KQDFWALQGEELDKVDTEDVSAELR                                                                           | 21.8<br>25.4         |
| 427 | Tb927.4.4690   | hypothetical protein, conserved                                                                                        | 1.00 | 74  | 4  | 2 | 2 | 10.4 | GIVDRQEQMQLR Oxidation (M10)<br>GIVNRPLNQTNDILR                                                                                        | 26.3<br>40.2         | 1.00 | 96  | 2  | 2 | 1 | 5.8  | GIVNRPLNQTNDILR<br>GIVNRPLNQTNDILR Deamidated (N11)                                                                   | 48.4<br>47.4         |
| 428 | Tb927.10.13720 | RNA-binding protein, putative                                                                                          | 1.00 | 75  | 15 | 2 | 2 | 8.2  | GYYAGGLGRAPYTRPFWNPQPEETLK<br>GYYAGGLGRAPYTRPFWNPQPEETLKL                                                                              | 29.1<br>20.9         | 0.94 | 85  | 6  | 3 | 2 | 8.2  | GYYAGGLGRAPYTRPFWNPQPEETLK<br>GYYAGGLGRAPYTRPFWNPQPEETLK Deamidated (Q22)<br>GYYAGGLGRAPYTRPFWNPQPEETLKL              | 24.6<br>29.9<br>19.9 |
| 429 | Tb927.3.2660   | hypothetical protein, conserved                                                                                        | 0.97 | 75  | 4  | 2 | 2 | 5.9  | ASSYKQQLAR<br>GTPPIYVLAEGVYSSNAPGIYRPSFVHSLR                                                                                           | 30.9<br>25.7         | 1.00 | 75  | 1  | 1 | 1 | 4.4  | GTPPIYVLAEGVYSSNAPGIYRPSFVHSLR                                                                                        | 75.4                 |
| 430 | Tb927.7.320    | hypothetical protein, conserved                                                                                        | 1.00 | 87  | 3  | 2 | 2 | 13.9 | ATYSFPLKQPR<br>SWGTEGINAPLQK                                                                                                           | 31.1<br>39.6         | 0.00 | 0   | 0  | 0 | 0 | 0.0  |                                                                                                                       |                      |
| 431 | Tb927.9.9060   | p21 antigen protein, putative                                                                                          | 1.00 | 53  | 1  | 1 | 1 | 12.6 | NQLLOTDDKTPAALDTLKLER                                                                                                                  | 52.8                 | 0.00 | 0   | 0  | 0 | 0 | 0.0  |                                                                                                                       |                      |
| 432 | Tb927.11.10860 | hypothetical protein, conserved                                                                                        | 0.99 | 41  | 2  | 1 | 1 | 0.7  | AQLQGIESALAVLGTTEAEMPLASAGR Carbamidomethyl (C3); Oxidation (M21)                                                                      | 34.0                 | 0.00 | 0   | 0  | 0 | 0 | 0.0  |                                                                                                                       |                      |
| 433 | Tb927.11.14090 | hypothetical protein, conserved                                                                                        | 0.97 | 45  | 4  | 1 | 1 | 2.5  | KVPFAGTVSAK                                                                                                                            | 30.7                 | 0.00 | 17  | 1  | 1 | 1 | 2.5  | KVPFAGTVSAK                                                                                                           | 16.7                 |
| 434 | Tb927.9.8740   | RNA-binding protein                                                                                                    | 1.00 | 114 | 4  | 2 | 1 | 4.9  | GGFDAQKQQLQIGR<br>GGFDAQKQQLQIGR Deamidated (Q11)                                                                                      | 53.5<br>48.6         | 0.00 | 0   | 0  | 0 | 0 | 0.0  |                                                                                                                       |                      |
| 435 | Tb927.7.7500   | thymine-7-hydroxylase, putative                                                                                        | 0.00 | 14  | 2  | 1 | 1 | 5.0  | TWGFHVGHPSFER                                                                                                                          | 11.4                 | 1.00 | 122 | 2  | 2 | 2 | 15.0 | ESSBHPVCGEDTDYDITLLYQDSVGLQLR Carbamidomethyl (Q9)<br>TWGFHVGHPSFER                                                   | 79.8<br>41.9         |
| 436 | Tb927.9.8160   | chaperone protein DNAJ, putative                                                                                       | 1.00 | 75  | 10 | 1 | 1 | 4.7  | LALILHPDKTGGTTEGFTR                                                                                                                    | 37.8                 | 1.00 | 63  | 11 | 1 | 1 | 4.7  | LALILHPDKTGGTTEGFTR                                                                                                   | 38.6                 |
| 437 | Tb927.2.190    | retrotransposon hot spot protein 1 (RH51), putative                                                                    | 0.99 | 102 | 9  | 3 | 3 | 5.6  | GRLDAAVAAK<br>NDPQSVLVLQEP<br>RRDENVPPFAAAGPPQIR                                                                                       | 26.1<br>17.9<br>31.5 | 0.00 | 0   | 0  | 0 | 0 | 0.0  |                                                                                                                       |                      |
| 438 | Tb927.11.10780 | hypothetical protein, conserved                                                                                        | 1.00 | 63  | 3  | 1 | 1 | 5.4  | MGPSEYDELENVER Oxidation (M1)                                                                                                          | 40.9                 | 0.00 | 0   | 0  | 0 | 0 | 0.0  |                                                                                                                       |                      |
| 439 | Tb927.2.2970   | mitochondrial carrier protein, putative                                                                                | 0.00 | 22  | 2  | 1 | 1 | 7.7  | ATAAGIAGVMEGLFHPFDIAKR Oxidation (M10)                                                                                                 | 11.4                 | 0.99 | 44  | 1  | 1 | 1 | 5.5  | VQWKDPGSTLGLVFR                                                                                                       | 44.4                 |
| 440 | Tb927.10.4090  | serine palmitoyltransferase, putative                                                                                  | 1.00 | 85  | 6  | 1 | 1 | 4.7  | GAVVANKAVTEAESCEAYNKQGSVR Carbamidomethyl (C15)                                                                                        | 68.7                 | 0.00 | 0   | 0  | 0 | 0 | 0.0  |                                                                                                                       |                      |
| 441 | Tb04.2AM18.150 | hypothetical protein, conserved                                                                                        | 0.99 | 57  | 5  | 2 | 2 | 29.6 | DLRDAEHLAVLPIEDGEDHAHTESAFSQLPK<br>VLVPAITPAKDSAR                                                                                      | 11.8<br>33.8         | 0.00 | 0   | 0  | 0 | 0 | 0.0  |                                                                                                                       |                      |
| 442 | Tb927.6.4990   | ATP synthase, epsilon chain, putative                                                                                  | 1.00 | 58  | 6  | 1 | 1 | 7.7  | ISVIEVAALKHH                                                                                                                           | 36.5                 | 0.00 | 0   | 0  | 0 | 0 | 0.0  |                                                                                                                       |                      |
| 443 | Tb927.10.9830  | hypothetical protein, conserved                                                                                        | 1.00 | 50  | 3  | 1 | 1 | 7.6  | ANIEGQVAVK                                                                                                                             | 46.9                 | 0.00 | 0   | 0  | 0 | 0 | 0.0  |                                                                                                                       |                      |
| 444 | Tb927.10.10140 | paraflagellar rod component, putative                                                                                  | 0.00 | 23  | 3  | 2 | 1 | 8.8  | AAESEHAAALQFLADEDFRTEKNNR<br>AAESEHAAALQFLADEDFRTEKNNR Deamidated (N28)                                                                | 8.0<br>11.6          | 0.99 | 113 | 3  | 3 | 1 | 8.8  | AAESEHAAALQFLADEDFRTEKNNR<br>AAESEHAAALQFLADEDFRTEKNNR Deamidated (N28)<br>AAESEHAAALQFLADEDFRTEKNNR Deamidated (Q12) | 33.0<br>45.4<br>34.4 |
| 445 | Tb927.6.1570   | 2-hydroxy-3-oxopropionate reductase, putative                                                                          | 1.00 | 64  | 3  | 1 | 1 | 3.3  | AGFLVFNRR                                                                                                                              | 47.9                 | 0.00 | 0   | 0  | 0 | 0 | 0.0  |                                                                                                                       |                      |
| 446 | Tb927.8.6240   | hypothetical protein, conserved                                                                                        | 0.70 | 37  | 6  | 2 | 2 | 7.1  | IYRPAESFKPR<br>YKQELPK                                                                                                                 | 18.2<br>8.1          | 0.96 | 38  | 3  | 1 | 1 | 4.1  | IYRPAESFKPR                                                                                                           | 27.3                 |
| 447 | Tb927.11.1670  | cysteine desulfurase                                                                                                   | 0.99 | 44  | 1  | 1 | 1 | 3.2  | ALGDAENHTSIR                                                                                                                           | 44.3                 | 0.00 | 6   | 1  | 1 | 1 | 3.2  | ALGDAENHTSIR                                                                                                          | 6.5                  |
| 448 | Tb927.10.1100  | 60S ribosomal protein L9, putative                                                                                     | 1.00 | 62  | 2  | 1 | 1 | 5.3  | FLDGYVQTK                                                                                                                              | 55.0                 | 0.00 | 0   | 0  | 0 | 0 | 0.0  |                                                                                                                       |                      |
| 449 | Tb927.3.2880   | hypothetical protein, conserved                                                                                        | 1.00 | 65  | 5  | 2 | 2 | 15.4 | WTGCSVEQLEELSR Carbamidomethyl (C4)<br>WTGCSVEQLEELSRVY Carbamidomethyl (C4)                                                           | 11.6<br>36.8         | 0.00 | 12  | 1  | 1 | 1 | 15.4 | WTGCSVEQLEELSRVY Carbamidomethyl (C4)                                                                                 | 12.1                 |
| 450 | Tb927.11.14700 | hypothetical protein, conserved                                                                                        | 0.94 | 37  | 1  | 1 | 1 | 2.6  | SAAQVTPVIVHSGR                                                                                                                         | 36.9                 | 0.96 | 35  | 1  | 1 | 1 | 5.1  | SGQVSTVAADGESTVPDHPGLRPTGLWK                                                                                          | 35.5                 |
| 451 | Tb927.10.7350  | hypothetical protein, conserved                                                                                        | 0.98 | 55  | 5  | 2 | 2 | 2.2  | TITGDMGAGLLGR Oxidation (M6)<br>VLSAAAPALHSGVADHNTMSLPLKK Oxidation (M20)                                                              | 30.3<br>11.6         | 0.00 | 0   | 0  | 0 | 0 | 0.0  |                                                                                                                       |                      |
| 452 | Tb927.2.270    | retrotransposon hot spot protein (RH5, pseudogene), putative; retrotransposon hot spot protein 3 (RH53), transmembrane | 1.00 | 71  | 4  | 2 | 2 | 6.0  | EFVQPIWATLDR<br>RRDENVPPFAAAGPPQIR                                                                                                     | 26.9<br>42.2         | 0.00 | 0   | 0  | 0 | 0 | 0.0  |                                                                                                                       |                      |
| 453 | Tb927.10.11390 | 60S ribosomal protein L6, putative                                                                                     | 0.00 | 13  | 1  | 1 | 1 | 9.4  | VDTGVDSATTFEKKR                                                                                                                        | 12.7                 | 1.00 | 68  | 2  | 2 | 2 | 21.9 | GVTSDEKRAQLQNAIDALQIAKK<br>VDTGVDSATTFEKKR                                                                            | 11.0<br>57.1         |
| 454 | Tb927.8.3290   | DNA polymerase zeta catalytic subunit, putative                                                                        | 0.98 | 65  | 8  | 2 | 1 | 0.8  | GGSGLLGNQARGAK Deamidated (Q9)<br>GGSGLLGNQARGAK Deamidated (Q9); Deamidated (N8)                                                      | 24.3<br>23.8         | 0.00 | 15  | 1  | 1 | 1 | 0.8  | GGSGLLGNQARGAK Deamidated (Q9)                                                                                        | 14.8                 |
| 455 | Tb927.10.15360 | hypothetical protein, conserved                                                                                        | 1.00 | 58  | 4  | 1 | 1 | 0.7  | NAVNNAPIQGR                                                                                                                            | 50.9                 | 0.00 | 0   | 0  | 0 | 0 | 0.0  |                                                                                                                       |                      |
| 456 | Tb927.10.8640  | COP-coated vesicle membrane protein env25 precursor, putative; ER-golgi transport protein env25 precursor, putative    | 0.00 | 16  | 1  | 1 | 1 | 11.1 | FLQNTQPCFVEEVEDTRFLTGYYTR Carbamidomethyl (C10)                                                                                        | 15.7                 | 1.00 | 103 | 4  | 2 | 1 | 11.1 | FLQNTQPCFVEEVEDTRFLTGYYTR Carbamidomethyl (C10)<br>FLQNTQPCFVEEVEDTRFLTGYYTR Deamidated (N5); Carbamidomethyl (C10)   | 43.4<br>35.1         |
| 457 | Tb927.10.4040  | 3-keto-dihydroxyphosphine reductase                                                                                    | 1.00 | 62  | 3  | 1 | 1 | 5.8  | FQVSPDQVYTPGFEGENIR                                                                                                                    | 53.6                 | 0.96 | 56  | 2  | 2 | 1 | 5.8  | FQVSPDQVYTPGFEGENIR<br>FQVSPDQVYTPGFEGENIR Deamidated (N18)                                                           | 15.8<br>40.4         |
| 458 | Tb927.10.4130  | NADH-ubiquinone oxidoreductase complex I subunit, putative; NDJFA6/13 subunit, putative                                | 1.00 | 53  | 2  | 1 | 1 | 3.4  | FAVDKDLGR                                                                                                                              | 41.6                 | 0.00 | 0   | 0  | 0 | 0 | 0.0  |                                                                                                                       |                      |
| 459 | Tb927.3.1410   | cytochrome oxidase subunit VII                                                                                         | 1.00 | 71  | 11 | 2 | 2 | 11.5 | PRPFGWAWATTLAEYR<br>PRPFGWAWATTLAEYRAR                                                                                                 | 19.8<br>21.0         | 0.00 | 0   | 0  | 0 | 0 | 0.0  |                                                                                                                       |                      |
| 460 | Tb927.11.4690  | hypothetical protein, conserved                                                                                        | 1.00 | 60  | 3  | 2 | 1 | 2.2  | SNYDGTSLPWWAPGKPYPAALSELRLPQPR<br>SNYDGTSLPWWAPGKPYPAALSELRLPQPR Deamidated (N2)                                                       | 38.5<br>9.7          | 0.00 | 15  | 1  | 1 | 1 | 2.2  | SNYDGTSLPWWAPGKPYPAALSELRLPQPR                                                                                        | 14.7                 |
| 461 | Tb927.11.6230  | pretranslocation protein, alpha subunit, putative; SEC01-like (pretranslocation process) protein, putative             | 1.00 | 100 | 4  | 2 | 1 | 3.3  | MSPLAFLPEWATPLR<br>MSPLAFLPEWATPLR Oxidation (M1)                                                                                      | 40.6<br>44.1         | 0.37 | 24  | 1  | 1 | 1 | 3.3  | MSPLAFLPEWATPLR                                                                                                       | 24.1                 |
| 462 | Tb927.8.2020   | agmatinase, putative                                                                                                   | 1.00 | 56  | 3  | 1 | 1 | 4.5  | LGPVALFGYAGMPR Oxidation (M13)                                                                                                         | 51.5                 | 0.00 | 0   | 0  | 0 | 0 | 0.0  |                                                                                                                       |                      |

|     |                |                                                                                     |      |    |    |   |   |      |                                                                              |                     |      |    |   |   |   |      |                                                                              |              |
|-----|----------------|-------------------------------------------------------------------------------------|------|----|----|---|---|------|------------------------------------------------------------------------------|---------------------|------|----|---|---|---|------|------------------------------------------------------------------------------|--------------|
| 463 | Tb927.2.5270   | dynein heavy chain, putative                                                        | 1.00 | 47 | 3  | 1 | 1 | 0.6  | STLLAQGGASAVNPDAEVEKDGRR                                                     | 30.6                | 0.00 | 0  | 0 | 0 | 0 | 0.0  |                                                                              |              |
| 464 | Tb927.10.10010 | 60S acidic ribosomal protein, putative                                              | 1.00 | 99 | 7  | 2 | 2 | 9.3  | RATVPLTK<br>TGVATCPLLLR Carbamidomethyl (C7)                                 | 26.7<br>57.4        | 0.94 | 37 | 1 | 1 | 1 | 5.3  | TGVATCPLLLR Carbamidomethyl (C7)                                             | 36.6         |
| 465 | Tb927.4.3890   | ATP-dependent RNA helicase, putative                                                | 1.00 | 68 | 5  | 2 | 2 | 3.0  | LAALFPEKQVK<br>SSAGRPAAETTSKPEVPKRR                                          | 18.7<br>32.0        | 0.00 | 0  | 0 | 0 | 0 | 0.0  |                                                                              |              |
| 466 | Tb927.11.10090 | hypothetical protein, conserved                                                     | 0.99 | 67 | 4  | 2 | 2 | 5.3  | LHAPQIPAGR<br>NRRGEGDAVR                                                     | 34.4<br>29.2        | 0.00 | 0  | 0 | 0 | 0 | 0.0  |                                                                              |              |
| 467 | Tb927.4.3070   | hypothetical protein, conserved                                                     | 0.99 | 71 | 6  | 2 | 2 | 8.3  | JATAAVIGMNR Oxidation (M6)<br>WATLLPGDLGHTSTTEEDKAGQYVR                      | 40.0<br>18.5        | 0.00 | 20 | 1 | 1 | 1 | 5.8  | WATLLPGDLGHTSTTEEDKAGQYVR                                                    | 19.9         |
| 468 | Tb927.7.6350   | NADH-ubiquinone oxidoreductase, mitochondrial, putative                             | 0.99 | 46 | 1  | 1 | 1 | 4.4  | SAIPLHLAQR                                                                   | 46.0                | 0.00 | 0  | 0 | 0 | 0 | 0.0  |                                                                              |              |
| 469 | Tb927.8.4930   | hypothetical protein, conserved                                                     | 1.00 | 63 | 4  | 1 | 1 | 5.3  | VITALPSSHAPSGASR                                                             | 45.4                | 0.98 | 43 | 2 | 1 | 1 | 5.3  | VITALPSSHAPSGASR                                                             | 38.8         |
| 470 | Tb927.1.90     | retrotransposon hot spot protein (RHS, pseudogene), putative                        | 0.93 | 46 | 2  | 2 | 2 | 6.3  | HVIGTFRGK<br>RRIDENVPPPPAAAAAQPQIR<br>VRDVLLEDALLQR                          | 14.2<br>37.5<br>8.4 | 1.00 | 49 | 2 | 1 | 1 | 2.2  | HVIGTFRGK<br>VRDVLLEDALLQR                                                   | 25.0<br>48.7 |
| 471 | Tb927.9.6920   | hypothetical protein, conserved                                                     | 0.97 | 36 | 2  | 1 | 1 | 7.2  | EGWKFFDPADPLGGAIVPEHALPKPR                                                   | 36.2                | 0.00 | 8  | 1 | 1 | 1 | 7.5  | REGVKFFDPADPLGGAIVPEHALPKPR                                                  | 7.9          |
| 472 | Tb927.6.4320   | hypothetical protein, conserved                                                     | 0.97 | 38 | 1  | 1 | 1 | 2.5  | AAILENAASR                                                                   | 37.6                | 0.00 | 0  | 0 | 0 | 0 | 0.0  |                                                                              |              |
| 473 | Tb927.7.6260   | hypothetical protein, conserved                                                     | 0.00 | 14 | 1  | 1 | 1 | 4.4  | AAYGLVWVANEIR                                                                | 14.4                | 0.98 | 42 | 1 | 1 | 1 | 4.4  | AAYGLVWVANEIR Deamidated (N10)                                               | 42.2         |
| 474 | Tb927.11.4920  | hypothetical protein, conserved                                                     | 0.99 | 63 | 5  | 2 | 2 | 12.9 | KAVTTADAPLPSCTFNTTVSR Carbamidomethyl (C13)<br>SRFPQRPWWTSTK                 | 15.9<br>34.6        | 0.00 | 0  | 0 | 0 | 0 | 0.0  |                                                                              |              |
| 475 | Tb927.11.15880 | hypothetical protein, conserved                                                     | 1.00 | 56 | 1  | 1 | 1 | 4.4  | TFQPELLGQAVSVNPKLFLWGTGVSVAQQALR                                             | 56.4                | 0.00 | 0  | 0 | 0 | 0 | 0.0  |                                                                              |              |
| 476 | Tb927.10.510   | hypothetical protein, conserved                                                     | 0.99 | 54 | 5  | 2 | 2 | 11.4 | DGGLPVTLEVPVQGR<br>LTAEVVLRFVYTHSDAGILR                                      | 34.0<br>7.2         | 1.00 | 63 | 3 | 2 | 2 | 11.4 | DGGLPVTLEVPVQGR<br>LTAEVVLRFVYTHSDAGILR                                      | 46.1<br>36.6 |
| 477 | Tb927.9.10520  | hypothetical protein, conserved                                                     | 0.98 | 64 | 6  | 2 | 2 | 9.9  | ALAWESRNEVR<br>TQYVQGFHQHLK                                                  | 18.8<br>29.8        | 0.91 | 35 | 3 | 1 | 1 | 4.7  | ALAWESRNEVR                                                                  | 29.4         |
| 478 | Tb927.10.15710 | mitochondrial carrier protein, putative                                             | 1.00 | 71 | 4  | 1 | 1 | 5.6  | HAPLVDVVAGGLGSAAK                                                            | 35.1                | 0.00 | 0  | 0 | 0 | 0 | 0.0  |                                                                              |              |
| 479 | Tb927.4.3840   | nucleolar protein, putative                                                         | 1.00 | 74 | 3  | 2 | 2 | 4.6  | NTGVFANDSEPR<br>TKSLNANLQR                                                   | 50.2<br>21.4        | 0.00 | 0  | 0 | 0 | 0 | 0.0  |                                                                              |              |
| 480 | Tb927.11.13890 | hypothetical protein, conserved                                                     | 1.00 | 65 | 3  | 1 | 1 | 5.6  | IAPOVTVETDVQSR                                                               | 54.9                | 0.00 | 0  | 0 | 0 | 0 | 0.0  |                                                                              |              |
| 481 | Tb927.7.5790   | protein disulfide isomerase, putative                                               | 1.00 | 50 | 2  | 1 | 1 | 7.4  | GYPTELLFAR                                                                   | 30.8                | 0.00 | 0  | 0 | 0 | 0 | 0.0  |                                                                              |              |
| 482 | Tb927.7.7260   | kinesin, putative                                                                   | 0.99 | 73 | 17 | 2 | 1 | 1.1  | DALRLQLDPPQ Deamidated (G6)<br>DALRLQLDPPQ Deamidated (G6)- Deamidated (G11) | 30.0<br>25.6        | 0.92 | 56 | 9 | 2 | 1 | 1.1  | DALRLQLDPPQ Deamidated (G6)<br>DALRLQLDPPQ Deamidated (G6)- Deamidated (G11) | 17.5<br>29.7 |
| 483 | Tb927.4.1280   | hypothetical protein, conserved                                                     | 0.96 | 40 | 2  | 1 | 1 | 4.5  | AIEATASETHPAAQLR                                                             | 24.7                | 0.00 | 0  | 0 | 0 | 0 | 0.0  |                                                                              |              |
| 484 | Tb927.3.2080   | hypothetical protein, conserved                                                     | 0.99 | 67 | 5  | 2 | 2 | 5.8  | AGRDPTLGL<br>ELAERKGRDPTLGL                                                  | 32.5<br>24.6        | 0.00 | 0  | 0 | 0 | 0 | 0.0  |                                                                              |              |
| 485 | Tb927.11.7520  | hypothetical protein, conserved                                                     | 0.99 | 46 | 2  | 1 | 1 | 3.3  | EIDDTVLLQSR                                                                  | 33.2                | 0.00 | 0  | 0 | 0 | 0 | 0.0  |                                                                              |              |
| 486 | Tb927.5.3900   | glutamine hydrolysing (not ammonia-dependent) carbonyl phosphate synthase, putative | 0.97 | 39 | 2  | 1 | 1 | 0.5  | ELVIDMVK Oxidation (M6)                                                      | 32.0                | 0.00 | 0  | 0 | 0 | 0 | 0.0  |                                                                              |              |
| 487 | Tb927.11.13310 | hypothetical protein, conserved                                                     | 1.00 | 56 | 2  | 1 | 1 | 6.0  | SVVNSGGGGAPASPTR                                                             | 30.6                | 0.00 | 10 | 1 | 1 | 1 | 6.0  | SVVNSGGGGAPASPTR                                                             | 10.4         |
| 488 | Tb927.7.7210   | hypothetical protein, conserved                                                     | 0.00 | 9  | 1  | 1 | 1 | 2.7  | ACGPLTDELADLVDFWK Carbamidomethyl (C2)                                       | 8.7                 | 1.00 | 84 | 4 | 1 | 1 | 2.7  | ACGPLTDELADLVDFWK Carbamidomethyl (C2)                                       | 34.6         |
| 489 | Tb927.11.16750 | hypothetical protein, conserved                                                     | 1.00 | 74 | 9  | 2 | 2 | 15.4 | LGGQAMTPAQGTGVKMPGQSS Oxidation (M6)- Oxidation (M17)<br>GGGAPLGVTDVNLK      | 26.2<br>22.7        | 0.00 | 17 | 1 | 1 | 1 | 6.0  | GGGAPLGVTDVNLK                                                               | 17.2         |
| 490 | Tb927.10.830   | adenylate kinase, putative                                                          | 1.00 | 84 | 3  | 1 | 1 | 5.0  | AVTADLVKTESR                                                                 | 67.9                | 0.00 | 0  | 0 | 0 | 0 | 0.0  |                                                                              |              |
| 491 | Tb927.7.6990   | hypothetical protein, conserved                                                     | 0.97 | 64 | 6  | 2 | 2 | 9.0  | ELCEGRDLKAGER Carbamidomethyl (C3)<br>KGPVAVHSLPVYK                          | 28.4<br>27.7        | 0.00 | 0  | 0 | 0 | 0 | 0.0  |                                                                              |              |
| 492 | Tb927.11.5250  | hypothetical protein, conserved                                                     | 1.00 | 82 | 5  | 2 | 2 | 1.5  | RQDVGWELLR                                                                   | 41.4                | 0.00 | 0  | 0 | 0 | 0 | 0.0  |                                                                              |              |
| 493 | Tb927.10.8980  | hypothetical protein, conserved                                                     | 0.97 | 39 | 5  | 1 | 1 | 7.1  | TPLFVGNAAASR                                                                 | 28.8                | 0.00 | 0  | 0 | 0 | 0 | 0.0  |                                                                              |              |
| 494 | Tb927.11.12040 | hypothetical protein, conserved                                                     | 0.96 | 37 | 4  | 1 | 1 | 13.2 | TGRLLMPDPLFNPPIHMANFR Oxidation (M6)- Oxidation (M17)                        | 31.3                | 0.00 | 0  | 0 | 0 | 0 | 0.0  |                                                                              |              |
| 495 | Tb927.11.540   | ABC transporter, putative                                                           | 0.70 | 30 | 1  | 1 | 1 | 4.1  | SPGILLDEATSDLDSEIVHEAVSR                                                     | 30.0                | 1.00 | 80 | 4 | 1 | 1 | 4.1  | SPGILLDEATSDLDSEIVHEAVSR                                                     | 60.9         |
| 496 | Tb927.11.6430  | hypothetical protein, conserved                                                     | 0.98 | 65 | 4  | 2 | 2 | 2.9  | AVSPVGVYSSINGAGVSLPR<br>LAPLSASTLRPAK                                        | 32.7<br>17.6        | 0.00 | 11 | 2 | 1 | 1 | 1.1  | LAPLSASTLRPAK                                                                | 9.1          |
| 497 | Tb927.1.3450   | hypothetical protein, conserved                                                     | 1.00 | 79 | 2  | 1 | 1 | 1.6  | ALVALQGLCNDAR Carbamidomethyl (C9)                                           | 73.9                | 0.00 | 0  | 0 | 0 | 0 | 0.0  |                                                                              |              |
| 498 | Tb927.8.6640   | hypothetical protein, conserved                                                     | 1.00 | 78 | 6  | 1 | 1 | 3.0  | STAASTAQGLNPLTAAK                                                            | 54.3                | 0.00 | 0  | 0 | 0 | 0 | 0.0  |                                                                              |              |
| 499 | Tb927.11.610   | hypothetical protein, conserved                                                     | 1.00 | 75 | 2  | 2 | 2 | 10.7 | FLPGVGHPTYSCK Carbamidomethyl (C13)<br>FSPESPHEVAPLPLPLTQRR                  | 36.1<br>39.2        | 0.00 | 0  | 0 | 0 | 0 | 0.0  |                                                                              |              |
| 500 | Tb927.8.1870   | Golgi lysosome glycoprotein 1                                                       | 1.00 | 44 | 4  | 1 | 1 | 5.0  | FVSDTEDCDASAAGVPELTALEPEDRFQPK Carbamidomethyl (C8)                          | 37.9                | 0.00 | 9  | 1 | 1 | 1 | 5.0  | FVSDTEDCDASAAGVPELTALEPEDRFQPK Carbamidomethyl (C8)                          | 9.2          |
| 501 | Tb927.8.6050   | hypothetical protein, conserved                                                     | 1.00 | 77 | 4  | 1 | 1 | 11.1 | AVISPQEKPLTSSSSGALGGSGNEVKK                                                  | 54.5                | 0.00 | 0  | 0 | 0 | 0 | 0.0  |                                                                              |              |
| 502 | Tb927.6.2870   | hypothetical protein, conserved                                                     | 0.99 | 67 | 3  | 2 | 1 | 2.8  | GFNAEQTTDASR<br>GFNAEQTTDASR Deamidated (N4)                                 | 18.6<br>34.0        | 0.97 | 41 | 3 | 1 | 1 | 2.8  | GFNAEQTTDASR                                                                 | 29.2         |
| 503 | Tb927.8.630    | hypothetical protein, conserved                                                     | 0.96 | 38 | 1  | 1 | 1 | 3.6  | TGAEALFFALDPASNPGEELPLIGR                                                    | 37.6                | 1.00 | 66 | 3 | 1 | 1 | 3.6  | TGAEALFFALDPASNPGEELPLIGR                                                    | 44.3         |
| 504 | Tb927.7.4290   | hypothetical protein, conserved                                                     | 1.00 | 52 | 4  | 1 | 1 | 4.0  | AAAQAAEAANKR                                                                 | 42.4                | 0.00 | 0  | 0 | 0 | 0 | 0.0  |                                                                              |              |
| 505 | Tb927.5.4040   | hypothetical protein, conserved                                                     | 0.80 | 29 | 4  | 1 | 1 | 2.3  | RLVEPQLRPOATDALLAR                                                           | 26.8                | 0.99 | 38 | 4 | 1 | 1 | 2.3  | RLVEPQLRPOATDALLAR                                                           | 20.4         |
| 506 | Tb927.10.12960 | ras-related protein rab-5 small GTPase, putative                                    | 1.00 | 76 | 2  | 1 | 1 | 8.7  | LLLEHGLGANGSGPGLSGPR                                                         | 40.5                | 1.00 | 72 | 2 | 1 | 1 | 8.7  | LLLEHGLGANGSGPGLSGPR                                                         | 55.7         |
| 507 | Tb927.10.2950  | malate dehydrogenase-related                                                        | 1.00 | 69 | 7  | 1 | 1 | 6.2  | AAPHAVGIASGPNVLSVPLAR                                                        | 57.6                | 1.00 | 61 | 1 | 1 | 1 | 6.2  | AAPHAVGIASGPNVLSVPLAR                                                        | 60.8         |
| 508 | Tb927.3.1820   | hypothetical protein, conserved                                                     | 0.29 | 24 | 1  | 1 | 1 | 7.8  | ANPSDGLVYVAATPLAYOK                                                          | 24.2                | 1.00 | 59 | 4 | 1 | 1 | 7.8  | ANPSDGLVYVAATPLAYOK                                                          | 32.6         |
| 509 | Tb927.6.3670   | parafagellar rod component, putative                                                | 1.00 | 50 | 3  | 1 | 1 | 0.6  | AVPIAAHAFDPLPAPFLR                                                           | 42.3                | 0.00 | 16 | 1 | 1 | 1 | 0.6  | AVPIAAHAFDPLPAPFLR                                                           | 15.7         |
| 510 | Tb927.5.1680   | hypothetical protein, conserved                                                     | 1.00 | 72 | 9  | 1 | 1 | 1.3  | AAAAAAAIVEESGIAGVEETLRR                                                      | 43.0                | 0.00 | 0  | 0 | 0 | 0 | 0.0  |                                                                              |              |
| 511 | Tb927.8.4450   | RNA-binding protein, putative                                                       | 0.98 | 43 | 1  | 1 | 1 | 4.7  | STVSSSSVATVPSNVSGK                                                           | 42.9                | 0.00 | 0  | 0 | 0 | 0 | 0.0  |                                                                              |              |

Peptides

|     |                |                                                                                        |      |    |   |   |   |      |                                                                    |      |      |     |   |   |   |      |                                                                                                                        |                      |
|-----|----------------|----------------------------------------------------------------------------------------|------|----|---|---|---|------|--------------------------------------------------------------------|------|------|-----|---|---|---|------|------------------------------------------------------------------------------------------------------------------------|----------------------|
| 512 | Tb927.6.4080   | hypothetical protein, conserved                                                        | 0.99 | 44 | 1 | 1 | 1 | 0.8  | TILGPGGGFAGEER                                                     | 44.0 | 0.00 | 0   | 0 | 0 | 0 | 0.0  |                                                                                                                        |                      |
| 513 | Tb927.6.1870   | eukaryotic translation initiation factor 4e, putative                                  | 1.00 | 71 | 3 | 1 | 1 | 3.0  | AATNAAMALWKEK                                                      | 51.7 | 0.00 | 0   | 0 | 0 | 0 | 0.0  |                                                                                                                        |                      |
| 514 | Tb927.11.6660  | hypothetical protein, conserved                                                        | 1.00 | 64 | 4 | 1 | 1 | 2.3  | VAAASVGGATPVTSFOTPTER                                              | 51.7 | 0.00 | 0   | 0 | 0 | 0 | 0.0  |                                                                                                                        |                      |
| 515 | Tb927.9.14420  | cyclophilin-like protein, putative                                                     | 1.00 | 51 | 3 | 1 | 1 | 3.7  | RLRLTLIEEVPLPR                                                     | 37.9 | 0.00 | 9   | 1 | 1 | 1 | 3.7  | RLRLTLIEEVPLPR                                                                                                         | 9.2                  |
| 516 | Tb927.10.9820  | mitochondrial intermediate peptidase, putative.metallo-peptidase, Clan MA(E) Family M3 | 0.98 | 43 | 2 | 1 | 1 | 2.8  | SACVTDVEEIPFLSLSK Carbamidomethyl (C3)                             | 41.1 | 0.00 | 17  | 1 | 1 | 1 | 2.8  | SACVTDVEEIPFLSLSK Carbamidomethyl (C3)                                                                                 | 16.5                 |
| 517 | Tb927.11.10960 | hypothetical protein, conserved                                                        | 1.00 | 67 | 3 | 1 | 1 | 3.4  | SGGLGEGELGSSPHHLSLEQYR                                             | 41.4 | 0.00 | 0   | 0 | 0 | 0 | 0.0  |                                                                                                                        |                      |
| 518 | Tb927.11.8800  | hypothetical protein, conserved                                                        | 1.00 | 57 | 2 | 1 | 1 | 5.1  | TIVLIGKPEDVYVR                                                     | 55.3 | 0.00 | 0   | 0 | 0 | 0 | 0.0  |                                                                                                                        |                      |
| 519 | Tb927.5.2530   | hypothetical protein, conserved                                                        | 0.98 | 39 | 2 | 1 | 1 | 1.1  | PPPTSVASTAR                                                        | 24.4 | 0.99 | 44  | 3 | 1 | 1 | 1.1  | PPPTSVASTAR                                                                                                            | 33.1                 |
| 520 | Tb927.5.3390   | ADG1, pseudogene                                                                       | 1.00 | 65 | 4 | 1 | 1 | 9.3  | RLELQNVVEQTR                                                       | 58.9 | 0.00 | 0   | 0 | 0 | 0 | 0.0  |                                                                                                                        |                      |
| 521 | Tb927.7.5680   | deoxyribose-phosphate aldolase, putative                                               | 1.00 | 64 | 2 | 1 | 1 | 5.0  | QGFTGKLDALLER                                                      | 43.9 | 0.00 | 0   | 0 | 0 | 0 | 0.0  |                                                                                                                        |                      |
| 522 | Tb927.10.6610  | chaperone protein DNAj, putative                                                       | 1.00 | 58 | 2 | 1 | 1 | 4.4  | NVVOQQEQLAR                                                        | 54.7 | 0.00 | 0   | 0 | 0 | 0 | 0.0  |                                                                                                                        |                      |
| 523 | Tb927.11.9580  | oxidoreductase, putative                                                               | 1.00 | 63 | 1 | 1 | 1 | 2.9  | LVVGLSIESPALLLR Carbamidomethyl (C4)                               | 63.2 | 0.00 | 0   | 0 | 0 | 0 | 0.0  |                                                                                                                        |                      |
| 524 | Tb927.10.3640  | hypothetical protein, conserved                                                        | 1.00 | 62 | 2 | 1 | 1 | 3.9  | YATGKPKITAK                                                        | 56.6 | 0.76 | 41  | 2 | 1 | 1 | 3.9  | YATGKPKITAK                                                                                                            | 36.4                 |
| 525 | Tb927.6.4070   | hypothetical protein, conserved                                                        | 1.00 | 56 | 2 | 1 | 1 | 7.7  | DYPQVFGGSPSTSYVPATAH                                               | 50.8 | 0.00 | 0   | 0 | 0 | 0 | 0.0  |                                                                                                                        |                      |
| 526 | Tb927.11.7100  | hypothetical protein, conserved                                                        | 1.00 | 48 | 2 | 1 | 1 | 4.9  | VLSSSHGAR                                                          | 40.6 | 0.00 | 0   | 0 | 0 | 0 | 0.0  |                                                                                                                        |                      |
| 527 | Tb927.11.1680  | vesicular-fusion protein SEC18, putative                                               | 1.00 | 44 | 2 | 1 | 1 | 1.0  | AAVSHALLR                                                          | 25.3 | 0.53 | 31  | 1 | 1 | 1 | 1.0  | AAVSHALLR                                                                                                              | 30.6                 |
| 528 | Tb927.8.5860   | 50S ribosomal protein L17, putative                                                    | 1.00 | 60 | 1 | 1 | 1 | 3.7  | ILADHVVELAK                                                        | 59.9 | 0.00 | 0   | 0 | 0 | 0 | 0.0  |                                                                                                                        |                      |
| 529 | Tb927.10.14770 | protein kinase, putative                                                               | 0.99 | 47 | 2 | 1 | 1 | 2.2  | LANSLPVVHTSTR                                                      | 30.5 | 0.00 | 0   | 0 | 0 | 0 | 0.0  |                                                                                                                        |                      |
| 530 | Tb927.7.4460   | hypothetical protein, conserved                                                        | 1.00 | 60 | 4 | 1 | 1 | 2.0  | SQTIPGAADTPWAAR                                                    | 42.2 | 0.00 | 0   | 0 | 0 | 0 | 0.0  |                                                                                                                        |                      |
| 531 | Tb927.2.2160   | parafagellar rod component, putative                                                   | 0.59 | 28 | 2 | 1 | 1 | 5.2  | SSSTYVDVWFENLIER                                                   | 23.4 | 0.99 | 47  | 1 | 1 | 1 | 5.2  | SSSTYVDVWFENLIER                                                                                                       | 46.6                 |
| 532 | Tb927.10.360   | hypothetical protein, conserved                                                        | 1.00 | 56 | 2 | 1 | 1 | 5.0  | VVPVAGQATFEAR                                                      | 44.2 | 0.00 | 0   | 0 | 0 | 0 | 0.0  |                                                                                                                        |                      |
| 533 | Tb927.7.1090   | hypothetical protein, conserved                                                        | 1.00 | 56 | 2 | 1 | 1 | 1.8  | FATSATNOGGLVKPSPSSVMAAQR                                           | 55.6 | 0.00 | 0   | 0 | 0 | 0 | 0.0  |                                                                                                                        |                      |
| 534 | Tb927.11.8030  | hypothetical protein, conserved                                                        | 1.00 | 56 | 1 | 1 | 1 | 2.6  | ILDYSHVGLHR                                                        | 55.7 | 0.00 | 0   | 0 | 0 | 0 | 0.0  |                                                                                                                        |                      |
| 535 | Tb927.8.3050   | hypothetical protein, conserved                                                        | 1.00 | 55 | 2 | 1 | 1 | 2.1  | VGLGTGAQQLAR                                                       | 35.6 | 0.00 | 0   | 0 | 0 | 0 | 0.0  |                                                                                                                        |                      |
| 536 | Tb927.11.10080 | hypothetical protein, conserved                                                        | 1.00 | 55 | 1 | 1 | 1 | 13.2 | FRVQPLPSLHANSIADDTPLVTTTR                                          | 55.1 | 0.00 | 0   | 0 | 0 | 0 | 0.0  |                                                                                                                        |                      |
| 537 | Tb927.11.10210 | hypothetical protein, conserved                                                        | 0.99 | 45 | 2 | 1 | 1 | 1.0  | LISLASSAGR                                                         | 40.0 | 0.00 | 0   | 0 | 0 | 0 | 0.0  |                                                                                                                        |                      |
| 538 | Tb927.6.5090   | hypothetical protein, conserved                                                        | 1.00 | 54 | 2 | 1 | 1 | 1.7  | AALGTEGVLSR                                                        | 44.1 | 0.00 | 0   | 0 | 0 | 0 | 0.0  |                                                                                                                        |                      |
| 539 | Tb927.11.460   | hypothetical protein, conserved,predicted WD40 repeat protein                          | 0.99 | 41 | 5 | 1 | 1 | 1.0  | SLVANKPR                                                           | 31.7 | 0.00 | 0   | 0 | 0 | 0 | 0.0  |                                                                                                                        |                      |
| 540 | Tb927.11.11290 | cytosolic malate dehydrogenase                                                         | 0.99 | 47 | 1 | 1 | 1 | 6.7  | VWVTGAAGQIGYSLPLAAGR                                               | 47.0 | 0.26 | 24  | 1 | 1 | 1 | 6.7  | VWVTGAAGQIGYSLPLAAGR                                                                                                   | 23.5                 |
| 541 | Tb927.6.1950   | hypothetical protein, conserved,leucine-rich repeat protein (LRRP), putative           | 0.99 | 45 | 4 | 1 | 1 | 2.6  | ALGAHPTLR                                                          | 33.9 | 0.00 | 0   | 0 | 0 | 0 | 0.0  |                                                                                                                        |                      |
| 542 | Tb927.7.540    | chaperone protein DNAj, putative                                                       | 1.00 | 46 | 2 | 1 | 1 | 5.3  | AAALQNHPDHAKPEAEQAQAQR                                             | 45.2 | 0.00 | 0   | 0 | 0 | 0 | 0.0  |                                                                                                                        |                      |
| 543 | Tb927.7.5320   | hypothetical protein, conserved                                                        | 1.00 | 53 | 2 | 1 | 1 | 2.0  | EAPLVLVSTWAEKLR                                                    | 47.4 | 0.00 | 0   | 0 | 0 | 0 | 0.0  |                                                                                                                        |                      |
| 544 | Tb927.10.14720 | peroxin 13                                                                             | 1.00 | 53 | 4 | 1 | 1 | 2.6  | KGLVPGNLR                                                          | 41.4 | 0.00 | 0   | 0 | 0 | 0 | 0.0  |                                                                                                                        |                      |
| 545 | Tb927.4.1600   | hypothetical protein, conserved                                                        | 1.00 | 52 | 1 | 1 | 1 | 5.1  | VLLVMPGSGK Oxidation (M7)                                          | 51.6 | 0.00 | 0   | 0 | 0 | 0 | 0.0  |                                                                                                                        |                      |
| 546 | Tb927.9.3370   | thioredoxin                                                                            | 0.98 | 44 | 1 | 1 | 1 | 10.3 | VLQLPTFIAR                                                         | 44.0 | 0.00 | 0   | 0 | 0 | 0 | 0.0  |                                                                                                                        |                      |
| 547 | Tb927.10.10800 | hypothetical protein, conserved                                                        | 1.00 | 46 | 2 | 1 | 1 | 7.7  | GVCNVYHLSQVSSHVGSLLGQTFPTAVPLTSPTPV Carbamidomethyl (C3)           | 34.8 | 0.44 | 27  | 1 | 1 | 1 | 7.7  | GVCNVYHLSQVSSHVGSLLGQTFPTAVPLTSPTPV Carbamidomethyl (C3)                                                               | 26.9                 |
| 548 | Tb927.7.3810   | hypothetical protein, conserved                                                        | 1.00 | 49 | 3 | 1 | 1 | 3.7  | ALGFAADSKPAAAR                                                     | 38.8 | 0.00 | 0   | 0 | 0 | 0 | 0.0  |                                                                                                                        |                      |
| 549 | Tb927.10.7700  | ABC transporter, putative                                                              | 1.00 | 48 | 2 | 1 | 1 | 2.1  | VILHLITGALPSR                                                      | 32.6 | 0.00 | 0   | 0 | 0 | 0 | 0.0  |                                                                                                                        |                      |
| 550 | Tb927.8.8120   | hypothetical protein, conserved                                                        | 0.99 | 48 | 1 | 1 | 1 | 6.3  | GGGPSAVCEENLCTAR Carbamidomethyl (C8)- Carbamidomethyl (C14)       | 47.6 | 0.49 | 27  | 1 | 1 | 1 | 6.3  | GGGPSAVCEENLCTAR Carbamidomethyl (C8)- Carbamidomethyl (C14)                                                           | 26.9                 |
| 551 | Tb927.7.2670   | hypothetical protein, conserved,zinc finger protein family member, putative            | 0.99 | 44 | 2 | 1 | 1 | 2.2  | FVQGHGIVPR                                                         | 40.0 | 0.00 | 0   | 0 | 0 | 0 | 0.0  |                                                                                                                        |                      |
| 552 | Tb927.9.10070  | hypothetical protein, conserved                                                        | 1.00 | 48 | 1 | 1 | 1 | 4.4  | CVAALEEPVFFRN Carbamidomethyl (C1)                                 | 48.3 | 0.00 | 0   | 0 | 0 | 0 | 0.0  |                                                                                                                        |                      |
| 553 | Tb927.10.15950 | TFIID-like protein, putative                                                           | 1.00 | 48 | 1 | 1 | 1 | 5.3  | AAGASGVYDAAPK                                                      | 48.0 | 0.00 | 0   | 0 | 0 | 0 | 0.0  |                                                                                                                        |                      |
| 554 | Tb927.5.1160   | hypothetical protein, conserved                                                        | 1.00 | 48 | 4 | 1 | 1 | 9.2  | NFLIEDRGLTQGGQEKADFVR Carbamidomethyl (C10)- Carbamidomethyl (C13) | 42.5 | 0.00 | 0   | 0 | 0 | 0 | 0.0  |                                                                                                                        |                      |
| 555 | Tb927.6.2720   | calcium-binding protein, putative                                                      | 1.00 | 48 | 1 | 1 | 1 | 3.1  | VSGEADALKR                                                         | 48.0 | 0.00 | 0   | 0 | 0 | 0 | 0.0  |                                                                                                                        |                      |
| 556 | Tb927.11.15240 | small GTPase, putative,ras-related protein rab-2a, putative                            | 1.00 | 46 | 1 | 1 | 1 | 14.6 | TAMMIYDNVIEGVDAGAVSGKQGTGPGVAR Oxidation (M4)                      | 46.3 | 0.00 | 0   | 0 | 0 | 0 | 0.0  |                                                                                                                        |                      |
| 557 | Tb927.10.600   | hypothetical protein, conserved                                                        | 0.00 | 0  | 0 | 0 | 0 | 0.0  |                                                                    |      | 1.00 | 90  | 3 | 2 | 2 | 7.2  | APSHGALLDDVPHQEAWR<br>FAGEANEESTLDVLENFGR                                                                              | 29.6<br>46.7         |
| 558 | Tb927.9.15060  | rRNA processing protein, putative                                                      | 0.00 | 0  | 0 | 0 | 0 | 0.0  |                                                                    |      | 0.99 | 64  | 2 | 2 | 1 | 13.9 | MALSTKPLPSDLNADDPKREAFIQGALLSVR<br>MALSTKPLPSDLNADDPKREAFIQGALLSVR Oxidation (M1)                                      | 29.1<br>35.0         |
| 559 | Tb927.9.5040   | cAMP-specific phosphodiesterase                                                        | 0.00 | 0  | 0 | 0 | 0 | 0.0  |                                                                    |      | 1.00 | 136 | 5 | 3 | 3 | 8.3  | ERFPFGQGIAGTVAASGVGENIQDVAQDPR Carbamidomethyl (C8)<br>GGIGFIDFVAAPFFOK Deamidated (O15)<br>TYHNNPDVLAQPHDTAALIDETAIGK | 52.7<br>30.0<br>35.0 |
| 560 | Tb927.8.4500   | eukaryotic translation initiation factor 4 gamma, putative                             | 0.00 | 0  | 0 | 0 | 0 | 0.0  |                                                                    |      | 1.00 | 108 | 4 | 2 | 2 | 5.1  | IQFLLNTLETDDNNVWR<br>YSPRLLSGTVDSESDILR                                                                                | 36.6<br>37.2         |
| 561 | Tb927.9.5280   | hypothetical protein, conserved                                                        | 0.00 | 0  | 0 | 0 | 0 | 0.0  |                                                                    |      | 1.00 | 73  | 4 | 1 | 1 | 18.3 | LSPATESPQSGTASGDPEPTDVEGETTVDDIEIALEALEALEREQGGK                                                                       | 42.8                 |
| 562 | Tb927.2.4090   | hypothetical protein, conserved                                                        | 0.00 | 0  | 0 | 0 | 0 | 0.0  |                                                                    |      | 1.00 | 45  | 3 | 1 | 1 | 14.1 | KFSANFQVVPVQVDSISFVGPEDQVYVPEVREFATS                                                                                   | 40.0                 |
| 563 | Tb927.8.4890   | endoplasmic reticulum oxidoreductin, putative,pol-associated gene 1                    | 0.00 | 0  | 0 | 0 | 0 | 0.0  |                                                                    |      | 1.00 | 59  | 1 | 1 | 1 | 7.7  | GFEDEKPIDPORDATYVDLONPEANTGYSGPK                                                                                       | 58.6                 |
| 564 | Tb927.10.790   | vesicle-associated membrane protein, putative,synaptobrevin, putative                  | 0.00 | 0  | 0 | 0 | 0 | 0.0  |                                                                    |      | 1.00 | 56  | 1 | 1 | 1 | 6.7  | KAVDEKVEIALDNVER                                                                                                       | 56.0                 |
| 565 | Tb927.11.3240  | T-complex protein 1, zeta subunit, putative                                            | 0.00 | 0  | 0 | 0 | 0 | 0.0  |                                                                    |      | 1.00 | 113 | 5 | 3 | 3 | 5.7  | LDTGSVDPLAAGLDNLVYK<br>LDTGSVDPLAAGLDNLVLR<br>YDQGLHR                                                                  | 39.9<br>35.6<br>34.7 |
| 566 | Tb927.11.10170 | hypothetical protein, conserved                                                        | 0.00 | 0  | 0 | 0 | 0 | 0.0  |                                                                    |      | 1.00 | 49  | 5 | 1 | 1 | 12.2 | RGPSGLNNNELIDAWKEFDVSPRLR                                                                                              | 28.7                 |
