# Supplementary material for: Proteomic Analysis of the Acidocalcisome, an Organelle Conserved from Bacteria to Human Cells
Source: PubMed Central journal article supplement (PMC4263762; doi:10.1371/journal.ppat.1004555), 2014-12-11
Supplement: ppat.1004555.s013.pdf [file ppat.1004555.s013.pdf]

**Table S3.** Signal peptide (SP) and transmembrane domain (TMD) predictions of high confidence protein identifications (1% false discovery rate, protein probability  $\geq 0.95$ ) from *T. brucei* acidocalcisome datasets (ACCS1 and ACCS2). Predictions of TMD and SP for individual proteins were based on consensus of two or more algorithms. If the predicted number of TMD varied among the different predictions packages, we report the median number of TMD. If a protein group contained more than one protein hit (see Methods for explanation of protein grouping based on degenerate peptide fingerprints), the number of TMD and presence of SP were assigned if predicted in at least two members.

| Protein Group | GeneID         | Description                                                                                       | Group Consensus |                 | TMHMM 2.1<br># of TMD | HMMTOP 2.1<br># of TMD | SignalP 4.1<br>Signal Peptide? | Polyphobius |                 | Individual Consensus |                 |
|---------------|----------------|---------------------------------------------------------------------------------------------------|-----------------|-----------------|-----------------------|------------------------|--------------------------------|-------------|-----------------|----------------------|-----------------|
|               |                |                                                                                                   | # of TMD        | Signal Peptide? |                       |                        |                                | # of TMD    | Signal Peptide? | TM                   | Signal Peptide? |
| 1             | Tb927.6.3740   | heat shock 70 kDa protein, mitochondrial precursor, putative                                      |                 |                 |                       |                        |                                |             |                 |                      |                 |
|               | Tb927.6.3750   | heat shock 70 kDa protein, mitochondrial precursor, putative                                      |                 |                 |                       |                        |                                |             |                 |                      |                 |
|               | Tb927.6.3800   | heat shock 70 kDa protein, mitochondrial precursor, putative                                      |                 |                 |                       |                        |                                |             |                 |                      |                 |
| 2             | Tb927.11.6280  | pyruvate phosphate dikinase                                                                       |                 |                 |                       |                        |                                |             |                 |                      |                 |
| 3             | Tb927.1.2330   | beta tubulin                                                                                      |                 |                 |                       |                        |                                |             |                 |                      |                 |
|               | Tb927.1.2350   | beta tubulin                                                                                      |                 |                 |                       |                        |                                |             |                 |                      |                 |
|               | Tb927.1.2370   | beta tubulin                                                                                      |                 |                 |                       |                        |                                |             |                 |                      |                 |
|               | Tb927.1.2390   | beta tubulin                                                                                      |                 |                 |                       |                        |                                |             |                 |                      |                 |
| 4             | Tb927.10.6400  | chaperonin HSP60, mitochondrial precursor                                                         |                 |                 |                       | 1                      |                                |             |                 |                      |                 |
|               | Tb927.10.6510  | chaperonin HSP60, mitochondrial precursor                                                         |                 |                 |                       | 1                      |                                |             |                 |                      |                 |
| 5             | Tb927.3.1380   | ATP synthase beta chain, mitochondrial precursor,ATP synthase F1, beta subunit                    |                 |                 |                       | 1                      |                                |             | Y               |                      |                 |
| 6             | Tb927.2.4210   | glycosomal phosphoenolpyruvate carboxykinase                                                      |                 |                 |                       |                        |                                |             |                 |                      |                 |
| 7             | Tb927.11.7460  | glucose-regulated protein 78, putative,luminal binding protein 1 (BIP), putative                  |                 | Y               |                       | 1                      | Y                              |             | Y               |                      | Y               |
|               | Tb927.11.7510  | glucose-regulated protein 78, putative,luminal binding protein 1 (BIP), putative                  |                 |                 |                       | 1                      | Y                              |             | Y               |                      | Y               |
| 8             | Tb927.10.5620  | fructose-bisphosphate aldolase, glycosomal                                                        |                 |                 |                       |                        |                                |             |                 |                      |                 |
| 9             | Tb927.1.2340   | alpha tubulin                                                                                     |                 |                 |                       |                        |                                |             |                 |                      |                 |
|               | Tb927.1.2360   | alpha tubulin                                                                                     |                 |                 |                       |                        |                                |             |                 |                      |                 |
|               | Tb927.1.2380   | alpha tubulin                                                                                     |                 |                 |                       |                        |                                |             |                 |                      |                 |
|               | Tb927.1.2400   | alpha tubulin                                                                                     |                 |                 |                       |                        |                                |             |                 |                      |                 |
| 10            | Tb927.6.4280   | glyceraldehyde 3-phosphate dehydrogenase, glycosomal                                              |                 |                 |                       |                        |                                |             |                 |                      |                 |
|               | Tb927.6.4300   | glyceraldehyde 3-phosphate dehydrogenase, glycosomal                                              |                 |                 |                       |                        |                                |             |                 |                      |                 |
| 11            | Tb927.8.3530   | glycerol-3-phosphate dehydrogenase [NAD ], glycosomal                                             |                 |                 |                       | 1                      |                                |             | Y               |                      |                 |
| 12            | Tb927.11.11330 | heat shock protein 70                                                                             |                 |                 |                       |                        |                                |             |                 |                      |                 |
| 13            | Tb927.11.9980  | 2-oxoglutarate dehydrogenase E1 component, putative                                               |                 |                 |                       |                        |                                |             | Y               |                      |                 |
| 14            | Tb927.10.15410 | glycosomal malate dehydrogenase                                                                   |                 |                 |                       | 4                      |                                |             | Y               |                      |                 |
| 15            | Tb927.9.12570  | glycerol kinase, glycosomal                                                                       |                 |                 |                       | 1                      |                                |             |                 |                      |                 |
| 16            | Tb927.5.930    | NADH-dependent fumarate reductase                                                                 |                 |                 |                       |                        |                                |             |                 |                      |                 |
| 17            | Tb927.11.3980  | mitochondrial processing peptidase alpha subunit, putative,metallo-peptidase, Clan ME, Family M16 |                 |                 |                       | 1                      |                                |             | Y               |                      |                 |
| 18            | Tb927.2.4230   | NUP-1 protein, putative                                                                           |                 |                 |                       |                        |                                |             |                 |                      |                 |
| 19            | Tb927.3.2230   | succinyl-CoA synthetase alpha subunit, putative                                                   |                 |                 |                       |                        |                                |             |                 |                      |                 |
| 20            | Tb927.5.1060   | mitochondrial processing peptidase, beta subunit, putative,metallo-peptidase, Clan ME, Family M16 |                 |                 |                       |                        |                                |             |                 |                      |                 |
| 21            | Tb927.11.5520  | triosephosphate isomerase                                                                         |                 |                 |                       | 2                      |                                |             |                 |                      |                 |
| 22            | Tb927.4.2070   | antigenic protein, putative                                                                       |                 |                 |                       |                        |                                |             |                 |                      |                 |
| 23            | Tb927.11.11680 | 2-oxoglutarate dehydrogenase E2 component, putative                                               |                 |                 |                       | 1                      |                                |             | Y               |                      |                 |
| 24            | Tb927.10.8030  | hypothetical protein, conserved                                                                   |                 |                 |                       |                        |                                |             |                 |                      |                 |
| 25            | Tb927.10.7410  | succinyl-CoA ligase [GDP-forming] beta-chain, putative-with=GeneDB:LmjF36.2950                    |                 |                 |                       | 1                      |                                |             |                 |                      |                 |
| 26            | Tb927.9.5900   | glutamate dehydrogenase                                                                           |                 |                 |                       |                        |                                |             | Y               |                      |                 |
| 27            | Tb927.5.2930   | hypothetical protein, conserved                                                                   |                 |                 |                       | 1                      |                                |             |                 |                      |                 |
| 28            | Tb927.5.2080   | guanosine monophosphate reductase, putative                                                       |                 |                 |                       | 1                      |                                |             |                 |                      |                 |
| 29            | Tb927.9.5320   | nucleolar RNA binding protein, putative                                                           | 1               |                 | 1                     | 1                      |                                |             |                 | 1                    |                 |
| 30            | Tb927.8.2770   | inositol 1,4,5-trisphosphate receptor                                                             | 5               |                 | 5                     | 5                      |                                |             | 7               |                      | 5               |
| 31            | Tb927.10.3210  | delta-1-pyrroline-5-carboxylate dehydrogenase, putative                                           |                 |                 |                       |                        |                                |             |                 |                      |                 |
| 32            | Tb927.11.1020  | ribokinase, putative                                                                              |                 |                 |                       |                        |                                |             | Y               |                      |                 |
| 33            | Tb927.11.2690  | succinyl-coA:3-ketoacid-coenzyme A transferase, mitochondrial precursor, putative                 |                 |                 |                       |                        |                                |             |                 |                      |                 |
| 34            | Tb927.11.1450  | 2-oxoglutarate dehydrogenase E1 component, putative                                               |                 |                 |                       |                        |                                |             | Y               |                      |                 |
| 35            | Tb927.10.14820 | mitochondrial carrier protein, putative,ADP/ATP translocase 1, putative                           | 3               |                 | 3                     | 4                      |                                |             | 2               |                      | 3               |
|               | Tb927.10.14830 | mitochondrial carrier protein, putative,ADP/ATP translocase 1, putative                           |                 |                 | 3                     | 4                      |                                |             | 2               |                      | 3               |
|               | Tb927.10.14840 | mitochondrial carrier protein, putative,ADP/ATP translocase 1, putative                           |                 |                 | 3                     | 4                      |                                |             | 2               |                      | 3               |
| 36            | Tb927.10.14550 | ATP-dependent DEAD/H RNA helicase, putative                                                       |                 | Y               |                       |                        | Y                              |             |                 |                      | Y               |
| 37            | Tb927.10.2090  | elongation factor 1-alpha,EF-1-alpha                                                              |                 |                 |                       |                        |                                |             |                 |                      |                 |
|               | Tb927.10.2100  | elongation factor 1-alpha,EF-1-alpha                                                              |                 |                 |                       |                        |                                |             |                 |                      |                 |
|               | Tb927.10.2110  | elongation factor 1-alpha                                                                         |                 |                 |                       |                        |                                |             |                 |                      |                 |
| 38            | Tb927.7.7420   | ATP synthase alpha chain, mitochondrial precursor,ATP synthase F1, alpha subunit                  |                 | Y               |                       | 1                      | Y                              |             | Y               |                      | Y               |
|               | Tb927.7.7430   | ATP synthase alpha chain, mitochondrial precursor,ATP synthase F1, alpha subunit                  |                 |                 |                       | 1                      | Y                              |             | Y               |                      | Y               |
| 39            | Tb927.10.2020  | hexokinase                                                                                        |                 |                 |                       |                        |                                |             |                 |                      |                 |
| 40            | Tb927.10.1510  | NOT1                                                                                              |                 |                 |                       |                        |                                |             |                 |                      |                 |
| 41            | Tb927.2.1560   | cyclophilin-type peptidyl-prolyl cis-trans isomerase, putative                                    |                 |                 |                       |                        |                                |             |                 |                      |                 |
|               | Tb927.2.1680   | cyclophilin-type peptidyl-prolyl cis-trans isomerase, putative                                    |                 |                 |                       |                        |                                |             |                 |                      |                 |
| 42            | Tb927.3.3580   | lipophosphoglycan biosynthetic protein, putative                                                  |                 |                 | 1                     | 1                      | Y                              |             | Y               |                      | 1               |
| 43            | Tb927.3.1790   | pyruvate dehydrogenase E1 beta subunit, putative                                                  |                 | Y               |                       |                        |                                |             | Y               |                      | Y               |
| 44            | Tb927.10.7570  | dihydrolipoamide acetyltransferase E2 subunit, putative                                           |                 |                 |                       |                        |                                |             |                 |                      |                 |
| 45            | Tb927.5.3400   | calcium-translocating P-type ATPase,calcium pump                                                  | 10              |                 | 10                    | 10                     |                                |             | 9               |                      | 10              |
| 46            | Tb927.8.3750   | nucleolar protein, putative                                                                       |                 |                 |                       | 1                      |                                |             |                 |                      |                 |
| 47            | Tb927.1.4100   | cytochrome oxidase subunit IV                                                                     |                 |                 |                       |                        |                                |             | Y               |                      |                 |
| 48            | Tb927.8.2540   | 3-ketoacyl-CoA thiolase, putative                                                                 |                 |                 |                       |                        |                                |             |                 |                      |                 |
| 49            | Tb927.8.5640   | hypothetical protein, conserved                                                                   |                 |                 |                       |                        |                                |             |                 |                      |                 |
| 50            | Tb927.10.1170  | intraflagellar transport protein IFT172, putative                                                 |                 |                 |                       |                        |                                |             |                 |                      |                 |
| 51            | Tb927.10.12700 | pyruvate dehydrogenase E1 alpha subunit, putative                                                 |                 |                 |                       |                        |                                |             |                 |                      |                 |



## Transmembrane and Signal Pept

|     |                |                                                                                                       |   |   |   |  |   |   |   |
|-----|----------------|-------------------------------------------------------------------------------------------------------|---|---|---|--|---|---|---|
| 119 | Tb927.9.5730   | nucleosome assembly protein-like protein                                                              |   |   |   |  |   |   |   |
| 120 | Tb927.9.12730  | chaperone protein DNAj, putative                                                                      |   |   |   |  |   |   |   |
| 121 | Tb927.8.3380   | electron transfer protein, putative                                                                   |   |   |   |  |   |   | Y |
| 122 | Tb927.11.11010 | hypothetical protein, conserved                                                                       |   |   |   |  |   |   |   |
| 123 | Tb927.4.1500   | RNA editing associated helicase 2                                                                     |   |   |   |  |   |   |   |
| 124 | Tb927.3.3310   | 60S ribosomal protein L13, putative                                                                   |   |   |   |  |   |   |   |
|     | Tb927.3.3320   | 60S ribosomal protein L13, putative                                                                   |   |   |   |  |   |   |   |
| 125 | Tb927.11.5450  | malic enzyme, putative                                                                                |   |   |   |  |   |   |   |
| 126 | Tb927.2.450    | retrotransposon hot spot protein 4 (RHS4), putative                                                   |   |   |   |  |   | 1 |   |
| 127 | Tb927.10.13800 | hypothetical protein, conserved                                                                       |   |   |   |  |   |   |   |
| 128 | Tb927.10.14600 | 40S ribosomal protein S2, putative                                                                    |   |   |   |  |   |   |   |
|     | Tb927.10.14710 | 40S ribosomal protein S2, putative                                                                    |   |   |   |  |   |   |   |
| 129 | Tb927.9.3170   | cytochrome oxidase subunit V                                                                          |   |   |   |  |   |   | Y |
| 130 | Tb927.10.520   | hypothetical protein, conserved                                                                       | 1 |   | 1 |  |   | 1 | 1 |
| 131 | Tb927.11.1090  | calpain-like protein, putative,cytoskeleton associated protein, putative                              |   |   | 1 |  |   |   |   |
| 132 | Tb927.8.7530   | 3,2-trans-enoyl-CoA isomerase, mitochondrial precursor, putative                                      |   |   | 3 |  |   |   | Y |
| 133 | Tb927.10.450   | hypothetical protein, conserved                                                                       |   |   |   |  |   |   | Y |
| 134 | Tb927.11.13090 | elongation factor 1 gamma, putative                                                                   |   |   |   |  |   |   | Y |
|     | Tb927.11.13190 | elongation factor 1 gamma, putative                                                                   |   |   |   |  |   |   | Y |
| 135 | Tb927.7.1730   | 60S ribosomal protein L7, putative                                                                    |   |   |   |  |   |   |   |
| 136 | Tb927.6.1520   | aquaporin 3, putative                                                                                 | 6 |   | 6 |  |   | 6 | 6 |
| 137 | Tb927.11.6250  | hypothetical protein, conserved                                                                       |   |   | 1 |  |   |   |   |
| 138 | Tb927.11.3590  | 40S ribosomal protein S4, putative                                                                    |   |   |   |  |   | Y |   |
|     | Tb927.11.3600  | 40S ribosomal protein S4, putative                                                                    |   |   |   |  |   |   |   |
| 139 | Tb927.7.3550   | hypothetical protein, conserved                                                                       |   |   |   |  |   |   |   |
| 140 | Tb927.3.4760   | dynamins, putative,vacuolar sortin protein 1, putative                                                |   |   |   |  |   |   | 1 |
| 141 | Tb927.9.10310  | mitochondrial carrier protein, putative,mitochondrial phosphate transporter, putative                 | 4 |   | 1 |  |   |   | 6 |
| 142 | Tb927.9.10400  | hypothetical protein, conserved                                                                       |   |   |   |  |   |   |   |
| 143 | Tb927.10.14500 | hypothetical protein, conserved                                                                       |   |   |   |  |   |   |   |
| 144 | Tb927.7.1300   | protein disulfide isomerase, putative                                                                 |   |   |   |  | Y |   | Y |
| 145 | Tb927.10.3940  | 40S ribosomal protein S3A, putative                                                                   |   |   |   |  | Y |   | Y |
| 146 | Tb927.2.4710   | RNA-binding protein, putative                                                                         |   |   |   |  |   |   | 1 |
| 147 | Tb927.11.2060  | 60S acidic ribosomal subunit protein, putative                                                        |   |   |   |  |   |   | 1 |
|     | Tb927.11.2050  | 60S acidic ribosomal subunit protein, putative                                                        |   |   |   |  |   |   | 1 |
| 148 | Tb927.4.2450   | thioredoxin, putative                                                                                 | 2 | Y | 1 |  | 2 | Y | 2 |
| 149 | Tb927.4.4210   | ATP-dependent zinc metallopeptidase, putative,metallo-peptidase, Clan MA(E) Family M41                | 2 |   | 2 |  | Y | 2 | Y |
| 150 | Tb927.10.7500  | fibrillarin                                                                                           |   |   |   |  |   |   |   |
| 151 | Tb927.11.3490  | hypothetical protein, conserved                                                                       |   |   |   |  |   |   |   |
| 152 | Tb927.11.2670  | Nucleoporin                                                                                           |   |   |   |  |   |   | Y |
| 153 | Tb927.10.3650  | NADH-dependent fumarate reductase, putative                                                           |   |   |   |  |   |   | Y |
| 154 | Tb927.5.1300   | vacuolar proton translocating ATPase subunit A, putative                                              | 6 |   | 6 |  |   | 7 | 6 |
| 155 | Tb927.3.4970   | hypothetical protein, conserved                                                                       |   |   |   |  |   |   |   |
| 156 | Tb927.8.4810   | prohibitin 1                                                                                          |   |   |   |  |   |   | Y |
| 157 | Tb927.10.3990  | DHH1                                                                                                  |   |   |   |  |   |   |   |
| 158 | Tb927.11.8260  | carbonic anhydrase-like protein                                                                       | 1 | Y | 1 |  | Y | 1 | Y |
| 159 | Tb927.8.900    | splicing factor TSR1                                                                                  |   |   |   |  |   |   |   |
| 160 | Tb927.9.2900   | hypothetical protein, conserved                                                                       |   |   |   |  |   | 2 |   |
| 161 | Tb927.9.4210   | fatty acyl CoA synthetase 3                                                                           |   |   |   |  |   |   |   |
| 162 | Tb927.3.1120   | GTP-binding nuclear protein rtb2, putative                                                            |   |   |   |  |   |   |   |
| 163 | Tb927.5.3230   | hypothetical protein, conserved                                                                       |   |   |   |  |   |   | 2 |
| 164 | Tb927.11.1270  | hypothetical protein, conserved                                                                       |   |   |   |  |   |   | 2 |
| 165 | Tb927.2.3780   | translation initiation factor IF-2, putative                                                          | 2 |   | 2 |  |   | 2 | 2 |
| 166 | Tb927.11.13500 | par1                                                                                                  |   |   |   |  |   |   | 1 |
| 167 | Tb927.11.4480  | radial spoke protein RSP4/6, putative                                                                 |   |   |   |  |   |   | 1 |
| 168 | Tb927.5.1470   | NADH-cytochrome b5 reductase, putative                                                                |   |   |   |  |   |   |   |
| 169 | Tb927.8.1890   | cytochrome c1, heme protein, mitochondrial precursor                                                  |   | Y |   |  | Y |   | Y |
| 170 | Tb927.11.2410  | hypothetical protein, conserved                                                                       |   |   |   |  |   |   |   |
| 171 | Tb927.11.14730 | metalloprotease, putative,cell division protein FtsH homologue, putative                              | 1 |   | 1 |  |   | 1 | 1 |
| 172 | Tb927.6.4090   | chaperonin HSP60, mitochondrial precursor, putative                                                   |   |   |   |  |   |   |   |
| 173 | Tb927.3.3490   | high mobility group protein, putative                                                                 |   |   |   |  |   |   |   |
| 174 | Tb927.1.4310   | hypothetical protein, conserved                                                                       |   |   |   |  |   |   |   |
| 175 | Tb927.7.1790   | Adenine phosphoribosyltransferase, putative                                                           |   |   |   |  |   |   | 3 |
| 176 | Tb927.11.11360 | guanine nucleotide-binding protein beta subunit-like protein,activated protein kinase c receptor      |   |   |   |  |   |   | 2 |
|     | Tb927.11.11370 | guanine nucleotide-binding protein beta subunit-like protein,activated protein kinase c receptor      |   |   |   |  |   |   |   |
| 177 | Tb927.9.10560  | hypothetical protein, conserved                                                                       |   |   |   |  |   |   |   |
| 178 | Tb927.3.3670   | RNA-binding protein, putative                                                                         |   |   |   |  |   |   |   |
| 179 | Tb927.11.12150 | flagellar protein essential for flagellar pocket biogenesis                                           |   |   |   |  |   |   |   |
| 180 | Tb927.10.3260  | Long-chain-fatty-acid-CoA ligase 5 (EC 6.2.1.3) (Long-chain acyl-CoA synthetase 5) (LACS 5), putative |   |   |   |  |   |   |   |
| 181 | Tb927.3.2180   | hypothetical protein, conserved                                                                       | 1 |   | 1 |  |   | 1 | 1 |
| 182 | Tb927.10.560   | 40S ribosomal proteins S11, putative                                                                  |   |   |   |  |   |   |   |
| 183 | Tb927.7.4770   | cyclophilin-type peptidyl-prolyl cis-trans isomerase, putative                                        |   |   |   |  |   |   |   |
| 184 | Tb927.11.550   | hypothetical protein SCD6.10                                                                          |   |   |   |  |   |   |   |
| 185 | Tb927.8.890    | small GTP-binding protein Rab1, putative                                                              |   |   |   |  |   |   |   |



Transmembrane and Signal Pept

|     |                |                                                                                                                           |   |   |   |   |   |   |   |     |
|-----|----------------|---------------------------------------------------------------------------------------------------------------------------|---|---|---|---|---|---|---|-----|
| 257 | Tb927.11.9400  | hypothetical protein, conserved                                                                                           |   |   |   | 1 |   |   |   |     |
| 258 | Tb927.7.210    | proline dehydrogenase                                                                                                     |   |   |   |   |   |   |   |     |
| 259 | Tb927.11.8870  | mitochondrial DEAD box protein,KREH1                                                                                      |   |   |   |   |   |   |   |     |
| 260 | Tb927.11.1980  | hypothetical protein, conserved,zinc finger protein family member, putative                                               |   |   |   |   |   |   |   |     |
| 261 | Tb927.4.4910   | 3,2-trans-enoyl-CoA isomerase, mitochondrial precursor, putative                                                          |   |   |   |   |   |   |   |     |
| 262 | Tb927.10.16150 | ATP-dependent zinc metallopeptidase, putative,metallo-peptidase, Clan MA(E) Family M41                                    | 1 |   | 1 |   |   | 1 |   | 1   |
| 263 | Tb927.11.8050  | hypothetical protein, conserved                                                                                           |   |   |   |   |   |   |   |     |
| 264 | Tb927.10.2950  | hypothetical protein, conserved                                                                                           | 1 |   | 1 |   |   | 1 |   | 1   |
| 265 | Tb927.8.1550   | paraflagellar rod component, putative                                                                                     |   |   |   |   |   |   |   |     |
| 266 | Tb927.5.4420   | nucleolar RNA helicase II, putative,nucleolar RNA helicase Gu, putative                                                   |   |   |   |   |   |   |   |     |
| 267 | Tb927.10.770   | hypothetical protein, conserved                                                                                           |   |   |   |   |   |   |   |     |
| 268 | Tb927.11.3360  | hypothetical protein, conserved                                                                                           |   |   |   |   |   |   |   |     |
| 269 | Tb927.6.4980   | 40S ribosomal protein S14                                                                                                 |   |   |   |   |   |   |   |     |
| 270 | Tb927.10.10280 | microtubule-associated protein, putative                                                                                  |   |   |   |   |   |   |   |     |
| 271 | Tb927.3.1840   | 3-oxo-5-alpha-steroid 4-dehydrogenase, putative                                                                           | 4 |   | 4 |   |   | 4 |   | 4   |
| 272 | Tb927.11.4450  | hypothetical protein, conserved                                                                                           |   |   |   |   |   |   |   |     |
| 273 | Tb927.7.3370   | hypothetical protein, conserved                                                                                           |   |   |   |   |   |   |   |     |
| 274 | Tb927.8.4400   | hypothetical protein, conserved                                                                                           |   |   |   |   |   |   |   |     |
| 275 | Tb927.11.10760 | kinesin-like protein, putative                                                                                            |   |   |   |   |   |   |   |     |
| 276 | Tb927.10.9780  | ATP-dependent DEAD/H RNA helicase, putative,ATP- dependent RNA helicase, putative                                         |   |   |   |   |   |   |   |     |
| 277 | Tb927.11.16510 | hypothetical protein, conserved                                                                                           |   |   |   |   |   |   |   |     |
| 278 | Tb927.11.17000 | hypothetical protein, conserved,leucine-rich repeat protein (LRRP), putative                                              |   |   |   |   |   |   |   |     |
| 279 | Tb927.9.15360  | 40S ribosomal protein S6, putative                                                                                        |   |   |   |   |   |   |   |     |
| 280 | Tb927.10.170   | pseudouridine synthase, Cbf5p                                                                                             |   |   |   |   |   |   |   |     |
| 281 | Tb927.3.5570   | syntaxin, putative                                                                                                        | 1 |   | 1 |   |   | 1 |   | 1   |
| 282 | Tb927.10.6630  | ATP-dependent DEAD/H RNA helicase HEL64, putative                                                                         |   |   |   |   |   |   |   |     |
| 283 | Tb927.8.2740   | mitochondrial RNA binding protein                                                                                         |   |   |   |   |   |   |   |     |
| 284 | Tb927.10.2770  | eukaryotic translation initiation factor 5, putative                                                                      |   |   |   |   |   |   |   |     |
| 285 | Tb927.7.3980   | immunodominant antigen, putative,tc40 antigen-like                                                                        |   |   |   |   |   |   |   |     |
| 286 | Tb927.3.3590   | U3 small nucleolar ribonucleoprotein protein MPP10, putative                                                              |   |   |   |   |   |   |   |     |
| 287 | Tb927.11.11540 | DNA topoisomerase II, putative                                                                                            |   |   |   |   |   |   |   |     |
| 288 | Tb927.7.1290   | hypothetical protein, conserved                                                                                           | 1 | Y | 1 |   | Y | 1 | Y | 1 Y |
| 289 | Tb927.11.2790  | hypothetical protein, conserved                                                                                           |   |   |   |   |   |   |   |     |
| 290 | Tb927.8.2000   | cyclophilin, putative                                                                                                     | 2 |   | 1 |   |   |   | Y | 2   |
| 291 | Tb927.8.1860   | pitriylsin-like metalloprotease,metallo-peptidase, Clan ME, Family M16C                                                   |   |   |   |   |   |   | Y |     |
| 292 | Tb927.11.6210  | sterol 14-alpha-demethylase                                                                                               |   |   |   |   |   |   | Y |     |
| 293 | Tb927.6.4130   | hypothetical protein, conserved                                                                                           |   |   |   |   |   |   |   |     |
| 294 | Tb927.9.13990  | RNA-binding protein, putative                                                                                             |   |   |   |   |   |   |   |     |
| 295 | Tb927.6.2050   | ribosome biogenesis regulatory protein (RRS1), putative                                                                   |   |   |   |   |   |   |   |     |
| 296 | Tb927.4.410    | CAF 40                                                                                                                    |   |   |   |   |   |   |   |     |
| 297 | Tb927.7.280    | cyclophilin-type peptidyl-prolyl cis-trans isomerase, putative                                                            |   | Y |   |   | Y | 1 | Y | Y   |
| 298 | Tb927.10.6050  | clathrin heavy chain                                                                                                      |   |   |   |   |   |   |   |     |
| 299 | Tb927.9.14200  | hypothetical protein, conserved                                                                                           | 1 |   | 1 |   |   | 1 |   | 1   |
| 300 | Tb927.3.5020   | hypothetical protein, conserved                                                                                           |   |   |   |   |   |   |   |     |
| 301 | Tb927.8.6390   | lysophospholipase, putative,alpha/beta hydrolase, putative                                                                |   |   |   |   |   |   |   |     |
| 302 | Tb927.11.6050  | hypothetical protein, conserved                                                                                           |   |   |   |   |   |   |   |     |
| 303 | Tb927.2.4550   | FtsJ cell division protein, putative                                                                                      |   |   |   |   |   |   |   |     |
| 304 | Tb927.9.15330  | hypothetical protein, conserved                                                                                           |   |   |   |   |   |   |   |     |
| 305 | Tb927.11.5220  | chaperone protein DNAj, putative                                                                                          | 1 | Y | 1 |   | Y | 1 | Y | 1 Y |
| 306 | Tb927.11.3500  | hypothetical protein, conserved                                                                                           |   |   |   |   |   |   |   |     |
| 307 | Tb927.6.1470   | hypothetical protein, conserved                                                                                           |   |   |   |   |   |   |   |     |
| 308 | Tb927.1.1700   | hypothetical protein, conserved                                                                                           |   |   |   |   |   |   |   |     |
| 309 | Tb927.2.5130   | hypothetical protein, conserved                                                                                           |   |   |   |   |   |   |   |     |
| 310 | Tb927.8.2630   | kinesin, putative                                                                                                         |   |   |   |   |   |   |   |     |
| 311 | Tb927.11.6300  | 40S ribosomal protein S5, putative                                                                                        |   |   |   |   |   |   |   |     |
| 312 | Tb927.9.1750   | hypothetical protein, conserved                                                                                           |   |   |   |   |   |   |   |     |
| 313 | Tb927.9.11000  | small GTPase, putative,GTP-binding protein, putative                                                                      |   |   |   |   |   |   |   |     |
| 314 | Tb927.9.11850  | structural maintenance of chromosome 1, putative                                                                          |   |   |   |   |   |   |   |     |
| 315 | Tb927.10.4760  | hypothetical protein, conserved                                                                                           | 3 |   | 3 |   |   | 3 |   | 3   |
| 316 | Tb927.6.3890   | replication factor C, subunit 2, putative                                                                                 |   |   |   |   |   |   |   |     |
| 317 | Tb927.11.16480 | enoyl-CoA hydratase/isomerase family protein, putative                                                                    |   |   |   |   |   |   |   |     |
| 318 | Tb927.7.2190   | hypothetical protein, conserved                                                                                           | 2 | Y | 2 |   | Y | 1 | Y | 2 Y |
| 319 | Tb927.7.3430   | cyclophilin-type peptidyl-prolyl cis-trans isomerase, putative                                                            |   |   |   |   |   |   |   |     |
| 320 | Tb927.11.3770  | hypothetical protein, conserved                                                                                           |   |   |   |   |   |   |   |     |
| 321 | Tb927.7.3330   | hypothetical protein, conserved                                                                                           |   |   |   |   |   |   |   |     |
| 322 | Tb927.11.7900  | mitochondrial RNA binding protein,RBP16,RNA- binding protein of 16 kDa                                                    |   |   |   |   |   |   |   |     |
| 323 | Tb927.11.10240 | hsiVU complex proteolytic subunit, putative,hsiVU complex proteolytic subunit, threonine peptidase, Clan T(1), family T1B |   |   |   |   |   |   |   |     |
| 324 | Tb927.6.2640   | importin alpha subunit, putative                                                                                          |   |   |   |   |   |   |   |     |
| 325 | Tb927.10.4000  | methylglutaconyl-CoA hydratase, mitochondrial precursor, putative                                                         |   |   |   |   |   |   | Y |     |
| 326 | Tb927.4.1540   | hypothetical protein, conserved                                                                                           | 1 |   | 1 |   |   | 1 |   | 1   |
| 327 | Tb927.6.4630   | kinetoplastid-specific phospho-protein phosphatase, putative                                                              | 3 |   | 1 |   |   | 3 | Y | 3   |
| 328 | Tb927.11.5600  | hypothetical protein, conserved                                                                                           | 1 |   |   |   |   | 1 |   | 1   |
| 329 | Tb927.10.5990  | hypothetical protein, conserved                                                                                           |   |   |   |   |   |   |   |     |



Transmembrane and Signal Pept

|     |                |                                                                                                                     |   |   |  |   |  |   |  |   |  |    |   |  |   |   |
|-----|----------------|---------------------------------------------------------------------------------------------------------------------|---|---|--|---|--|---|--|---|--|----|---|--|---|---|
| 403 | Tb927.4.590    | hypothetical protein, conserved                                                                                     | 1 | Y |  | 1 |  | 3 |  | Y |  | 1  | Y |  | 1 | Y |
| 404 | Tb927.4.600    | hypothetical protein, conserved                                                                                     |   |   |  |   |  |   |  |   |  |    |   |  |   |   |
| 405 | Tb927.1.1580   | cytochrome c oxidase assembly factor, putative,electron transport protein SCO1/2, putative                          | 1 |   |  |   |  | 1 |  |   |  | 1  |   |  | 1 |   |
| 406 | Tb927.6.2560   | hypothetical protein, conserved                                                                                     | 1 | Y |  | 1 |  | 2 |  | Y |  | 1  | Y |  | 1 | Y |
| 407 | Tb927.11.4980  | ATP-dependent DEAD/H RNA helicase, putative,ATP- dependent RNA helicase, putative                                   |   |   |  |   |  |   |  |   |  |    |   |  |   |   |
| 408 | Tb927.11.13510 | hypothetical protein, conserved                                                                                     |   |   |  |   |  | 1 |  |   |  |    |   |  |   |   |
| 409 | Tb927.11.7780  | hypothetical protein, conserved                                                                                     | 1 |   |  | 1 |  | 1 |  |   |  | 1  |   |  | 1 |   |
| 410 | Tb927.11.7290  | pantothenate kinase subunit, putative                                                                               | 2 |   |  |   |  | 2 |  |   |  | 2  |   |  | 2 |   |
| 411 | Tb927.9.9860   | hypothetical protein, conserved                                                                                     |   | Y |  |   |  | 1 |  | Y |  |    | Y |  |   | Y |
| 412 | Tb927.11.2510  | hypothetical protein, conserved                                                                                     |   |   |  |   |  | 2 |  |   |  |    |   |  |   |   |
| 413 | Tb927.7.3630   | TPR-repeat-containing chaperone protein DNAJ, putative                                                              |   | Y |  |   |  | 1 |  | Y |  |    | Y |  |   | Y |
| 414 | Tb927.3.3450   | ADP-ribosylation factor-like protein 3A, putative                                                                   |   |   |  |   |  |   |  |   |  |    |   |  |   |   |
| 415 | Tb927.10.15000 | hypothetical protein, conserved                                                                                     |   |   |  |   |  |   |  |   |  |    |   |  |   |   |
| 416 | Tb927.11.10140 | hypothetical protein, conserved                                                                                     | 2 |   |  | 1 |  | 3 |  |   |  |    |   |  | 2 |   |
| 417 | Tb927.11.3710  | hypothetical protein, conserved                                                                                     |   |   |  |   |  |   |  |   |  |    |   |  |   |   |
| 418 | Tb927.10.11300 | paraflagellar rod component, putative                                                                               |   |   |  |   |  |   |  |   |  |    |   |  |   |   |
| 419 | Tb927.7.4550   | 60S ribosomal protein-like                                                                                          |   |   |  |   |  |   |  |   |  |    | Y |  |   |   |
| 420 | Tb927.11.5820  | hypothetical protein, conserved                                                                                     | 6 |   |  | 6 |  | 7 |  |   |  | 6  |   |  | 6 |   |
| 421 | Tb927.10.3500  | RNA-binding protein, putative                                                                                       |   |   |  |   |  |   |  |   |  |    |   |  |   |   |
| 422 | Tb927.10.9810  | hypothetical protein, conserved                                                                                     |   |   |  |   |  |   |  |   |  |    |   |  |   |   |
| 423 | Tb927.10.15170 | hypothetical protein, conserved                                                                                     |   |   |  |   |  |   |  |   |  |    |   |  |   |   |
| 424 | Tb927.9.2650   | hypothetical protein, conserved                                                                                     | 1 |   |  | 1 |  | 1 |  |   |  | 1  |   |  | 1 |   |
| 425 | Tb927.11.6440  | hypothetical protein, conserved                                                                                     |   |   |  |   |  |   |  |   |  |    |   |  |   |   |
| 426 | Tb927.5.1520   | heat shock protein HslVU, ATPase subunit HslU, putative                                                             |   |   |  |   |  |   |  |   |  |    | Y |  |   |   |
| 427 | Tb927.4.4690   | hypothetical protein, conserved                                                                                     |   |   |  |   |  |   |  |   |  |    |   |  |   |   |
| 428 | Tb927.10.13720 | RNA-binding protein, putative                                                                                       |   |   |  |   |  |   |  |   |  |    |   |  |   |   |
| 429 | Tb927.3.2660   | hypothetical protein, conserved                                                                                     |   |   |  |   |  |   |  |   |  |    |   |  |   |   |
| 430 | Tb927.7.320    | hypothetical protein, conserved                                                                                     |   |   |  |   |  |   |  |   |  |    |   |  |   |   |
| 431 | Tb927.9.9060   | p21 antigen protein, putative                                                                                       |   |   |  |   |  | 1 |  |   |  |    |   |  |   |   |
| 432 | Tb927.11.10660 | hypothetical protein, conserved                                                                                     |   |   |  |   |  |   |  |   |  |    |   |  |   |   |
| 433 | Tb927.11.14090 | hypothetical protein, conserved                                                                                     |   |   |  |   |  |   |  |   |  |    |   |  |   |   |
| 434 | Tb927.9.8740   | RNA-binding protein                                                                                                 |   |   |  |   |  |   |  |   |  |    |   |  |   |   |
| 435 | Tb927.7.7500   | thymine-7-hydroxylase, putative                                                                                     |   |   |  |   |  |   |  |   |  |    |   |  |   |   |
| 436 | Tb927.9.8160   | chaperone protein DNAJ, putative                                                                                    |   |   |  |   |  |   |  |   |  |    |   |  |   |   |
| 437 | Tb927.2.100    | retrotransposon hot spot protein 1 (RHS1), putative                                                                 | 8 |   |  | 8 |  | 7 |  |   |  | 8  |   |  | 8 |   |
| 438 | Tb927.11.10780 | hypothetical protein, conserved                                                                                     |   |   |  |   |  |   |  |   |  |    |   |  |   |   |
| 439 | Tb927.2.2970   | mitochondrial carrier protein, putative                                                                             |   |   |  |   |  | 4 |  |   |  |    |   |  |   |   |
| 440 | Tb927.10.4050  | serine palmitoyltransferase, putative                                                                               | 1 |   |  | 1 |  | 4 |  |   |  | 1  |   |  | 1 |   |
| 441 | Tb04.24M18.150 | hypothetical protein, conserved                                                                                     |   |   |  |   |  |   |  |   |  |    |   |  |   |   |
| 442 | Tb927.6.4990   | ATP synthase, epsilon chain, putative                                                                               |   |   |  |   |  |   |  |   |  |    | Y |  |   |   |
| 443 | Tb927.10.9830  | hypothetical protein, conserved                                                                                     |   |   |  |   |  |   |  |   |  |    | Y |  |   |   |
| 444 | Tb927.10.10140 | paraflagellar rod component, putative                                                                               |   |   |  |   |  |   |  |   |  |    |   |  |   |   |
| 445 | Tb927.6.1570   | 2-hydroxy-3-oxopropionate reductase, putative                                                                       |   |   |  |   |  |   |  |   |  |    |   |  |   |   |
| 446 | Tb927.8.6240   | hypothetical protein, conserved                                                                                     |   |   |  |   |  |   |  |   |  |    |   |  |   |   |
| 447 | Tb927.11.1670  | cysteine desulfurase                                                                                                |   | Y |  |   |  | 1 |  | Y |  |    | Y |  |   | Y |
| 448 | Tb927.10.1100  | 60S ribosomal protein L9, putative                                                                                  |   |   |  |   |  |   |  |   |  |    |   |  |   |   |
| 449 | Tb927.3.2880   | hypothetical protein, conserved                                                                                     | 1 |   |  |   |  | 1 |  |   |  | 1  |   |  | 1 |   |
| 450 | Tb927.11.14700 | hypothetical protein, conserved                                                                                     | 2 |   |  |   |  | 2 |  |   |  | 1  |   |  | 2 |   |
| 451 | Tb927.10.7350  | hypothetical protein, conserved                                                                                     |   |   |  |   |  |   |  |   |  |    |   |  |   |   |
| 452 | Tb927.2.270    | retrotransposon hot spot protein (RHS, pseudogene), putative,retrotransposon hot spot protein 3 (RHS3), frameshift  |   |   |  |   |  |   |  |   |  |    |   |  |   |   |
| 453 | Tb927.10.11390 | 60S ribosomal protein L6, putative                                                                                  |   |   |  |   |  |   |  |   |  |    |   |  |   |   |
| 454 | Tb927.8.3290   | DNA polymerase zeta catalytic subunit, putative                                                                     |   |   |  |   |  |   |  |   |  |    |   |  |   |   |
| 455 | Tb927.10.15360 | hypothetical protein, conserved                                                                                     | 2 |   |  |   |  | 3 |  |   |  | 2  | Y |  | 2 | Y |
| 456 | Tb927.10.6640  | COP-coated vesicle membrane protein erv25 precursor, putative,ER--golgi transport protein erv25 precursor, putative | 2 |   |  | 2 |  | 2 |  | Y |  | 1  | Y |  | 2 | Y |
| 457 | Tb927.10.4040  | 3-keto-dihydrosphingosine reductase                                                                                 | 3 | Y |  | 1 |  | 5 |  | Y |  |    | Y |  | 3 | Y |
| 458 | Tb927.10.4130  | NADH-ubiquinone oxidoreductase complex I subunit, putative,NDUFA5/B13 subunit, putative                             |   |   |  |   |  |   |  |   |  |    |   |  |   |   |
| 459 | Tb927.3.1410   | cytochrome oxidase subunit VII                                                                                      |   |   |  |   |  |   |  |   |  |    |   |  |   |   |
| 460 | Tb927.11.4650  | hypothetical protein, conserved                                                                                     |   |   |  |   |  |   |  |   |  |    |   |  |   |   |
| 461 | Tb927.11.6230  | pretranslocation protein, alpha subunit, putative,SEC61-like (pretranslocation process) protein, putative           | 9 |   |  | 9 |  | 9 |  |   |  | 1  |   |  | 9 |   |
| 462 | Tb927.8.2020   | agmatinase, putative                                                                                                |   |   |  |   |  |   |  |   |  | 10 |   |  |   |   |
| 463 | Tb927.2.5270   | dynein heavy chain, putative                                                                                        |   |   |  |   |  |   |  |   |  |    |   |  |   |   |
| 464 | Tb927.10.10010 | 60S acidic ribosomal protein, putative                                                                              |   |   |  |   |  |   |  |   |  | 2  |   |  |   |   |
| 465 | Tb927.4.3890   | ATP-dependent RNA helicase, putative                                                                                |   |   |  |   |  |   |  |   |  |    |   |  |   |   |
| 466 | Tb927.11.10090 | hypothetical protein, conserved                                                                                     |   |   |  |   |  |   |  |   |  | 1  |   |  |   |   |
| 467 | Tb927.4.3070   | hypothetical protein, conserved                                                                                     |   |   |  |   |  |   |  |   |  |    |   |  |   |   |
| 468 | Tb927.7.6350   | NADH-ubiquinone oxidoreductase, mitochondrial, putative                                                             |   |   |  |   |  |   |  | Y |  |    |   |  |   |   |
| 469 | Tb927.8.4930   | hypothetical protein, conserved                                                                                     |   |   |  |   |  |   |  |   |  |    |   |  |   |   |
| 470 | Tb927.1.90     | retrotransposon hot spot protein (RHS, pseudogene), putative                                                        |   |   |  |   |  |   |  |   |  |    |   |  |   |   |
| 471 | Tb927.9.6920   | hypothetical protein, conserved                                                                                     |   |   |  |   |  |   |  |   |  |    |   |  |   |   |
| 472 | Tb927.6.4320   | hypothetical protein, conserved                                                                                     |   |   |  |   |  |   |  |   |  |    |   |  |   |   |
| 473 | Tb927.7.6260   | hypothetical protein, conserved                                                                                     | 1 |   |  | 1 |  | 1 |  |   |  | 1  |   |  | 1 |   |
| 474 | Tb927.11.4920  | hypothetical protein, conserved                                                                                     |   |   |  |   |  |   |  |   |  |    |   |  |   |   |
| 475 | Tb927.11.15850 | hypothetical protein, conserved                                                                                     |   |   |  |   |  |   |  |   |  |    |   |  |   |   |

Transmembrane and Signal Pept

|     |                |                                                                                        |   |   |   |  |    |   |   |   |   |   |
|-----|----------------|----------------------------------------------------------------------------------------|---|---|---|--|----|---|---|---|---|---|
| 476 | Tb927.10.510   | hypothetical protein, conserved                                                        | 2 |   |   |  | 2  |   |   | 1 |   | 2 |
| 477 | Tb927.9.10520  | hypothetical protein, conserved                                                        |   |   |   |  | 1  |   |   |   |   |   |
| 478 | Tb927.10.15710 | mitochondrial carrier protein, putative                                                |   |   |   |  | 5  |   |   |   |   |   |
| 479 | Tb927.4.3840   | nucleolar protein, putative                                                            |   |   |   |  |    |   |   |   |   |   |
| 480 | Tb927.11.13890 | hypothetical protein, conserved                                                        |   |   |   |  |    |   |   |   |   |   |
| 481 | Tb927.7.5790   | protein disulfide isomerase, putative                                                  |   | Y |   |  | 1  | Y |   | Y |   | Y |
| 482 | Tb927.7.7260   | kinesin, putative                                                                      |   |   |   |  |    |   |   |   |   |   |
| 483 | Tb927.4.1280   | hypothetical protein, conserved                                                        |   |   |   |  |    |   |   |   |   |   |
| 484 | Tb927.3.2080   | hypothetical protein, conserved                                                        | 1 |   | 1 |  | 1  |   |   | 1 |   | 1 |
| 485 | Tb927.11.7520  | hypothetical protein, conserved                                                        |   |   |   |  |    |   |   |   |   |   |
| 486 | Tb927.5.3800   | glutamine hydrolysing (not ammonia-dependent) carbomoyl phosphate synthase, putative   |   |   |   |  |    |   |   |   |   |   |
| 487 | Tb927.11.13310 | hypothetical protein, conserved                                                        |   |   |   |  |    |   |   |   |   |   |
| 488 | Tb927.7.7210   | hypothetical protein, conserved                                                        |   |   |   |  |    |   |   |   |   |   |
| 489 | Tb927.11.16750 | hypothetical protein, conserved                                                        | 1 |   | 1 |  | 2  |   |   | 1 |   | 1 |
| 490 | Tb927.10.830   | adenylate kinase, putative                                                             |   |   |   |  |    |   |   |   |   |   |
| 491 | Tb927.7.6990   | hypothetical protein, conserved                                                        | 1 |   | 1 |  | 1  |   |   | 1 |   | 1 |
| 492 | Tb927.11.5250  | hypothetical protein, conserved                                                        | 3 |   |   |  | 1  |   |   | 5 |   | 3 |
| 493 | Tb927.10.8980  | hypothetical protein, conserved                                                        |   |   |   |  |    |   |   |   |   |   |
| 494 | Tb927.11.12040 | hypothetical protein, conserved                                                        |   | Y |   |  | 2  | Y |   | Y |   | Y |
| 495 | Tb927.11.540   | ABC transporter, putative                                                              | 6 | Y | 6 |  | 7  | Y | 5 | Y | 6 | Y |
| 496 | Tb927.11.6430  | hypothetical protein, conserved                                                        |   |   |   |  | 2  |   |   |   |   |   |
| 497 | Tb927.1.3450   | hypothetical protein, conserved                                                        |   |   |   |  |    |   |   |   |   |   |
| 498 | Tb927.8.6640   | hypothetical protein, conserved                                                        |   |   |   |  |    |   |   |   |   |   |
| 499 | Tb927.11.610   | hypothetical protein, conserved                                                        |   |   |   |  | 3  |   |   |   |   |   |
| 500 | Tb927.8.1870   | Golgi/lysosome glycoprotein 1                                                          | 1 | Y | 1 |  | 1  | Y | 1 | Y | 1 | Y |
| 501 | Tb927.8.6050   | hypothetical protein, conserved                                                        | 1 |   |   |  | 1  |   | 1 |   |   |   |
| 502 | Tb927.6.2870   | hypothetical protein, conserved                                                        |   |   |   |  | 1  |   |   |   |   |   |
| 503 | Tb927.6.630    | hypothetical protein, conserved                                                        |   |   |   |  |    |   |   | Y |   |   |
| 504 | Tb927.7.4290   | hypothetical protein, conserved                                                        |   |   |   |  |    |   |   |   |   |   |
| 505 | Tb927.5.4040   | hypothetical protein, conserved                                                        |   |   |   |  |    |   |   |   |   |   |
| 506 | Tb927.10.12960 | ras-related protein rab-5,small GTPase, putative                                       |   |   |   |  |    |   |   |   |   |   |
| 507 | Tb927.10.2550  | malate dehydrogenase-related                                                           |   |   |   |  | 1  |   |   |   |   |   |
| 508 | Tb927.3.1820   | hypothetical protein, conserved                                                        |   |   |   |  |    |   |   |   |   |   |
| 509 | Tb927.6.3670   | paraflagellar rod component, putative                                                  |   |   |   |  |    |   |   |   |   |   |
| 510 | Tb927.5.1680   | hypothetical protein, conserved                                                        |   |   |   |  | 1  |   |   |   |   |   |
| 511 | Tb927.8.4450   | RNA-binding protein, putative                                                          |   |   |   |  |    |   |   |   |   |   |
| 512 | Tb927.6.4080   | hypothetical protein, conserved                                                        |   |   |   |  |    |   |   |   |   |   |
| 513 | Tb927.6.1870   | eukaryotic translation initiation factor 4e, putative                                  |   |   |   |  |    |   |   |   |   |   |
| 514 | Tb927.11.6660  | hypothetical protein, conserved                                                        |   |   |   |  |    |   |   | Y |   |   |
| 515 | Tb927.9.14420  | cyclophilin-like protein, putative                                                     | 1 |   | 1 |  | 1  |   | 1 |   | Y | 1 |
| 516 | Tb927.10.9820  | mitochondrial intermediate peptidase, putative,metallo-peptidase, Clan MA(E) Family M3 |   |   |   |  |    |   |   | Y |   |   |
| 517 | Tb927.11.10960 | hypothetical protein, conserved                                                        |   |   |   |  |    |   |   | Y |   |   |
| 518 | Tb927.11.8800  | hypothetical protein, conserved                                                        | 2 |   | 2 |  | 2  |   | 2 |   |   | 2 |
| 519 | Tb927.5.2530   | hypothetical protein, conserved                                                        |   |   |   |  | 1  |   |   |   |   | 1 |
| 520 | Tb927.5.3390   | ADG1, pseudogene                                                                       | 1 |   | 1 |  | 1  |   | 1 |   |   | 1 |
| 521 | Tb927.7.5680   | deoxyribose-phosphate aldolase, putative                                               |   |   |   |  |    |   |   |   |   |   |
| 522 | Tb927.10.6610  | chaperone protein DNAj, putative                                                       | 1 |   | 1 |  | 1  |   | 1 |   | Y | 1 |
| 523 | Tb927.11.9560  | oxidoreductase, putative                                                               |   |   |   |  |    |   |   |   |   |   |
| 524 | Tb927.10.3640  | hypothetical protein, conserved                                                        | 7 |   | 6 |  | 7  |   | 7 |   |   | 7 |
| 525 | Tb927.6.4070   | hypothetical protein, conserved                                                        | 2 |   |   |  | 1  |   | 2 |   |   | 2 |
| 526 | Tb927.11.7100  | hypothetical protein, conserved                                                        |   |   |   |  |    |   |   |   |   |   |
| 527 | Tb927.11.1680  | vesicular-fusion protein SEC18, putative                                               |   |   | 1 |  |    |   |   | Y |   |   |
| 528 | Tb927.8.5860   | 50S ribosomal protein L17, putative                                                    |   |   |   |  |    |   |   |   |   |   |
| 529 | Tb927.10.14770 | protein kinase, putative                                                               |   |   |   |  | 2  |   |   |   |   |   |
| 530 | Tb927.7.4460   | hypothetical protein, conserved                                                        |   |   |   |  |    |   |   |   |   |   |
| 531 | Tb927.2.2160   | paraflagellar rod component, putative                                                  |   |   |   |  |    |   |   |   |   |   |
| 532 | Tb927.10.360   | hypothetical protein, conserved                                                        |   |   |   |  |    |   |   |   |   |   |
| 533 | Tb927.7.1090   | hypothetical protein, conserved                                                        |   |   |   |  |    |   |   |   |   |   |
| 534 | Tb927.11.8030  | hypothetical protein, conserved                                                        |   |   |   |  |    |   |   |   |   |   |
| 535 | Tb927.8.3050   | hypothetical protein, conserved                                                        | 1 |   | 1 |  | 1  |   | 1 |   |   | 1 |
| 536 | Tb927.11.10080 | hypothetical protein, conserved                                                        |   |   |   |  |    |   |   |   |   |   |
| 537 | Tb927.11.10210 | hypothetical protein, conserved                                                        | 2 |   |   |  | 2  |   | 1 |   |   | 2 |
| 538 | Tb927.6.5090   | hypothetical protein, conserved                                                        | 9 |   | 9 |  | 12 |   | 9 |   |   | 9 |
| 539 | Tb927.11.460   | hypothetical protein, conserved,predicted WD40 repeat protein                          |   |   |   |  |    |   |   |   |   |   |
| 540 | Tb927.11.11250 | cytosolic malate dehydrogenase                                                         |   |   |   |  | 1  |   |   |   |   |   |
| 541 | Tb927.6.1550   | hypothetical protein, conserved,leucine-rich repeat protein (LRRP), putative           | 1 |   | 1 |  | 1  |   | 1 |   |   | 1 |
| 542 | Tb927.7.540    | chaperone protein DNAj, putative                                                       |   |   |   |  |    |   |   |   |   |   |
| 543 | Tb927.7.5320   | hypothetical protein, conserved                                                        |   |   |   |  |    |   |   |   |   |   |
| 544 | Tb927.10.14720 | peroxin 13                                                                             | 2 |   |   |  | 1  |   | 2 |   |   | 2 |
| 545 | Tb927.4.1600   | hypothetical protein, conserved                                                        | 1 |   | 1 |  | 1  |   | 1 |   |   | 1 |
| 546 | Tb927.9.3370   | thioredoxin                                                                            |   |   |   |  |    |   |   |   |   |   |
| 547 | Tb927.10.10800 | hypothetical protein, conserved                                                        | 4 |   | 4 |  | 4  |   | 4 |   |   | 4 |
| 548 | Tb927.7.3810   | hypothetical protein, conserved                                                        |   |   |   |  |    |   |   | Y |   |   |



Transmembrane and Signal Pept

|     |                |                                                                                                   |    |   |  |   |  |    |   |  |    |   |    |
|-----|----------------|---------------------------------------------------------------------------------------------------|----|---|--|---|--|----|---|--|----|---|----|
| 549 | Tb927.10.7700  | ABC transporter, putative                                                                         | 6  |   |  | 5 |  | 7  |   |  | 6  |   | 6  |
| 550 | Tb927.8.8120   | hypothetical protein, conserved                                                                   | 1  | Y |  |   |  | 1  | Y |  | 1  | Y | 1  |
| 551 | Tb927.7.2670   | hypothetical protein, conserved,zinc finger protein family member, putative                       |    |   |  |   |  |    |   |  |    |   | Y  |
| 552 | Tb927.9.10070  | hypothetical protein, conserved                                                                   |    |   |  |   |  |    |   |  |    | Y |    |
| 553 | Tb927.10.15950 | TFIID-like protein, putative                                                                      |    |   |  |   |  |    |   |  |    |   |    |
| 554 | Tb927.5.1160   | hypothetical protein, conserved                                                                   | 1  | Y |  | 1 |  | 1  | Y |  | Y  | Y | 1  |
| 555 | Tb927.6.2720   | calcium-binding protein, putative                                                                 |    |   |  |   |  |    |   |  |    |   |    |
| 556 | Tb927.11.15240 | small GTPase, putative,ras-related protein rab-2a, putative                                       |    |   |  |   |  |    |   |  |    |   |    |
| 557 | Tb927.10.600   | hypothetical protein, conserved                                                                   |    |   |  |   |  |    |   |  |    |   |    |
| 558 | Tb927.9.15060  | rRNA processing protein, putative                                                                 |    |   |  |   |  |    |   |  |    |   |    |
| 559 | Tb927.9.5040   | cAMP-specific phosphodiesterase                                                                   |    |   |  |   |  | 1  |   |  |    |   |    |
| 560 | Tb927.8.4500   | eukaryotic translation initiation factor 4 gamma, putative                                        |    |   |  |   |  |    |   |  |    |   |    |
| 561 | Tb927.9.5280   | hypothetical protein, conserved                                                                   |    |   |  |   |  |    |   |  |    |   |    |
| 562 | Tb927.2.4090   | hypothetical protein, conserved                                                                   | 2  |   |  | 2 |  | 1  |   |  | Y  | Y | 2  |
| 563 | Tb927.8.4890   | endoplasmic reticulum oxidoreductin, putative,pol-associated gene 1                               | 2  | Y |  | 1 |  | 3  | Y |  | Y  | Y | 2  |
| 564 | Tb927.10.790   | vesicle-associated membrane protein, putative,synaptobrevin, putative                             | 1  |   |  | 1 |  | 1  |   |  | 1  |   | 1  |
| 565 | Tb927.11.3240  | T-complex protein 1, zeta subunit, putative                                                       |    |   |  |   |  |    |   |  |    |   |    |
| 566 | Tb927.11.10170 | hypothetical protein, conserved                                                                   |    |   |  |   |  |    |   |  |    |   |    |
| 567 | Tb927.10.10880 | ATP-binding cassette protein, putative,ABC transporter, putative,ATPase, putative                 |    |   |  |   |  | 2  |   |  |    |   |    |
| 568 | Tb927.11.2570  | hypothetical protein, conserved                                                                   |    |   |  |   |  | 1  |   |  |    |   |    |
| 569 | Tb927.8.3150   | T-complex protein 1, gamma subunit, putative                                                      |    |   |  |   |  |    |   |  |    |   |    |
| 570 | Tb927.11.11160 | sodium/sulphate symporter, putative                                                               | 10 |   |  | 9 |  | 12 |   |  | 10 | Y | 10 |
| 571 | Tb927.10.14030 | hypothetical protein, conserved                                                                   |    | Y |  |   |  |    | Y |  |    | Y | Y  |
| 572 | Tb927.11.2120  | hypothetical protein, conserved                                                                   |    |   |  |   |  | 1  |   |  |    |   |    |
| 573 | Tb927.11.14960 | pumilio/PUF RNA binding protein 7, putative                                                       |    |   |  |   |  | 1  |   |  |    |   |    |
| 574 | Tb927.6.4970   | serine/arginine-rich protein specific kinase SRPK, putative,protein kinase, putative              |    |   |  |   |  |    |   |  |    |   |    |
| 575 | Tb927.10.14390 | hypothetical protein, conserved                                                                   |    |   |  |   |  |    |   |  |    | Y |    |
| 576 | Tb927.9.9940   | PACRGB,flagellar component                                                                        |    |   |  |   |  |    |   |  |    |   |    |
| 577 | Tb927.10.4430  | pumilio RNA binding protein PUF1                                                                  |    |   |  |   |  |    |   |  |    |   |    |
| 578 | Tb927.6.5210   | variant surface glycoprotein (VSG, pseudogene), putative,variant surface glycoprotein, frameshift |    |   |  |   |  | 1  |   |  |    | Y |    |
| 579 | Tb927.8.1240   | electron transfer flavoprotein-ubiquinone oxidoreductase, putative                                |    |   |  |   |  |    |   |  |    |   |    |
| 580 | Tb927.10.12260 | cytosolic nonspecific dipeptidase, putative,peptidase (M20/M25/M40 family), putative              |    |   |  |   |  |    |   |  |    |   |    |
