# Supplementary material for: Proteomic Analysis of the Acidocalcisome, an Organelle Conserved from Bacteria to Human Cells
Source: PubMed Central journal article supplement (PMC4263762; doi:10.1371/journal.ppat.1004555), 2014-12-11
Supplement: ppat.1004555.s014.pdf [file ppat.1004555.s014.pdf]

Subcellular (Non-plant)

**Table S4.** Predicted subcellular locations for high-confidence protein groups (protein probability: 1% false discovery rate,  $p \geq 0.95$ .) identified in the *T. brucei* acidocalcisome fractions (ACCS1 and ACCS2) from our prediction servers using non-plant based algorithms. Individual protein predictions are based upon agreement between at least two analysis packages. Consensus for identifications with multiple protein hits (see Methods for explanation of protein grouping based on degenerate peptide fingerprints) is given when prediction for a compartment agrees among two or more members of the group. S, secreted. C, cytosol. M, mitochondrion. N, nucleus. PM, plasma membrane. G, Golgi complex. ER, endoplasmic reticulum. P, peroxisome. L, lysosome. CYKS, cytoskeleton. Threshold probabilities and confidences used to screen our predictions with poor reliability: targetP (RC = 1). pTarget  $\geq 80\%$ , SLP-LOCAL  $\geq 2$ , WoLFPSort  $\geq 80\%$ . WoLFPSORT thresholds for each subcellular location were derived from empirical prediction confidence statistics (wolfsort.org/empiricalConfidenceByNumNeighbors/index.html, updated August 15, 2007).

| Protein Group | GeneID         | Description                                                                                       | Group Consensus | TargetP  |             | pTARGET  |            | SLP-LOCAL |             | WoLF-PSORT | Individual Consensus |
|---------------|----------------|---------------------------------------------------------------------------------------------------|-----------------|----------|-------------|----------|------------|-----------|-------------|------------|----------------------|
|               |                |                                                                                                   |                 | Location | Reliability | Location | Confidence | Location  | Reliability | Location   |                      |
| 1             | Tb927.6.3740   | heat shock 70 kDa protein, mitochondrial precursor, putative                                      | M               |          |             | M        | 81.4       |           |             | M          | M                    |
|               | Tb927.6.3750   | heat shock 70 kDa protein, mitochondrial precursor, putative                                      |                 |          |             | M        | 81.4       |           |             | M          | M                    |
|               | Tb927.6.3800   | heat shock 70 kDa protein, mitochondrial precursor, putative                                      |                 |          |             | M        | 81.4       |           |             | M          | M                    |
| 2             | Tb927.11.6280  | pyruvate phosphate dikinase                                                                       | C               |          |             | C        | 100        | NC        | 4           |            | C                    |
| 3             | Tb927.1.2330   | beta tubulin                                                                                      | C               |          |             | C        | 87.6       | NC        | 3           |            | C                    |
|               | Tb927.1.2350   | beta tubulin                                                                                      |                 |          |             | C        | 87.6       | NC        | 3           |            | C                    |
|               | Tb927.1.2370   | beta tubulin                                                                                      |                 |          |             | C        | 87.6       | NC        | 3           |            | C                    |
|               | Tb927.1.2390   | beta tubulin                                                                                      |                 |          |             | C        | 87.6       | NC        | 3           |            | C                    |
| 4             | Tb927.10.6400  | chaperonin HSP60, mitochondrial precursor                                                         | M               |          |             | M        | 93.9       | M         | 2           |            | M                    |
|               | Tb927.10.6510  | chaperonin HSP60, mitochondrial precursor                                                         |                 |          |             | M        | 93.9       | M         | 2           |            | M                    |
| 5             | Tb927.3.1380   | ATP synthase beta chain, mitochondrial precursor,ATP synthase F1, beta subunit                    | M               |          |             | M        | 93.9       | M         | 3           | M          | M                    |
| 6             | Tb927.2.4210   | glycosomal phosphoenolpyruvate carboxykinase                                                      |                 |          |             | P        | 81.4       |           |             |            |                      |
| 7             | Tb927.11.7460  | glucose-regulated protein 78, putative,luminal binding protein 1 (BiP), putative                  | S               | S        | 1           | M        | 81.4       | S         | 2           |            | S                    |
|               | Tb927.11.7510  | glucose-regulated protein 78, putative,luminal binding protein 1 (BiP), putative                  |                 | S        | 1           | M        | 81.4       | S         | 2           |            | S                    |
| 8             | Tb927.10.5620  | fructose-bisphosphate aldolase, glycosomal                                                        |                 |          |             | P        | 81.4       |           |             |            |                      |
| 9             | Tb927.1.2340   | alpha tubulin                                                                                     | C               |          |             | C        | 81.4       | NC        | 2           |            | C                    |
|               | Tb927.1.2360   | alpha tubulin                                                                                     |                 |          |             | C        | 81.4       | NC        | 2           |            | C                    |
|               | Tb927.1.2380   | alpha tubulin                                                                                     |                 |          |             | C        | 81.4       | NC        | 2           |            | C                    |
|               | Tb927.1.2400   | alpha tubulin                                                                                     |                 |          |             | C        | 81.4       | NC        | 2           |            | C                    |
| 10            | Tb927.6.4280   | glyceraldehyde 3-phosphate dehydrogenase, glycosomal                                              |                 |          |             | M        | 93.9       |           |             |            |                      |
|               | Tb927.6.4300   | glyceraldehyde 3-phosphate dehydrogenase, glycosomal                                              |                 |          |             | M        | 93.9       |           |             |            |                      |
| 11            | Tb927.8.3530   | glycerol-3-phosphate dehydrogenase [NAD], glycosomal                                              |                 |          |             |          |            |           |             |            |                      |
| 12            | Tb927.11.11330 | heat shock protein 70                                                                             | C               |          |             | C        | 87.6       | NC        | 3           |            | C                    |
| 13            | Tb927.11.9980  | 2-oxoglutarate dehydrogenase E1 component, putative                                               |                 |          |             | P        | 81.4       |           |             |            |                      |
| 14            | Tb927.10.15410 | glycosomal malate dehydrogenase                                                                   |                 |          |             | M        | 87.6       |           |             |            |                      |
| 15            | Tb927.9.12570  | glycerol kinase, glycosomal                                                                       |                 |          |             |          |            | NC        | 2           |            |                      |
| 16            | Tb927.5.930    | NADH-dependent fumarate reductase                                                                 |                 |          |             | P        | 100        | NC        | 2           |            |                      |
| 17            | Tb927.11.3980  | mitochondrial processing peptidase alpha subunit, putative,metallo-peptidase, Clan ME, Family M16 |                 |          |             | P        | 87.6       |           |             | M          |                      |
| 18            | Tb927.2.4230   | NUP-1 protein, putative                                                                           | N               |          |             | N        | 100        | NC        | 3           |            | N                    |
| 19            | Tb927.3.2230   | succinyl-CoA synthetase alpha subunit, putative                                                   | M               |          |             | M        | 100        | M         | 2           |            | M                    |
| 20            | Tb927.5.1060   | mitochondrial processing peptidase, beta subunit, putative,metallo-peptidase, Clan ME, Family M16 |                 |          |             | G        | 81.4       |           |             | M          |                      |
| 21            | Tb927.11.5520  | triosephosphate isomerase                                                                         | C               |          |             | C        | 87.6       | NC        | 2           |            | C                    |
| 22            | Tb927.4.2070   | antigenic protein, putative                                                                       | C               |          |             | C        | 87.6       | NC        | 4           |            | C                    |
| 23            | Tb927.11.11680 | 2-oxoglutarate dehydrogenase E2 component, putative                                               | M               |          |             | M        | 87.6       |           |             | M          | M                    |
| 24            | Tb927.10.8030  | hypothetical protein, conserved                                                                   | M               |          |             |          |            | M         | 2           |            | M                    |
| 25            | Tb927.10.7410  | succinyl-CoA ligase [GDP-forming] beta-chain, putative-with=GeneDB:LmjF36.2950                    | M               |          |             | M        | 87.6       |           |             | M          | M                    |
| 26            | Tb927.9.5900   | glutamate dehydrogenase                                                                           |                 |          |             |          |            |           |             | M          | M                    |
| 27            | Tb927.5.2930   | hypothetical protein, conserved                                                                   |                 |          |             | G        | 81.4       |           |             | N          |                      |
| 28            | Tb927.5.2080   | guanosine monophosphate reductase, putative                                                       | C               |          |             | C        | 100        | NC        | 3           |            | C                    |
| 29            | Tb927.9.5320   | nucleolar RNA binding protein, putative                                                           |                 |          |             | P        | 81.4       |           |             |            |                      |
| 30            | Tb927.8.2770   | inositol 1,4,5-trisphosphate receptor                                                             | C               |          |             | C        | 81.4       | NC        | 3           | PM         | C                    |
| 31            | Tb927.10.3210  | delta-1-pyrroline-5-carboxylate dehydrogenase, putative                                           |                 |          |             | P        | 87.6       |           |             |            |                      |
| 32            | Tb927.11.1020  | ribokinase, putative                                                                              | C               |          |             | C        | 87.6       | NC        | 2           |            | C                    |
| 33            | Tb927.11.2690  | succinyl-coA:3-ketoacid-coenzyme A transferase, mitochondrial precursor, putative                 |                 |          |             | P        | 87.6       |           |             |            |                      |
| 34            | Tb927.11.1450  | 2-oxoglutarate dehydrogenase E1 component, putative                                               | M               | M        | 1           | P        | 81.4       | M         | 2           |            | M                    |
| 35            | Tb927.10.14820 | mitochondrial carrier protein, putative,ADP/ATP translocase 1, putative                           |                 |          |             |          |            | NC        | 3           |            |                      |
|               | Tb927.10.14830 | mitochondrial carrier protein, putative,ADP/ATP translocase 1, putative                           |                 |          |             |          |            | NC        | 3           |            |                      |
|               | Tb927.10.14840 | mitochondrial carrier protein, putative,ADP/ATP translocase 1, putative                           |                 |          |             |          |            | NC        | 3           |            |                      |
| 36            | Tb927.10.14550 | ATP-dependent DEAD/H RNA helicase, putative                                                       |                 |          |             |          |            | NC        | 3           |            |                      |
| 37            | Tb927.10.2090  | elongation factor 1-alpha,EF-1-alpha                                                              | C               |          |             | C        | 100        |           |             | N          |                      |
|               | Tb927.10.2100  | elongation factor 1-alpha,EF-1-alpha                                                              |                 |          |             | C        | 93.9       | NC        | 2           | C          | C                    |
|               | Tb927.10.2110  | elongation factor 1-alpha                                                                         |                 |          |             | C        | 93.9       | NC        | 2           | C          | C                    |
| 38            | Tb927.7.7420   | ATP synthase alpha chain, mitochondrial precursor,ATP synthase F1, alpha subunit                  | M               |          |             | M        | 100        | M         | 3           | M          | M                    |
|               | Tb927.7.7430   | ATP synthase alpha chain, mitochondrial precursor,ATP synthase F1, alpha subunit                  |                 |          |             | M        | 100        | M         | 3           | M          | M                    |
| 39            | Tb927.10.2020  | hexokinase                                                                                        | C               |          |             | C        | 93.9       | NC        | 3           |            | C                    |
| 40            | Tb927.10.1510  | NOT1                                                                                              |                 |          |             | P        | 93.9       | NC        | 2           |            |                      |
| 41            | Tb927.2.1560   | cyclophilin-type peptidyl-prolyl cis-trans isomerase, putative                                    |                 |          |             |          |            |           |             |            |                      |
|               | Tb927.2.1680   | cyclophilin-type peptidyl-prolyl cis-trans isomerase, putative                                    |                 |          |             |          |            |           |             |            |                      |
| 42            | Tb927.3.3580   | lipophosphoglycan biosynthetic protein, putative                                                  | S               | S        | 1           | M        | 87.6       | S         | 3           |            | S                    |
| 43            | Tb927.3.1790   | pyruvate dehydrogenase E1 beta subunit, putative                                                  | M               |          |             | M        | 87.6       | M         | 3           | M          | M                    |
| 44            | Tb927.10.7570  | dihydrolipoamide acetyltransferase E2 subunit, putative                                           | M               |          |             | M        | 93.9       |           |             | M          | M                    |
| 45            | Tb927.5.3400   | calcium-translocating P-type ATPase,calcium pump                                                  |                 |          |             | P        | 100        | NC        | 3           |            |                      |
| 46            | Tb927.8.3750   | nucleolar protein, putative                                                                       |                 |          |             | C        | 87.6       |           |             |            |                      |
| 47            | Tb927.1.4100   | cytochrome oxidase subunit IV                                                                     | M               |          |             | N        | 81.4       | M         | 3           | M          | M                    |

## Subcellular (Non-plant)

|     |                |                                                                                                                                                                                                  |    |  |   |   |   |      |  |    |      |    |    |    |
|-----|----------------|--------------------------------------------------------------------------------------------------------------------------------------------------------------------------------------------------|----|--|---|---|---|------|--|----|------|----|----|----|
| 48  | Tb927.8.2540   | 3-ketoacyl-CoA thiolase, putative                                                                                                                                                                | M  |  |   |   | M | 93.9 |  |    |      | M  |    | M  |
| 49  | Tb927.8.5640   | hypothetical protein, conserved                                                                                                                                                                  | M  |  |   |   | M |      |  |    |      | M  |    | M  |
| 50  | Tb927.10.1170  | intraflagellar transport protein IFT172, putative                                                                                                                                                |    |  | M | 1 |   |      |  |    |      |    |    |    |
| 51  | Tb927.10.12700 | pyruvate dehydrogenase E1 alpha subunit, putative                                                                                                                                                | M  |  |   |   |   |      |  | M  | 2    |    |    | M  |
| 52  | Tb927.10.16120 | inosine-5'-monophosphate dehydrogenase,IMP dehydrogenase                                                                                                                                         |    |  |   |   |   |      |  |    |      |    |    |    |
| 53  | Tb927.9.11580  | Gim5A protein,glycosomal membrane protein                                                                                                                                                        | PM |  |   |   |   |      |  | NC | 3    |    |    |    |
|     | Tb927.9.11600  | Gim5B protein,glycosomal membrane protein                                                                                                                                                        |    |  |   |   |   |      |  | NC | 3    |    |    |    |
| 54  | Tb927.10.2010  | hexokinase                                                                                                                                                                                       | C  |  |   |   |   |      |  | NC | 3    |    | PM | PM |
| 55  | Tb927.8.1740   | hypothetical protein, conserved                                                                                                                                                                  |    |  |   |   |   |      |  |    |      |    |    |    |
| 56  | Tb927.8.6110   | hypothetical protein, conserved                                                                                                                                                                  | M  |  |   |   |   |      |  |    |      |    |    |    |
| 57  | Tb927.10.2560  | mitochondrial malate dehydrogenase                                                                                                                                                               |    |  |   |   |   |      |  | P  | 87.6 | M  | 2  | M  |
| 58  | Tb927.10.4560  | elongation factor 2                                                                                                                                                                              | C  |  |   |   |   |      |  | C  | 100  | NC | 4  | C  |
|     | Tb927.10.4570  | elongation factor 2                                                                                                                                                                              |    |  |   |   |   |      |  | C  | 100  | NC | 4  | C  |
| 59  | Tb927.6.2230   | hypothetical protein, conserved                                                                                                                                                                  | N  |  |   |   |   |      |  | N  | 87.6 | NC | 3  | N  |
| 60  | Tb927.10.8940  | hypothetical protein, conserved                                                                                                                                                                  | N  |  |   |   |   |      |  | N  | 93.9 | NC | 2  | N  |
| 61  | Tb927.10.7020  | acid phosphatase, putative                                                                                                                                                                       |    |  | S | 1 |   |      |  | G  | 87.6 |    |    |    |
| 62  | Tb927.6.4440   | hypothetical protein, conserved                                                                                                                                                                  | N  |  |   |   |   |      |  | N  | 93.9 | NC | 3  | N  |
| 63  | Tb927.8.6060   | 2-amino-3-ketobutyrate coenzyme A ligase, putative,glycine acetyltransferase, putative                                                                                                           | M  |  |   |   |   |      |  | M  | 93.9 | M  | 2  | M  |
| 64  | Tb927.6.2790   | L-threonine 3-dehydrogenase, putative                                                                                                                                                            |    |  |   |   |   |      |  | M  | 93.9 |    |    |    |
| 65  | Tb927.4.1300   | hypothetical protein, conserved                                                                                                                                                                  |    |  |   |   |   |      |  | P  | 87.6 | NC | 2  |    |
| 66  | Tb927.10.4310  | prohibitin 2, putative                                                                                                                                                                           |    |  |   |   |   |      |  | M  | 87.6 | NC | 2  |    |
| 67  | Tb927.9.14160  | rieske iron-sulfur protein, mitochondrial precursor                                                                                                                                              |    |  |   |   |   |      |  | G  | 93.9 | M  | 2  |    |
| 68  | Tb927.1.120    | retrotransposon hot spot protein 4 (RHS4), putative                                                                                                                                              | C  |  |   |   |   |      |  | C  | 81.4 | NC | 5  | C  |
| 69  | Tb927.10.2350  | pyruvate dehydrogenase complex E3 binding protein, putative                                                                                                                                      |    |  |   |   |   |      |  | M  | 81.4 |    |    |    |
| 70  | Tb927.10.180   | ATP synthase F1 subunit gamma protein, putative                                                                                                                                                  |    |  |   |   |   |      |  |    |      | NC | 3  |    |
| 71  | Tb927.3.3900   | carnitine O-palmitoyltransferase II, putative                                                                                                                                                    |    |  |   |   |   |      |  | G  | 100  |    |    | M  |
| 72  | Tb927.2.3030   | ATP-dependent Clp protease subunit, heat shock protein 78 (HSP78), putative,serine peptidase, putative                                                                                           | M  |  |   |   |   |      |  | M  | 87.6 |    |    | M  |
| 73  | Tb927.3.3270   | ATP-dependent phosphofructokinase                                                                                                                                                                |    |  |   |   |   |      |  | P  | 93.9 |    |    |    |
| 74  | Tb927.10.2240  | hypothetical protein, conserved                                                                                                                                                                  |    |  |   |   |   |      |  |    |      |    |    |    |
| 75  | Tb927.11.16730 | dihydrolipoyl dehydrogenase                                                                                                                                                                      |    |  |   |   |   |      |  | C  | 87.6 |    |    |    |
| 76  | Tb927.9.12510  | ATP-dependent DEAD/H RNA helicase, putative                                                                                                                                                      | N  |  |   |   |   |      |  | N  | 100  | NC | 3  | N  |
| 77  | Tb927.3.5050   | 60S ribosomal protein L4                                                                                                                                                                         | N  |  |   |   |   |      |  | N  | 93.9 | NC | 2  | N  |
| 78  | Tb927.4.4380   | vacuolar-type proton translocating pyrophosphatase 1, putative                                                                                                                                   | S  |  | S | 1 |   |      |  |    |      | S  | 2  | PM |
|     | Tb927.8.7980   | vacuolar-type proton translocating pyrophosphatase 1,V-type H(-)-translocating pyrophosphatase                                                                                                   |    |  | S | 1 |   |      |  |    |      | S  | 2  | PM |
| 79  | Tb927.9.5150   | ribosomal protein S6, putative,NHP2/RS6-like protein                                                                                                                                             | C  |  |   |   |   |      |  | C  | 93.9 | NC | 4  | C  |
| 80  | Tb927.4.3950   | cytoskeleton-associated protein CAP5.5, putative,cysteine peptidase, Clan CA, family C2, putative                                                                                                |    |  |   |   |   |      |  |    |      | NC | 3  |    |
| 81  | Tb927.3.3130   | hypothetical protein, conserved                                                                                                                                                                  |    |  |   |   |   |      |  |    |      |    |    |    |
| 82  | Tb927.9.6100   | TFIIIF-stimulated CTD phosphatase, putative                                                                                                                                                      |    |  |   |   |   |      |  | M  | 100  |    |    |    |
| 83  | Tb927.8.6170   | transketolase, putative                                                                                                                                                                          |    |  |   |   |   |      |  | P  | 100  | NC | 2  |    |
| 84  | Tb927.3.930    | dynein heavy chain, putative                                                                                                                                                                     |    |  |   |   |   |      |  | P  | 81.4 | NC | 2  |    |
| 85  | Tb927.10.14750 | fibrillarin, putative                                                                                                                                                                            | N  |  |   |   |   |      |  | N  | 93.9 | NC | 2  | N  |
| 86  | Tb927.9.6090   | TFIIIF-stimulated CTD phosphatase, putative                                                                                                                                                      |    |  |   |   |   |      |  | M  | 100  |    |    |    |
| 87  | Tb927.11.2650  | heat shock protein 84, putative                                                                                                                                                                  |    |  |   |   |   |      |  | M  | 93.9 | M  | 3  | M  |
| 88  | Tb927.11.13180 | hypothetical protein, conserved                                                                                                                                                                  | M  |  | M | 1 |   |      |  | M  | 100  | NC | 2  |    |
| 89  | Tb927.9.10770  | Polyadenylate-binding protein 2 (Poly(A)-binding protein 2) (Poly(A)-binding protein II) (PABII) (Polyadenylate-binding nuclear protein 1) (Nuclear poly(A)-binding protein 1) (PABP2), putative |    |  |   |   |   |      |  | P  | 81.4 | NC | 2  |    |
| 90  | Tb927.8.6580   | succinate dehydrogenase flavoprotein, putative                                                                                                                                                   | M  |  |   |   |   |      |  | P  | 81.4 | M  | 2  | M  |
| 91  | Tb927.11.7380  | glycerol-3-phosphate dehydrogenase (FAD-dependent), mitochondrial                                                                                                                                |    |  |   |   |   |      |  | M  | 81.4 |    |    |    |
| 92  | Tb927.9.2470   | nucleolar protein                                                                                                                                                                                | C  |  |   |   |   |      |  | C  | 87.6 | NC | 4  | C  |
| 93  | Tb927.8.1160   | vacuolar-type Ca2 -ATPase, putative                                                                                                                                                              |    |  |   |   |   |      |  | M  | 87.6 | NC | 3  | PM |
| 94  | Tb927.7.2700   | NADH-cytochrome b5 reductase, putative                                                                                                                                                           |    |  |   |   |   |      |  | P  | 87.6 |    |    |    |
| 95  | Tb927.10.470   | choline dehydrogenase, putative                                                                                                                                                                  |    |  |   |   |   |      |  | P  | 81.4 |    |    |    |
| 96  | Tb927.8.1180   | vacuolar-type Ca2 -ATPase 1                                                                                                                                                                      |    |  |   |   |   |      |  | P  | 87.6 | NC | 4  | PM |
| 97  | Tb927.11.13280 | mitochondrial RNA binding protein 2                                                                                                                                                              |    |  |   |   |   |      |  | G  | 87.6 |    |    | M  |
| 98  | Tb927.5.1210   | short-chain dehydrogenase, putative                                                                                                                                                              | S  |  | S | 1 |   |      |  | ER | 93.9 | S  | 2  | S  |
| 99  | Tb927.6.2170   | co-chaperone GrpE, putative                                                                                                                                                                      |    |  |   |   |   |      |  | M  | 81.4 | M  | 4  | M  |
| 100 | Tb927.7.6360   | histone H2A variant                                                                                                                                                                              | M  |  | M | 1 |   |      |  | P  | 93.9 | NC | 3  |    |
| 101 | Tb927.10.12500 | P-type H -ATPase, putative                                                                                                                                                                       |    |  |   |   |   |      |  |    |      | NC | 5  | PM |
| 102 | Tb927.5.3810   | orotidine-5-phosphate decarboxylase/orotate phosphoribosyltransferase, putative,OMPDCase-OPRTase, putative                                                                                       |    |  |   |   |   |      |  | G  | 87.6 |    |    |    |
| 103 | Tb927.10.13510 | zinc metallopeptidase, putative                                                                                                                                                                  |    |  |   |   |   |      |  | M  | 87.6 | NC | 3  |    |
| 104 | Tb927.5.520    | stomatol-like protein, putative                                                                                                                                                                  |    |  |   |   |   |      |  | L  | 87.6 | S  | 2  |    |
| 105 | Tb927.11.3250  | dynein heavy chain, putative                                                                                                                                                                     |    |  |   |   |   |      |  | C  | 93.9 | NC | 6  | C  |
| 106 | Tb927.10.11310 | intraflagellar transport protein IFT55/IFT57, putative                                                                                                                                           | C  |  |   |   |   |      |  | C  | 100  | NC | 6  | C  |
| 107 | Tb927.8.3060   | cytosolic leucyl aminopeptidase, putative,metallo-peptidase, Clan MF, Family M17                                                                                                                 |    |  |   |   |   |      |  | P  | 81.4 |    |    |    |
| 108 | Tb927.8.1330   | 60S ribosomal protein L7a, putative                                                                                                                                                              |    |  |   |   |   |      |  | N  | 87.6 | NC | 3  | N  |
|     | Tb927.8.1340   | 60S ribosomal protein L7a, putative                                                                                                                                                              |    |  |   |   |   |      |  | N  | 87.6 | NC | 3  | N  |
| 109 | Tb927.10.6910  | Sterol methyltransferase, putative                                                                                                                                                               |    |  |   |   |   |      |  |    |      |    |    |    |
|     | Tb927.10.6950  | sterol 24-c-methyltransferase, putative                                                                                                                                                          |    |  |   |   |   |      |  |    |      |    |    |    |
| 110 | Tb927.9.9660   | hypothetical protein, conserved                                                                                                                                                                  |    |  |   |   |   |      |  |    |      | NC | 6  |    |
| 111 | Tb927.2.2510   | voltage-dependent anion-selective channel                                                                                                                                                        |    |  |   |   |   |      |  |    |      | NC | 3  |    |
|     | Tb927.2.2520   | voltage-dependent anion-selective channel                                                                                                                                                        |    |  |   |   |   |      |  |    |      | NC | 3  |    |
| 112 | Tb927.11.6460  | hypothetical protein, conserved                                                                                                                                                                  |    |  |   |   |   |      |  | P  | 81.4 |    |    | PM |
| 113 | Tb927.7.6670   | hypothetical protein, conserved                                                                                                                                                                  |    |  |   |   |   |      |  | G  | 81.4 |    |    |    |



Subcellular (Non-plant)

|     |                |                                                                                                                       |    |  |   |    |      |    |   |  |    |    |
|-----|----------------|-----------------------------------------------------------------------------------------------------------------------|----|--|---|----|------|----|---|--|----|----|
| 180 | Tb927.10.3260  | Long-chain-fatty-acid-CoA ligase 5 (EC 6.2.1.3) (Long-chain acyl-CoA synthetase 5) (LACS 5), putative                 | C  |  |   | C  | 93.9 | NC | 2 |  |    | C  |
| 181 | Tb927.3.2180   | hypothetical protein, conserved                                                                                       |    |  |   | M  | 81.4 |    |   |  |    |    |
| 182 | Tb927.10.560   | 40S ribosomal proteins S11, putative                                                                                  | NC |  |   | N  | 93.9 | NC | 3 |  | C  | NC |
| 183 | Tb927.7.4770   | cyclophilin-type peptidyl-prolyl cis-trans isomerase, putative                                                        | C  |  |   | C  | 81.4 | NC | 3 |  |    | C  |
| 184 | Tb927.11.550   | hypothetical protein SCD6.10                                                                                          |    |  |   |    |      |    |   |  | M  |    |
| 185 | Tb927.8.890    | small GTP-binding protein Rab1, putative                                                                              |    |  |   |    |      |    |   |  |    |    |
| 186 | Tb927.7.2570   | mRNA processing protein, putative                                                                                     | M  |  | M | G  | 93.9 | M  | 2 |  | M  | M  |
| 187 | Tb927.10.15180 | nucleosome assembly protein, putative                                                                                 | C  |  |   | C  | 93.9 | NC | 6 |  |    | C  |
| 188 | Tb927.11.1430  | hypothetical protein, conserved                                                                                       | C  |  |   | C  | 81.4 | NC | 3 |  |    | C  |
| 189 | Tb927.9.9550   | hypothetical protein, conserved                                                                                       | N  |  |   | N  | 100  | NC | 6 |  | N  | N  |
| 190 | Tb927.4.5010   | calreticulin, putative                                                                                                |    |  | S |    |      |    |   |  |    |    |
|     | Tb927.8.7410   | calreticulin, putative                                                                                                |    |  | S |    |      |    |   |  |    |    |
| 191 | Tb927.7.3740   | hypothetical protein, conserved                                                                                       | N  |  |   | N  | 93.9 | NC | 5 |  |    | N  |
| 192 | Tb927.10.9570  | paraflagellar rod component, putative                                                                                 | C  |  |   | C  | 93.9 | NC | 3 |  |    | C  |
| 193 | Tb927.8.1570   | hypothetical protein, conserved                                                                                       |    |  |   |    |      | NC | 3 |  |    |    |
| 194 | Tb927.10.6180  | hypothetical protein, conserved                                                                                       | S  |  | S | PM | 81.4 | S  | 4 |  |    | S  |
| 195 | Tb927.10.1390  | hypoxanthine-guanine phosphoribosyltransferase, putative                                                              | C  |  |   | P  | 93.9 | NC | 3 |  | C  | C  |
| 196 | Tb927.11.12220 | vacuolar transporter chaperone 4                                                                                      |    |  |   |    |      | NC | 3 |  | PM |    |
| 197 | Tb927.8.6660   | paraflagellar rod component, putative                                                                                 | N  |  |   | N  | 93.9 | NC | 4 |  |    | N  |
| 198 | Tb927.8.4780   | hypothetical protein, conserved                                                                                       | N  |  |   | N  | 100  | NC | 3 |  |    | N  |
| 199 | Tb927.3.3460   | hypothetical protein, conserved                                                                                       | M  |  |   | M  | 81.4 | M  | 2 |  | M  | M  |
| 200 | Tb927.11.9080  | hypothetical protein, conserved                                                                                       | C  |  |   | C  | 93.9 | NC | 6 |  |    | C  |
| 201 | Tb927.11.14130 | ribosomal protein L18, putative                                                                                       | N  |  |   | N  | 81.4 | NC | 2 |  |    | N  |
|     | Tb927.10.3840  | 60S ribosomal protein L18a, putative                                                                                  |    |  |   | N  | 81.4 | NC | 2 |  |    | N  |
| 202 | Tb927.10.4880  | hypothetical protein, conserved                                                                                       |    |  |   | G  | 93.9 |    |   |  |    |    |
| 203 | Tb927.9.11220  | hypothetical protein, conserved                                                                                       |    |  |   | P  | 81.4 | NC | 2 |  |    |    |
| 204 | Tb927.8.3870   | hypothetical protein, conserved                                                                                       | N  |  |   | N  | 87.6 | NC | 4 |  | N  | N  |
| 205 | Tb927.2.5160   | chaperone protein DNAJ, putative                                                                                      | C  |  |   | C  | 100  | NC | 6 |  |    | C  |
| 206 | Tb927.10.240   | peroxin 14, putative                                                                                                  | N  |  |   | N  | 100  | NC | 5 |  |    | N  |
| 207 | Tb927.10.8230  | protein disulfide isomerase,bloodstream- specific protein 2 precursor                                                 |    |  |   | ER | 93.9 |    |   |  |    |    |
| 208 | Tb927.6.4210   | aldehyde dehydrogenase, putative                                                                                      |    |  |   |    |      |    |   |  |    |    |
| 209 | Tb927.6.3150   | Hydin,flagellar component                                                                                             |    |  |   |    |      |    |   |  |    |    |
| 210 | Tb927.10.7090  | alternative oxidase                                                                                                   |    |  |   | P  | 93.9 | NC | 2 |  |    |    |
| 211 | Tb927.11.1710  | mitochondrial RNA binding protein 1.gBP21, MRP1                                                                       | M  |  |   | M  | 100  | M  | 3 |  | M  | M  |
| 212 | Tb927.3.1810   | hypothetical protein, conserved                                                                                       |    |  |   |    |      |    |   |  |    |    |
| 213 | Tb927.9.9450   | hypothetical protein, conserved,zinc finger protein family member, putative                                           | N  |  |   | N  | 100  | NC | 2 |  |    | N  |
| 214 | Tb927.11.8160  | dynein heavy chain, putative                                                                                          | C  |  |   | C  | 87.6 | NC | 7 |  |    | C  |
| 215 | Tb927.4.3590   | translation elongation factor 1-beta, putative                                                                        |    |  |   | C  | 87.6 |    |   |  |    |    |
| 216 | Tb927.9.2450   | electron transport protein SCO1/SCO2, putative                                                                        | C  |  |   | C  | 81.4 | NC | 5 |  |    | C  |
| 217 | Tb927.3.2440   | serine/threonine-protein kinase, putative,protein kinase, putative                                                    | N  |  |   | P  | 81.4 | NC | 6 |  | N  | N  |
| 218 | Tb927.9.4190   | fatty acyl CoA syntetase 1                                                                                            |    |  |   | G  | 93.9 |    |   |  |    |    |
| 219 | Tb927.4.4070   | mevalonate kinase, putative                                                                                           | C  |  |   | C  | 100  | NC | 3 |  |    | C  |
| 220 | Tb927.10.2530  | adenylate kinase, putative                                                                                            | C  |  |   | C  | 100  | NC | 2 |  | C  | C  |
| 221 | Tb927.5.500    | hypothetical protein, conserved                                                                                       |    |  |   | N  | 87.6 |    |   |  |    |    |
| 222 | Tb927.2.3800   | mRNA processing protein, putative                                                                                     | M  |  | M | M  | 93.9 | M  | 2 |  |    | M  |
| 223 | Tb927.7.2170   | hypothetical protein, conserved                                                                                       | N  |  |   | N  | 87.6 | NC | 2 |  | N  | N  |
| 224 | Tb927.8.1990   | peroxidoxin                                                                                                           | M  |  | M | M  | 81.4 | M  | 3 |  | M  | M  |
| 225 | Tb927.10.12840 | mitochondrial carrier protein, putative,mitochondrial 2-oxoglutarate/malate carrier protein, putative                 |    |  |   |    |      |    |   |  |    |    |
| 226 | Tb927.7.2390   | hypothetical protein, conserved                                                                                       | N  |  |   | N  | 100  | NC | 2 |  |    | N  |
| 227 | Tb927.4.1330   | DNA topoisomerase IB, large subunit                                                                                   | C  |  |   | C  | 100  | NC | 3 |  |    | C  |
| 228 | Tb927.11.12230 | heat shock protein HslVU, ATPase subunit HslU, putative,ATP-dependent hsl protease ATP-binding subunit hslU, putative |    |  |   | M  | 87.6 |    |   |  |    |    |
| 229 | Tb927.8.3690   | isocitrate dehydrogenase [NADP], mitochondrial precursor, putative                                                    | M  |  | M | M  | 87.6 | M  | 2 |  | M  | M  |
| 230 | Tb927.11.15040 | chaperonin HSP60, mitochondrial precursor, putative,heat shock protein 60                                             |    |  |   | M  | 87.6 |    |   |  |    |    |
| 231 | Tb927.6.3050   | aldehyde dehydrogenase family, putative                                                                               | C  |  |   | C  | 93.9 | NC | 4 |  |    | C  |
| 232 | Tb927.8.5120   | cytochrome c                                                                                                          |    |  |   | P  | 93.9 | NC | 3 |  |    |    |
| 233 | Tb927.6.1500   | alkyl-dihydroxyacetone phosphate synthase                                                                             | C  |  |   | C  | 81.4 | NC | 5 |  |    | C  |
| 234 | Tb927.2.5660   | adenylate kinase, putative                                                                                            | C  |  |   | C  | 93.9 | NC | 2 |  |    | C  |
| 235 | Tb927.10.5770  | valosin-containing protein homolog,Transitional endoplasmic reticulum ATPase, putative                                | C  |  |   | C  | 93.9 | NC | 4 |  |    | C  |
| 236 | Tb927.11.5290  | mitochondrial carrier protein, putative                                                                               |    |  |   | PM | 93.9 |    |   |  |    |    |
| 237 | Tb927.9.5690   | 60S acidic ribosomal protein, putative                                                                                |    |  |   | P  | 87.6 |    |   |  |    |    |
| 238 | Tb927.11.6140  | 40S ribosomal protein S15A, putative                                                                                  |    |  |   | P  | 81.4 |    |   |  |    |    |
| 239 | Tb927.11.600   | hypothetical protein, conserved                                                                                       |    |  |   | M  | 81.4 |    |   |  |    |    |
| 240 | Tb927.2.5800   | sedoheptulose-1,7-bisphosphatase                                                                                      |    |  |   | P  | 81.4 |    |   |  |    |    |
| 241 | Tb927.4.2080   | hypothetical protein, conserved                                                                                       | N  |  |   | N  | 93.9 | NC | 6 |  |    | N  |
| 242 | Tb927.10.8780  | hypothetical protein, conserved                                                                                       | C  |  |   | C  | 93.9 | NC | 4 |  |    | C  |
| 243 | Tb927.10.15750 | hypothetical protein, conserved                                                                                       | N  |  |   | N  | 87.6 | NC | 2 |  |    | N  |
| 244 | Tb927.9.4500   | heat shock protein, putative,HSP70-like protein                                                                       | S  |  | S |    |      | S  | 5 |  |    | S  |
| 245 | Tb927.9.4680   | ATP-dependent DEAD box helicase, putative                                                                             | NC |  |   | C  | 93.9 | NC | 7 |  | N  | NC |
| 246 | Tb927.4.870    | dynein heavy chain, putative                                                                                          |    |  |   | G  | 93.9 |    |   |  |    |    |
| 247 | Tb927.10.5760  | adenylate kinase, putative                                                                                            |    |  |   | M  | 87.6 | NC | 3 |  |    |    |
| 248 | Tb927.10.13180 | hypothetical protein, conserved                                                                                       |    |  |   |    |      | NC | 4 |  |    |    |
| 249 | Tb927.11.14780 | phosphomannose isomerase, putative                                                                                    | C  |  |   | C  | 93.9 | NC | 3 |  |    | C  |

Subcellular (Non-plant)

|     |                |                                                                                        |   |   |   |  |    |      |    |   |  |    |   |
|-----|----------------|----------------------------------------------------------------------------------------|---|---|---|--|----|------|----|---|--|----|---|
| 250 | Tb927.2.2940   | hypothetical protein, conserved                                                        | N |   |   |  | N  | 87.6 | NC | 4 |  |    | N |
| 251 | Tb927.10.10360 | microtubule-associated protein, putative                                               | N |   |   |  | N  | 100  | NC | 8 |  |    | N |
| 252 | Tb927.4.1360   | hypothetical protein, conserved                                                        | C |   |   |  | M  | 93.9 | NC | 2 |  |    | C |
| 253 | Tb927.11.15150 | 1-acyl-sn-glycerol-3-phosphate acyltransferase, putative                               | S | S | 1 |  | ER | 100  | S  | 4 |  | C  | C |
| 254 | Tb927.10.8200  | hypothetical protein, conserved                                                        | N |   |   |  | N  | 81.4 | NC | 3 |  |    | S |
| 255 | Tb927.7.4900   | 5'-3' exonuclease XRNA, putative,exoribonuclease 1, putative                           | N |   |   |  | G  | 87.6 | NC | 3 |  |    | N |
| 256 | Tb927.9.5960   | succinate dehydrogenase, putative                                                      |   |   |   |  | S  | 87.6 |    |   |  |    |   |
| 257 | Tb927.11.9400  | hypothetical protein, conserved                                                        | C |   |   |  | C  | 100  | NC | 5 |  |    | C |
| 258 | Tb927.7.210    | proline dehydrogenase                                                                  | M |   |   |  | M  | 87.6 | M  | 2 |  | M  | M |
| 259 | Tb927.11.8870  | mitochondrial DEAD box protein,KREH1                                                   | M |   |   |  | G  | 87.6 | M  | 3 |  | M  | M |
| 260 | Tb927.11.1980  | hypothetical protein, conserved,zinc finger protein family member, putative            | M | M | 1 |  | P  | 87.6 | NC | 3 |  |    |   |
| 261 | Tb927.4.4910   | 3,2-trans-enoyl-CoA isomerase, mitochondrial precursor, putative                       |   |   |   |  | G  | 93.9 |    |   |  |    |   |
| 262 | Tb927.10.16150 | ATP-dependent zinc metallopeptidase, putative,metallo-peptidase, Clan MA(E) Family M41 |   |   |   |  | P  | 87.6 | NC | 3 |  |    |   |
| 263 | Tb927.11.8050  | hypothetical protein, conserved                                                        | N |   |   |  | N  | 100  | NC | 7 |  | N  | N |
| 264 | Tb927.10.2950  | hypothetical protein, conserved                                                        |   |   |   |  | G  | 81.4 |    |   |  |    |   |
| 265 | Tb927.8.1550   | paraflagellar rod component, putative                                                  | N |   |   |  | N  | 93.9 | NC | 3 |  |    | N |
| 266 | Tb927.5.4420   | nucleolar RNA helicase II, putative,nucleolar RNA helicase Gu, putative                | C |   |   |  | C  | 93.9 | NC | 5 |  |    | C |
| 267 | Tb927.10.770   | hypothetical protein, conserved                                                        | M | M | 1 |  | M  | 81.4 |    |   |  | M  | M |
| 268 | Tb927.11.3360  | hypothetical protein, conserved                                                        |   |   |   |  |    |      | NC | 2 |  |    |   |
| 269 | Tb927.6.4980   | 40S ribosomal protein S14                                                              | N |   |   |  | N  | 87.6 | NC | 5 |  |    | N |
| 270 | Tb927.10.10280 | microtubule-associated protein, putative                                               | N |   |   |  | N  | 100  | NC | 8 |  |    | N |
| 271 | Tb927.3.1840   | 3-oxo-5-alpha-steroid 4-dehydrogenase, putative                                        |   |   |   |  | P  | 87.6 | NC | 4 |  |    |   |
| 272 | Tb927.11.4450  | hypothetical protein, conserved                                                        |   |   |   |  | P  | 87.6 | NC | 3 |  |    |   |
| 273 | Tb927.7.3370   | hypothetical protein, conserved                                                        | N |   |   |  | N  | 93.9 | NC | 2 |  | N  | N |
| 274 | Tb927.8.4400   | hypothetical protein, conserved                                                        |   |   |   |  | N  | 93.9 |    |   |  |    |   |
| 275 | Tb927.11.10760 | kinesin-like protein, putative                                                         |   |   |   |  | P  | 93.9 | NC | 2 |  |    |   |
| 276 | Tb927.10.9780  | ATP-dependent DEAD/H RNA helicase, putative,ATP- dependent RNA helicase, putative      | N |   |   |  | N  | 100  | NC | 2 |  | N  | N |
| 277 | Tb927.11.16510 | hypothetical protein, conserved                                                        |   |   |   |  | M  | 87.6 |    |   |  |    |   |
| 278 | Tb927.11.17000 | hypothetical protein, conserved,leucine-rich repeat protein (LRRP), putative           |   |   |   |  | P  | 87.6 | NC | 2 |  |    |   |
| 279 | Tb927.9.15360  | 40S ribosomal protein S6, putative                                                     |   |   |   |  | P  | 100  | NC | 5 |  |    |   |
| 280 | Tb927.10.170   | pseudouridine synthase, Cbf5p                                                          | C |   |   |  | P  | 87.6 | NC | 4 |  | C  | C |
| 281 | Tb927.3.5570   | syntaxin, putative                                                                     | C |   |   |  | C  | 87.6 | NC | 3 |  |    | C |
| 282 | Tb927.10.6630  | ATP-dependent DEAD/H RNA helicase HEL64, putative                                      | N |   |   |  | N  | 81.4 | NC | 5 |  | N  | N |
| 283 | Tb927.8.2740   | mitochondrial RNA binding protein                                                      |   |   |   |  | P  | 81.4 |    |   |  |    |   |
| 284 | Tb927.10.2770  | eukaryotic translation initiation factor 5, putative                                   | C |   |   |  | C  | 100  | NC | 5 |  |    | C |
| 285 | Tb927.7.3980   | immunodominant antigen, putative,tc40 antigen-like                                     | N |   |   |  | N  | 87.6 | NC | 5 |  |    | N |
| 286 | Tb927.3.3590   | U3 small nucleolar ribonucleoprotein protein MPP10, putative                           | N |   |   |  | N  | 87.6 | NC | 4 |  |    | N |
| 287 | Tb927.11.11540 | DNA topoisomerase II, putative                                                         | C |   |   |  | C  | 100  | NC | 5 |  |    | C |
| 288 | Tb927.7.1290   | hypothetical protein, conserved                                                        | S | S | 1 |  |    |      | S  | 3 |  |    | S |
| 289 | Tb927.11.2790  | hypothetical protein, conserved                                                        | N |   |   |  | N  | 93.9 | NC | 3 |  |    | N |
| 290 | Tb927.8.2000   | cyclophilin, putative                                                                  |   |   |   |  |    |      |    |   |  |    |   |
| 291 | Tb927.8.1860   | pitriylisin-like metalloprotease,metallo-peptidase, Clan ME, Family M16C               |   |   |   |  |    |      |    |   |  | M  |   |
| 292 | Tb927.11.6210  | sterol 14-alpha-demethylase                                                            | S | S | 1 |  |    |      | S  | 4 |  | ER | S |
| 293 | Tb927.6.4130   | hypothetical protein, conserved                                                        | M |   |   |  | M  | 100  |    |   |  | M  | M |
| 294 | Tb927.9.13990  | RNA-binding protein, putative                                                          | N |   |   |  | N  | 87.6 | NC | 7 |  | S  | N |
| 295 | Tb927.6.2050   | ribosome biogenesis regulatory protein (RRS1), putative                                |   |   |   |  |    |      | NC | 2 |  |    |   |
| 296 | Tb927.4.410    | CAF 40                                                                                 |   |   |   |  |    |      | NC | 3 |  |    |   |
| 297 | Tb927.7.280    | cyclophilin-type peptidyl-prolyl cis-trans isomerase, putative                         |   |   |   |  | PM | 87.6 |    |   |  |    |   |
| 298 | Tb927.10.6050  | clathrin heavy chain                                                                   |   |   |   |  | P  | 81.4 | NC | 2 |  |    |   |
| 299 | Tb927.9.14200  | hypothetical protein, conserved                                                        |   |   |   |  | G  | 87.6 | M  | 2 |  |    |   |
| 300 | Tb927.3.5020   | hypothetical protein, conserved                                                        |   |   |   |  | P  | 87.6 | NC | 3 |  |    |   |
| 301 | Tb927.8.6390   | lysophospholipase, putative,alpha/beta hydrolase, putative                             |   |   |   |  | P  | 81.4 | NC | 4 |  |    |   |
| 302 | Tb927.11.6050  | hypothetical protein, conserved                                                        |   |   |   |  | N  | 87.6 | NC | 3 |  |    |   |
| 303 | Tb927.2.4550   | FtsJ cell division protein, putative                                                   | N |   |   |  | N  | 93.9 | NC | 3 |  | PM | N |
| 304 | Tb927.9.15330  | hypothetical protein, conserved                                                        | N |   |   |  | N  | 93.9 | NC | 2 |  |    | N |
| 305 | Tb927.11.5220  | chaperone protein DNAJ, putative                                                       | S | S | 1 |  |    |      | S  | 3 |  | S  | S |
| 306 | Tb927.11.3500  | hypothetical protein, conserved                                                        |   |   |   |  |    |      | NC | 4 |  |    |   |
| 307 | Tb927.6.1470   | hypothetical protein, conserved                                                        | N |   |   |  | N  | 93.9 | NC | 5 |  | N  | N |
| 308 | Tb927.1.1700   | hypothetical protein, conserved                                                        | N |   |   |  | N  | 100  | NC | 4 |  |    | N |
| 309 | Tb927.2.5130   | hypothetical protein, conserved                                                        | C |   |   |  | C  | 87.6 | NC | 4 |  |    | C |
| 310 | Tb927.8.2630   | kinesin, putative                                                                      | N |   |   |  | N  | 100  | NC | 4 |  |    | N |
| 311 | Tb927.11.6300  | 40S ribosomal protein S5, putative                                                     | C |   |   |  | C  | 87.6 |    |   |  | C  | C |
| 312 | Tb927.9.1750   | hypothetical protein, conserved                                                        | C |   |   |  | C  | 81.4 | NC | 3 |  | C  | C |
| 313 | Tb927.9.11000  | small GTPase, putative,GTP-binding protein, putative                                   |   |   |   |  | G  | 93.9 | NC | 2 |  |    |   |
| 314 | Tb927.9.11850  | structural maintenance of chromosome 1, putative                                       | N |   |   |  | N  | 93.9 | NC | 2 |  |    | N |
| 315 | Tb927.10.4760  | hypothetical protein, conserved                                                        |   |   |   |  |    |      |    |   |  |    |   |
| 316 | Tb927.6.3890   | replication factor C, subunit 2, putative                                              |   |   |   |  |    |      |    |   |  | S  |   |
| 317 | Tb927.11.16480 | enoyl-CoA hydratase/isomerase family protein, putative                                 | C |   |   |  | C  | 93.9 | NC | 5 |  |    | C |
| 318 | Tb927.7.2190   | hypothetical protein, conserved                                                        |   |   |   |  |    |      |    |   |  |    |   |
| 319 | Tb927.7.3430   | cyclophilin-type peptidyl-prolyl cis-trans isomerase, putative                         |   | S | 1 |  |    |      | S  | 2 |  |    |   |
| 320 | Tb927.11.3770  | hypothetical protein, conserved                                                        |   |   |   |  | P  | 81.4 |    |   |  |    |   |
| 321 | Tb927.7.3330   | hypothetical protein, conserved                                                        | N |   |   |  | N  | 93.9 | NC | 6 |  |    | N |







Subcellular (Non-plant)

|     |                |                                                                                                   |  |   |   |    |  |  |    |      |  |    |   |  |    |  |    |
|-----|----------------|---------------------------------------------------------------------------------------------------|--|---|---|----|--|--|----|------|--|----|---|--|----|--|----|
| 538 | Tb927.6.5090   | hypothetical protein, conserved                                                                   |  |   |   | PM |  |  | PM | 81.4 |  | NC | 5 |  | PM |  | PM |
| 539 | Tb927.11.460   | hypothetical protein, conserved,predicted WD40 repeat protein                                     |  |   |   |    |  |  |    |      |  | NC | 2 |  |    |  |    |
| 540 | Tb927.11.11250 | cytosolic malate dehydrogenase                                                                    |  |   |   |    |  |  |    |      |  | NC | 2 |  |    |  |    |
| 541 | Tb927.6.1550   | hypothetical protein, conserved,leucine-rich repeat protein (LRRP), putative                      |  |   |   |    |  |  | PM | 87.6 |  | NC | 3 |  |    |  |    |
| 542 | Tb927.7.540    | chaperone protein DNAj, putative                                                                  |  |   |   |    |  |  |    |      |  | NC | 2 |  |    |  |    |
| 543 | Tb927.7.5320   | hypothetical protein, conserved                                                                   |  |   |   |    |  |  | C  | 81.4 |  | NC | 3 |  |    |  | C  |
| 544 | Tb927.10.14720 | peroxin 13                                                                                        |  |   |   |    |  |  | N  | 100  |  | NC | 3 |  |    |  | N  |
| 545 | Tb927.4.1600   | hypothetical protein, conserved                                                                   |  |   |   |    |  |  | G  | 81.4 |  |    |   |  |    |  |    |
| 546 | Tb927.9.3370   | thioredoxin                                                                                       |  |   |   |    |  |  | C  | 100  |  | NC | 2 |  |    |  | C  |
| 547 | Tb927.10.10800 | hypothetical protein, conserved                                                                   |  |   |   |    |  |  | S  | 81.4 |  | S  | 2 |  |    |  | S  |
| 548 | Tb927.7.3810   | hypothetical protein, conserved                                                                   |  | S | 1 |    |  |  | ER | 81.4 |  |    |   |  | PM |  |    |
| 549 | Tb927.10.7700  | ABC transporter, putative                                                                         |  |   |   |    |  |  | G  | 81.4 |  |    |   |  | M  |  |    |
| 550 | Tb927.8.8120   | hypothetical protein, conserved                                                                   |  |   |   |    |  |  |    |      |  | NC | 4 |  | PM |  |    |
| 551 | Tb927.7.2670   | hypothetical protein, conserved,zinc finger protein family member, putative                       |  | S | 1 |    |  |  |    |      |  | S  | 4 |  | PM |  |    |
| 552 | Tb927.9.10070  | hypothetical protein, conserved                                                                   |  |   |   |    |  |  | N  | 81.4 |  | NC | 3 |  | S  |  | S  |
| 553 | Tb927.10.15950 | TFIID-like protein, putative                                                                      |  |   |   |    |  |  | M  | 87.6 |  |    |   |  |    |  | N  |
| 554 | Tb927.5.1160   | hypothetical protein, conserved                                                                   |  |   |   |    |  |  | C  | 87.6 |  | NC | 8 |  |    |  | C  |
| 555 | Tb927.6.2720   | calcium-binding protein, putative                                                                 |  |   |   |    |  |  | S  |      |  | S  | 3 |  |    |  | S  |
| 556 | Tb927.6.2720   | calcium-binding protein, putative                                                                 |  | S | 1 |    |  |  |    |      |  | NC | 5 |  | S  |  | S  |
| 557 | Tb927.11.15240 | small GTPase, putative,ras-related protein rab-2a, putative                                       |  |   |   |    |  |  | C  |      |  | NC | 2 |  |    |  | C  |
| 558 | Tb927.10.600   | hypothetical protein, conserved                                                                   |  |   |   |    |  |  | C  | 87.6 |  | M  | 2 |  | C  |  | C  |
| 559 | Tb927.9.15060  | rRNA processing protein, putative                                                                 |  |   |   |    |  |  | N  | 93.9 |  | NC | 6 |  | N  |  | N  |
| 560 | Tb927.9.5040   | cAMP-specific phosphodiesterase                                                                   |  |   |   |    |  |  | C  | 93.9 |  | NC | 5 |  |    |  | C  |
| 561 | Tb927.8.4500   | eukaryotic translation initiation factor 4 gamma, putative                                        |  |   |   |    |  |  | P  | 81.4 |  | NC | 3 |  |    |  | C  |
| 562 | Tb927.9.5280   | hypothetical protein, conserved                                                                   |  |   |   |    |  |  | G  | 93.9 |  | M  | 2 |  |    |  |    |
| 563 | Tb927.2.4090   | hypothetical protein, conserved                                                                   |  | S | 1 |    |  |  |    |      |  | S  | 3 |  |    |  | S  |
| 564 | Tb927.8.4890   | endoplasmic reticulum oxidoreductin, putative,pol-associated gene 1                               |  | S | 1 |    |  |  | L  | 87.6 |  | S  | 4 |  | S  |  | S  |
| 565 | Tb927.10.790   | vesicle-associated membrane protein, putative,synaptobrevin, putative                             |  |   |   |    |  |  | M  | 81.4 |  |    |   |  |    |  |    |
| 566 | Tb927.11.3240  | T-complex protein 1, zeta subunit, putative                                                       |  |   |   |    |  |  | M  | 93.9 |  | NC | 2 |  |    |  |    |
| 567 | Tb927.11.10170 | hypothetical protein, conserved                                                                   |  |   |   |    |  |  | G  | 87.6 |  |    |   |  |    |  |    |
| 568 | Tb927.10.10880 | ATP-binding cassette protein, putative,ABC transporter, putative,ATPase, putative                 |  |   |   |    |  |  | P  | 93.9 |  | NC | 5 |  |    |  |    |
| 569 | Tb927.11.2570  | hypothetical protein, conserved                                                                   |  |   |   |    |  |  |    |      |  |    |   |  |    |  |    |
| 570 | Tb927.8.3150   | T-complex protein 1, gamma subunit, putative                                                      |  |   |   |    |  |  | C  | 93.9 |  | NC | 2 |  |    |  | C  |
| 571 | Tb927.11.11160 | sodium/sulphate symporter, putative                                                               |  |   |   |    |  |  |    |      |  | NC | 4 |  | PM |  |    |
| 572 | Tb927.10.14030 | hypothetical protein, conserved                                                                   |  | S | 1 |    |  |  |    |      |  | S  | 4 |  | S  |  | S  |
| 573 | Tb927.11.2120  | hypothetical protein, conserved                                                                   |  |   |   |    |  |  | G  | 81.4 |  | NC | 4 |  |    |  |    |
| 574 | Tb927.11.14960 | pumilio/PUF RNA binding protein 7, putative                                                       |  |   |   |    |  |  | P  | 81.4 |  |    |   |  |    |  |    |
| 575 | Tb927.6.4970   | serine/arginine-rich protein specific kinase SRPK, putative,protein kinase, putative              |  |   |   |    |  |  | N  | 100  |  | NC | 3 |  | N  |  | N  |
| 576 | Tb927.10.14390 | hypothetical protein, conserved                                                                   |  |   |   |    |  |  |    |      |  | NC | 2 |  |    |  |    |
| 577 | Tb927.9.9940   | PACRGB flagellar component                                                                        |  |   |   |    |  |  | P  | 100  |  | NC | 2 |  |    |  |    |
| 578 | Tb927.10.4430  | pumilio RNA binding protein PUF1                                                                  |  |   |   |    |  |  | C  | 100  |  | NC | 4 |  |    |  | C  |
| 579 | Tb927.6.5210   | variant surface glycoprotein (VSG, pseudogene), putative.variant surface glycoprotein, frameshift |  |   |   |    |  |  | N  | 81.4 |  |    |   |  |    |  |    |
| 580 | Tb927.8.1240   | electron transfer flavoprotein-ubiquinone oxidoreductase, putative                                |  |   |   |    |  |  |    |      |  |    |   |  |    |  |    |
|     | Tb927.10.12260 | cytosolic nonspecific dipeptidase, putative,peptidase (M20/M25/M40 family), putative              |  |   |   |    |  |  | P  | 81.4 |  | NC | 4 |  |    |  |    |
