# Supplementary material for: Proteomic Analysis of the Acidocalcisome, an Organelle Conserved from Bacteria to Human Cells
Source: PubMed Central journal article supplement (PMC4263762; doi:10.1371/journal.ppat.1004555), 2014-12-11
Supplement: ppat.1004555.s016.pdf [file ppat.1004555.s016.pdf]

**Table S6**

Primers used to generate probes for blotting and constructs for antibody production or RNAi (the underlined nucleotides indicate the primer extension sequences for ligation independent cloning or the introduced *HindIII* and *BamHI* sites).

| <b>Name</b> | <b>Sequences</b>                                             |
|-------------|--------------------------------------------------------------|
| TbIP3BD-F   | 5' - <u>GACGACGACAAGATGGGAAATGTTACCGTGATATGCC</u> -3'        |
| TbIP3BD-R   | 5' - <u>GAGGAGAAGCCCGGTTTATCCTGCCTTGAGCTCCGGCGCTTGAC</u> -3' |
| TbTubb-F    | 5' -ATGCGCGAAAATCGTCTGCGTTCAGG-3'                            |
| TbTubb-R    | 5' -AGTGCAGACGCGGGAATGGGACAAG-3'                             |
| TbVAa-IF    | 5' -CGGGATCCGAGTACGAGGGGAACTTCGTG-3'                         |
| TbVAa-IR    | 5' -CCCAAGCTTATTTTAACATGTTTCGTGGAG-3'                        |
| TbVAd-IF    | 5' -CGGGATCCAATACGCCAGTTTGGTCCAG-3'                          |
| TbVAd-IR    | 5' -CCCAAGCTTCCGGCTGTCATCAAGCAGTTC-3'                        |
| TbVIT-IF    | 5' -CGGGATCCACAAAGAGGTCCACAACCCCTCTG-3'                      |
| TbVIT-IR    | 5' -CCCAAGCTTAGCTGCGGAACGTAACATGCTTAC-3'                     |
| TbZnT-IF    | 5' -CGGGATCCTGGAAATGTGTACAAGTATCGAC-3'                       |
| TbZnT-IR    | 5' -CCCAAGCTTTCGGAGGCAATCGACCACACGTG-3'                      |
