# Supplementary material for: Proteomic Analysis of the Acidocalcisome, an Organelle Conserved from Bacteria to Human Cells
Source: PubMed Central journal article supplement (PMC4263762; doi:10.1371/journal.ppat.1004555), 2014-12-11
Supplement: ppat.1004555.s017.pdf [file ppat.1004555.s017.pdf]

**Table S7.** Common features of acidocalcisome proteins identified by the ELM server

| <b>Protein</b>         | <b>Signal peptide and other characteristics</b> | <b>CK1 phosphorylation site (MOD_CK1_1)</b>               | <b>CK2 phosphorylation site (MOD_CK2_1)</b>                                  | <b>GSK3 phosphorylation recognition site (MOD_GSK3_1)</b>                                                                                                                                                         | <b>Phosphothreonine motif binding a subset of FHA domains that show a preference for a large aliphatic amino acid at the pT+3 position (LIG_FHA_1)</b> | <b>NEK2 phosphorylation motif with preferred Phe, Leu or Met in the -3 position to compensate for less favorable residues in the +1 and +2 position (MOD_NEK2_1)</b> | <b>Tyrosine-based sort signal responsible for the interaction with <math>\mu</math> sub of adaptor protein complex (TRG_ENDOTIC_2)</b>                     |
|------------------------|-------------------------------------------------|-----------------------------------------------------------|------------------------------------------------------------------------------|-------------------------------------------------------------------------------------------------------------------------------------------------------------------------------------------------------------------|--------------------------------------------------------------------------------------------------------------------------------------------------------|----------------------------------------------------------------------------------------------------------------------------------------------------------------------|------------------------------------------------------------------------------------------------------------------------------------------------------------|
| VP1<br>Tb927.4.4380    | Yes (1-24)<br>14 TMD<br>826 aa                  | SITSGIK (63-69)<br>SGGSDDD (228-234)<br>SCETGAA (503-509) | LFGSFGE (364-370)<br>IAASSAE (378-384)                                       | YVISKRVS (125-132)<br>AVYTNSRT (213-220)<br>AASSAELS (379-386)<br>AELSADFT (383-390)<br>SCETGAAT (503-510)<br>VAISASNT (742-749)                                                                                  | SITSGIK (63-69)<br>HLTDEVM (115-121)<br>EITDALD (588-594)                                                                                              | LMQTYF (277-282)<br>LGGSSV (301-306)<br>LFGSFG (364-369)                                                                                                             | YRPV (4944-4950)<br>YGPI (566-569)                                                                                                                         |
| Vtc4<br>Tb927.11.12220 | No<br>2 TMD<br>793 aa                           | *257-263<br>*303-309<br>*367-373<br>*405-411              | NPATPDE (40-46)<br>DYLSEEE (81-87)<br>HALSIDE (167-173)<br>RASTKPE (503-509) | MKASDYLS (77-84)<br>DYLSEEEET (81-88)<br>TNMSMVFS (90-97)<br>MVFSMVGS (94-101)<br>QTQTVGAS (539-546)<br>HMNSVAPT (572-579)<br>VAPTMSPT (576-583)<br>GVESLCFT (626-633)<br>DPKLLTS (664-671)<br>PMLTGSDT (785-792) | AITYELL (118-124)<br>LNTDTIE (132-138)<br>GHTPFIK (483-489)<br>DPTIGIA (514-520)<br>RTTDRVI (526-532)<br>AQTQTVG (538-544)<br>PRTDCLR (552-558)        | LYNSLL (47-52)<br>MVFSMV (94-99)<br>FMLSKV (176-181)<br>LCFTST (630-635)<br>FTSTGG (632-637)<br>FGNSMS (695-700)                                                     | YPDF (12-15)<br>YNSL (48-51)<br>YELL (121-124)<br>YAVL (147-150)<br>YHAL (166-169)<br>YEHV (182-185)<br>YQRV (560-563)<br>YTAF (614-617)<br>YGPM (783-786) |
| Vtc1<br>Tb927.7.3900   | No<br>3 TMD<br>180 aa                           | *96-102                                                   |                                                                              | RNTSGSVS (42-49)<br>YYRTASSS (165-172)                                                                                                                                                                            | *141-147                                                                                                                                               | *75-80<br>*84-89<br>*91-96<br>*114-119<br>*149-154                                                                                                                   | YEDL (33-36)                                                                                                                                               |

|                                   |                        |                                                                                                                                                                                                                                                                                                                                                                                                                                                                                                                                                                                               |                                                                                                                                                                                                                                                                                                                                                                                                                                                                                                                                                                                                  |                                                                                                                                                                                                                                                                                                                                                                                                                                                                                                                                                                                                           |                                                                                                                                                                                                                                                                                                                                                                                                                                                                                                                                                                                                            |                                                                                                                                                                                                                                                                                                                                                                                                                                                                                                                                                                      |                                                                                                                                                                                                                                                                                                                                                                                          |
|-----------------------------------|------------------------|-----------------------------------------------------------------------------------------------------------------------------------------------------------------------------------------------------------------------------------------------------------------------------------------------------------------------------------------------------------------------------------------------------------------------------------------------------------------------------------------------------------------------------------------------------------------------------------------------|--------------------------------------------------------------------------------------------------------------------------------------------------------------------------------------------------------------------------------------------------------------------------------------------------------------------------------------------------------------------------------------------------------------------------------------------------------------------------------------------------------------------------------------------------------------------------------------------------|-----------------------------------------------------------------------------------------------------------------------------------------------------------------------------------------------------------------------------------------------------------------------------------------------------------------------------------------------------------------------------------------------------------------------------------------------------------------------------------------------------------------------------------------------------------------------------------------------------------|------------------------------------------------------------------------------------------------------------------------------------------------------------------------------------------------------------------------------------------------------------------------------------------------------------------------------------------------------------------------------------------------------------------------------------------------------------------------------------------------------------------------------------------------------------------------------------------------------------|----------------------------------------------------------------------------------------------------------------------------------------------------------------------------------------------------------------------------------------------------------------------------------------------------------------------------------------------------------------------------------------------------------------------------------------------------------------------------------------------------------------------------------------------------------------------|------------------------------------------------------------------------------------------------------------------------------------------------------------------------------------------------------------------------------------------------------------------------------------------------------------------------------------------------------------------------------------------|
| PMC1<br>Tb927.8.1180              | No<br>8 TMD<br>1106 aa | SDGSVAV (31-37)<br>SSVTGEN (244-250)<br>SPLTTVQ (833-839)<br>SDASSLL (1049-1055)                                                                                                                                                                                                                                                                                                                                                                                                                                                                                                              | TVVSTAE (266-272)                                                                                                                                                                                                                                                                                                                                                                                                                                                                                                                                                                                | KDTSNYGT (5-12)<br>AFLSTGLT (22-29)<br>HKVTVDVT (204-211)<br>LSGTVVST (263-270)<br>FSLTVVGT (818-825)<br>EGKSSPLT (829-836)<br>GKSSPLTT (830-837)<br>ALATEQPT (854-861)<br>QRETDGTS (1042-1049)<br>TDGTS DAS (1045-1052)<br>DGTSDASS (1046-1053)                                                                                                                                                                                                                                                                                                                                                          | KVTVDVT (205-211)<br>DVTEIVV (209-215)<br>QFTVNLV (810-816)<br>LTTVQLL (835-841)<br>GSTRQLY (1094-1100)                                                                                                                                                                                                                                                                                                                                                                                                                                                                                                    | FLSTGL (23-28)<br>LSGTVV (263-268)<br>LMESRL (291-296)<br>LAYSQS (378-383)<br>LQFTVN (809-814)<br>FSLTVV (818-823)<br>LMDTLA (846-851)<br>LYDTLR (1099-1104)                                                                                                                                                                                                                                                                                                                                                                                                         | YGTL (10-13)<br>YREL (940-943)<br>YDTL (1100-11)                                                                                                                                                                                                                                                                                                                                         |
| IP <sub>3</sub> R<br>Tb927.8.2770 | No<br>5 TMD<br>3099 aa | SAGTRMA (216-222)<br>SSKSQGS (347-353)<br>SQGSDSH (350-356)<br>SLDSDPC (362-368)<br>SVVSQRS (471-477)<br>SQRSCCN (474-480)<br>SEGSETL (549-555)<br>SMCSVGT (866-872)<br>SVGTHGV (869-875)<br>SDRSRVC (988-994)<br>SELQAV (1049-1055)<br>SAVTTQL (1251-1257)<br>SGSTKDV (1258-1264)<br>STQTQNE (1373-1379)<br>SSSSAPE (1422-1428)<br>SETSRVP (1469-1475)<br>SYGTSYT (1678-1684)<br>SFGSITL (2012-2018)<br>SVITDIF (2050-2056)<br>SFETDYA (2060-2066)<br>SLYSSLK (2188-2194)<br>STGTGIT (2328-2334)<br>SNSTDNK (2341-2347)<br>SAITHNG (2764-2770)<br>SWNSSTL (2848-2854)<br>SSQSSSL (3063-3069) | ADGTFSE (399-405)<br>AVDTILE (457-463)<br>FLWSQCE (582-588)<br>QTETDGE (611-617)<br>TSPTLME (630-636)<br>CQRTLAE (679-685)<br>VRNSSLE (836-842)<br>VLDSGGE (898-904)<br>YVQSELE (940-946)<br>HQVSATE (1094-1100)<br>YTWTRLE (1129-1135)<br>FVTSPTE (1207-1213)<br>IRGSVEE (1354-1360)<br>STQTQNE (1373-1379)<br>VTGTTNE (1380-1386)<br>SSSSAPE (1422-1428)<br>VHITMLE (1490-1496)<br>LSQSNAE (1520-1526)<br>LMQSRTE (1757-1763)<br>VGATFHE (1808-1814)<br>LLLSCRE (1987-1993)<br>VQCTNAE (2147-2153)<br>DCCTLNE (2351-2357)<br>LNETDSE (2355-2361)<br>CLLSLIE (2389-2395)<br>AYDSILE (2426-2432) | SQGSDSHS (350-357)<br>DSHSAGAT (354-361)<br>AGATSLDS (358-365)<br>SLDSDPCS (362-369)<br>VEGSAVDT (453-460)<br>GDGSPEGS (464-471)<br>YLCTSEGS (5454-552)<br>SEGSETLS (549-556)<br>GSETLSLS (551-558)<br>LSLSWKPS (555-558)<br>FLWSQCET (582-589)<br>QVLTTTEGT (598-605)<br>RYPSEGS (622-629)<br>AEGSTSPT (626-633)<br>PKGSNVGT (660-667)<br>NVGTGYAS (664-671)<br>DSLTRLFS (824-831)<br>SVGTHGVT (869-876)<br>HQVSATET (1094-1101)<br>KGPSDYQS (1239-1246)<br>YQSTVAGS (1244-1251)<br>VAGSAVTT (1248-1255)<br>SAVTTQLS (1251-1258)<br>RICTVRRS (1312-1319)<br>RRRSVGLS (1462-1469)<br>GPSSPAFS (1502-1509) | RQTHSVM (323-329)<br>NLTGDIV (480-486)<br>SETLSLS (552-558)<br>VGTHGVT (870-876)<br>ELTQAVK (1050-1056)<br>EGTLHVI (1057-1063)<br>SNTHFVR (1065-1071)<br>TETACLV (1099-1105)<br>AVTTQLS (1252-1258)<br>GSTKDVA (1259-1265)<br>SETSRVP (1469-1475)<br>DPTPHLT (1562-1568)<br>RFTACIV (1640-1646)<br>PVTHLLE (1668-1674)<br>SYTPLVE (1682-1688)<br>SRTETVL (1760-1766)<br>VQTGNLV (1852-1858)<br>IATADVP (1919-1925)<br>AATKCLD (1945-1951)<br>GATRAIA (2082-2088)<br>EFTRMLL (2173-2179)<br>LLTNALT (2178-2184)<br>ALTQCLL (2385-2391)<br>QHTNKLK (2472-2478)<br>CFTFILW (2825-2831)<br>RSTCFIC (2899-2905) | MALSAV (221-226)<br>LATSVA (285-290)<br>LLKTRQ (319-324)<br>LQCSCCT (412-417)<br>LQRTLF (511-516)<br>LSLSWK (555-560)<br>FLWSQC (582-587)<br>LHLTRS (852-857)<br>LTRSGR (854-859)<br>LLCSMC (863-868)<br>LLGSSK (1027-1032)<br>LGSSKL (1028-1033)<br>LSGSTK (1257-1262)<br>LSETSR (1468-1473)<br>FTLSQS (1518-1523)<br>LSQSNA (1520-1525)<br>FNLSSN (1539-1544)<br>LRESAR (1572-1577)<br>FTKTTV (1601-1606)<br>LGRSAL (1662-1667)<br>LEITLS (1673-1678)<br>LWESNS (1695-1700)<br>LLLSRQ (1745-1750)<br>LMQSRT (1757-1762)<br>MCMSVA (1815-1820)<br>LSGTM (1863-1868) | YVAV (450-453)<br>YNHI (645-648)<br>YASL (669-672)<br>YLQL (860-863)<br>YSFV (895-898)<br>YCSL (1191-11)<br>YNDL (1398-14)<br>YPFI (1498-150)<br>YIDI (1531-153)<br>YDAF (1621-16)<br>YTPL (1683-16)<br>YRRL (1776-17)<br>YRDV (1804-18)<br>YRRL (1843-18)<br>YKKI (1882-18)<br>YSAV (2100-21)<br>YSSL (2190-21)<br>YDNL (2249-22)<br>YDSI (2427-24)<br>YRLL (2726-27)<br>YLYF (2933-29) |

|                                   |                        |                                                                                                                                                                                                                                                                                            |                                                                                                                                                                     |                                                                                                                                                                                                                                                                                                                                                                                                                                                                                                                                                                                                                      |                                                                                                                                                                       |                                                                                                                                                                                                                                                                                                                                                                                                        |                                                                                                          |
|-----------------------------------|------------------------|--------------------------------------------------------------------------------------------------------------------------------------------------------------------------------------------------------------------------------------------------------------------------------------------|---------------------------------------------------------------------------------------------------------------------------------------------------------------------|----------------------------------------------------------------------------------------------------------------------------------------------------------------------------------------------------------------------------------------------------------------------------------------------------------------------------------------------------------------------------------------------------------------------------------------------------------------------------------------------------------------------------------------------------------------------------------------------------------------------|-----------------------------------------------------------------------------------------------------------------------------------------------------------------------|--------------------------------------------------------------------------------------------------------------------------------------------------------------------------------------------------------------------------------------------------------------------------------------------------------------------------------------------------------------------------------------------------------|----------------------------------------------------------------------------------------------------------|
|                                   |                        | SQSSSLR (3064-3070)<br>SAASVAE (3077-3083)<br>SKGTWLR (3087-3093)                                                                                                                                                                                                                          | RGLSAKE (2707-2713)<br>QFGSNGE (2798-2804)<br>NEFTGQE (2946-2952)<br>EADSDDE (2990-2996)<br>SAASVAE (3077-3083)<br>LRHSEPE (3092-3098)                              | YVFTLSQS (1516-1523)<br>LSQSNAES (1520-1527)<br>IVLSILAT (1552-1559)<br>KDPTPHLT (1561-1568)<br>CLPSPGVT (1626-1633)<br>ITLSYGTS (1675-1682)<br>LMQSRTET (1757-1764)<br>LSGTMLTT (1863-1870)<br>LLISGAAT (1940-1947)<br>QLITMEDS (1967-1974)<br>KHVSAENS (2042-2049)<br>AENSSVIT (2046-2053)<br>SVITDIFT (2050-2057)<br>MLLTNALT (2177-2184)<br>NALTTPPS (2181-2188)<br>TPPSLYSS (2185-2192)<br>VVISKLLS (2309-2316)<br>PDVTGTPS (2321-2328)<br>DCCTLNET (2351-2358)<br>DEVSWNSS (2845-2852)<br>NEFTGQES (2946-2953)<br>INRSSQSS (3060-3067)<br>NRSSQSSS (3061-3068)<br>SAASVAET (3077-3084)<br>ETSTSKGT (3083-3090) | ERTRGLA (3048-3054)                                                                                                                                                   | MLTTRR (1867-1872)<br>LAETGP (1902-1907)<br>LLISGA (1940-1945)<br>LLLSR (1987-1992)<br>FVSTTL (200-2005)<br>LLQTTF (2073-2078)<br>LQTTFS (2074-2079)<br>LGATRA (2081-2086)<br>MLLTNA (2177-2182)<br>LYSSLK (2189-2194)<br>FVCTLF (2222-2227)<br>MLQSAF (2279-2284)<br>FLKTVR (2451-2456)<br>LQHTNK (2471-2476)<br>FNETLQ (2698-2703)<br>LLVTRF (2717-2722)<br>LRSTCF (2898-2903)<br>LASSVV (2997-3002) |                                                                                                          |
| AP-3, $\beta$ 3<br>Tb927.11.10650 | No<br>No TMD<br>918 aa | SLASERA (11-17)<br>SGGSIVS (23-29)<br>SIVSRAR (26-32)<br>SLVSGDA (33-39)<br>SDSSDEA (276-282)<br>SSETTSS (306-312)<br>SETTSSS (307-313)<br>SSSSSSW (311-317)<br>SSSSSWD (312-318)<br>SSSSWDR (313-319)<br>SLNSAVV (352-358)<br>SIISKLA (433-439)<br>SVCTSQV (479-485)<br>SFKTEGS (575-581) | AALSFVE (213-219)<br>ISDSSDE (275-281)<br>DGESSSE (302-308)<br>IVLTHAE (402-408)<br>AEHTHYE (667-673)<br>GNSTSDE (779-785)<br>EQRTPAE (793-799)<br>TVPTETE *48-854) | EFISSGGS (19-26)<br>SIVSRARS (26-33)<br>VRKTA AIS (170-177)<br>DGESSSET (302-309)<br>GESSSETT (303-310)<br>ESSSETTS (304-311)<br>SSETTSSS (306-313)<br>SETTSSSS (307-314)<br>ETTSSSSS (308-315)<br>TTSSSSSS (309-316)<br>ERHSVLS (390-397)<br>VVLSTIHT (394-401)<br>TIHTIVLT (398-405)<br>SIISKLAT (433-440)                                                                                                                                                                                                                                                                                                         | LDTEPLV (164-170)<br>RKTA AIS (171-177)<br>AATAVIC (360-366)<br>ACTLPLL (376-382)<br>IHTIVLT (399-405)<br>VCTSQVM (480-486)<br>RQTARLV (520-526)<br>KTTASVE (893-899) | FISSGG (20-25)<br>FFVTHY (104-109)<br>LSISAF (119-124)<br>MDHSMH (129-134)<br>LLDSVK (342-347)<br>LLMSLN (349-354)<br>LKLSII (430-435)<br>LVKFSK (572-577)<br>LDGSGA (598-603)                                                                                                                                                                                                                         | YFFV (103-106)<br>YSIL (195-198)<br>YRNL (232-235)<br>YRLL (527-530)<br>YARL (630-633)<br>YHPL (688-691) |

|                                |                        |                                                                                                                                                                                                                                                                                                                           |                                                                                                                                                                                                                                   |                                                                                                                                                                                                                                                                                                                                                                                                                                                                                                               |                                                                                                                                                                                                                                                                                                                                                                                                                                                     |                                                                                                                                                                                                                                                                                                                                                                                                               |                                                                                                                                                                                                                        |
|--------------------------------|------------------------|---------------------------------------------------------------------------------------------------------------------------------------------------------------------------------------------------------------------------------------------------------------------------------------------------------------------------|-----------------------------------------------------------------------------------------------------------------------------------------------------------------------------------------------------------------------------------|---------------------------------------------------------------------------------------------------------------------------------------------------------------------------------------------------------------------------------------------------------------------------------------------------------------------------------------------------------------------------------------------------------------------------------------------------------------------------------------------------------------|-----------------------------------------------------------------------------------------------------------------------------------------------------------------------------------------------------------------------------------------------------------------------------------------------------------------------------------------------------------------------------------------------------------------------------------------------------|---------------------------------------------------------------------------------------------------------------------------------------------------------------------------------------------------------------------------------------------------------------------------------------------------------------------------------------------------------------------------------------------------------------|------------------------------------------------------------------------------------------------------------------------------------------------------------------------------------------------------------------------|
|                                |                        | SDNSSDS (737-743)<br>SSDSGTC (740-746)<br>SGSSDAS (749-755)<br>SDASTSV (752-758)<br>SVHSSYT (757-763)<br>SSYTGDD (760-766)<br>SDASSKT (806-812)<br>SSKTNIT (809-815)<br>SGGTPGA (870-876)<br>SSTTAGN (877-883)                                                                                                            |                                                                                                                                                                                                                                   | VRLSSVCT (475-482)<br>RLSSVCTS (476-483)<br>GNSSGRQT (515-522)<br>GADSGDDS (715-722)<br>DDSSMMYS (730-737)<br>MMYSDNSS (734-741)<br>DNSSDSGT (738-745)<br>DSGTCRGS (742-749)<br>GSGSSDAS (748-755)<br>SGSSDAST (749-756)<br>DASTSVHS (753-760)<br>ASTSVHSS (754-761)<br>GYSSTDGS (767-774)<br>IRPSDASS (803-810)<br>SGGTPGAS (870-877)<br>DTPTREGS (907-914)                                                                                                                                                  |                                                                                                                                                                                                                                                                                                                                                                                                                                                     |                                                                                                                                                                                                                                                                                                                                                                                                               |                                                                                                                                                                                                                        |
| AP-3, $\delta$<br>Tb927.5.3610 | No<br>1 TMD<br>1127 aa | SNESEAE (27-33)<br>SEVTSTV (44-50)<br>STVSSPD (135-141)<br>SMLSTIQ (232-238)<br>SNWTLIK (239-245)<br>SDPSRSS (472-478)<br>SRSSQWE (475-481)<br>SNGTAKV (576-582)<br>SAVSAAP (733-739)<br>SATTEGT (815-821)<br>SSSSMRN (879-885)<br>SDRSIFV (943-949)<br>SFYSVLQ (1067-1073)<br>SRKSAAN (1074-1080)<br>SEHTSLA (1105-1111) | FQNTLAE (13-19)<br>KLRSSNE (23-29)<br>SNESEAE (27-33)<br>KLDSSSE (190-196)<br>VLATVIE (395-401)<br>SRSSQWE (475-481)<br>DSLTFEE (556-562)<br>LSPSDSE (671-677)<br>LPPSLTE (971-977)<br>VDTTSVE (1010-1016)<br>EHTSLAE (1106-1112) | KLRSSNES (23-30)<br>DIKSEVTS (41-48)<br>EVTSTVQS (45-52)<br>TVQSVKVT (49-56)<br>YCISTVSS (132-139)<br>YPESLRPT (176-183)<br>PFFSMLST (229-236)<br>SMLSTIQS (232-239)<br>VQTTGAKS (272-279)<br>NGMSKTPS (290-297)<br>MSKTPSLT (292-299)<br>EVLSGLVT (360-367)<br>VAQTDDYS (402-409)<br>NELSQLLS (458-465)<br>LLLSERIS (506-513)<br>LRASILQT (563-570)<br>ILQTEAIT (567-574)<br>VGATGSIS (583-590)<br>AGLSPSDS (669-676)<br>QSATTEGT (814-821)<br>VEISNLAS (872-879)<br>SDRSIFVS (943-950)<br>KGTTLRT (954-961) | EVTSTVQ (45-51)<br>KVTAVLK (54-60)<br>PKTEVLP (103-109)<br>LLTALLK (110-116)<br>SKTPSLT (293-299)<br>SLTKIVA (297-303)<br>SNTNLLK (465-471)<br>RRTCELL (501-507)<br>LQTEAIT (568-574)<br>NGTAKVV (577-583)<br>GATGSIS (584-590)<br>DVTRSLA (792-798)<br>RVTAFLV (851-857)<br>QITMAVE (867-873)<br>YTTERVR (897-903)<br>KGTTLR (954-960)<br>LRTKMLL (959-965)<br>SLTEPLL (974-980)<br>KPTESLL (90-996)<br>VDTTSVE (1010-1016)<br>VLTCFVA (1031-1037) | FQNTLA (13-18)<br>LSSTNQ (119-124)<br>MLSTIQ (233-238)<br>FVSTIN (371-376)<br>LDISLV (422-427)<br>LSNTNL (464-469)<br>LRASIL (563-568)<br>FRHSVH (606-611)<br>LQQSAT (812-817)<br>LRVTAF (850-855)<br>FVLSCR (855-860)<br>LASSSS (877-882)<br>MKGTTT (953-958)<br>MLLTF (963-968)<br>LTFSGS (965-970)<br>FSGSLP (67-972)<br>LLFSL (979-984)<br>FAKSHV (1005-1010)<br>FMQTIM (1017-1022)<br>LLMTAT (1121-1126) | YKRI (89-92)<br>YRIF (170-173)<br>YPRL (184-187)<br>YECI (282-285)<br>YGLL (319-322)<br>YSYV (408-411)<br>YVKI (417-420)<br>YDAI (693-696)<br>YGRL (809-812)<br>YLRV (849-852)<br>YRYF (1002-1008)<br>YSVL (1069-1073) |

|                                                        |                        |                                                                                                                                                                    |                                                                                                                                                 |                                                                                                                                                                                                                                                                                                                                                                                                                          |                                                                                                                                                |                                                                                                                                                                                                                                            |                                                                                     |
|--------------------------------------------------------|------------------------|--------------------------------------------------------------------------------------------------------------------------------------------------------------------|-------------------------------------------------------------------------------------------------------------------------------------------------|--------------------------------------------------------------------------------------------------------------------------------------------------------------------------------------------------------------------------------------------------------------------------------------------------------------------------------------------------------------------------------------------------------------------------|------------------------------------------------------------------------------------------------------------------------------------------------|--------------------------------------------------------------------------------------------------------------------------------------------------------------------------------------------------------------------------------------------|-------------------------------------------------------------------------------------|
|                                                        |                        |                                                                                                                                                                    |                                                                                                                                                 | MLLTFSGS (963-970)<br>FSGSLPPS (967-974)<br>LLFSLLYT (979-986)<br>FAKSHVDT (1005-012)<br>LSESPVLT (1026-1033)<br>SFYSVLQS (1067-1074)<br>AVKSEHTS (1102-1109)                                                                                                                                                                                                                                                            |                                                                                                                                                |                                                                                                                                                                                                                                            |                                                                                     |
| VSP<br>Tb927.11.7060                                   | No<br>No TMD<br>414 aa | SDRTSPQ (11-17)<br>SLGTNIS (32-38)<br>SMVSADF (153-159)                                                                                                            | DLETGRE (189-195)<br>LVRTKPE (211-217)                                                                                                          | DSRSDRTS (8-15)<br>SLGTNIST (32-39)<br>NISTGRGS (36-43)<br>KIMSRLFS (79-86)<br>HSRTRKCF (146-153)<br>SMVSADFS (153-160)                                                                                                                                                                                                                                                                                                  | NNTHGVD (2-8)                                                                                                                                  | MNNTHG (1-6)<br>FSASLG (29-34)<br>FDVTHL (88-93)<br>LVRTKP (211-216)                                                                                                                                                                       | YRVL (181-184)                                                                      |
| V-H <sup>+</sup> -ATPase,<br>Subunit a<br>Tb927.5.1300 | No<br>6 TMDP<br>783 aa | SDVSAFQ (47-53)<br>SNRTQEH (123-129)<br>SVFSTMN (281-287)<br>SGSTAVA (292-298)<br>SVDTFRS (447-453)<br>SSPSGVT (472-478)<br>SGVTPAR (475-481)<br>SQLSEVF (698-704) | QYQSLLE (115-121)<br>TPFSEGE (183-189)<br>TLNSQLE (239-245)<br>IRASLQE (310-316)<br>QVLTIVE (324-330)<br>EEISTKE (330-336)<br>EAPSLLE (573-579) | LWRSEDMT (9-16)<br>QRETAHDS (23-30)<br>AGLTCVST (80-87)<br>YRITRGNS (167-174)<br>RGNSVLHT (171-178)<br>VLHTDEIT (175-182)<br>DEITPPFS (179-186)<br>TLNSQLET (239-246)<br>QLETMKHT (243-250)<br>MKHTLQQS (247-254)<br>VEKSVFST (278-285)<br>KRPTCFFT (337-344)<br>CFFTNKFT (341-348)<br>CFQSIVDS (350-357)<br>SGVTPARS (475-482)<br>QRTSEAPS (569-576)<br>EAPSLLET (573-580)<br>GCVSNTAS (679-686)<br>WALS LAHS (691-698) | VSTE AIG (85-91)<br>LLTGVIP (149-155)<br>LHTDEIT (176-182)<br>FATPRLW (203-209)<br>ESTERLQ (228-234)<br>RQTVAVE (273-279)<br>PGTVNVP (588-594) | LRLTMQ (18-23)<br>LEESNR (120-125)<br>LWESLK (208-213)<br>MRDTLN (236-241)<br>MKHTLQ (247-252)<br>LQQSLL (251-256)<br>LLTSIS (261-266)<br>LKFSGS (289-294)<br>FSGSTA (291-296)<br>FYNSVK (500-505)<br>LLETMT (577-582)<br>LAHSQL (695-700) | YQSL (116-119)<br>YKEV (363-366)<br>YNSV (501-504)<br>YLRL (687-690)                |
| V-H <sup>+</sup> -ATPase,<br>Subunit d<br>Tb927.5.550  | No<br>No TMD<br>383 aa | SFGSLVD (245-251)<br>STSSSSA (286-292)<br>SSSSAKG (288-294)<br>SGQTGAS (309-315)                                                                                   | AGASSLE (317-323)                                                                                                                               | ADTLV LRS (217-224)<br>VLRSTVNT (221-228)<br>LDDSR YNS (279-286)<br>RYNSTSSS (283-290)<br>YNSTSSSS (384-291)                                                                                                                                                                                                                                                                                                             | GATAEVM<br>(203-209)<br>VNTMGVP (226-232)<br>EVTVALY (328-334)                                                                                 | LRSTVN (222-227)<br>LDDSR Y (279-284)<br>LEVS NL (356-361)                                                                                                                                                                                 | YASL (32-35)<br>YGNF (53-56)<br>YEHM (102-104)<br>YE QF (191-194)<br>YGVF (344-347) |

|                                          |                        |                                                                                |                                                                                                       |                                                                                                                                                                                                 |                                                                                |                                                                                                                                          |                                                                                                       |
|------------------------------------------|------------------------|--------------------------------------------------------------------------------|-------------------------------------------------------------------------------------------------------|-------------------------------------------------------------------------------------------------------------------------------------------------------------------------------------------------|--------------------------------------------------------------------------------|------------------------------------------------------------------------------------------------------------------------------------------|-------------------------------------------------------------------------------------------------------|
|                                          |                        |                                                                                |                                                                                                       | NAVSGAAS (302-309)                                                                                                                                                                              |                                                                                |                                                                                                                                          | YVSI (379-382)                                                                                        |
| Pho91<br>Tb927.11.11160                  | No<br>9 TMD<br>728 aa  | SPLTGVE (32-38)<br>SHPSAHN (274-280)<br>SVLSFHD (452-458)                      | SPLTGVE (32-38)<br>KLNSPRE (99-105)<br>AFESSTE (110-116)<br>LGRTHLE (356-362)<br>IRPTLWE (408-414)    | FIHSSPLT (28-35)<br>FESSTENS (111-118)<br>KNITINQT (241-248)<br>VASTTVAS (324-331)<br>GMLSPIAS (437-444)<br>IADSLHDT (591-598)<br>PPYTTLVS (603-610)                                            | PLTGVEF (33-39)<br>FMTDVDA (221-227)<br>GRTHLEV (357-363)<br>RPTLWEF (409-415) | FIHSSP (28-33)<br>LGRTHL (356-361)<br>LHDTLV (595-600)                                                                                   | YKRL (22-25)<br>YTTL (605-608)<br>YVVF (721-724)                                                      |
| Vacuolar iron transporter<br>Tb927.3.800 | No<br>3 TMD<br>281 aa  | SNSSVAS (78-84)<br>SVASVLI (81-87)<br>SGVSMLR (242-248)                        | IEMSRME (30-36)                                                                                       | GSNSSVAS (77-84)<br>SGVSMLRS (242-249)                                                                                                                                                          | FETGDIE (25-31)<br>DATTIVN (150-156)<br>MMTEELG (169-175)                      | FGFSNV (88-93)<br>MLRSAA (246-251)                                                                                                       | YKSI (15-18)<br>YKEV (42-45)                                                                          |
| Zinc transporter<br>Tb927.8.7460         | No<br>5 TMD<br>471 aa  | SLNSTEV (48-54)<br>SIMSLRA (106-112)<br>SRTSCGK (114-120)<br>SIASDYA (410-416) | TEATHME (202-208)<br>EEDSLCE (261-267)<br>HGHSSE (282-288)<br>HSGSEGE (284-290)                       | PCSSGPHS (13-20)<br>DQQSLNST (45-52)<br>GNISQRPT (187-194)<br>EMCTSIDS (208-215)<br>FGGSHHHS (247-254)<br>HDHSHSHS (292-299)<br>INYSSELLS (385-392)<br>ELLSALRS (389-396)<br>LCHSLCAS (459-466) | HTTIQVD (445-451)                                                              | MLATTA (167-172)<br>LATTAQ (168-173)<br>FGGSHH (247-252)<br>LMESTP (377-382)<br>FGITHT (441-446)<br>LCHSLC (459-464)<br>LCASAQ (463-468) | YYGF<br>YSEL<br>YAAL                                                                                  |
| Acid phosphatase<br>Tb927.10.7020        | Yes<br>0 TMD<br>435 aa |                                                                                | NDYSDTE (304-310)<br>YSDTEQE (306-312)<br>PEKSVGE (357-363)<br>QLCTLKE (395-401)<br>CNFTITE (420-426) | PVSDMDT (161-168)                                                                                                                                                                               |                                                                                | LVLTKL (48-53)<br>FNRSRH (116-121)<br>LNTSLS (190-195)<br>FLKTVA (227-232)<br>LNRSTS (292-297)<br>FGFTFN (330-335)                       | YWSM (68-71)<br>YRDF (108-11)<br>YAFL (225-228)<br>YTSV (279-282)<br>YRIL (286-289)<br>YVRL (371-374) |
| Polyamine Transporter 1<br>Tb927.9.10340 | Yes<br>11 TMD<br>492   | SNVTDER (4-40)<br>SAFSKSL (151-157)                                            | WNFSGFE (227-233)<br>FEGSIVE (472-47*)                                                                | VDNSLYPT (131-138)<br>TITVVPQS (208-215)<br>WNFSGFES (227-234)<br>QLTTTSRS (321-328)                                                                                                            |                                                                                | MHMSNV (1-6)<br>LGISAF (148-153)<br>FSKSLV (153-158)<br>LTTTSR (322-327)<br>MCASLK (439-444)<br>FEGSIV (472-477)                         | YPTI (136-139)<br>YESL (488-491)                                                                      |

\* excluded ELMs falling inside SMART/PFAM domains and/or scoring poorly with the structural filter.
